# Supplementary material for: Brain-wide single neuron reconstruction reveals morphological diversity in molecularly defined striatal, thalamic, cortical and claustral neuron types
Source: Research Square preprint supplement (doi:10.21203/rs.3.rs-84255/v1), 2020-10-07
Supplement: Supplementary file 1 [file 10a08acfa2fc978710b33af9.xlsx]

## Sheet: Sheet1
	Soma_x	Soma_y	Soma_z	Registered_soma_region	Manually_corrected_soma_region	Cortical_layer	Transgenic_line	Brain_id	Subclass_or_type	Notes	ipsi_FRP	ipsi_MOp	ipsi_MOs	ipsi_SSp-n	ipsi_SSp-bfd	ipsi_SSp-ll	ipsi_SSp-m	ipsi_SSp-ul	ipsi_SSp-tr	ipsi_SSp-un	ipsi_SSs	ipsi_GU	ipsi_VISC	ipsi_AUDd	ipsi_AUDp	ipsi_AUDpo	ipsi_AUDv	ipsi_VISal	ipsi_VISam	ipsi_VISl	ipsi_VISp	ipsi_VISpl	ipsi_VISpm	ipsi_VISli	ipsi_VISpor	ipsi_ACAd	ipsi_ACAv	ipsi_PL	ipsi_ILA	ipsi_ORBl	ipsi_ORBm	ipsi_ORBvl	ipsi_AId	ipsi_AIp	ipsi_AIv	ipsi_RSPagl	ipsi_RSPd	ipsi_RSPv	ipsi_VISa
17109_1701_x8048_y22277	2801.7	3705.95	3800	AId	AId	5	Gnb4-IRES2-CreERT2;Ai140_297974-17109	17109			3042.94	1212.32	14600	0	0	0	0	0	0	0	0	208.062	0	0	0	0	0	0	0	0	0	0	0	0	0	0	209.731	0	0	6753.85	0	337.56	10936	0	1314.14	0	0	0	0
17109_1801_x6698_y12550	2870.18	3370.43	3898.15	AId	AId	6a	Gnb4-IRES2-CreERT2;Ai140_297974-17109	17109			3484.71	1868.72	31862.1	0	0	0	0	0	0	0	0	0	0	0	0	0	0	0	0	0	0	0	0	0	0	0	1179.1	89.2656	0	5670.93	0	39.9417	4548.82	0	29.8804	0	0	0	0
17109_1901_x9602_y10508	3078.68	4598.58	3048.43	AId	AId	2/3	Gnb4-IRES2-CreERT2;Ai140_297974-17109	17109			2554.4	0	1214.14	0	0	0	0	0	0	0	0	0	0	0	0	0	0	0	0	0	0	0	0	0	0	0	259.843	459.852	0	2381.44	703.078	0	11936.7	0	277.296	0	0	0	0
17109_2201_x8046_y23301	3287.07	3546.38	3392.45	MOs	MOs	6a	Gnb4-IRES2-CreERT2;Ai140_297974-17109	17109			1082.47	25010.6	16450.6	0	0	0	7913.81	0	0	0	0	0	0	0	0	0	0	0	0	0	0	0	0	0	0	0	0	0	0	3930.18	0	0	7251.21	0	338.417	0	0	0	0
17109_2301_x8535_y23051	3364.8	3742.77	3509.92	AId	AId	6a	Gnb4-IRES2-CreERT2;Ai140_297974-17109	17109			0	8096.6	12248.1	0	0	0	29.8626	0	0	0	0	19.6687	0	0	0	0	0	0	0	0	0	0	0	0	0	0	129.799	19.9947	0	329.461	0	0	3563.2	0	149.813	0	0	0	0
17109_2301_x9418_y23665	3324.73	4101.6	3220.05	AId	AId	5	Gnb4-IRES2-CreERT2;Ai140_297974-17109	17109			2386.74	1206.86	6628.94	0	0	0	2557.14	0	0	0	0	3377.89	0	0	0	0	0	0	0	0	0	0	0	0	0	0	89.7996	2102.36	0	1500.29	19.7885	0	11512.9	0	0	0	0	0	0
17109_2401_x8977_y24184	3473.68	3864.1	2994.95	MOp	MOp	5	Gnb4-IRES2-CreERT2;Ai140_297974-17109	17109			0	15357.5	7762.48	0	0	0	660.255	0	0	0	0	566.301	0	0	0	0	0	0	0	0	0	0	0	0	0	0	0	0	0	0	0	0	2769.42	0	0	0	0	0	0
17109_2401_x9338_y2394	3468.4	4033.8	3201.4	AId	AId	5	Gnb4-IRES2-CreERT2;Ai140_297974-17109	17109			4928.87	419.816	24349	0	0	0	0	0	0	0	0	0	0	0	0	0	0	0	0	0	0	0	0	0	0	4244.48	969.285	918.174	0	2355.34	0	317.846	5455.53	0	0	0	0	0	0
17109_2401_x9695_y9693	3760.35	4622.62	2762.85	AId	AId	5	Gnb4-IRES2-CreERT2;Ai140_297974-17109	17109			0	2083.91	13670.4	477.968	2217.27	0	1083.17	69.6826	0	545.295	669.262	0	0	299.534	0	567.288	0	3432.34	523.034	827.663	4024.48	0	667.16	0	0	6600.27	639.215	89.9683	0	0	0	0	2652.15	0	0	239.734	3552.97	8984.76	0
17109_2401_x9954_y9122	3753.4	4759.33	2461.5	AId	AId	2/3	Gnb4-IRES2-CreERT2;Ai140_297974-17109	17109			1790.79	439.932	12726.3	0	0	0	0	0	0	0	0	0	0	0	0	0	0	0	0	0	0	0	0	0	0	0	309.851	0	0	298.798	0	0	14663.9	1313.51	1169.47	0	0	0	0
17109_2500_x9864_y9311	3825.18	4703.15	2582.7	AId	AId	5	Gnb4-IRES2-CreERT2;Ai140_297974-17109	17109			0	2738	22401.2	0	0	616.157	0	0	275.995	0	0	0	0	0	0	0	0	0	0	0	0	0	0	0	0	8081.01	1173.12	571.699	0	0	0	0	4158.47	0	129.548	3241.18	7641.27	2293.26	0
17109_2601_x10213_y8783	4002.32	4834.98	2378.05	AId	AId	5	Gnb4-IRES2-CreERT2;Ai140_297974-17109	17109			418.474	3767.3	26459.9	0	0	444.679	0	0	3565.99	0	0	149.949	0	0	0	0	0	0	3127.39	0	2760.51	0	2174.23	0	0	8260.74	729.287	148.818	0	2448.38	109.226	3854.13	6148.67	0	299.487	8489.38	4444.53	39.9821	1895.63
17109_2601_x9296_y24691	3687.68	3928.9	2763.88	MOp	MOp	5	Gnb4-IRES2-CreERT2;Ai140_297974-17109	17109			219.373	12002	16026	0	0	0	5879.43	0	0	0	12614.8	5927.75	21737.5	0	0	0	0	0	0	0	0	0	0	0	0	0	0	0	0	0	0	0	1928.3	2690.77	0	0	0	0	0
17109_2601_x9498_y8169	4001.3	4583	2169.93	AId	AId	2/3	Gnb4-IRES2-CreERT2;Ai140_297974-17109	17109			0	8074.78	5437.85	0	0	0	0	0	0	0	0	1056.61	0	0	0	0	0	0	0	0	0	0	0	0	0	0	20.0004	0	0	0	0	0	5525.22	0	0	0	0	0	0
17109_3101_x10824_y7188	4610.4	5007.7	1841.07	AId	AId	2/3	Gnb4-IRES2-CreERT2;Ai140_297974-17109	17109			0	2924.54	13974.7	0	0	0	0	0	0	0	234	1348.3	617.758	0	0	0	0	0	0	0	0	0	0	0	0	1542.4	839.914	0	0	0	0	0	1809.28	0	129.688	3865.49	7299.04	2967.83	0
17109_3701_x9228_y26684	5030.6	3600.32	1966.88	SSs	SSs	5	Gnb4-IRES2-CreERT2;Ai140_297974-17109	17109			0	13354.9	7626.23	1113.84	0	0	37401.8	709.799	0	0	15893.8	0	0	0	0	0	0	0	0	0	0	0	0	0	0	149.521	819.093	0	0	0	0	0	619.18	0	0	0	0	0	0
17109_4101_x6753_y6197	5579.45	3078.35	1573.6	SSs	SSs	4	Gnb4-IRES2-CreERT2;Ai140_297974-17109	17109			0	2157.03	2349.25	18262	0	0	8430.75	799.185	0	249.92	31431.1	1104.45	10.0019	0	0	0	0	0	0	0	0	0	0	0	0	259.983	749.696	0	0	0	0	0	0	0	0	0	0	129.984	0
17109_4764_x6621_y5727	6280.6	2933.77	1516.45	SSs	SSs	4	Gnb4-IRES2-CreERT2;Ai140_297974-17109	17109			0	0	0	32964.1	23635.5	0	692.294	59.9687	0	2105.07	10416.4	0	0	0	0	0	0	0	0	0	0	0	0	0	0	0	0	0	0	0	0	0	0	0	0	0	0	0	0
17109_4772_x9038_y27257	6253.88	3208.7	1715.5	SSs	SSs	5	Gnb4-IRES2-CreERT2;Ai140_297974-17109	17109			0	70226.8	9397.76	2300.39	0	278.948	6836.9	18114.1	0	549.092	12252.1	0	0	0	0	0	0	0	0	0	0	0	0	0	0	0	0	0	0	0	0	0	0	0	0	0	0	0	0
17109_6201_x4328_y6753	8472.75	1546.38	2489.12	VISp	VISp	5	Gnb4-IRES2-CreERT2;Ai140_297974-17109	17109			0	0	0	0	5330.78	0	0	0	89.7312	0	2713.67	0	0	818.001	0	2328.85	0	15431.4	169.83	5986.89	36308.2	0	1938.85	19.9373	0	0	0	0	0	0	0	0	0	0	0	209.696	0	0	20.003
17109_6301_x4756_y24516	7915.05	1268.12	2619.1	VISrl	VISrl	5	Gnb4-IRES2-CreERT2;Ai140_297974-17109	17109			0	0	0	0	939.15	0	0	0	0	0	0	0	0	0	0	0	0	1114.85	659.644	0	5911.18	0	0	0	0	0	0	0	0	0	0	0	0	0	0	279.304	0	0	1295.1
17109_6401_x7641_y3978	8668.78	3047.12	1126.57	AUDv	AUDv	5	Gnb4-IRES2-CreERT2;Ai140_297974-17109	17109			0	0	0	0	129.785	0	0	0	0	0	875.949	0	0	895.065	3780.52	1795.35	2206.39	918.704	606.359	1828.66	8707.1	0	6946.39	979.515	319.209	0	0	0	0	0	0	0	0	0	0	8784.75	5099.37	0	0
17109_6401_x7989_y3767	8604.42	2986.32	1051.85	AUDv	AUDv	4	Gnb4-IRES2-CreERT2;Ai140_297974-17109	17109			0	0	0	0	0	0	0	0	0	0	6532.47	0	0	1506.14	2902.16	1069.23	2103.47	748.847	299.661	597.765	2185.19	0	309.71	289.868	0	0	0	0	0	0	0	0	0	0	0	0	0	0	0
17109_6501_x6997_y4287	8675.62	2797.3	1158.15	AUDpo	AUDpo	4	Gnb4-IRES2-CreERT2;Ai140_297974-17109	17109			0	1240.4	209.993	0	0	0	0	0	2570.92	0	248.574	0	0	668.453	8433.84	3183.89	174.504	9.99807	2856.11	539.939	2797.11	0	1384.28	219.969	0	0	0	0	0	0	0	0	0	0	0	6760.89	2637.58	0	4788.67
17109_6601_x4384_y7436	8043.73	1633.75	2106.93	VISal	VISal	5	Gnb4-IRES2-CreERT2;Ai140_297974-17109	17109			0	0	0	0	6318.15	0	0	0	0	0	1493.38	0	0	169.47	0	238.799	0	10484.8	529.673	3421.86	25202.9	0	1505.55	274.252	0	0	0	0	0	0	0	0	0	0	0	0	0	0	667.6
17109_6601_x5417_y25287	8267.6	1502.43	2303.38	VISal	VISal	5	Gnb4-IRES2-CreERT2;Ai140_297974-17109	17109			0	0	0	0	667.519	0	0	0	0	0	0	0	0	0	0	0	0	5245.94	547.874	1155.73	6996.03	0	289.926	398.558	0	0	0	0	0	0	0	0	0	0	0	79.8405	0	0	249.544
17109_6801_x7432_y4405	8968.15	2950.9	1259.6	TEa	TEa	5	Gnb4-IRES2-CreERT2;Ai140_297974-17109	17109			0	0	0	0	626.093	0	0	0	349.122	0	0	0	447.88	0	0	1323.59	1517.39	783.939	468.764	6174.22	77216.2	11993.7	11945.2	3950.71	4866.75	0	0	0	0	0	0	0	0	1696.6	0	148.915	0	0	1827.59
17109_6901_x7203_y26714	8598.3	2227.38	1662.9	TEa	TEa	5	Gnb4-IRES2-CreERT2;Ai140_297974-17109	17109			0	0	0	0	139.916	0	0	0	674.716	0	308.193	0	0	2469.7	1792.97	1977.69	0	6462.74	8956.43	4731.17	32658.1	0	21430.1	4736.94	368.07	0	0	0	0	0	0	0	0	0	0	267.787	0	0	12612
17109_7001_x5738_y6470	8940.65	2164.62	2113.95	VISl	VISl	6a	Gnb4-IRES2-CreERT2;Ai140_297974-17109	17109			0	0	0	0	0	0	0	0	0	0	0	0	0	138.761	0	236.566	0	1331.48	449.484	14516.1	42806.6	2224.97	1595.02	1528.99	597.689	0	0	0	0	0	0	0	0	0	0	1867.52	611.058	0	747.097
17109_7001_x6205_y5194	8856.08	2377.05	1507.72	TEa	TEa	4	Gnb4-IRES2-CreERT2;Ai140_297974-17109	17109			0	991.7	1305.21	0	0	0	0	0	2531.66	0	564.792	0	0	2076.28	892.803	1603.39	49.7701	0	409.885	5527.13	5021.22	0	1255.68	3739.43	921.408	0	0	0	0	0	0	0	0	0	0	3589.03	1628.81	0	266.238
17300_3426_x20339_y44872	5190.75	3477.62	1760.2	SSs	SSs	5	Plxnd1-CreER;Ai82;Ai140_314107-17300	17300			29.962	21464.4	16944.5	0	0	0	8856	0	0	0	19170.5	0	0	0	0	0	0	0	0	0	0	0	0	0	0	0	419.717	0	0	0	0	0	358.47	0	0	0	0	0	0
17300_3514_x19676_y45282	5320.95	3629.57	1657.47	SSs	SSs	5	Plxnd1-CreER;Ai82;Ai140_314107-17300	17300			1372.18	7281.58	6096.71	0	0	0	6141.52	0	0	0	14383.7	0	0	0	0	0	0	0	0	0	0	0	0	0	0	0	449.202	0	0	425.837	0	289.692	138.332	0	0	0	0	0	0
17300_5571_x27063_y39610	7653.85	826.125	3222.12	VISa	VISa	2/3	Plxnd1-CreER;Ai82;Ai140_314107-17300	17300			0	280.473	10762.4	0	2042.94	0	0	0	1544.3	0	0	0	0	304.281	0	1523.36	0	1002.86	2894.64	0	1767.8	0	0	0	0	6602.97	0	0	0	0	0	0	0	0	0	3194.43	7054.02	865.012	9686.75
17300_5896_x24862_y27320	8084.88	1380.47	5343.5	RSPv	RSPv	5	Plxnd1-CreER;Ai82;Ai140_314107-17300	17300			0	0	0	0	0	0	0	0	0	0	0	0	0	0	0	0	0	0	0	0	0	0	0	0	0	0	3181.35	588.977	98.7178	0	0	0	0	0	0	635.832	2371.9	25847.8	0
17300_5969_x27278_y20820	8002.25	652.2	3835.57	VISpm	VISp	5	Plxnd1-CreER;Ai82;Ai140_314107-17300	17300			0	249.539	0	0	869.645	259.562	0	0	669.361	0	0	0	0	0	0	0	0	960.825	12839.4	1765.47	6401.29	635.237	5808.88	767.388	69.8349	0	1033.53	0	0	0	0	0	0	0	0	1691.95	4468.53	1008.81	2176.19
17300_6010_x23413_y13446	8146.75	1721.45	1893.32	VISal	VISal	4	Plxnd1-CreER;Ai82;Ai140_314107-17300	17300			0	0	0	0	733.097	0	0	0	0	0	998.468	0	0	1328.27	0	585.039	0	11233.1	206.037	1743.64	4146.29	0	3237.26	837.912	1052.03	0	0	0	0	0	0	0	0	0	0	1917.24	535.83	409.775	0
17302_00001	4912.75	4900.88	2445.78	CLA	CP	6a	Tnnt1-IRES2-CreERT2;Ai82;Ai140_321237-17302	17302	CP_SNr		0	0	0	0	0	0	0	0	0	0	0	0	0	0	0	0	0	0	0	0	0	0	0	0	0	0	0	0	0	0	0	0	148.987	0	20.0024	0	0	0	0
17302_00002	4815.65	4976.62	2421.28	CLA	CP	unknown	Tnnt1-IRES2-CreERT2;Ai82;Ai140_321237-17302	17302	CP_SNr		0	0	0	0	0	0	0	0	0	0	0	0	0	0	0	0	0	0	0	0	0	0	0	0	0	0	0	0	0	0	0	0	78.8254	0	0	0	0	0	0
17302_00003	4908.25	4910.88	2340.62	CLA	CP	unknown	Tnnt1-IRES2-CreERT2;Ai82;Ai140_321237-17302	17302	CP_SNr		0	0	0	0	0	0	0	0	0	0	0	0	0	0	0	0	0	0	0	0	0	0	0	0	0	0	0	0	0	0	0	0	108.173	0	0	0	0	0	0
17302_00005	4749.45	4608.62	2777.4	CP	CP	unknown	Tnnt1-IRES2-CreERT2;Ai82;Ai140_321237-17302	17302	CP_SNr		0	0	0	0	0	0	0	0	0	0	0	0	0	0	0	0	0	0	0	0	0	0	0	0	0	0	0	0	0	0	0	0	79.9969	0	0	0	0	0	0
17302_00006	4967.48	4418.42	2691.03	CP	CP	unknown	Tnnt1-IRES2-CreERT2;Ai82;Ai140_321237-17302	17302	CP_SNr		0	0	0	0	0	0	0	0	0	0	0	0	0	0	0	0	0	0	0	0	0	0	0	0	0	0	0	0	0	0	0	0	62.6804	0	0	0	0	0	0
17302_00007	5030.88	4426.55	2712.4	CP	CP	unknown	Tnnt1-IRES2-CreERT2;Ai82;Ai140_321237-17302	17302	CP_SNr		0	0	0	0	0	0	0	0	0	0	0	0	0	0	0	0	0	0	0	0	0	0	0	0	0	0	0	0	0	0	0	0	0	0	0	0	0	0	0
17302_00009	4938.08	4175.05	2783.75	CP	CP	unknown	Tnnt1-IRES2-CreERT2;Ai82;Ai140_321237-17302	17302	CP_SNr		0	0	0	0	0	0	0	0	0	0	0	0	0	0	0	0	0	0	0	0	0	0	0	0	0	0	0	0	0	0	0	0	0	0	0	0	0	0	0
17302_00010	5068.48	3987.55	2783.28	CP	CP	unknown	Tnnt1-IRES2-CreERT2;Ai82;Ai140_321237-17302	17302	CP_SNr		0	0	0	0	0	0	0	0	0	0	0	0	0	0	0	0	0	0	0	0	0	0	0	0	0	0	0	0	0	0	0	0	0	0	0	0	0	0	0
17302_00011	5057.7	4183.52	2675.8	CP	CP	unknown	Tnnt1-IRES2-CreERT2;Ai82;Ai140_321237-17302	17302	CP_SNr		0	0	0	0	0	0	0	0	0	0	0	0	0	0	0	0	0	0	0	0	0	0	0	0	0	0	0	0	0	0	0	0	0	0	0	0	0	0	0
17302_00013	4972.92	4085.52	2721.95	CP	CP	unknown	Tnnt1-IRES2-CreERT2;Ai82;Ai140_321237-17302	17302	CP_others		0	0	0	0	0	0	0	0	0	0	0	0	0	0	0	0	0	0	0	0	0	0	0	0	0	0	0	0	0	0	0	0	0	0	0	0	0	0	0
17302_00014	4755.42	3941.15	2653	CP	CP	unknown	Tnnt1-IRES2-CreERT2;Ai82;Ai140_321237-17302	17302	CP_others		0	0	0	0	0	0	1071.78	0	0	0	0	2423.21	0	0	0	0	0	0	0	0	0	0	0	0	0	0	0	0	0	0	0	0	541.631	0	0	0	0	0	0
17302_00015	5260.2	3842.1	2569.15	CP	CP	unknown	Tnnt1-IRES2-CreERT2;Ai82;Ai140_321237-17302	17302	CP_others		0	0	0	0	0	0	812.09	0	0	0	0	964.796	0	0	0	0	0	0	0	0	0	0	0	0	0	0	0	0	0	0	0	0	0	0	0	0	0	0	0
17302_00016	5203	3547.6	2633.28	CP	CP	unknown	Tnnt1-IRES2-CreERT2;Ai82;Ai140_321237-17302	17302	CP_GPe		0	0	0	0	0	0	205.135	0	0	0	0	0	0	0	0	0	0	0	0	0	0	0	0	0	0	0	0	0	0	0	0	0	0	0	0	0	0	0	0
17302_00017	6709.42	4386.58	2114.17	CP	CP	unknown	Tnnt1-IRES2-CreERT2;Ai82;Ai140_321237-17302	17302	CP_GPe		0	0	0	0	0	0	0	0	0	0	0	0	0	0	0	0	0	0	0	0	0	0	0	0	0	0	0	0	0	0	0	0	0	0	0	0	0	0	0
17302_00018	5018.85	5249.77	2880.72	CP	CP	unknown	Tnnt1-IRES2-CreERT2;Ai82;Ai140_321237-17302	17302	CP_GPe		0	0	0	0	0	0	0	0	0	0	0	0	0	0	0	0	0	0	0	0	0	0	0	0	0	0	0	0	0	0	0	0	0	0	0	0	0	0	0
17302_00020	6668.58	4870.65	4084.92	VAL	VPL	unknown	Tnnt1-IRES2-CreERT2;Ai82;Ai140_321237-17302	17302	TH_core		0	12960.9	0	0	0	0	19561.6	0	0	0	0	0	0	0	0	0	0	0	0	0	0	0	0	0	0	0	0	0	0	0	0	0	0	0	0	0	0	0	0
17302_00021	6569.6	4656.42	4118.52	VPM	VPL	unknown	Tnnt1-IRES2-CreERT2;Ai82;Ai140_321237-17302	17302	TH_core		0	13772.4	1131.06	0	0	0	7469.58	0	0	0	0	0	0	0	0	0	0	0	0	0	0	0	0	0	0	0	0	0	0	0	0	0	0	0	0	0	0	0	0
17302_00023	6368.98	4632.73	5263.88	AM	AM	unknown	Tnnt1-IRES2-CreERT2;Ai82;Ai140_321237-17302	17302	TH_core		0	0	0	0	0	0	0	0	0	0	0	0	0	0	0	0	0	0	0	0	0	0	0	0	0	0	0	0	0	4087.21	0	30866.7	0	0	0	0	0	0	0
17302_00024	5800.15	4633.58	5540.02	PT	PVT	unknown	Tnnt1-IRES2-CreERT2;Ai82;Ai140_321237-17302	17302	TH_matrix		0	0	0	0	0	0	0	0	0	0	0	0	0	0	0	0	0	0	0	0	0	0	0	0	0	0	0	0	0	0	0	0	0	0	0	0	0	0	0
17302_00025	6125.83	4106.2	5479.45	PT	MD	unknown	Tnnt1-IRES2-CreERT2;Ai82;Ai140_321237-17302	17302	TH_matrix	anterior MD	969.911	0	0	0	0	0	0	0	0	0	0	0	0	0	0	0	0	0	0	0	0	0	0	0	0	287.31	0	1965.37	269.698	1897.6	9096.82	20709.6	1174.35	0	128.733	0	0	0	0
17302_00027	4990.9	4004.73	2847.95	CP	CP	unknown	Tnnt1-IRES2-CreERT2;Ai82;Ai140_321237-17302	17302	CP_SNr		0	0	0	0	0	0	0	0	0	0	0	0	0	0	0	0	0	0	0	0	0	0	0	0	0	0	0	0	0	0	0	0	0	0	0	0	0	0	0
17302_00030	4218.75	4237.3	3266.15	CP	CP	unknown	Tnnt1-IRES2-CreERT2;Ai82;Ai140_321237-17302	17302	CP_GPe		0	968.842	0	0	0	0	234.879	0	0	0	0	130.007	0	0	0	0	0	0	0	0	0	0	0	0	0	0	0	0	0	0	0	0	1405.92	0	48.7325	0	0	0	0
17302_00031	5194.33	3788.32	3023.1	CP	CP	unknown	Tnnt1-IRES2-CreERT2;Ai82;Ai140_321237-17302	17302	CP_SNr		0	0	0	0	0	0	0	0	0	0	0	0	0	0	0	0	0	0	0	0	0	0	0	0	0	0	0	0	0	0	0	0	0	0	0	0	0	0	0
17302_00032	4486.38	3788.45	2910.5	fiber tracts	CP	unknown	Tnnt1-IRES2-CreERT2;Ai82;Ai140_321237-17302	17302	CP_others		0	150.689	0	0	0	0	263.845	0	0	0	0	0	0	0	0	0	0	0	0	0	0	0	0	0	0	0	0	0	0	0	0	0	0	0	0	0	0	0	0
17302_00033	3988.98	4097.85	3785.25	CP	CP	unknown	Tnnt1-IRES2-CreERT2;Ai82;Ai140_321237-17302	17302	CP_GPe		0	0	0	0	0	0	0	0	0	0	0	0	0	0	0	0	0	0	0	0	0	0	0	0	0	0	0	0	0	0	0	0	0	0	0	0	0	0	0
17302_00035	8310.2	3935.6	3721.45	MG	MG	unknown	Tnnt1-IRES2-CreERT2;Ai82;Ai140_321237-17302	17302	TH_core		0	0	0	0	0	0	0	0	0	0	0	0	478.706	0	22314.8	0	3493.86	0	0	0	0	0	0	0	0	0	0	0	0	0	0	0	0	0	0	0	0	0	0
17302_00036	8154.42	3756.5	3597.48	MG	MG	unknown	Tnnt1-IRES2-CreERT2;Ai82;Ai140_321237-17302	17302	TH_core	single target	0	0	0	0	0	0	0	0	0	0	239.699	0	0	99.7224	23315.6	5326.53	468.663	0	0	0	0	0	0	0	0	0	0	0	0	0	0	0	0	0	0	0	0	0	0
17302_00037	7026.35	3690.85	3451.17	VPM	LGd	unknown	Tnnt1-IRES2-CreERT2;Ai82;Ai140_321237-17302	17302	TH_core		0	0	0	0	17014	0	0	0	0	0	641.772	0	0	1001.91	0	0	0	206.298	0	0	0	0	0	0	0	0	0	0	0	0	0	0	0	0	0	0	0	0	0
17302_00038	8388.17	3522.8	3365.7	MG	MG	unknown	Tnnt1-IRES2-CreERT2;Ai82;Ai140_321237-17302	17302	TH_core		0	0	0	0	0	0	0	0	0	0	0	0	0	0	23256.6	99.2203	701.536	0	0	0	0	0	0	0	0	0	0	0	0	0	0	0	0	0	0	0	0	0	0
17302_00039	7607.55	3092.12	3557.83	LGd	LGd	unknown	Tnnt1-IRES2-CreERT2;Ai82;Ai140_321237-17302	17302	TH_core		0	0	0	0	378.576	0	0	0	0	0	446.458	0	0	0	0	0	0	0	0	0	32318.3	0	0	0	0	0	0	0	0	0	0	0	0	0	0	0	0	0	0
17302_00040	7879.48	3105.57	3708.98	LP	LGd	unknown	Tnnt1-IRES2-CreERT2;Ai82;Ai140_321237-17302	17302	TH_core		0	0	0	0	0	0	0	0	0	0	0	0	0	0	0	0	0	0	0	189.761	32432.4	299.57	0	349.563	299.408	0	0	0	0	0	0	0	0	0	0	0	0	0	0
17302_00041	7828.45	3074.02	3610.65	LGd	LGd	unknown	Tnnt1-IRES2-CreERT2;Ai82;Ai140_321237-17302	17302	TH_core		0	0	0	0	0	0	0	0	0	0	0	0	0	0	926.834	478.035	0	169.775	0	610.446	23123	0	0	169.923	0	0	0	0	0	0	0	0	0	0	0	0	0	0	0
17302_00043	5674.48	3136.9	3078.75	CP	CP	unknown	Tnnt1-IRES2-CreERT2;Ai82;Ai140_321237-17302	17302	CP_GPe		0	0	0	0	0	0	0	0	0	0	0	0	0	0	0	0	0	0	0	0	0	0	0	0	0	0	0	0	0	0	0	0	0	0	0	0	0	0	0
17302_00044	5047.1	3168.93	3123.85	CP	CP	unknown	Tnnt1-IRES2-CreERT2;Ai82;Ai140_321237-17302	17302	CP_GPe		0	402.883	0	0	0	0	636.521	0	0	0	0	0	0	0	0	0	0	0	0	0	0	0	0	0	0	0	0	0	0	0	0	0	0	0	0	0	0	0	0
17302_00045	5121.65	3214.8	3270.42	CP	CP	unknown	Tnnt1-IRES2-CreERT2;Ai82;Ai140_321237-17302	17302	CP_GPe		0	0	0	0	0	0	168.438	0	0	0	0	0	0	0	0	0	0	0	0	0	0	0	0	0	0	0	0	0	0	0	0	0	0	0	0	0	0	0	0
17302_00046	5999.6	2829.62	3020.3	CP	CP	unknown	Tnnt1-IRES2-CreERT2;Ai82;Ai140_321237-17302	17302	CP_GPe		0	0	0	0	0	0	0	0	0	0	0	0	0	0	0	0	0	0	0	0	0	0	0	0	0	0	0	0	0	0	0	0	0	0	0	0	0	0	0
17302_00047	5507.33	2567.95	3381.35	fiber tracts	CP	unknown	Tnnt1-IRES2-CreERT2;Ai82;Ai140_321237-17302	17302	CP_others		0	0	0	9.99722	0	0	0	254.175	0	0	0	0	0	0	0	0	0	0	0	0	0	0	0	0	0	0	0	0	0	0	0	0	0	0	0	0	0	0	0
17302_00048	7283.67	2852.05	3534.6	LGd	LGd	unknown	Tnnt1-IRES2-CreERT2;Ai82;Ai140_321237-17302	17302	TH_core		0	0	0	0	0	0	0	0	0	0	0	0	0	0	0	0	0	0	0	0	15334.6	729.783	0	0	608.98	0	0	0	0	0	0	0	0	0	0	650.026	0	0	0
17302_00049	7620.73	2915.52	3617.62	LGd	LGd	unknown	Tnnt1-IRES2-CreERT2;Ai82;Ai140_321237-17302	17302	TH_core		0	0	0	0	0	0	0	0	0	0	0	0	0	0	39.9874	99.7886	0	0	0	607.691	21786.1	0	0	329.723	0	0	0	0	0	0	0	0	0	0	0	0	0	0	0
17302_00050	4644.7	3842.45	3955.73	CP	CP	unknown	Tnnt1-IRES2-CreERT2;Ai82;Ai140_321237-17302	17302	CP_GPe		0	0	0	0	0	0	0	0	0	0	0	0	0	0	0	0	0	0	0	0	0	0	0	0	0	0	0	0	0	136.503	0	0	0	0	0	0	0	0	0
17302_00052	8289.25	3462	3807.4	SGN	MG	unknown	Tnnt1-IRES2-CreERT2;Ai82;Ai140_321237-17302	17302	TH_core		0	0	0	0	0	0	0	0	0	0	99.0941	0	1089.02	0	8176.7	0	15384.8	0	0	0	0	0	0	0	0	0	0	0	0	0	0	0	0	349.124	0	0	0	0	0
17302_00053	6642.67	4085.43	4045.83	VPM	VPM	unknown	Tnnt1-IRES2-CreERT2;Ai82;Ai140_321237-17302	17302	TH_core		0	0	0	0	0	0	29921.3	0	0	129.835	2430.33	0	0	0	0	0	0	0	0	0	0	0	0	0	0	0	0	0	0	0	0	0	0	0	0	0	0	0	0
17302_00054	7122.5	4139.1	4442.95	PO	VPM	unknown	Tnnt1-IRES2-CreERT2;Ai82;Ai140_321237-17302	17302	TH_core		0	917.768	0	0	0	0	9494.78	0	0	0	55384.6	0	0	0	0	0	0	0	0	0	0	0	0	0	0	0	0	0	0	0	0	0	0	0	0	0	0	0	0
17302_00055	5317.62	2906.55	3749.67	CP	CP	unknown	Tnnt1-IRES2-CreERT2;Ai82;Ai140_321237-17302	17302	CP_others		0	0	0	0	0	0	0	0	0	0	0	0	0	0	0	0	0	0	0	0	0	0	0	0	0	0	0	0	0	0	0	0	0	0	0	0	0	0	0
17302_00056	5177.62	2803.8	3577.65	CP	CP	unknown	Tnnt1-IRES2-CreERT2;Ai82;Ai140_321237-17302	17302	CP_GPe		0	0	0	0	0	0	0	0	0	0	0	0	0	0	0	0	0	0	0	0	0	0	0	0	0	0	0	0	0	0	0	0	0	0	0	0	0	0	0
17302_00057	4875.62	2822.12	3815.5	fiber tracts	CP	unknown	Tnnt1-IRES2-CreERT2;Ai82;Ai140_321237-17302	17302	CP_GPe		0	0	0	0	0	0	0	0	0	0	0	0	0	0	0	0	0	0	0	0	0	0	0	0	0	0	0	0	0	0	0	0	0	0	0	0	0	0	0
17302_00059	4620.73	3068.45	4230.92	CP	CP	unknown	Tnnt1-IRES2-CreERT2;Ai82;Ai140_321237-17302	17302	CP_GPe		0	0	0	0	0	0	0	0	0	0	0	0	0	0	0	0	0	0	0	0	0	0	0	0	0	0	0	0	0	0	0	0	0	0	0	0	0	0	0
17302_00062	5372.7	2636.82	4108.1	CP	CP	unknown	Tnnt1-IRES2-CreERT2;Ai82;Ai140_321237-17302	17302	CP_GPe		0	0	0	0	0	0	0	0	0	0	0	0	0	0	0	0	0	0	0	0	0	0	0	0	0	0	0	0	0	0	0	0	0	0	0	0	0	0	0
17302_00063	5265.58	2502.18	4319.2	fiber tracts	CP	unknown	Tnnt1-IRES2-CreERT2;Ai82;Ai140_321237-17302	17302	CP_GPe		0	0	0	0	0	0	0	0	0	0	0	0	0	0	0	0	0	0	0	0	0	0	0	0	0	0	0	0	0	0	0	0	0	0	0	0	0	0	0
17302_00064	7242.7	2798.82	3697.52	unknown	LGd	unknown	Tnnt1-IRES2-CreERT2;Ai82;Ai140_321237-17302	17302	TH_core		0	0	0	0	0	0	0	0	0	0	0	0	0	0	0	0	0	0	0	0	447.962	821.434	0	0	769.814	0	0	0	0	0	0	0	0	0	0	7799.05	6568.19	0	0
17302_00065	7184.2	2807.25	3765.33	LP	LGd	unknown	Tnnt1-IRES2-CreERT2;Ai82;Ai140_321237-17302	17302	TH_core		0	0	0	0	0	0	0	0	0	0	0	0	0	0	658.018	229.867	0	0	0	589.352	1178.77	0	0	379.557	0	0	0	0	0	0	0	0	0	0	0	3006	18177.3	0	0
17302_00066	7618.3	2869.25	3732.75	LP	LGd	unknown	Tnnt1-IRES2-CreERT2;Ai82;Ai140_321237-17302	17302	TH_core		0	0	0	0	0	0	0	0	0	0	0	0	0	0	328.391	327.63	0	0	0	591.102	23900.5	0	0	379.568	0	0	0	0	0	0	0	0	0	0	0	0	0	0	0
17302_00074	4727.73	4611.5	4060.62	CP	CP	unknown	Tnnt1-IRES2-CreERT2;Ai82;Ai140_321237-17302	17302	CP_GPe		0	0	0	0	0	0	0	0	0	0	0	0	0	0	0	0	0	0	0	0	0	0	0	0	0	0	0	0	0	0	0	0	0	0	0	0	0	0	0
17302_00075	5095.92	4474.58	2839.68	CP	CP	unknown	Tnnt1-IRES2-CreERT2;Ai82;Ai140_321237-17302	17302	CP_others		0	0	0	0	0	0	0	0	0	0	0	0	0	0	0	0	0	0	0	0	0	0	0	0	0	0	0	0	0	0	0	0	29.8642	0	0	0	0	0	0
17302_00076	8003.02	4318.58	3581.7	ZI	MG	unknown	Tnnt1-IRES2-CreERT2;Ai82;Ai140_321237-17302	17302	TH_core		0	0	0	0	0	0	0	0	0	0	887.422	0	0	1816.58	12552.9	0	0	0	0	0	0	0	0	0	0	0	0	0	0	0	0	0	0	0	0	0	0	0	0
17302_00077	7963.73	4282.17	3545.12	ZI	MG	unknown	Tnnt1-IRES2-CreERT2;Ai82;Ai140_321237-17302	17302	TH_core		0	0	0	0	0	0	0	0	0	0	169.862	0	0	6220.73	10645	0	419.739	0	0	0	0	0	0	0	0	0	0	0	0	0	0	0	0	0	0	0	0	0	0
17302_00078	7424.52	4148.42	3235.62	fiber tracts	VPL	unknown	Tnnt1-IRES2-CreERT2;Ai82;Ai140_321237-17302	17302	TH_core		0	0	0	0	3248.56	0	0	0	0	0	1519.83	0	0	0	0	0	0	605.867	0	0	0	0	0	0	0	0	0	0	0	0	0	0	0	0	0	0	0	0	0
17302_00079	8294	4170.88	3329.85	MG	MG	unknown	Tnnt1-IRES2-CreERT2;Ai82;Ai140_321237-17302	17302	TH_core		0	0	0	0	0	0	0	0	0	0	0	0	0	128.893	21704.5	7746.75	1773.91	0	0	0	0	0	0	0	0	0	0	0	0	0	0	0	0	0	0	0	0	0	0
17302_00080	7961.2	4256.52	3248.65	ZI	LGd	unknown	Tnnt1-IRES2-CreERT2;Ai82;Ai140_321237-17302	17302	TH_core		0	0	0	0	1234.74	0	0	0	0	0	314.348	0	0	0	0	0	0	0	0	0	32992.7	0	0	0	0	0	0	0	0	0	0	0	0	0	0	0	0	0	0
17302_00081	5118.25	5085.1	2401.23	fiber tracts	CP	unknown	Tnnt1-IRES2-CreERT2;Ai82;Ai140_321237-17302	17302	CP_others		0	0	0	0	0	0	0	0	0	0	0	0	0	0	0	0	0	0	0	0	0	0	0	0	0	0	0	0	0	0	0	0	0	323.176	0	0	0	0	0
17302_00085	5538.1	4461.6	2553.55	CP	CP	unknown	Tnnt1-IRES2-CreERT2;Ai82;Ai140_321237-17302	17302	CP_GPe		0	0	0	0	0	0	0	0	0	0	49.2292	79.9687	0	0	0	0	0	0	0	0	0	0	0	0	0	0	0	0	0	0	0	0	0	38.5928	0	0	0	0	0
17302_00086	5071.2	4402.1	2621.4	CP	CP	unknown	Tnnt1-IRES2-CreERT2;Ai82;Ai140_321237-17302	17302	CP_SNr		0	0	0	0	0	0	0	0	0	0	0	0	0	0	0	0	0	0	0	0	0	0	0	0	0	0	0	0	0	0	0	0	0	0	0	0	0	0	0
17302_00087	4892.48	4515.52	2420.52	GU	CP	unknown	Tnnt1-IRES2-CreERT2;Ai82;Ai140_321237-17302	17302	CP_others		0	0	0	0	0	0	0	0	0	0	0	3.98634	0	0	0	0	0	0	0	0	0	0	0	0	0	0	0	0	0	0	0	0	0	0	0	0	0	0	0
17302_00091	5245.8	3841.52	2671.7	CP	CP	unknown	Tnnt1-IRES2-CreERT2;Ai82;Ai140_321237-17302	17302	CP_GPe		0	0	0	0	0	0	492.568	0	0	0	119.514	900.341	0	0	0	0	0	0	0	0	0	0	0	0	0	0	0	0	0	0	0	0	0	0	0	0	0	0	0
17302_00093	5083.85	4453.45	2463.25	CP	CP	unknown	Tnnt1-IRES2-CreERT2;Ai82;Ai140_321237-17302	17302	CP_SNr		0	0	0	0	0	0	0	0	0	0	0	38.7143	0	0	0	0	0	0	0	0	0	0	0	0	0	0	0	0	0	0	0	0	0	0	0	0	0	0	0
17302_00094	5002.8	4479.3	2424.15	CP	CP	unknown	Tnnt1-IRES2-CreERT2;Ai82;Ai140_321237-17302	17302	CP_SNr		0	0	0	0	0	0	0	0	0	0	0	133.953	0	0	0	0	0	0	0	0	0	0	0	0	0	0	0	0	0	0	0	0	0	0	0	0	0	0	0
17302_00095	5049.38	4359.95	2477.93	CP	CP	unknown	Tnnt1-IRES2-CreERT2;Ai82;Ai140_321237-17302	17302	CP_SNr		0	0	0	0	0	0	0	0	0	0	0	0	0	0	0	0	0	0	0	0	0	0	0	0	0	0	0	0	0	0	0	0	0	0	0	0	0	0	0
17302_00096	4826.25	4428.38	2357.8	GU	CP	6a	Tnnt1-IRES2-CreERT2;Ai82;Ai140_321237-17302	17302	CP_GPe		0	0	0	0	0	0	952.631	0	0	0	1886.11	4088.63	0	0	0	0	0	0	0	0	0	0	0	0	0	0	0	0	0	0	0	0	409.301	0	0	0	0	0	0
17302_00097	5047.05	4389.52	2358	CP	CP	unknown	Tnnt1-IRES2-CreERT2;Ai82;Ai140_321237-17302	17302	CP_SNr		0	0	0	0	0	0	0	0	0	0	0	0	0	0	0	0	0	0	0	0	0	0	0	0	0	0	0	0	0	0	0	0	0	0	0	0	0	0	0
17302_00098	5008.85	3916.82	2565.68	CP	CP	unknown	Tnnt1-IRES2-CreERT2;Ai82;Ai140_321237-17302	17302	CP_GPe		0	0	0	0	0	0	39.9107	0	0	0	418.878	2466.08	0	0	0	0	0	0	0	0	0	0	0	0	0	0	0	0	0	0	0	0	0	0	0	0	0	0	0
17302_00099	6668.9	4242.4	2242.4	CP	CP	unknown	Tnnt1-IRES2-CreERT2;Ai82;Ai140_321237-17302	17302	CP_GPe		0	0	0	0	0	0	0	0	0	0	0	0	0	0	0	0	0	0	0	0	0	0	0	0	0	0	0	0	0	0	0	0	0	0	0	0	0	0	0
17302_00101	4780.85	3052.05	4340	CP	CP	unknown	Tnnt1-IRES2-CreERT2;Ai82;Ai140_321237-17302	17302	CP_GPe		0	0	0	0	0	0	0	0	0	0	0	0	0	0	0	0	0	0	0	0	0	0	0	0	0	0	0	0	0	0	0	0	0	0	0	0	0	0	0
17302_00102	4431.27	2925.4	3880.3	fiber tracts	CP	unknown	Tnnt1-IRES2-CreERT2;Ai82;Ai140_321237-17302	17302	CP_others		0	80.0062	0	0	0	0	0	0	0	0	0	0	0	0	0	0	0	0	0	0	0	0	0	0	0	0	0	0	0	0	0	0	0	0	0	0	0	0	0
17302_00103	5784.5	2244.65	3949.75	fiber tracts	CP	unknown	Tnnt1-IRES2-CreERT2;Ai82;Ai140_321237-17302	17302	CP_GPe		0	0	0	0	0	0	0	267.651	0	0	0	0	0	0	0	0	0	0	0	0	0	0	0	0	0	0	0	0	0	0	0	0	0	0	0	0	0	0	0
17302_00105	4094.38	3904.75	3507.4	CP	CP	unknown	Tnnt1-IRES2-CreERT2;Ai82;Ai140_321237-17302	17302	CP_GPe		0	135.901	0	0	0	0	0	0	0	0	0	0	0	0	0	0	0	0	0	0	0	0	0	0	0	0	0	0	0	0	0	0	0	0	0	0	0	0	0
17302_00106	5179.83	2999.65	3819.62	CP	CP	unknown	Tnnt1-IRES2-CreERT2;Ai82;Ai140_321237-17302	17302	CP_GPe		0	0	0	0	0	0	0	0	0	0	0	0	0	0	0	0	0	0	0	0	0	0	0	0	0	0	0	0	0	0	0	0	0	0	0	0	0	0	0
17302_00108	4642.88	3586.55	3001.9	CP	CP	unknown	Tnnt1-IRES2-CreERT2;Ai82;Ai140_321237-17302	17302	CP_others		0	0	0	0	0	0	138.104	0	0	0	0	0	0	0	0	0	0	0	0	0	0	0	0	0	0	0	0	0	0	0	0	0	0	0	0	0	0	0	0
17302_00110	5057.98	3206.93	3336.85	CP	CP	unknown	Tnnt1-IRES2-CreERT2;Ai82;Ai140_321237-17302	17302	CP_GPe		0	0	0	0	0	0	0	0	0	0	0	0	0	0	0	0	0	0	0	0	0	0	0	0	0	0	0	0	0	0	0	0	0	0	0	0	0	0	0
17302_00112	7131.2	4042.15	3576.05	VPM	VPM	unknown	Tnnt1-IRES2-CreERT2;Ai82;Ai140_321237-17302	17302	TH_core	small arbor, single	0	0	0	0	23812	0	0	0	0	0	454.789	0	0	0	0	0	0	0	0	0	0	0	0	0	0	0	0	0	0	0	0	0	0	0	0	0	0	0	0
17302_00113	6678.83	3612.9	3498.7	RT	VPM	unknown	Tnnt1-IRES2-CreERT2;Ai82;Ai140_321237-17302	17302	TH_core		0	0	0	0	37325.6	0	0	56.795	0	3805.15	0	0	0	0	0	0	0	0	0	0	0	0	0	0	0	0	0	0	0	0	0	0	0	0	0	0	0	0	0
17302_00114	6950.4	4001.68	3379.3	VPM	VPM	unknown	Tnnt1-IRES2-CreERT2;Ai82;Ai140_321237-17302	17302	TH_core		0	0	0	0	19631.6	0	0	0	0	0	0	0	0	0	0	0	0	0	0	0	0	0	0	0	0	0	0	0	0	0	0	0	0	0	0	0	0	0	0
17302_00115	7192.17	4053.57	3426.43	VPM	VPM	unknown	Tnnt1-IRES2-CreERT2;Ai82;Ai140_321237-17302	17302	TH_core		0	0	0	0	20200.6	0	0	0	0	0	298.42	0	0	0	0	0	0	0	0	0	0	0	0	0	0	0	0	0	0	0	0	0	0	0	0	0	0	0	0
17302_00116	7378.25	4097.92	3393.15	VPL	VPL	unknown	Tnnt1-IRES2-CreERT2;Ai82;Ai140_321237-17302	17302	TH_core		0	0	0	0	3632.54	0	0	0	0	0	11352.9	0	0	0	0	0	0	0	0	0	0	0	0	0	0	0	0	0	0	0	0	0	0	0	0	0	0	0	0
17302_00117	7270.38	3037.98	3256.93	LGd	LGd	unknown	Tnnt1-IRES2-CreERT2;Ai82;Ai140_321237-17302	17302	TH_core		0	0	0	0	0	0	0	0	0	0	861.389	0	0	0	0	0	0	708.71	0	79.692	60438.5	0	220.144	0	0	0	0	0	0	0	0	0	0	0	0	0	0	0	0
17302_00118	7767.67	3860.77	2991.12	LGv	LGd	unknown	Tnnt1-IRES2-CreERT2;Ai82;Ai140_321237-17302	17302	TH_core		0	0	0	0	0	0	0	0	0	0	0	0	0	0	1208.14	309.65	49.987	0	0	749.452	23668.9	159.087	0	479.103	0	0	0	0	0	0	0	0	0	0	0	0	0	0	0
17302_00119	7678.4	3014.35	3556.98	LGd	LGd	unknown	Tnnt1-IRES2-CreERT2;Ai82;Ai140_321237-17302	17302	TH_core		0	0	0	0	0	0	0	0	0	0	0	0	0	0	0	49.9041	1363.48	0	0	15159.4	11230.9	1081.82	0	0	744.778	0	0	0	0	0	0	0	0	0	0	0	0	0	0
17302_00120	7571.62	2933.3	3536.88	LGd	LGd	unknown	Tnnt1-IRES2-CreERT2;Ai82;Ai140_321237-17302	17302	TH_core		0	0	0	0	0	0	0	0	0	0	0	0	0	1422.63	0	0	0	489.011	0	1033.55	829.751	19271.2	0	0	0	0	0	0	0	0	0	0	0	0	0	0	0	0	0
17302_00121	7452.4	2884.6	3605.45	LGd	LGd	unknown	Tnnt1-IRES2-CreERT2;Ai82;Ai140_321237-17302	17302	TH_core		0	0	0	0	0	0	0	0	0	0	0	0	0	0	0	0	0	0	0	0	9654.19	10647.3	0	0	452.626	0	0	0	0	0	0	0	0	0	0	0	0	0	0
17302_00123	4766.35	2864.23	3778.23	fiber tracts	CP	unknown	Tnnt1-IRES2-CreERT2;Ai82;Ai140_321237-17302	17302	CP_GPe		0	0	0	0	0	0	0	0	0	0	0	0	0	0	0	0	0	0	0	0	0	0	0	0	0	0	0	0	0	0	0	0	0	0	0	0	0	0	0
17302_00124	5207.12	3124.45	2852.65	fiber tracts	CP	unknown	Tnnt1-IRES2-CreERT2;Ai82;Ai140_321237-17302	17302	CP_GPe		0	0	0	568.189	0	0	2295.98	0	0	0	0	0	0	0	0	0	0	0	0	0	0	0	0	0	0	0	0	0	0	0	0	0	0	0	0	0	0	0	0
17302_00125	7489.6	2984.52	3826.68	LP	LP	unknown	Tnnt1-IRES2-CreERT2;Ai82;Ai140_321237-17302	17302	TH_matrix	posterior LP	0	0	0	0	1327.39	0	0	0	0	0	79.6533	0	0	0	0	0	0	465.518	0	827.756	14279.7	0	0	1425.03	100.232	0	0	0	0	0	0	0	0	0	0	0	0	0	0
17543_00126	5181.62	4402.8	1571.45	VISC	VISC	5	Tlx3-Cre_PL56;Ai82;Ai161_325875-17543	17543			0	1324.09	0	0	0	0	16067.2	0	0	0	26125.6	5677.43	13087.3	0	0	0	0	0	0	0	0	0	0	0	0	0	0	0	0	0	0	0	0	59.9371	0	0	0	0	0
17543_00140	6323.88	1239.32	3556.75	SSp-ul	SSp-ul	5	Tlx3-Cre_PL56;Ai82;Ai161_325875-17543	17543			0	0	0	0	69.4043	6683.9	0	8777.55	0	6625.12	0	0	0	0	0	0	0	0	0	0	0	0	0	0	0	0	0	0	0	0	0	0	0	0	0	0	0	0	0
17543_2434_x11441_y5587	4795.83	2906.18	2043.4	SSp-m	SSp-m	4	Tlx3-Cre_PL56;Ai82;Ai161_325875-17543	17543			0	15759.4	89.2138	1021.49	0	0	23193.3	0	0	0	0	0	0	0	0	0	0	0	0	0	0	0	0	0	0	0	0	0	0	0	0	0	0	0	0	0	0	0	0
17543_3308_x10077_y3766	5441	3220.18	1693.6	SSs	SSp-m	4	Tlx3-Cre_PL56;Ai82;Ai161_325875-17543	17543			0	0	0	8033.81	0	0	6472.99	0	0	0	14687.4	0	0	0	0	0	0	0	0	0	0	0	0	0	0	0	0	0	0	0	0	0	0	0	0	0	0	0	0
17543_3471_x12087_y3637	5184.5	4404.98	1572.45	VISC	VISC	5	Tlx3-Cre_PL56;Ai82;Ai161_325875-17543	17543			0	466.033	0	0	0	0	17858.2	0	0	0	23608.5	5594.21	13434	0	0	0	0	0	0	0	0	0	0	0	0	0	0	0	0	0	0	0	0	29.9664	0	0	0	0	0
17543_3705_x9619_y20864	5109.52	3133.18	1755.17	SSp-m	SSs	4	Tlx3-Cre_PL56;Ai82;Ai161_325875-17543	17543			0	0	0	808.163	0	0	33081.6	0	0	0	6226.26	0	0	0	0	0	0	0	0	0	0	0	0	0	0	0	0	0	0	0	0	0	0	0	0	0	0	0	0
17543_3828_x6023_y17044	6251.02	1234.82	3573.2	SSp-ll	SSp-ll	4	Tlx3-Cre_PL56;Ai82;Ai161_325875-17543	17543			0	0	0	0	9.99445	9142.95	0	8152.92	0	5077.74	0	0	0	0	0	0	0	0	0	0	0	0	0	0	0	0	0	0	0	0	0	0	0	0	0	0	0	0	0
17543_3842_x7369_y3542	6613.7	1958.57	1822.65	SSp-bfd	SSp-bfd	2/3	Tlx3-Cre_PL56;Ai82;Ai161_325875-17543	17543			0	0	0	1087.79	37635.3	0	0	0	0	0	4070.51	0	0	0	0	0	0	0	0	0	0	0	0	0	0	0	0	0	0	0	0	0	0	0	0	0	0	0	0
17543_5296_x5131_y20385	8052.38	1724.65	2016.03	VISal	VISal	5	Tlx3-Cre_PL56;Ai82;Ai161_325875-17543	17543			0	0	0	0	868.533	0	0	0	338.282	0	1873.31	0	0	1182.11	0	0	0	18609.3	949.083	0	0	0	0	0	0	0	0	0	0	0	0	0	0	0	0	0	0	0	12574.9
17543_5334_x5066_y20381	8117.75	1711.03	2014.35	VISal	VISal	5	Tlx3-Cre_PL56;Ai82;Ai161_325875-17543	17543			0	0	0	0	831.353	0	0	0	0	0	7999.99	0	0	8033.87	0	0	0	31553.9	0	0	39.9609	0	388.786	0	0	0	0	0	0	0	0	0	0	0	0	0	0	0	4231.83
17545_00001	4948.52	5107.1	2709.92	CP	CP	unknown	Tnnt1-IRES2-CreERT2;Ai82;Ai140_321244-17545	17545	CP_others		0	0	0	0	0	0	0	0	0	0	0	0	0	0	0	0	0	0	0	0	0	0	0	0	0	0	0	0	0	0	0	0	0	0	0	0	0	0	0
17545_00003	7006.4	4802.05	3643.02	unknown	VPL	unknown	Tnnt1-IRES2-CreERT2;Ai82;Ai140_321244-17545	17545	TH_core		0	32291.3	0	1478.55	79.3989	0	1179.73	5437.13	0	59.7867	411.808	0	0	0	0	0	0	0	0	0	0	0	0	0	0	0	0	0	0	0	0	0	0	0	0	0	0	0	0
17545_00004	4772.35	4818.05	2798.5	CP	CP	unknown	Tnnt1-IRES2-CreERT2;Ai82;Ai140_321244-17545	17545	CP_GPe		0	0	0	0	0	0	0	0	0	0	0	0	0	0	0	0	0	0	0	0	0	0	0	0	0	0	0	0	0	0	0	0	0	0	0	0	0	0	0
17545_00006	4867.98	4514.7	2827.97	CP	CP	unknown	Tnnt1-IRES2-CreERT2;Ai82;Ai140_321244-17545	17545	CP_SNr		0	0	0	0	0	0	0	0	0	0	0	0	0	0	0	0	0	0	0	0	0	0	0	0	0	0	0	0	0	0	0	0	0	0	0	0	0	0	0
17545_00007	5021.45	4744.12	2825.65	CP	CP	unknown	Tnnt1-IRES2-CreERT2;Ai82;Ai140_321244-17545	17545	CP_GPe		0	0	0	0	0	0	0	0	0	0	0	0	0	0	0	0	0	0	0	0	0	0	0	0	0	0	0	0	0	0	0	0	0	0	0	0	0	0	0
17545_00008	5139.35	4720.83	2719	CP	CP	unknown	Tnnt1-IRES2-CreERT2;Ai82;Ai140_321244-17545	17545	CP_SNr		0	0	0	0	0	0	0	0	0	0	0	0	0	0	0	0	0	0	0	0	0	0	0	0	0	0	0	0	0	0	0	0	0	0	0	0	0	0	0
17545_00023	4975.45	4077.12	2600.5	CP	CP	unknown	Tnnt1-IRES2-CreERT2;Ai82;Ai140_321244-17545	17545	CP_GPe		0	0	0	0	0	0	0	0	0	0	0	0	0	0	0	0	0	0	0	0	0	0	0	0	0	0	0	0	0	0	0	0	0	0	0	0	0	0	0
17545_00024	5046.48	3900.85	2770	CP	CP	unknown	Tnnt1-IRES2-CreERT2;Ai82;Ai140_321244-17545	17545	CP_GPe		0	0	0	0	0	0	0	0	0	0	0	0	0	0	0	0	0	0	0	0	0	0	0	0	0	0	0	0	0	0	0	0	0	0	0	0	0	0	0
17545_00025	4833.92	3653.02	2907.75	CP	CP	unknown	Tnnt1-IRES2-CreERT2;Ai82;Ai140_321244-17545	17545	CP_GPe		0	0	0	0	0	0	0	0	0	0	0	0	0	0	0	0	0	0	0	0	0	0	0	0	0	0	0	0	0	0	0	0	0	0	0	0	0	0	0
17545_00026	5105.62	3742.38	2667.72	CP	CP	unknown	Tnnt1-IRES2-CreERT2;Ai82;Ai140_321244-17545	17545	CP_GPe		0	0	0	0	0	0	0	0	0	0	0	0	0	0	0	0	0	0	0	0	0	0	0	0	0	0	0	0	0	0	0	0	0	0	0	0	0	0	0
17545_00027	5601.7	4826.77	2256.67	CP	CP	unknown	Tnnt1-IRES2-CreERT2;Ai82;Ai140_321244-17545	17545	CP_GPe		0	0	0	0	0	0	0	0	0	0	0	0	0	0	0	0	0	0	0	0	0	0	0	0	0	0	0	0	0	0	0	0	0	0	0	0	0	0	0
17545_00028	6928.8	4228.62	2205.08	CP	CP	unknown	Tnnt1-IRES2-CreERT2;Ai82;Ai140_321244-17545	17545	CP_GPe		0	0	0	0	0	0	0	0	0	0	0	0	0	0	0	0	0	0	0	0	0	0	0	0	0	0	0	0	0	0	0	0	0	0	0	0	0	0	0
17545_00029	5433.4	3994.75	2694.6	CP	CP	unknown	Tnnt1-IRES2-CreERT2;Ai82;Ai140_321244-17545	17545	CP_GPe		0	0	0	0	0	0	0	0	0	0	0	0	0	0	0	0	0	0	0	0	0	0	0	0	0	0	0	0	0	0	0	0	0	0	0	0	0	0	0
17545_00030	5171.62	3481.23	2921.7	CP	CP	unknown	Tnnt1-IRES2-CreERT2;Ai82;Ai140_321244-17545	17545	CP_GPe		0	0	0	0	0	0	0	0	0	0	0	0	0	0	0	0	0	0	0	0	0	0	0	0	0	0	0	0	0	0	0	0	0	0	0	0	0	0	0
17545_00040	4271.92	4924.65	3425.35	CP	CP	unknown	Tnnt1-IRES2-CreERT2;Ai82;Ai140_321244-17545	17545	CP_GPe		0	0	0	0	0	0	0	0	0	0	0	0	0	0	0	0	0	0	0	0	0	0	0	0	0	0	0	0	0	0	0	0	0	0	0	0	0	0	0
17545_00041	4622.02	4669.4	3034.03	CP	CP	unknown	Tnnt1-IRES2-CreERT2;Ai82;Ai140_321244-17545	17545	CP_others		0	0	0	0	0	0	0	0	0	0	0	0	0	0	0	0	0	0	0	0	0	0	0	0	0	0	0	0	0	0	0	0	0	0	0	0	0	0	0
17545_00044	5221.95	4560.15	3259.48	CP	CP	unknown	Tnnt1-IRES2-CreERT2;Ai82;Ai140_321244-17545	17545	CP_GPe		0	0	0	0	0	0	0	0	0	0	0	0	0	0	0	0	0	0	0	0	0	0	0	0	0	0	0	0	0	0	0	0	0	0	0	0	0	0	0
17545_00045	4997	4194.27	3035.42	CP	CP	unknown	Tnnt1-IRES2-CreERT2;Ai82;Ai140_321244-17545	17545	CP_SNr		0	0	0	0	0	0	0	0	0	0	0	0	0	0	0	0	0	0	0	0	0	0	0	0	0	0	0	0	0	0	0	0	0	0	0	0	0	0	0
17545_00046	4278.77	3968.57	3117.53	CP	CP	unknown	Tnnt1-IRES2-CreERT2;Ai82;Ai140_321244-17545	17545	CP_GPe		0	0	0	0	0	0	0	0	0	0	0	0	0	0	0	0	0	0	0	0	0	0	0	0	0	0	0	0	0	0	0	0	0	0	0	0	0	0	0
17545_00047	4628.83	3673.95	3229.4	CP	CP	unknown	Tnnt1-IRES2-CreERT2;Ai82;Ai140_321244-17545	17545	CP_others		0	0	0	0	0	0	0	0	0	0	0	0	0	0	0	0	0	0	0	0	0	0	0	0	0	0	0	0	0	0	0	0	0	0	0	0	0	0	0
17545_00048	4220.02	3883.45	3743.6	CP	CP	unknown	Tnnt1-IRES2-CreERT2;Ai82;Ai140_321244-17545	17545	CP_others		0	0	0	0	0	0	0	0	0	0	0	0	0	0	0	0	0	0	0	0	0	0	0	0	0	0	0	0	0	0	0	0	473.687	0	0	0	0	0	0
17545_00050	4998.9	3897.65	3421.08	CP	CP	unknown	Tnnt1-IRES2-CreERT2;Ai82;Ai140_321244-17545	17545	CP_GPe		0	0	0	0	0	0	0	0	0	0	0	0	0	0	0	0	0	0	0	0	0	0	0	0	0	0	0	0	0	0	0	0	0	0	0	0	0	0	0
17545_00052	4066.35	4705.27	4236.62	CP	CP	unknown	Tnnt1-IRES2-CreERT2;Ai82;Ai140_321244-17545	17545	CP_GPe		0	0	0	0	0	0	0	0	0	0	0	0	0	0	0	0	0	0	0	0	0	0	0	0	0	0	0	0	0	0	0	0	0	0	0	0	0	0	0
17545_00053	4700.75	3941.6	4410.2	CP	CP	unknown	Tnnt1-IRES2-CreERT2;Ai82;Ai140_321244-17545	17545	CP_GPe		0	0	0	0	0	0	0	0	0	0	0	0	0	0	0	0	0	0	0	0	0	0	0	0	0	0	0	0	0	0	0	0	0	0	0	0	0	0	0
17545_00054	7045.08	3947.1	3192.83	RT	VPL	unknown	Tnnt1-IRES2-CreERT2;Ai82;Ai140_321244-17545	17545	TH_core		0	0	0	0	11037	0	0	309.318	0	5566.79	0	0	0	0	0	0	0	0	0	0	0	0	0	0	0	0	0	0	0	0	0	0	0	0	0	0	0	0	0
17545_00055	6990	3759.75	3168.95	RT	VPL	unknown	Tnnt1-IRES2-CreERT2;Ai82;Ai140_321244-17545	17545	TH_core		0	0	0	0	22015.3	0	0	18.223	0	5718.5	1370.54	0	0	0	0	0	0	0	0	0	0	0	0	0	0	0	0	0	0	0	0	0	0	0	0	0	0	0	0
17545_00056	7109.67	3702.6	3336.73	fiber tracts	VPM	unknown	Tnnt1-IRES2-CreERT2;Ai82;Ai140_321244-17545	17545	TH_core		0	0	0	0	22910.4	0	0	0	0	0	0	0	0	0	0	0	0	0	0	0	0	0	0	0	0	0	0	0	0	0	0	0	0	0	0	0	0	0	0
17545_00057	6741.62	4462.85	4169.9	VPM	VPM	unknown	Tnnt1-IRES2-CreERT2;Ai82;Ai140_321244-17545	17545	TH_core		0	9971.76	0	0	0	0	20380	278.69	0	0	0	0	0	0	0	0	0	0	0	0	0	0	0	0	0	0	0	0	0	0	0	0	0	0	0	0	0	0	0
17545_00058	7081.1	3872.95	3647.45	VPM	VPM	unknown	Tnnt1-IRES2-CreERT2;Ai82;Ai140_321244-17545	17545	TH_core		0	0	0	30432.8	0	0	0	0	0	0	0	0	0	0	0	0	0	0	0	0	0	0	0	0	0	0	0	0	0	0	0	0	0	0	0	0	0	0	0
17545_00059	4706.6	3115.77	3577.35	CP	CP	unknown	Tnnt1-IRES2-CreERT2;Ai82;Ai140_321244-17545	17545	CP_GPe		0	0	0	0	0	0	0	0	0	0	0	0	0	0	0	0	0	0	0	0	0	0	0	0	0	0	0	0	0	0	0	0	0	0	0	0	0	0	0
17545_00060	4422.1	3286.25	3756	CP	CP	unknown	Tnnt1-IRES2-CreERT2;Ai82;Ai140_321244-17545	17545	CP_GPe		0	0	0	0	0	0	0	0	0	0	0	0	0	0	0	0	0	0	0	0	0	0	0	0	0	0	0	0	0	0	0	0	0	0	0	0	0	0	0
17545_00063	5487.42	2633.35	3627.25	CP	CP	unknown	Tnnt1-IRES2-CreERT2;Ai82;Ai140_321244-17545	17545	CP_GPe		0	0	0	0	0	0	0	0	0	0	0	0	0	0	0	0	0	0	0	0	0	0	0	0	0	0	0	0	0	0	0	0	0	0	0	0	0	0	0
17545_00064	4279.2	3243.98	3941.55	CP	CP	unknown	Tnnt1-IRES2-CreERT2;Ai82;Ai140_321244-17545	17545	CP_GPe		0	98.0083	0	0	0	0	0	0	0	0	0	0	0	0	0	0	0	0	0	0	0	0	0	0	0	0	0	0	0	0	0	0	0	0	0	0	0	0	0
17545_00065	5134.4	3216.1	4273.33	CP	CP	unknown	Tnnt1-IRES2-CreERT2;Ai82;Ai140_321244-17545	17545	CP_GPe		0	0	0	0	0	0	0	0	0	0	0	0	0	0	0	0	0	0	0	0	0	0	0	0	0	0	0	0	0	0	0	0	0	0	0	0	0	0	0
17545_00066	4921.8	2802.15	3938.25	CP	CP	unknown	Tnnt1-IRES2-CreERT2;Ai82;Ai140_321244-17545	17545	CP_GPe		0	0	0	0	0	0	0	0	0	0	0	0	0	0	0	0	0	0	0	0	0	0	0	0	0	0	0	0	0	0	0	0	0	0	0	0	0	0	0
17545_00067	5390.52	2540.65	4099.5	fiber tracts	CP	unknown	Tnnt1-IRES2-CreERT2;Ai82;Ai140_321244-17545	17545	CP_GPe		0	0	0	0	0	0	0	0	0	0	0	0	0	0	0	0	0	0	0	0	0	0	0	0	0	0	0	0	0	0	0	0	0	0	0	0	0	0	0
17545_00068	5006.35	2780.3	4491.75	CP	CP	unknown	Tnnt1-IRES2-CreERT2;Ai82;Ai140_321244-17545	17545	CP_GPe		0	0	0	0	0	0	0	0	0	0	0	0	0	0	0	0	0	0	0	0	0	0	0	0	0	0	0	0	0	0	0	0	0	0	0	0	0	0	0
17545_00071	6931.58	3821.65	4389.4	PO	VAL	unknown	Tnnt1-IRES2-CreERT2;Ai82;Ai140_321244-17545	17545	TH_core		0	54935	14890	0	0	0	0	0	0	0	0	0	0	0	0	0	0	0	0	0	0	0	0	0	0	0	0	0	0	0	0	0	0	0	0	0	0	0	0
17545_00073	7187	4002.18	1923.53	CP	CP	unknown	Tnnt1-IRES2-CreERT2;Ai82;Ai140_321244-17545	17545	CP_GPe		0	0	0	0	0	0	0	0	0	0	0	0	0	0	0	0	0	0	0	0	0	0	0	0	0	0	0	0	0	0	0	0	0	0	0	0	0	0	0
17545_00074	7278.2	3916.88	1899.05	CP	CP	unknown	Tnnt1-IRES2-CreERT2;Ai82;Ai140_321244-17545	17545	CP_GPe		0	0	0	0	0	0	0	0	0	0	0	0	0	0	0	0	0	0	0	0	0	0	0	0	0	0	0	0	0	0	0	0	0	0	0	0	0	0	0
17545_00075	7277.73	3852.25	3190.1	RT	VPM	unknown	Tnnt1-IRES2-CreERT2;Ai82;Ai140_321244-17545	17545	TH_core		0	0	0	0	21569.8	0	0	0	0	0	0	0	0	0	0	0	0	0	0	0	0	0	0	0	0	0	0	0	0	0	0	0	0	0	0	0	0	0	0
17545_00078	7154.38	3691.5	3270.27	RT	VPM	unknown	Tnnt1-IRES2-CreERT2;Ai82;Ai140_321244-17545	17545	TH_core		0	0	0	0	20851.4	0	0	0	0	0	0	0	0	0	0	0	0	0	0	0	0	0	0	0	0	0	0	0	0	0	0	0	0	0	0	0	0	0	0
17545_00081	8018.8	3662.25	3295.73	LGd	MG	unknown	Tnnt1-IRES2-CreERT2;Ai82;Ai140_321244-17545	17545	TH_core		0	0	0	0	0	0	0	0	0	0	444.208	0	0	23550.4	2638.75	5052.05	1799.28	1238.79	0	0	0	0	0	0	0	0	0	0	0	0	0	0	0	0	0	0	0	0	0
17545_00082	8269.28	3615.15	3385.4	MG	MG	unknown	Tnnt1-IRES2-CreERT2;Ai82;Ai140_321244-17545	17545	TH_core		0	0	0	0	0	0	0	0	0	0	317.736	0	0	12563.8	14941.4	603.304	979.784	177.137	0	0	0	0	0	0	0	0	0	0	0	0	0	0	0	0	0	0	0	0	0
17545_00084	7323.55	4350.88	4178.35	VPM	VPL	unknown	Tnnt1-IRES2-CreERT2;Ai82;Ai140_321244-17545	17545	TH_core		0	2736.44	0	9.98494	0	0	5676.94	0	0	0	37426.2	2645.61	59.6866	0	0	0	0	0	0	0	0	0	0	0	0	0	0	0	0	0	0	0	0	0	0	0	0	0	0
17545_00085	7524.85	4377.52	3940.8	VPM	VPL	unknown	Tnnt1-IRES2-CreERT2;Ai82;Ai140_321244-17545	17545	TH_core		0	2825.38	0	0	0	0	49.879	0	0	0	27174.5	1945.78	23279.6	0	0	0	0	0	0	0	0	0	0	0	0	0	0	0	0	0	0	0	0	0	0	0	0	0	0
17545_00088	7450.55	3559.45	2854.53	fiber tracts	LGd	unknown	Tnnt1-IRES2-CreERT2;Ai82;Ai140_321244-17545	17545	TH_core		0	0	0	0	259.773	0	0	0	0	0	771.252	0	0	0	0	0	0	579.424	0	0	4254.13	0	0	0	0	0	0	0	0	0	0	0	0	0	0	15517.5	1314.69	0	0
17545_00089	7145.65	3313.9	3384.65	fiber tracts	LP	unknown	Tnnt1-IRES2-CreERT2;Ai82;Ai140_321244-17545	17545	TH_matrix	anterior LP	0	698.784	13129.9	0	2706.67	987.698	0	319.614	0	229.647	0	0	0	0	0	0	0	0	9699	0	1498.82	0	9697.62	0	0	11631.4	118.959	0	0	0	0	0	0	0	0	0	0	0	1354.71
17545_00091	7680.98	3378.75	3316.2	LGd	LGd	unknown	Tnnt1-IRES2-CreERT2;Ai82;Ai140_321244-17545	17545	TH_core		0	0	0	0	318.303	0	0	0	0	0	389.846	0	0	0	0	0	0	0	0	89.5342	35014.4	0	0	0	0	0	0	0	0	0	0	0	0	0	0	0	0	0	0
17545_00092	7693.9	3624.98	3070.22	IGL	LGd	unknown	Tnnt1-IRES2-CreERT2;Ai82;Ai140_321244-17545	17545	TH_core		0	0	0	0	1227.56	0	0	0	0	0	0	0	0	0	0	0	0	0	229.597	0	34648	0	2200.69	0	0	0	0	0	0	0	0	0	0	0	0	168.28	0	0	539.707
17545_00093	7393.17	2859.68	3396.38	fiber tracts	LGd	unknown	Tnnt1-IRES2-CreERT2;Ai82;Ai140_321244-17545	17545	TH_core		0	0	0	0	0	0	0	0	0	0	0	0	0	0	0	0	1048.52	0	0	0	9638.95	1316.32	0	0	588.437	0	0	0	0	0	0	0	0	0	0	135.25	0	0	0
17545_00094	7529.02	2932.18	3368.02	LGd	LGd	unknown	Tnnt1-IRES2-CreERT2;Ai82;Ai140_321244-17545	17545	TH_core		0	0	0	0	0	0	0	0	0	0	0	0	0	0	1098.65	179.736	19.9952	0	0	649.261	10006.1	742.148	0	269.261	0	0	0	0	0	0	0	0	0	0	0	39.9937	0	0	0
17545_00095	7601.88	3128.82	3573.7	LGd	LGd	unknown	Tnnt1-IRES2-CreERT2;Ai82;Ai140_321244-17545	17545	TH_core		0	0	0	0	0	0	0	0	0	0	0	0	0	0	1188.27	1452.52	119.937	445.41	0	28830.9	600.969	1400.15	0	920.693	0	0	0	0	0	0	0	0	0	0	0	0	0	0	0
17545_00110	6939.95	4173.25	4241.77	VPM	VPM	unknown	Tnnt1-IRES2-CreERT2;Ai82;Ai140_321244-17545	17545	TH_core		0	0	0	0	0	0	29849.5	0	0	0	201.858	0	0	0	0	0	0	0	0	0	0	0	0	0	0	0	0	0	0	0	0	0	0	0	0	0	0	0	0
17545_00111	4637.4	2734.2	4280.6	fiber tracts	CP	unknown	Tnnt1-IRES2-CreERT2;Ai82;Ai140_321244-17545	17545	CP_GPe		0	0	0	0	0	0	0	0	0	0	0	0	0	0	0	0	0	0	0	0	0	0	0	0	0	0	0	0	0	0	0	0	0	0	0	0	0	0	0
17545_00113	4566.42	3096.07	4066	CP	CP	unknown	Tnnt1-IRES2-CreERT2;Ai82;Ai140_321244-17545	17545	CP_GPe		0	0	0	0	0	0	0	0	0	0	0	0	0	0	0	0	0	0	0	0	0	0	0	0	0	0	0	0	0	0	0	0	0	0	0	0	0	0	0
17545_00115	4062.9	4991.73	3467.85	fiber tracts	CP	unknown	Tnnt1-IRES2-CreERT2;Ai82;Ai140_321244-17545	17545	CP_GPe		0	0	0	0	0	0	0	0	0	0	0	0	0	0	0	0	0	0	0	0	0	0	0	0	0	0	0	0	0	0	0	0	0	0	222.781	0	0	0	0
17545_00116	4603.17	4593.98	3004.95	CP	CP	unknown	Tnnt1-IRES2-CreERT2;Ai82;Ai140_321244-17545	17545	CP_GPe		0	0	0	0	0	0	0	0	0	0	0	0	0	0	0	0	0	0	0	0	0	0	0	0	0	0	0	0	0	0	0	0	604.592	0	0	0	0	0	0
17545_00118	4850.83	4949.62	2665.2	CP	CP	unknown	Tnnt1-IRES2-CreERT2;Ai82;Ai140_321244-17545	17545	CP_GPe		0	0	0	0	0	0	0	0	0	0	0	0	0	0	0	0	0	0	0	0	0	0	0	0	0	0	0	0	0	0	0	0	0	0	0	0	0	0	0
17545_00119	4996.12	4722.05	2711.95	CP	CP	unknown	Tnnt1-IRES2-CreERT2;Ai82;Ai140_321244-17545	17545	CP_SNr		0	0	0	0	0	0	0	0	0	0	0	0	0	0	0	0	0	0	0	0	0	0	0	0	0	0	0	0	0	0	0	0	0	0	0	0	0	0	0
17545_00120	5388.3	4848.08	2785.07	CP	CP	unknown	Tnnt1-IRES2-CreERT2;Ai82;Ai140_321244-17545	17545	CP_GPe		0	0	0	0	0	0	0	0	0	0	0	0	0	0	0	0	0	0	0	0	0	0	0	0	0	0	0	0	0	0	0	0	0	0	0	0	0	0	0
17545_00121	5539.67	4680.1	2817.1	CP	CP	unknown	Tnnt1-IRES2-CreERT2;Ai82;Ai140_321244-17545	17545	CP_SNr		0	0	0	0	0	0	0	0	0	0	0	0	0	0	0	0	0	0	0	0	0	0	0	0	0	0	0	0	0	0	0	0	0	0	0	0	0	0	0
17545_00122	5028.6	4668.27	2798.43	CP	CP	unknown	Tnnt1-IRES2-CreERT2;Ai82;Ai140_321244-17545	17545	CP_SNr		0	0	0	0	0	0	0	0	0	0	0	0	0	0	0	0	0	0	0	0	0	0	0	0	0	0	0	0	0	0	0	0	0	0	0	0	0	0	0
17545_00124	5027.73	4588.9	2525.88	CP	CP	unknown	Tnnt1-IRES2-CreERT2;Ai82;Ai140_321244-17545	17545	CP_GPe		0	0	0	0	0	0	0	0	0	0	0	0	0	0	0	0	0	0	0	0	0	0	0	0	0	0	0	0	0	0	0	0	0	0	0	0	0	0	0
17545_00125	4875.6	4570.95	2548.05	CP	CP	unknown	Tnnt1-IRES2-CreERT2;Ai82;Ai140_321244-17545	17545	CP_SNr		0	0	0	0	0	0	0	0	0	0	0	0	0	0	0	0	0	0	0	0	0	0	0	0	0	0	0	0	0	0	0	0	0	0	0	0	0	0	0
17545_00126	5036.35	4464.02	2581.93	CP	CP	unknown	Tnnt1-IRES2-CreERT2;Ai82;Ai140_321244-17545	17545	CP_SNr		0	0	0	0	0	0	0	0	0	0	0	0	0	0	0	0	0	0	0	0	0	0	0	0	0	0	0	0	0	0	0	0	0	0	0	0	0	0	0
17545_00129	5144.58	4571.88	2599.27	CP	CP	unknown	Tnnt1-IRES2-CreERT2;Ai82;Ai140_321244-17545	17545	CP_GPe		0	0	0	0	0	0	0	0	0	0	0	0	0	0	0	0	0	0	0	0	0	0	0	0	0	0	0	0	0	0	0	0	0	0	0	0	0	0	0
17545_00130	5031.6	4332.05	2770.7	CP	CP	unknown	Tnnt1-IRES2-CreERT2;Ai82;Ai140_321244-17545	17545	CP_SNr		0	0	0	0	0	0	0	0	0	0	0	0	0	0	0	0	0	0	0	0	0	0	0	0	0	0	0	0	0	0	0	0	0	0	0	0	0	0	0
17545_00131	5024.2	4244.45	2763.4	CP	CP	unknown	Tnnt1-IRES2-CreERT2;Ai82;Ai140_321244-17545	17545	CP_SNr		0	0	0	0	0	0	0	0	0	0	0	0	0	0	0	0	0	0	0	0	0	0	0	0	0	0	0	0	0	0	0	0	0	0	0	0	0	0	0
17545_00132	4991.62	4267.48	2734.6	CP	CP	unknown	Tnnt1-IRES2-CreERT2;Ai82;Ai140_321244-17545	17545	CP_SNr		0	0	0	0	0	0	0	0	0	0	0	0	0	0	0	0	0	0	0	0	0	0	0	0	0	0	0	0	0	0	0	0	0	0	0	0	0	0	0
17545_00136	4960.12	4451.3	2564.77	CP	CP	unknown	Tnnt1-IRES2-CreERT2;Ai82;Ai140_321244-17545	17545	CP_GPe		0	0	0	0	0	0	0	0	0	0	0	0	0	0	0	0	0	0	0	0	0	0	0	0	0	0	0	0	0	0	0	0	0	0	0	0	0	0	0
17545_00138	5032.95	4399.33	2491	CP	CP	unknown	Tnnt1-IRES2-CreERT2;Ai82;Ai140_321244-17545	17545	CP_SNr		0	0	0	0	0	0	0	0	0	0	0	0	0	0	0	0	0	0	0	0	0	0	0	0	0	0	0	0	0	0	0	0	0	0	0	0	0	0	0
17545_00140	5089	4347.02	2533.25	CP	CP	unknown	Tnnt1-IRES2-CreERT2;Ai82;Ai140_321244-17545	17545	CP_SNr		0	0	0	0	0	0	0	0	0	0	0	0	0	0	0	0	0	0	0	0	0	0	0	0	0	0	0	0	0	0	0	0	0	0	0	0	0	0	0
17545_00142	7269.23	4650.67	3710.62	VPL	VPL	unknown	Tnnt1-IRES2-CreERT2;Ai82;Ai140_321244-17545	17545	TH_core		0	0	0	0	0	0	0	0	0	0	31547.5	0	0	0	0	0	0	0	0	0	0	0	0	0	0	0	0	0	0	0	0	0	0	0	0	0	0	0	0
17545_00143	4505.05	3873.18	2958.5	CP	CP	unknown	Tnnt1-IRES2-CreERT2;Ai82;Ai140_321244-17545	17545	CP_GPe		0	0	0	0	0	0	0	0	0	0	0	0	0	0	0	0	0	0	0	0	0	0	0	0	0	0	0	0	0	0	0	0	0	0	0	0	0	0	0
17545_00144	4877.2	4064.07	3164.82	CP	CP	unknown	Tnnt1-IRES2-CreERT2;Ai82;Ai140_321244-17545	17545	CP_GPe		0	0	0	0	0	0	0	0	0	0	0	0	0	0	0	0	0	0	0	0	0	0	0	0	0	0	0	0	0	0	0	0	0	0	0	0	0	0	0
17545_00145	5127.92	3845.2	3059.5	CP	CP	unknown	Tnnt1-IRES2-CreERT2;Ai82;Ai140_321244-17545	17545	CP_GPe		0	0	0	0	0	0	0	0	0	0	0	0	0	0	0	0	0	0	0	0	0	0	0	0	0	0	0	0	0	0	0	0	0	0	0	0	0	0	0
17545_00146	5035.27	3704.68	3181.8	CP	CP	unknown	Tnnt1-IRES2-CreERT2;Ai82;Ai140_321244-17545	17545	CP_GPe		0	0	0	0	0	0	0	0	0	0	0	0	0	0	0	0	0	0	0	0	0	0	0	0	0	0	0	0	0	0	0	0	0	0	0	0	0	0	0
17545_00147	4539.62	3363.55	3437.77	CP	CP	unknown	Tnnt1-IRES2-CreERT2;Ai82;Ai140_321244-17545	17545	CP_others		0	743.712	0	0	0	0	0	0	0	0	0	0	0	0	0	0	0	0	0	0	0	0	0	0	0	0	0	0	0	0	0	0	0	0	0	0	0	0	0
17545_00149	5368.38	3364	3196.5	CP	CP	unknown	Tnnt1-IRES2-CreERT2;Ai82;Ai140_321244-17545	17545	CP_others		0	0	0	0	0	0	0	0	0	0	0	0	0	0	0	0	0	0	0	0	0	0	0	0	0	0	0	0	0	0	0	0	0	0	0	0	0	0	0
17545_00150	5038.77	3650.27	2953.07	CP	CP	unknown	Tnnt1-IRES2-CreERT2;Ai82;Ai140_321244-17545	17545	CP_GPe		0	0	0	0	0	0	0	0	0	0	0	0	0	0	0	0	0	0	0	0	0	0	0	0	0	0	0	0	0	0	0	0	0	0	0	0	0	0	0
17545_00154	7056.4	3500.3	3699.05	VPM	VPM	unknown	Tnnt1-IRES2-CreERT2;Ai82;Ai140_321244-17545	17545	TH_core		0	12003.2	0	0	518.703	69.2737	0	22556.3	0	346.533	0	0	0	0	0	0	0	0	0	0	0	0	0	0	0	0	0	0	0	0	0	0	0	0	0	0	0	0	0
17545_00155	5583.5	3421.43	2882.27	CP	CP	unknown	Tnnt1-IRES2-CreERT2;Ai82;Ai140_321244-17545	17545	CP_GPe		0	0	0	0	0	0	0	0	0	0	0	0	0	0	0	0	0	0	0	0	0	0	0	0	0	0	0	0	0	0	0	0	0	0	0	0	0	0	0
17545_00158	5081.02	2614.15	4342.83	fiber tracts	CP	unknown	Tnnt1-IRES2-CreERT2;Ai82;Ai140_321244-17545	17545	CP_GPe		0	0	0	0	0	0	0	0	0	0	0	0	0	0	0	0	0	0	0	0	0	0	0	0	0	0	0	0	0	0	0	0	0	0	0	0	0	0	0
17545_00159	5738.8	2525.52	3829.52	fiber tracts	CP	unknown	Tnnt1-IRES2-CreERT2;Ai82;Ai140_321244-17545	17545	CP_GPe		0	0	0	0	0	0	0	0	0	0	0	0	0	0	0	0	0	0	0	0	0	0	0	0	0	0	0	0	0	0	0	0	0	0	0	0	0	0	0
17545_00162	8024.6	4002.57	3655.82	MG	MG	unknown	Tnnt1-IRES2-CreERT2;Ai82;Ai140_321244-17545	17545	TH_core		0	0	0	0	750.87	0	0	2407.09	0	316.597	31939.4	0	0	0	0	0	0	0	0	0	0	0	0	0	0	0	0	0	0	0	0	0	0	0	0	0	0	0	0
17545_00163	8358.3	3824.98	3420.6	MG	MG	unknown	Tnnt1-IRES2-CreERT2;Ai82;Ai140_321244-17545	17545	TH_core		0	0	0	0	0	0	0	0	0	0	4235.06	0	0	8759.2	11072.3	0	7514.19	0	0	0	0	0	0	0	0	0	0	0	0	0	0	0	0	0	0	0	0	0	0
17545_00164	8575.6	4150.9	3119.27	DG	MG	unknown	Tnnt1-IRES2-CreERT2;Ai82;Ai140_321244-17545	17545	TH_core	single target	0	0	0	0	0	0	0	0	0	0	0	0	0	69.9881	29816.6	0	0	0	0	0	0	0	0	0	0	0	0	0	0	0	0	0	0	0	0	0	0	0	0
17545_00165	8427.15	4045.35	3147.62	unknown	MG	unknown	Tnnt1-IRES2-CreERT2;Ai82;Ai140_321244-17545	17545	TH_core		0	0	0	0	0	0	0	0	0	0	0	0	0	508.524	27330.5	0	2170.1	0	0	0	0	0	0	0	0	0	0	0	0	0	0	0	0	0	0	0	0	0	0
17545_00166	8385.03	3987.02	3114.57	unknown	MG	unknown	Tnnt1-IRES2-CreERT2;Ai82;Ai140_321244-17545	17545	TH_core	single target	0	0	0	0	0	0	0	0	0	0	0	0	0	801.188	25182.3	0	1831.85	0	0	0	0	0	0	0	0	0	0	0	0	0	0	0	0	0	0	0	0	0	0
17545_00168	7198.85	3515.02	3370.95	fiber tracts	VPM	unknown	Tnnt1-IRES2-CreERT2;Ai82;Ai140_321244-17545	17545	TH_core		0	0	0	0	19178.9	0	0	0	0	0	0	0	0	0	0	0	0	0	0	0	0	0	0	0	0	0	0	0	0	0	0	0	0	0	0	0	0	0	0
17545_00169	7750.05	3686.4	3597.9	fiber tracts	VPM	unknown	Tnnt1-IRES2-CreERT2;Ai82;Ai140_321244-17545	17545	TH_core		0	0	0	0	770	0	0	0	0	0	44925.5	0	155.475	2822.25	0	0	489.97	39.8838	0	0	0	0	0	0	0	0	0	0	0	0	0	0	0	0	0	0	0	0	0
17545_00170	7713.92	3364.43	3562.48	LGd	LGd	unknown	Tnnt1-IRES2-CreERT2;Ai82;Ai140_321244-17545	17545	TH_core		0	0	0	0	1116.47	0	0	0	0	0	0	0	0	0	0	0	0	664.95	0	218.636	40539.7	0	0	0	0	0	0	0	0	0	0	0	0	0	0	0	0	0	0
17545_00172	7338.73	3737.93	3278.62	fiber tracts	VPM	unknown	Tnnt1-IRES2-CreERT2;Ai82;Ai140_321244-17545	17545	TH_core		0	0	0	0	15452.7	0	0	0	0	0	436.659	0	0	535.476	657.776	0	0	0	0	0	0	0	0	0	0	0	0	0	0	0	0	0	0	0	0	0	0	0	0
17545_00173	8040.92	3482.85	3102.57	LGd	LGd	unknown	Tnnt1-IRES2-CreERT2;Ai82;Ai140_321244-17545	17545	TH_core		0	0	0	0	770.669	0	0	0	0	0	0	0	0	0	0	0	0	0	0	0	27037.4	0	0	0	0	0	0	0	0	0	0	0	0	0	0	0	0	0	0
17545_00174	7451.48	3049.88	3417.65	LGd	LGd	unknown	Tnnt1-IRES2-CreERT2;Ai82;Ai140_321244-17545	17545	TH_core		0	0	0	0	0	0	0	0	0	0	0	0	0	0	758.439	278.877	0	0	0	1896.84	21828.5	1692.96	0	258.773	0	0	0	0	0	0	0	0	0	0	0	0	0	0	0
17545_00175	6397.25	4874.38	5400.12	SMT	SMT	unknown	Tnnt1-IRES2-CreERT2;Ai82;Ai140_321244-17545	17545	TH_core	small arbor	0	0	0	0	0	0	0	0	0	0	0	0	0	0	0	0	0	0	0	0	0	0	0	0	0	0	0	0	445.905	15238.5	394.143	29356.7	0	0	0	0	0	0	0
17545_00176	7214.88	3045.2	4012.98	LP	LP	unknown	Tnnt1-IRES2-CreERT2;Ai82;Ai140_321244-17545	17545	TH_matrix	anterior LP	0	0	0	0	1348.9	0	0	0	0	0	0	0	0	0	0	0	0	0	3153.43	0	349.561	0	39962.9	0	0	0	0	0	0	0	0	0	0	0	0	626.274	1455.11	0	638.968
17545_00177	5965.4	4247.48	5561.67	PVT	PVT	unknown	Tnnt1-IRES2-CreERT2;Ai82;Ai140_321244-17545	17545	TH_matrix		0	0	0	0	0	0	0	0	0	0	0	0	0	0	0	0	0	0	0	0	0	0	0	0	0	0	0	0	0	0	0	0	0	0	0	0	0	0	0
17545_00179	7910.45	3577.2	3296.65	LGd	LGd	unknown	Tnnt1-IRES2-CreERT2;Ai82;Ai140_321244-17545	17545	TH_core		0	0	0	0	0	0	0	0	0	0	0	0	0	918.519	0	0	0	2466.85	0	269.46	44582.4	0	59.8369	0	0	0	0	0	0	0	0	0	0	0	0	0	0	0	0
17545_00180	6429.55	5149.8	5398.52	RE	RE	unknown	Tnnt1-IRES2-CreERT2;Ai82;Ai140_321244-17545	17545	TH_matrix		0	637.92	1308.76	0	0	538.731	0	0	571.644	0	0	0	0	0	0	0	0	0	0	0	0	0	148.762	0	0	2485.09	2337.99	912.828	363.999	1850.54	3706.6	15010.3	0	0	126.839	7561.49	10288.6	108.881	0
17781_00001	4096.98	5563.05	3186.8	EPd	CLA	unknown	Gnb4-IRES2-CreERT2;Ai82;Ai140_339951-17781	17781			4308.64	0	867.193	0	0	0	0	0	0	0	0	0	0	0	0	0	0	0	0	0	0	0	0	0	0	0	0	0	0	26284.9	2215.02	30520.6	5135.58	0	3311.99	0	0	0	0
17781_00002	4680	4914.05	2276.9	AId	CLA	6a	Gnb4-IRES2-CreERT2;Ai82;Ai140_339951-17781	17781			2975.26	1974.26	8535.76	0	0	408.215	0	764.734	0	268.913	0	1556.2	1047.74	0	0	0	0	0	0	0	0	0	0	0	1774.03	59.5776	0	0	1152.02	6100.24	7908.15	13590.4	10730	2982.07	5672.83	0	0	0	0
17781_00003	3877.35	3681.02	3400.73	MOp	CLA	6a	Gnb4-IRES2-CreERT2;Ai82;Ai140_339951-17781	17781			3688.13	44228.2	22827.8	359.515	0	0	17605.2	2384.05	0	0	1436.2	495.349	0	0	0	0	0	0	0	0	0	0	0	0	0	0	0	0	0	6989.05	0	461.722	6502.63	0	532.517	0	0	0	0
17781_00004	5962.92	4721.23	2091.98	CP	CLA	unknown	Gnb4-IRES2-CreERT2;Ai82;Ai140_339951-17781	17781			0	0	0	0	0	0	0	0	0	0	0	0	0	0	0	0	0	0	0	0	0	0	0	0	0	0	0	0	0	0	0	0	0	629.363	0	0	0	0	0
17781_2184_x15071_y19950	2725.27	4139.58	3867.95	ORBl	ORBl	5	Gnb4-IRES2-CreERT2;Ai82;Ai140_339951-17781	17781			985.339	5536.01	24027.1	0	0	0	1479.21	0	0	0	0	0	0	0	0	0	0	0	0	0	0	0	0	0	0	17.8656	0	129.469	0	34364.8	0	1279.55	22126.9	0	2385.91	0	0	0	0
17781_2491_x13559_y38398	3055.15	3686.57	2681.88	MOp	GU	2/3	Gnb4-IRES2-CreERT2;Ai82;Ai140_339951-17781	17781			0	17255.1	6175.51	0	0	0	0	0	0	0	98.4925	1746.84	6994.96	0	0	0	0	0	0	0	0	0	0	0	0	0	0	0	0	0	0	0	3954.01	69.6955	0	0	0	0	0
17781_3668_x9453_y17266	5141.12	2383.32	3444.43	SSp-ul	SSp-ul	6a	Gnb4-IRES2-CreERT2;Ai82;Ai140_339951-17781	17781			0	4199.93	0	907.612	0	730.54	0	22006.3	0	239.122	415.831	0	0	0	0	0	226.277	0	0	0	0	0	0	0	0	0	0	0	0	0	0	0	0	0	0	0	0	0	0
17781_3819_x16144_y41186	4849.23	4093.35	2241.15	SSs	SSs	6b	Gnb4-IRES2-CreERT2;Ai82;Ai140_339951-17781	17781			0	0	0	0	0	0	34281.5	0	0	0	47106.2	17415.1	1377.91	0	0	0	0	0	0	0	0	0	0	0	0	0	0	0	0	0	0	0	138.331	0	0	0	0	0	0
17781_4095_x17570_y12460	5229.52	4704.83	2281.32	CP	CLA	unknown	Gnb4-IRES2-CreERT2;Ai82;Ai140_339951-17781	17781			159.488	6084.07	7624.71	39.9735	49.3632	908.546	39.9903	1420.57	1548.94	478.005	1278.23	1993.99	168.857	0	0	0	0	0	1681.83	0	6443.47	0	2920.79	0	0	18824.5	11263.5	3506.6	0	9.86032	97.8079	4991.37	0	688.931	0	3308.22	3131.85	6401.46	2846.12
17781_4710_x13766_y10574	6146.4	3581	1817.07	SSs	SSs	6a	Gnb4-IRES2-CreERT2;Ai82;Ai140_339951-17781	17781			0	15804.9	18131.6	5646.34	3533.3	11675.4	4766.81	27305.4	527.314	2881.32	32561.6	0	0	0	0	0	0	0	0	0	0	0	0	0	0	0	0	0	0	0	0	0	0	0	0	0	0	0	0
17781_4874_x11466_y11924	6475.88	2902	2262.6	SSp-bfd	SSp-bfd	6a	Gnb4-IRES2-CreERT2;Ai82;Ai140_339951-17781	17781			0	9877.6	29797.5	43915.7	8893.59	0	1620.42	2258.57	0	4712.13	8551.1	0	0	0	0	0	0	0	0	0	0	0	0	0	0	0	0	0	0	0	0	0	0	0	0	0	0	0	0
17781_5166_x11993_y10858	6740.8	3051.1	1961.4	SSs	SSs	6b	Gnb4-IRES2-CreERT2;Ai82;Ai140_339951-17781	17781			0	358.549	0	1036.97	7682.12	49.9018	865.909	13836.7	0	5908.02	6459.71	0	0	0	0	0	0	0	0	0	0	0	0	0	0	0	0	0	0	0	0	0	0	0	0	0	0	0	0
17781_5361_x17741_y11849	6683.83	4620.17	2287.18	CP	SSs	unknown	Gnb4-IRES2-CreERT2;Ai82;Ai140_339951-17781	17781			0	0	0	0	0	0	0	0	0	0	0	0	0	0	0	0	0	0	0	0	0	0	0	0	0	0	0	0	0	0	0	0	0	0	0	0	0	0	0
17781_5548_x15772_y8872	6939.85	4202.02	1397.4	VISC	VISC	5	Gnb4-IRES2-CreERT2;Ai82;Ai140_339951-17781	17781			0	377.877	0	2233.83	23933.5	1714.39	1583.95	7274.77	1122.23	5376.7	31099	0	5218.95	129.75	0	0	168.053	0	0	0	0	0	0	0	0	0	0	0	0	0	0	0	0	29.9428	0	0	0	0	1742.03
17781_5655_x10641_y11102	7145	2691.35	1956.9	SSs	SSs	6b	Gnb4-IRES2-CreERT2;Ai82;Ai140_339951-17781	17781			0	4945.14	32252.5	0	21158.5	3030.66	0	2884.96	0	1507.51	23162.6	0	0	2772.29	0	0	163.678	0	0	0	158.759	0	0	0	0	3525.12	0	0	0	0	0	0	0	0	0	677.501	548.374	0	0
17781_5894_x11460_y10079	7384.3	2953.62	1699.22	AUDd	AUDp	6b	Gnb4-IRES2-CreERT2;Ai82;Ai140_339951-17781	17781			0	607.828	127.935	0	2229.35	1820.61	0	298.094	219.227	179.61	8838.25	0	0	15528.5	18750.7	2007.09	1726.57	0	0	0	0	0	0	0	0	0	0	0	0	0	0	0	0	0	0	0	0	0	0
17781_6028_x9772_y42888	7432.45	2316.82	1831.22	SSs	SSs	5	Gnb4-IRES2-CreERT2;Ai82;Ai140_339951-17781	17781			0	7843.78	948.982	0	4279.44	8068.46	0	329.424	148.809	219.399	12474.2	0	0	6534.96	0	1183.45	0	0	0	0	0	0	0	0	0	0	0	0	0	0	0	0	0	0	0	0	0	0	0
17781_6202_x7633_y12296	7663.88	1947.55	1994.95	SSs	SSp-bfd	6b	Gnb4-IRES2-CreERT2;Ai82;Ai140_339951-17781	17781			0	568.449	1129.71	0	7681.64	2686.7	0	707.526	2405.85	356.429	657.416	0	0	0	0	0	0	0	437.827	0	653.912	0	89.1828	0	0	3437.77	0	0	0	0	0	0	0	0	0	4026.1	10689.1	8522.74	1941.79
17781_6228_x12697_y8412	7715.17	3335.43	1188.18	AUDp	AUDp	6a	Gnb4-IRES2-CreERT2;Ai82;Ai140_339951-17781	17781			0	0	0	0	0	0	0	0	0	0	1811.84	0	0	5811.06	40822.4	199.14	13404.3	1617.56	335.827	2455.54	22996.3	0	1953.84	548.895	856.442	0	0	0	0	0	0	0	0	0	0	2947.33	1150.69	0	1182.3
17781_6262_x6896_y13574	7723.98	1754.5	2357.5	SSp-bfd	SSp-bfd	5	Gnb4-IRES2-CreERT2;Ai82;Ai140_339951-17781	17781			0	659.008	15087.6	0	27611.8	1651.72	0	0	1994.72	0	5014.74	0	0	525.886	0	0	0	3740.97	554.939	0	1525.26	0	0	0	0	7719.8	0	0	0	0	0	0	0	0	0	847.467	129.707	0	3009.92
17781_6270_x9494_y43380	7726.77	2269.4	1579.5	AUDd	AUDd	5	Gnb4-IRES2-CreERT2;Ai82;Ai140_339951-17781	17781			0	4469.17	0	0	0	5787.46	0	609.746	18916.2	0	1632.79	0	0	9057.25	1931.44	227.547	0	308.783	2309.58	0	376.598	0	0	0	0	0	0	0	0	0	0	0	0	0	0	686.267	0	0	8772.48
17781_6287_x8230_y11645	7782.2	2220.3	1807.43	AUDd	SSs	6b	Gnb4-IRES2-CreERT2;Ai82;Ai140_339951-17781	17781			0	764.431	128.632	0	5046.44	4156.36	0	1080.05	17177.6	233.435	6745.53	0	0	7064.59	99.0378	1265.42	0	475.371	2747.16	0	928.354	0	358.538	526.634	0	0	0	0	0	0	0	0	0	0	0	4289.15	205.63	0	19361.7
17781_6325_x14423_y8278	7847.95	3881.77	1150.75	TEa	TEa	6a	Gnb4-IRES2-CreERT2;Ai82;Ai140_339951-17781	17781			0	0	0	735.424	4364.87	0	0	0	0	0	13925.6	0	0	6546.17	12426.4	15031.9	9585.14	3002.19	268.793	1825.41	9179.37	159.541	1301.01	1860.88	1170.32	0	0	0	0	0	0	0	0	0	0	0	0	0	749.662
17781_6355_x6443_y33777	8413.62	1222.1	4529.88	fiber tracts	CA1	6a	Gnb4-IRES2-CreERT2;Ai82;Ai140_339951-17781	17781			0	0	0	0	0	0	0	0	0	0	0	0	0	0	0	0	0	0	149.706	0	0	0	0	0	0	0	467.963	0	0	0	0	0	0	0	0	0	0	13132.6	0
17781_6626_x22318_y13682	8223.25	6197.15	2788.55	PA	TR	unknown	Gnb4-IRES2-CreERT2;Ai82;Ai140_339951-17781	17781			0	0	0	0	0	0	0	0	0	0	0	0	0	0	0	0	0	0	0	0	0	0	0	0	0	0	0	0	0	0	0	0	0	0	0	0	0	0	0
17781_6627_x22762_y14486	8269.3	6307.75	2943.52	COAp	TR	unknown	Gnb4-IRES2-CreERT2;Ai82;Ai140_339951-17781	17781			0	0	0	0	0	0	0	0	0	0	0	0	0	0	0	0	0	0	0	0	0	0	0	0	0	0	0	0	0	0	0	0	0	0	0	0	0	0	0
17781_6643_x22317_y12822	8226.72	6174.48	2541.55	PA	TR	unknown	Gnb4-IRES2-CreERT2;Ai82;Ai140_339951-17781	17781			0	0	0	0	0	0	0	0	0	0	0	0	0	0	0	0	0	0	0	0	0	0	0	0	0	0	0	0	0	0	0	0	0	0	0	0	0	0	0
17781_6802_x8324_y14113	8459.62	2413	2359.95	CA1	CA1	1	Gnb4-IRES2-CreERT2;Ai82;Ai140_339951-17781	17781			0	0	0	0	198.391	0	0	9.94423	0	189.009	0	0	0	0	0	0	0	0	0	0	0	0	0	0	0	0	0	0	0	0	0	0	0	0	0	0	0	0	0
17781_6866_x8954_y41812	8496.3	2366.4	1836.03	AUDpo	VISl	6b	Gnb4-IRES2-CreERT2;Ai82;Ai140_339951-17781	17781			0	0	0	0	1891.48	0	0	0	0	0	0	0	0	128.261	0	3314.75	0	2571.43	3538.32	0	35415.1	0	21792.4	256.133	187.593	0	0	0	0	0	0	0	0	0	0	106.514	39.9679	0	4905.97
17781_6881_x22248_y12698	8499.15	6115.65	2530.05	PA	TR	unknown	Gnb4-IRES2-CreERT2;Ai82;Ai140_339951-17781	17781			0	0	0	0	0	0	0	0	0	0	0	0	0	0	0	0	0	0	0	0	0	0	0	0	0	0	0	0	0	0	0	0	207.908	67.8004	0	0	0	0	0
17781_7132_x8998_y15272	9408.15	1976.43	3621.45	POST	SUB	unknown	Gnb4-IRES2-CreERT2;Ai82;Ai140_339951-17781	17781			0	0	0	0	0	728.525	0	179.867	399.234	0	0	0	0	0	0	0	0	0	0	0	0	0	0	0	0	0	449.698	0	0	0	0	0	0	0	0	0	0	0	199.679
17781_7281_x18241_y11406	9224.97	4799.75	2291.2	SUB	SUB	unknown	Gnb4-IRES2-CreERT2;Ai82;Ai140_339951-17781	17781			0	0	0	0	0	0	0	0	0	0	0	0	0	0	0	0	0	0	0	0	0	0	0	0	0	0	0	0	0	0	0	0	0	0	0	0	0	0	0
17782_00001	3687.05	4150.85	3113.65	AId	CLA	6a	Gnb4-IRES2-CreERT2;Ai82;Ai140_339952-17782	17782			1468.13	7327.52	18478.3	0	0	0	29.9268	0	0	0	4752.99	4618.5	9092.52	0	0	0	0	0	0	0	0	0	0	0	0	0	0	0	0	1022.54	0	0	26314.4	2505.46	136.613	0	0	0	0
17782_00002	3823.57	4168.98	2880.73	AId	CLA	5	Gnb4-IRES2-CreERT2;Ai82;Ai140_339952-17782	17782			5456.27	12516.3	51462.2	448.491	0	0	10408.2	825.952	0	421.94	4711.22	0	0	0	0	0	0	0	0	0	0	0	0	0	0	0	0	501.593	0	2798.9	0	89.4618	3169.47	0	0	0	0	0	0
17782_00003	3719.68	3985.15	3124.92	AId	CLA	6a	Gnb4-IRES2-CreERT2;Ai82;Ai140_339952-17782	17782			1803.97	6088.71	31580.3	0	5731.1	937.045	0	298.769	0	562.399	0	1945.54	608.406	0	0	0	0	0	0	0	0	0	0	0	0	3880.24	807.044	2102.87	0	586.282	0	127.192	4030.44	1616.2	0	0	0	0	0
17782_00004	3763.15	4025.9	2962.58	MOp	CLA	6a	Gnb4-IRES2-CreERT2;Ai82;Ai140_339952-17782	17782			0	12101.7	1137.86	11943.3	562.208	2545.16	9552.07	12234.7	1111.11	3303.1	24833	9192.51	1844.13	0	0	0	189.674	0	0	0	0	0	0	0	0	0	738.562	9.99862	0	0	0	0	3771.49	0	0	0	0	0	297.851
17782_00005	4327.52	4290.12	2564.38	GU	CLA	6a	Gnb4-IRES2-CreERT2;Ai82;Ai140_339952-17782	17782			2110.33	2691.02	24189.5	781.816	1820.92	0	77.8022	2277.52	0	1047.02	12604.9	5350.84	11730.3	0	0	0	0	0	0	0	0	0	0	0	0	0	0	0	0	2382.73	0	0	23966.2	4470.29	320.579	0	0	0	0
17782_00006	4298.38	4580.45	2664.62	AId	CLA	6a	Gnb4-IRES2-CreERT2;Ai82;Ai140_339952-17782	17782			1029.94	896.089	1000.23	0	0	0	0	0	0	0	0	1426.15	29.9989	0	0	0	0	0	0	0	0	0	0	0	0	0	0	821.957	49.9747	1483.79	1370.01	1289.21	8689.76	1218.04	1580.54	0	0	0	0
17782_3138_x32805_y18352	3718.82	4161.35	3128.62	AId	AId	6a	Gnb4-IRES2-CreERT2;Ai82;Ai140_339952-17782	17782			1994.04	7531.55	19205.9	0	0	0	47.4101	0	0	0	4414.06	4859.17	9533.11	0	0	0	0	0	0	0	0	0	0	0	0	0	0	0	0	758.086	0	0	26410.3	2165.96	146.819	0	0	0	0
17782_3253_x33739_y18314	3867.07	4173.6	2896.1	AId	AId	6a	Gnb4-IRES2-CreERT2;Ai82;Ai140_339952-17782	17782			5414.36	12368.6	52496.5	249.09	0	0	10643.9	706.463	0	499.355	4543.36	0	0	0	0	0	0	0	0	0	0	0	0	0	0	0	0	196.684	0	1507.42	0	48.1698	3278.44	0	0	0	0	0	0
17782_3284_x11909_y16428	3815.32	3945.3	3185.78	MOp	MOp	6a	Gnb4-IRES2-CreERT2;Ai82;Ai140_339952-17782	17782			346.939	6966.8	34692.5	0	5941.44	924.523	0	289.249	0	641.977	0	2114.36	688.28	0	0	0	0	0	0	0	0	0	0	0	19.9931	4443.67	507.879	801.525	0	0	0	0	1754.02	1557.27	0	0	0	0	0
17782_3352_x11384_y16404	3882.4	3964.15	3051.47	MOp	MOp	6a	Gnb4-IRES2-CreERT2;Ai82;Ai140_339952-17782	17782			0	12090.1	803.621	11962.1	603.632	2732.56	10920.2	11877.2	1045.07	3323.93	25000.5	8549.59	1857.14	0	0	0	129.845	0	0	0	0	0	0	0	0	0	598.44	0	0	0	0	0	3635.35	0	0	0	0	0	337.795
17782_3487_x11014_y17041	4019.5	4183.8	2947.28	AId	AId	6a	Gnb4-IRES2-CreERT2;Ai82;Ai140_339952-17782	17782			1584.37	4601.94	31337.9	0	0	0	0	0	0	0	0	321.991	0	0	0	0	0	0	0	0	0	0	0	0	0	1020.19	735.025	468.686	1671.64	0	922.886	2199.35	2279.07	0	0	0	0	0	0
17782_3651_x35286_y18512	4349.62	4288.5	2558.35	GU	GU	6a	Gnb4-IRES2-CreERT2;Ai82;Ai140_339952-17782	17782			2341.64	2649.12	24278.3	1053.12	1353.84	0	0	2164.63	0	1032.24	12547.6	5530.13	12127.9	0	0	0	0	0	0	0	0	0	0	0	0	0	0	0	0	1515.49	0	0	23995.3	4348.7	306.962	0	0	0	0
17782_3672_x34784_y19432	4318.58	4578.23	2670.12	AId	AId	6a	Gnb4-IRES2-CreERT2;Ai82;Ai140_339952-17782	17782			867.704	1888.64	1431.35	0	0	0	0	0	0	0	0	1386.88	0	0	0	0	0	0	0	0	0	0	0	0	0	0	0	939.662	49.9789	1406.02	1367.22	1484.17	8357.29	1307.37	1568.01	0	0	0	0
17787_00004	5502.85	3236.88	970.7	unknown	SSp-bfd	unknown	Plxnd1-CreER;Ai166_351327-17787	17787			0	4442.43	0	3371.78	0	0	2954.3	0	0	0	11909.7	0	1988.04	0	0	0	0	0	0	0	0	0	0	0	0	0	0	0	0	0	0	0	0	0	0	0	0	0	0
17787_00007	6403.75	3384.75	2044.58	SSs	CP	6b	Plxnd1-CreER;Ai166_351327-17787	17787	CP_SNr		0	0	0	0	0	0	0	0	0	0	2707.18	0	0	0	0	0	0	0	0	0	0	0	0	0	0	0	0	0	0	0	0	0	0	0	0	0	0	0	0
17787_00013	5464.58	3542.73	4112.08	CP	CP	unknown	Plxnd1-CreER;Ai166_351327-17787	17787	CP_GPe		0	0	0	0	0	0	0	0	0	0	0	0	0	0	0	0	0	0	0	0	0	0	0	0	0	0	0	0	0	0	0	0	0	0	0	0	0	0	0
17787_00014	5120.62	3930.5	3705.5	CP	CP	unknown	Plxnd1-CreER;Ai166_351327-17787	17787	CP_SNr		0	0	0	0	0	0	0	0	0	0	0	0	0	0	0	0	0	0	0	0	0	0	0	0	0	0	0	0	0	0	0	0	0	0	0	0	0	0	0
17787_00019	5041.75	3456.12	2570.8	SSp-m	CP	6b	Plxnd1-CreER;Ai166_351327-17787	17787	CP_SNr		0	0	0	0	0	0	3184.38	0	0	0	0	0	0	0	0	0	0	0	0	0	0	0	0	0	0	0	0	0	0	0	0	0	0	0	0	0	0	0	0
17787_00026	6284.75	4411.12	1572.03	VISC	CP	6a	Plxnd1-CreER;Ai166_351327-17787	17787	CP_SNr		0	0	0	0	0	0	0	0	0	0	418.963	0	2590.05	0	0	0	0	0	0	0	0	0	0	0	0	0	0	0	0	0	0	0	0	198.065	0	0	0	0	0
17787_00029	6247.65	4939.83	1728.08	AIp	CP	6a	Plxnd1-CreER;Ai166_351327-17787	17787	CP_others		0	0	0	0	0	0	0	0	0	0	0	0	89.3469	0	0	0	0	0	0	0	0	0	0	0	0	0	0	0	0	0	0	0	0	2876.67	0	0	0	0	0
17787_00048	4832.95	4597.55	2675.95	CP	CP	unknown	Plxnd1-CreER;Ai166_351327-17787	17787	CP_SNr		0	0	0	0	0	0	0	0	0	0	0	44.9594	0	0	0	0	0	0	0	0	0	0	0	0	0	0	0	0	0	0	0	0	68.9363	0	0	0	0	0	0
17787_00049	4965.3	4626.5	2381.98	fiber tracts	CP	unknown	Plxnd1-CreER;Ai166_351327-17787	17787	CP_SNr		0	0	0	0	0	0	0	0	0	0	0	578.891	0	0	0	0	0	0	0	0	0	0	0	0	0	0	0	0	0	0	0	0	124.315	0	0	0	0	0	0
17787_00050	4953.38	4859.4	2560.55	CP	CP	unknown	Plxnd1-CreER;Ai166_351327-17787	17787	CP_SNr		0	0	0	0	0	0	0	0	0	0	0	0	0	0	0	0	0	0	0	0	0	0	0	0	0	0	0	0	0	0	0	0	0	0	0	0	0	0	0
17787_4521_x5172_y12873	5437.12	4442.27	1227.2	VISC	SSs	5	Plxnd1-CreER;Ai166_351327-17787	17787			0	0	0	348.543	0	0	0	0	0	0	19949.7	12118.4	19300.4	390.75	0	0	401.775	0	0	0	0	0	0	0	0	0	0	0	0	0	0	0	6450.48	2327.05	0	0	0	0	0
17787_4690_x4440_y9176	5512.52	3231.43	967.6	unknown	SSs	2/3	Plxnd1-CreER;Ai166_351327-17787	17787			0	5346.69	0	3344.16	0	0	3073.28	0	0	0	12346.6	0	1208.25	0	0	0	0	0	0	0	0	0	0	0	0	0	0	0	0	0	0	0	0	0	0	0	0	0	0
17787_7070_x12739_y1410	8550.25	611.125	3910.9	VISpm	VISpm	2/3	Plxnd1-CreER;Ai166_351327-17787	17787			0	0	2423.85	0	0	0	0	0	0	0	0	0	0	0	0	0	0	0	487.279	0	5636.41	0	17835.6	0	0	0	0	0	0	0	0	0	0	0	0	1206.21	858.288	0	189.862
17788_3709_x6000_y8213	4446.33	2886.27	2324.1	SSp-m	SSp-m	4	Plxnd1-CreER;Ai166_351331-17788	17788			0	0	0	0	0	0	29594.5	0	0	0	0	0	0	0	0	0	0	0	0	0	0	0	0	0	0	0	0	0	0	0	0	0	0	0	0	0	0	0	0
17788_4719_x3512_y9492	5693.77	3369.8	1400.03	SSs	SSs	4	Plxnd1-CreER;Ai166_351331-17788	17788			0	6489.64	3440.47	2557.05	0	0	4603.63	3174.82	0	382.284	21284.8	0	3538	0	0	0	0	0	0	0	0	0	0	0	0	0	0	0	0	0	0	0	0	333.565	0	0	0	0	0
17788_5767_x16636_y3662	6975.98	1361.12	5502.88	RSPv	RSPv	2/3	Plxnd1-CreER;Ai166_351331-17788	17788			0	0	1597.42	0	0	0	0	0	0	0	0	0	0	0	0	0	0	0	0	0	19.8113	0	0	0	0	0	186.655	0	0	0	0	0	0	0	0	0	16053.7	43401.1	0
18047_00003	4963.62	1404.9	4737.52	MOs	MOp	5	Fezf2-CreER;Ai166_358361-18047	18047			0	6511.32	15486	0	690.203	104.098	0	896.246	0	229.803	0	0	0	0	0	0	0	0	0	0	0	0	0	0	0	0	0	0	0	0	0	0	0	0	0	0	0	0	0
18047_00022	7012.2	1732.28	3260.73	fiber tracts	X	unknown	Fezf2-CreER;Ai166_358361-18047	18047			0	0	0	0	17056.4	0	0	0	1971.06	695.307	0	0	0	0	0	0	0	0	0	0	0	0	0	0	0	0	0	0	0	0	0	0	0	0	0	0	0	0	1829.94
18047_00025	5432.6	2077.07	5242.15	ACAv	ACAv	5	Fezf2-CreER;Ai166_358361-18047	18047			0	0	1953.48	0	0	0	0	0	0	0	0	0	0	0	0	0	0	0	0	0	0	0	0	0	0	4575.43	17735.6	0	0	0	0	0	0	0	0	1412.79	1864.94	5017.11	0
18047_00039	9330.88	3815.3	1657.03	fiber tracts	ProS	unknown	Fezf2-CreER;Ai166_358361-18047	18047			0	0	0	0	0	0	0	0	0	0	0	0	0	0	0	0	19.7214	0	0	0	0	0	0	0	0	0	0	0	0	0	0	0	0	0	0	0	0	0	0
18047_00047	2745.2	3090.4	5329.75	ORBm	ORBm	5	Fezf2-CreER;Ai166_358361-18047	18047			0	0	0	0	0	0	0	0	0	0	0	0	0	0	0	0	0	0	0	0	0	0	0	0	0	0	0	4141.5	1961.48	0	12092.6	548.025	0	0	0	0	0	0	0
18047_2443_x16061_y14812	2743.57	3071.8	5357	PL	ORBm	5	Fezf2-CreER;Ai166_358361-18047	18047			0	0	0	0	0	0	0	0	0	0	0	0	0	0	0	0	0	0	0	0	0	0	0	0	0	0	0	5592.04	2781.59	0	10014.9	0	0	0	0	0	0	0	0
18047_2622_x11862_y12983	3051.3	2495.25	4043.33	MOs	MOs	5	Fezf2-CreER;Ai166_358361-18047	18047			339.727	2953.97	23877.5	0	0	0	247.189	0	0	0	0	0	0	0	0	0	0	0	0	0	0	0	0	0	0	0	0	0	0	0	0	0	3045.78	0	0	0	0	0	0
18047_3132_x24052_y12385	3664.23	2328.98	3686.7	MOp	MOs	5	Fezf2-CreER;Ai166_358361-18047	18047			0	30045.6	22967.3	0	0	0	37.5169	0	0	0	0	0	0	0	0	0	0	0	0	0	0	0	0	0	0	0	0	0	0	0	0	0	245.144	0	0	0	0	0	0
18047_4141_x14168_y9063	4980.08	1358.07	4792.5	MOs	MOs	5	Fezf2-CreER;Ai166_358361-18047	18047	CTX_ET	TPC_com	0	5390.32	16438.1	0	549.043	112.306	0	898.048	0	259.782	0	0	0	0	0	0	0	0	0	0	0	0	0	0	0	0	0	0	0	0	0	0	0	0	0	0	0	0	0
18047_4458_x18853_y10785	5416.48	2089.6	5211.08	ACAv	ACAv	5	Fezf2-CreER;Ai166_358361-18047	18047			0	0	2023.54	0	0	0	0	0	0	0	0	0	0	0	0	0	0	0	0	0	0	0	0	0	0	5682.95	16450.2	0	0	0	0	0	0	0	0	1511.63	2107.58	4684.47	0
18047_5719_x25513_y7957	7014.33	1733.97	3260.43	fiber tracts	SSp-un	unknown	Fezf2-CreER;Ai166_358361-18047	18047			0	0	0	0	16828.3	0	0	0	1956.25	669.45	0	0	0	0	0	0	0	0	0	0	0	0	0	0	0	0	0	0	0	0	0	0	0	0	0	0	0	0	1876
18047_7769_x31046_y13195	9339.33	3811.32	1624.95	ENTl	ENTl	6a	Fezf2-CreER;Ai166_358361-18047	18047			0	0	0	0	0	0	0	0	0	0	0	0	0	0	0	0	0	0	0	0	0	0	0	0	9.97378	0	0	0	0	0	0	0	0	0	0	0	0	0	0
182725_2241_x9113_y11193	2937.32	3042.32	3609.82	MOs	MOs	5	Fezf2-CreER;Ai166_405429-182725	182725	CTX_ET	TPC_sim	1613.91	14130	38749.4	0	0	0	1612.72	0	0	0	0	1210.14	0	0	0	0	0	0	0	0	0	0	0	0	0	0	0	0	0	349.246	0	0	68.3136	0	0	0	0	0	0
182725_2376_x10033_y10786	3177.35	3457.93	3397.05	MOs	MOp	5	Fezf2-CreER;Ai166_405429-182725	182725	CTX_ET	TPC_com	0	12724.2	16903.2	0	0	0	1977.43	0	0	0	1264	0	0	0	0	0	0	0	0	0	0	0	0	0	0	0	0	0	0	0	0	0	2210.3	0	0	0	0	0	0
182725_2390_x8944_y12077	2956.45	2971.73	3922.25	MOs	MOs	6a	Fezf2-CreER;Ai166_405429-182725	182725			736.475	4540.65	18351.4	0	0	0	1228.54	0	0	0	1370.22	0	0	0	0	0	0	0	0	0	0	0	0	0	0	0	0	0	0	106.503	0	0	696.814	0	0	0	0	0	0
182725_2581_x9375_y21137	2992.45	4074.05	3651.65	AId	AIv	5	Fezf2-CreER;Ai166_405429-182725	182725			0	0	259.579	0	0	0	0	0	0	0	496.329	1807.1	0	0	0	0	0	0	0	0	0	0	0	0	0	0	0	0	0	13063.3	0	0	15867.9	0	5836.68	0	0	0	0
182725_2917_x9391_y22263	3379.57	4235.77	3063.33	AId	AId	5	Fezf2-CreER;Ai166_405429-182725	182725			0	190.924	368.775	0	0	0	0	0	0	0	0	341.518	0	0	0	0	0	0	0	0	0	0	0	0	0	0	0	0	0	0	0	0	37893.5	1393.64	0	0	0	0	0
182725_3680_x13452_y7614	5045.08	4759.6	2040.25	GU	GU	5	Fezf2-CreER;Ai166_405429-182725	182725		TPC_com	0	0	0	0	0	0	0	0	0	0	449.177	23838.3	2387.31	0	0	0	0	0	0	0	0	0	0	0	0	0	0	0	0	0	0	0	1397.81	5065.94	0	0	0	0	0
182725_3762_x5563_y19178	4698.92	1949.05	4068.48	MOp	MOp	5	Fezf2-CreER;Ai166_405429-182725	182725	CTX_ET	TPC_com	0	26466.3	4304.83	1858.87	6571.79	59.8034	128.668	5839.92	0	2037	0	185.453	0	0	0	0	0	0	0	0	0	0	0	0	0	0	0	0	0	0	0	0	764.739	0	79.5892	0	0	0	0
182725_4080_x6576_y11407	5399.9	1535.32	4520.8	MOp	MOp	5	Fezf2-CreER;Ai166_405429-182725	182725	CTX_ET	TPC_com	0	22992.8	2226.17	0	0	2836.44	0	1797.87	0	0	0	0	0	0	0	0	0	0	0	0	0	0	0	0	0	0	0	0	0	0	0	0	0	0	0	0	0	0	0
182725_4160_x5717_y19181	5259.92	2060.65	4094.15	MOp	MOp	6a	Fezf2-CreER;Ai166_405429-182725	182725			0	16400.1	2423.15	0	0	1487.08	0	4496.49	0	233.243	0	69.926	0	0	0	0	0	0	0	0	0	0	0	0	0	0	0	0	0	0	0	0	0	0	0	0	0	0	0
182725_4290_x5671_y18488	5431.92	1953.43	4325.55	MOp	MOp	5	Fezf2-CreER;Ai166_405429-182725	182725	CTX_ET	TPC_com	0	14677.5	5637.07	0	0	1684.11	0	2570.52	0	129.524	606.808	0	0	0	0	0	0	0	0	0	0	0	0	0	0	58.9794	0	0	0	0	0	0	0	0	0	0	0	0	0
182725_4390_x5078_y18459	5489.73	1631.12	4254	MOp	SSp-ll	5	Fezf2-CreER;Ai166_405429-182725	182725	CTX_ET	TPC_sim	0	11913.5	0	0	0	1981.8	0	0	0	0	89.8881	29.9976	0	0	0	0	0	0	0	0	0	0	0	0	0	0	0	0	0	0	0	0	0	0	0	0	0	0	0
182725_5012_x5980_y10427	6552.12	1277.18	4355.02	SSp-tr	SSp-ll	5	Fezf2-CreER;Ai166_405429-182725	182725	CTX_ET	TPC_com	0	2317.05	1118.36	0	0	1922.77	0	0	13581.5	0	0	0	0	0	0	0	0	0	1765.81	0	0	0	0	0	0	310.13	0	0	0	0	0	0	0	0	0	2285.66	277.505	0	357.422
182725_6819_x6109_y7853	8670.53	1163.35	3313.1	VISp	VISp	5	Fezf2-CreER;Ai166_405429-182725	182725			0	0	0	0	0	0	0	0	0	0	0	0	0	0	0	0	0	0	0	0	18129.9	0	0	0	0	0	0	0	0	0	0	0	0	0	0	0	0	571.003	0
182725_7341_x4593_y22594	9056.5	2233.4	1862.4	VISli	VISli	5	Fezf2-CreER;Ai166_405429-182725	182725		TPC_com	0	0	0	0	0	0	0	0	0	0	0	0	0	0	0	0	0	0	0	714.26	0	0	0	10659.5	2651.22	0	0	0	0	0	0	0	0	0	0	0	0	0	0
18452_3926_x14445_y21337	4391.98	7196.4	4288.65	OT	OT	unknown	Cux2-CreERT2;Ai166_374707-18452	18452			0	0	0	0	0	0	0	0	0	0	0	0	0	0	0	0	0	0	0	0	0	0	0	0	0	0	0	0	0	0	0	0	0	0	0	0	0	0	0
18452_4002_x10332_y17479	4941.4	5772.67	2941.52	fiber tracts	EPd	unknown	Cux2-CreERT2;Ai166_374707-18452	18452			0	0	0	0	0	0	0	0	0	0	0	0	0	0	0	0	0	0	0	0	0	0	0	0	0	0	0	0	0	0	0	0	0	0	0	0	0	0	0
18452_4126_x15225_y20986	4663.9	7141.73	4555.17	OT	OT	unknown	Cux2-CreERT2;Ai166_374707-18452	18452			0	0	0	0	0	0	0	0	0	0	0	0	0	0	0	0	0	0	0	0	0	0	0	0	0	0	0	0	0	0	0	0	0	0	0	0	0	0	0
18452_4272_x26686_y20064	5028.3	6630.95	3095.12	OT	PIR	unknown	Cux2-CreERT2;Ai166_374707-18452	18452			0	0	0	0	0	0	0	0	0	0	0	0	0	0	0	0	0	0	0	0	0	0	0	0	0	0	0	0	0	0	0	0	0	0	0	0	0	0	0
18452_4536_x11274_y21067	5553.52	7058.65	3169.23	PAA	OT	unknown	Cux2-CreERT2;Ai166_374707-18452	18452			0	0	0	0	0	0	0	0	0	0	0	0	0	0	0	0	0	0	0	0	0	0	0	0	0	0	0	0	0	0	0	0	0	0	0	0	0	0	0
18452_5511_x26566_y3403	6867.98	818.15	3396.25	SSp-tr	SSp-tr	2/3	Cux2-CreERT2;Ai166_374707-18452	18452			0	0	0	0	0	857.432	0	0	23817.5	165.636	0	0	0	0	0	0	0	0	0	0	0	0	0	0	0	0	0	0	0	0	0	0	0	0	0	319.59	69.5419	0	4768.11
18452_7249_x11408_y2071	9767.47	693.425	3659.02	unknown	VISp	2/3	Cux2-CreERT2;Ai166_374707-18452	18452			0	0	0	0	0	0	0	0	0	0	0	0	0	0	0	79.947	0	0	0	498.511	19361.2	0	39.8149	319.78	239.556	0	0	0	0	0	0	0	0	0	0	539.581	0	0	0
18453_1641_x24165_y10580	2337.43	2981.57	3553.25	MOs	MOs	2/3	Cux2-CreERT2;Ai166_374712-18453	18453	CTX_IT		99.8909	29112	34786.7	0	0	0	0	335.246	0	0	0	0	0	0	0	0	0	0	0	0	0	0	0	0	0	0	0	0	0	0	0	0	6038.46	0	0	0	0	0	0
18453_1643_x24077_y11694	2307.07	3396.85	3553.52	MOs	MOs	2/3	Cux2-CreERT2;Ai166_374712-18453	18453	CTX_IT		2023.1	16869	42669.4	0	0	0	1340.6	0	0	0	0	0	0	0	0	0	0	0	0	0	0	0	0	0	0	0	0	0	0	9.99956	0	0	19917.3	0	29.9812	0	0	0	0
18453_1674_x14446_y9719	2176.25	2798.8	4442.48	FRP	FRP	2/3	Cux2-CreERT2;Ai166_374712-18453	18453			27720.4	2214.94	24194.6	0	0	0	0	0	0	0	0	0	0	0	0	0	0	0	0	0	0	0	0	0	0	486.78	189.689	0	409.449	7483.45	0	454.091	6093.69	0	326.947	0	0	0	0
18453_1924_x22284_y8069	2831.85	1994.9	4329.52	MOs	MOs	2/3	Cux2-CreERT2;Ai166_374712-18453	18453	CTX_IT		1966.84	0	44739	0	0	0	0	0	0	0	0	0	0	0	0	0	0	0	0	0	0	0	0	0	0	0	0	627.404	0	567.707	0	848.026	3021.6	0	59.9903	0	0	0	0
18453_2190_x23739_y8507	3293.48	2130.68	3862.25	MOs	MOs	2/3	Cux2-CreERT2;Ai166_374712-18453	18453	CTX_IT		2150.26	23534.6	32247.6	0	0	0	57.2935	1737.09	0	0	0	0	0	0	0	0	0	0	0	0	0	0	0	0	0	0	179.817	0	0	0	0	0	1524.19	0	0	0	0	0	0
18453_2400_x15836_y7243	3328.18	1737.45	4907.55	MOs	MOs	2/3	Cux2-CreERT2;Ai166_374712-18453	18453	CTX_IT		1517.63	592.818	48039.7	0	0	0	0	0	0	0	0	0	0	0	0	0	0	0	926.688	0	379.154	0	408.217	0	0	3078.73	878.094	1276.87	0	3507.72	409.602	1787.98	119.43	0	1045.4	0	0	0	0
18453_2428_x13810_y8197	3312.98	2152.07	4285.08	MOs	MOs	4	Cux2-CreERT2;Ai166_374712-18453	18453	CTX_IT		1413.32	2515.32	32466.8	5575.47	0	0	1178.52	579.434	0	59.9295	3420.04	0	0	0	0	0	0	0	0	0	0	0	0	0	0	0	688.384	0	0	1754.9	0	0	69.2393	0	0	0	0	0	0
18453_2632_x11687_y8383	3434.1	2314.57	3556.08	MOs	MOs	2/3	Cux2-CreERT2;Ai166_374712-18453	18453	CTX_IT		0	18559.2	29343.2	0	0	0	0	0	0	0	0	0	0	0	0	0	0	0	0	0	0	0	0	0	0	0	549.068	0	0	0	0	0	1879.55	0	0	0	0	0	0
18453_2645_x28684_y11703	3710.3	3379.4	2203.93	SSp-m	MOp	2/3	Cux2-CreERT2;Ai166_374712-18453	18453	CTX_IT		0	26484.1	9835.4	0	0	0	22555.2	0	0	0	4756.92	2195.53	1410.06	0	0	0	0	0	0	0	0	0	0	0	0	0	0	0	0	0	0	0	0	0	0	0	0	0	0
18453_2713_x27713_y9899	3961.57	2674.1	2610	MOp	MOp	2/3	Cux2-CreERT2;Ai166_374712-18453	18453	CTX_IT		0	30306.7	7113.54	0	0	0	11478.7	4901.39	0	0	1489.01	819.369	119.677	0	0	0	0	0	0	0	0	0	0	0	0	0	9.99983	0	0	0	0	0	114.203	0	0	0	0	0	0
18453_2884_x12998_y7285	3894.02	1792.15	4023.15	MOs	MOs	2/3	Cux2-CreERT2;Ai166_374712-18453	18453	CTX_IT		0	22080.7	32381.3	0	0	0	3689.94	2148.86	0	213.29	0	0	0	0	0	0	0	0	0	0	0	0	0	0	0	0	687.769	0	0	0	0	109.875	0	0	0	0	0	0	0
18453_2991_x13607_y7348	4078.5	1832.07	4228.98	MOs	MOs	2/3	Cux2-CreERT2;Ai166_374712-18453	18453	CTX_IT		3488.46	2416.93	31371.6	0	0	0	5495.46	697.689	0	99.569	0	0	0	0	0	0	0	0	0	0	0	0	0	0	0	0	249.42	0	0	0	0	0	0	0	0	0	0	0	0
18453_3021_x27493_y8943	4465.55	2270.07	2794.43	SSp-m	MOp	2/3	Cux2-CreERT2;Ai166_374712-18453	18453	CTX_IT		0	29012	15644.3	0	0	0	24538.4	9062.41	0	0	0	0	0	0	0	0	0	0	0	0	0	0	0	0	0	0	69.8399	0	0	0	0	0	2441.46	0	0	0	0	0	0
18453_3147_x16721_y20510	3833.73	6878.9	5335.1	unknown	OT	unknown	Cux2-CreERT2;Ai166_374712-18453	18453			0	0	0	0	0	0	0	0	0	0	0	0	0	0	0	0	0	0	0	0	0	0	0	0	0	0	0	0	0	0	0	0	0	0	0	0	0	0	0
18453_3186_x12745_y7108	4284.23	1762.47	3936.77	MOp	MOp	2/3	Cux2-CreERT2;Ai166_374712-18453	18453	CTX_IT		0	7055.56	569.446	0	0	0	0	0	0	0	0	0	0	0	0	0	0	0	0	0	0	0	0	0	0	0	0	0	0	0	0	0	0	0	0	0	0	0	0
18453_3218_x16785_y20581	3904.43	6908.73	5347.25	unknown	OT	unknown	Cux2-CreERT2;Ai166_374712-18453	18453			0	0	0	0	0	0	0	0	0	0	0	0	0	0	0	0	0	0	0	0	0	0	0	0	0	0	0	0	0	0	0	0	0	0	0	0	0	0	0
18453_3225_x17398_y19713	3976.3	6561.85	5535.9	unknown	OT	unknown	Cux2-CreERT2;Ai166_374712-18453	18453			0	0	0	0	0	0	0	0	0	0	0	0	0	0	0	0	0	0	0	0	0	0	0	0	0	0	0	0	0	0	0	0	0	0	0	0	0	0	0
18453_3316_x8214_y11076	4213.52	3665.23	2115.8	SSp-m	SSp-m	4	Cux2-CreERT2;Ai166_374712-18453	18453	CTX_IT		0	1144.4	0	0	0	0	25108.5	0	0	0	1124.4	1113.58	0	0	0	0	0	0	0	0	0	0	0	0	0	0	0	0	0	0	0	0	0	0	0	0	0	0	0
18453_3326_x29413_y10076	4709.3	2744.93	2172.77	SSp-m	SSp-m	4	Cux2-CreERT2;Ai166_374712-18453	18453	CTX_IT		0	0	0	9.99625	0	0	23429.9	0	0	0	0	0	0	0	0	0	0	0	0	0	0	0	0	0	0	0	0	0	0	0	0	0	0	0	0	0	0	0	0
18453_3350_x8925_y9653	4250.58	3080.75	2416.05	SSp-m	SSp-m	4	Cux2-CreERT2;Ai166_374712-18453	18453	CTX_IT		0	9.99769	0	0	0	0	46085.1	0	0	0	0	0	0	0	0	0	0	0	0	0	0	0	0	0	0	0	0	0	0	0	0	0	0	0	0	0	0	0	0
18453_3456_x24161_y6646	4955.9	1429.22	4009.68	MOp	MOp	2/3	Cux2-CreERT2;Ai166_374712-18453	18453	CTX_IT		0	34360.3	4828.75	0	0	89.6778	0	7104.03	0	2490.32	0	0	0	0	0	0	0	0	0	0	0	0	0	0	0	0	159.853	0	0	0	0	0	0	0	0	0	0	0	0
18453_3471_x28224_y8289	5060.05	2027.95	2675.38	SSp-m	SSp-ul	4	Cux2-CreERT2;Ai166_374712-18453	18453	CTX_IT		0	10.0008	0	359.215	0	0	17135.5	2337.87	0	8141.24	0	0	0	0	0	0	0	0	0	0	0	0	0	0	0	0	0	0	0	0	0	0	0	0	0	0	0	0	0
18453_3492_x29357_y9198	4988.3	2399.05	2248.52	SSp-m	SSp-m	4	Cux2-CreERT2;Ai166_374712-18453	18453	CTX_IT		0	0	0	1881.59	0	0	12914	0	0	0	0	0	0	0	0	0	0	0	0	0	0	0	0	0	0	0	0	0	0	0	0	0	0	0	0	0	0	0	0
18453_3516_x21006_y6048	4847.85	1320.5	4946.95	MOs	MOs	2/3	Cux2-CreERT2;Ai166_374712-18453	18453	CTX_IT		0	6460.92	41606.7	0	3255.99	1651.48	0	289.375	946.794	0	0	0	0	0	0	0	0	2146.41	1096.63	453.53	2641.64	0	667.777	288.208	0	4006.21	109.942	87.5274	0	0	0	0	0	0	0	898.899	0	0	1054.24
18453_3564_x30226_y9677	5001.55	2584.3	1948.25	SSp-m	SSp-m	4	Cux2-CreERT2;Ai166_374712-18453	18453	CTX_IT		0	17912.9	6950.27	2688.52	0	0	22778.8	294.86	0	0	757.21	0	0	0	0	0	0	0	0	0	0	0	0	0	0	0	0	0	0	0	0	0	0	0	0	0	0	0	0
18453_3579_x30397_y10103	4978.1	2747.23	1889.55	SSp-m	SSp-m	4	Cux2-CreERT2;Ai166_374712-18453	18453	CTX_IT		0	0	0	1050.92	0	0	28494	0	0	0	7563.65	0	0	0	0	0	0	0	0	0	0	0	0	0	0	0	0	0	0	0	0	0	0	0	0	0	0	0	0
18453_3678_x8938_y8684	4676.7	2715.05	2422.5	SSp-m	SSp-m	4	Cux2-CreERT2;Ai166_374712-18453	18453	CTX_IT		0	0	0	0	0	0	20114.4	0	0	0	0	0	0	0	0	0	0	0	0	0	0	0	0	0	0	0	0	0	0	0	0	0	0	0	0	0	0	0	0
18453_3690_x8282_y9898	4705.6	3232.52	2171.38	SSp-m	SSp-m	4	Cux2-CreERT2;Ai166_374712-18453	18453	CTX_IT		0	0	0	0	0	0	30810.5	0	0	0	1194.65	0	0	0	0	0	0	0	0	0	0	0	0	0	0	0	0	0	0	0	0	0	0	0	0	0	0	0	0
18453_3704_x10450_y7387	4796.95	2054.82	3070.5	SSp-ul	SSp-m	4	Cux2-CreERT2;Ai166_374712-18453	18453	CTX_IT		0	16451.2	0	0	0	0	2534.92	30121.9	0	209.013	0	0	0	0	0	0	0	0	0	0	0	0	0	0	0	0	0	0	0	0	0	0	0	0	0	0	0	0	0
18453_3766_x16118_y20931	4521.52	7170.33	5047.35	unknown	OT	unknown	Cux2-CreERT2;Ai166_374712-18453	18453			0	0	0	0	0	0	0	0	0	0	0	0	0	0	0	0	0	0	0	0	0	0	0	0	0	0	0	0	0	0	0	0	0	0	0	0	0	0	0
18453_3767_x22604_y5643	5231.08	1136.62	4516.95	MOp	MOp	2/3	Cux2-CreERT2;Ai166_374712-18453	18453	CTX_IT		0	16796.4	16508.8	0	0	1219.83	0	169.846	858.62	0	0	0	0	0	0	0	0	0	271.411	0	0	0	0	0	0	1358.09	0	2085.11	0	0	0	0	0	0	0	2732.19	3600.7	0	449.036
18453_3795_x13584_y5960	5084.35	1361.75	4159.7	MOp	MOp	2/3	Cux2-CreERT2;Ai166_374712-18453	18453	CTX_IT		0	31319.7	20225.9	0	0	5052.21	0	3784.85	0	0	0	0	0	0	0	0	0	0	0	0	0	0	0	0	0	3295.03	669.413	457.166	0	0	0	0	0	0	0	0	0	0	0
18453_3796_x16246_y20830	4555.4	7132.42	5082.5	unknown	OT	unknown	Cux2-CreERT2;Ai166_374712-18453	18453			0	0	0	0	0	0	0	0	0	0	0	0	0	0	0	0	0	0	0	0	0	0	0	0	0	0	0	0	0	0	0	0	0	0	0	0	0	0	0
18453_3810_x16082_y20891	4573.65	7163.52	5026.27	unknown	OT	unknown	Cux2-CreERT2;Ai166_374712-18453	18453			0	0	0	0	0	0	0	0	0	0	0	0	0	0	0	0	0	0	0	0	0	0	0	0	0	0	0	0	0	0	0	0	0	0	0	0	0	0	0
18453_3841_x9500_y7920	4864.05	2210.62	2549.28	SSp-m	SSp-m	4	Cux2-CreERT2;Ai166_374712-18453	18453	CTX_IT		0	870.554	0	58.9258	0	0	21372.8	1301.54	0	338.665	0	0	0	0	0	0	0	0	0	0	0	0	0	0	0	0	0	0	0	0	0	0	0	0	0	0	0	0	0
18453_3848_x19057_y7025	5231.65	1851.85	5580.08	ACAv	ACAv	1	Cux2-CreERT2;Ai166_374712-18453	18453			0	0	1564.33	0	0	0	0	0	0	0	0	0	0	0	0	0	0	0	0	0	0	0	0	0	0	15370.6	10514.3	0	0	0	0	0	0	0	0	0	0	308.46	0
18453_3935_x22928_y21885	4940.27	7327.9	4018.68	OT	OT	unknown	Cux2-CreERT2;Ai166_374712-18453	18453			0	0	0	0	0	0	0	0	0	0	0	0	0	0	0	0	0	0	0	0	0	0	0	0	0	0	0	0	0	0	0	0	0	0	0	0	0	0	0
18453_3945_x11262_y6434	5151	1638.57	3375.2	SSp-ul	SSp-ul	2/3	Cux2-CreERT2;Ai166_374712-18453	18453	CTX_IT		0	12036.9	0	0	0	1206.95	339.406	20491.6	0	0	11190.3	0	0	0	0	0	0	0	0	0	0	0	0	0	0	0	0	0	0	0	0	0	0	0	0	0	0	0	0
18453_4067_x16924_y5288	5478.65	1146.55	5157.85	MOs	MOp	2/3	Cux2-CreERT2;Ai166_374712-18453	18453	CTX_IT		329.646	364.971	39406.6	0	0	0	0	0	0	0	0	0	0	0	0	0	0	0	0	0	0	0	0	0	0	9191.06	1098.79	1515.66	0	0	119.932	0	0	0	0	0	5359.84	4101.28	0
18453_4186_x30783_y11697	5678.77	3291.85	1922.8	SSs	SSs		Cux2-CreERT2;Ai166_374712-18453	18453	CTX_IT		0	42281.4	12610.2	11950.4	0	0	38735.8	1034.74	0	1439.39	26214.5	0	0	0	0	0	0	0	0	0	0	0	0	0	0	0	0	0	0	0	0	0	0	0	0	0	0	0	0
18453_4221_x16935_y5165	5673.33	1131.62	5152.98	MOs	MOp	2/3	Cux2-CreERT2;Ai166_374712-18453	18453	CTX_IT		0	1096.72	17307	0	0	0	0	0	0	0	0	0	0	0	0	0	0	307.553	2221.45	0	776.681	0	29.9166	0	0	11471.6	2040.17	318.196	0	0	0	0	0	0	0	413.968	6979.83	5994.08	2378.48
18453_4231_x30739_y8470	5891.77	2161.4	1903.97	SSp-n	SSp-n	4	Cux2-CreERT2;Ai166_374712-18453	18453	CTX_IT		0	0	0	20637.9	1742.42	0	0	0	0	0	2549.87	0	0	0	0	0	0	0	0	0	0	0	0	0	0	0	0	0	0	0	0	0	0	0	0	0	0	0	0
18453_4283_x7543_y12923	5452.55	4474.35	2031.3	VISC	VISC	6a	Cux2-CreERT2;Ai166_374712-18453	18453			0	14932.5	4871.97	388.876	0	0	6999.16	3491.29	0	0	44391.9	15923.5	11359.7	0	0	0	0	0	0	0	0	0	0	0	0	0	0	0	0	0	0	0	0	4290.45	0	0	0	0	0
18453_4283_x7739_y13735	5443.08	4793.23	2123.67	CLA	AIp	6a	Cux2-CreERT2;Ai166_374712-18453	18453			3280.29	32128.9	64258.9	0	0	0	3378.54	2122.19	0	0	5096.98	8615.53	3267.12	0	0	0	0	0	0	0	0	0	0	0	0	0	0	0	0	725.741	0	0	20787.2	13642.8	837.85	0	0	0	0
18453_4345_x12044_y5189	5679.4	1193.97	3614.92	SSp-ll	SSp-ul	2/3	Cux2-CreERT2;Ai166_374712-18453	18453	CTX_IT		0	2717.38	7140.25	0	10.0077	12635.7	0	12550.7	0	428.858	0	0	0	0	0	0	0	0	0	0	0	0	0	0	0	169.285	99.6498	0	0	0	0	0	0	129.401	0	0	0	0	0
18453_4386_x31552_y9254	6017.33	2432.98	1625.6	SSp-n	SSp-n	4	Cux2-CreERT2;Ai166_374712-18453	18453	CTX_IT		0	0	0	15089.7	2163.92	0	0	0	0	0	1310.41	0	0	0	0	0	0	0	0	0	0	0	0	0	0	0	0	0	0	0	0	0	0	0	0	0	0	0	0
18453_4403_x30609_y7732	6139.48	1925.68	1991.6	SSp-bfd	SSp-bfd	4	Cux2-CreERT2;Ai166_374712-18453	18453	CTX_IT		0	0	0	553.772	24834.4	0	0	0	0	0	0	0	0	0	0	0	0	0	0	0	0	0	0	0	0	0	0	0	0	0	0	0	0	0	0	0	0	0	0
18453_4496_x31014_y8304	6204.42	2129.98	1850.32	SSp-bfd	SSp-n	4	Cux2-CreERT2;Ai166_374712-18453	18453	CTX_IT		0	0	0	1584.21	21575.3	0	0	0	0	0	0	0	0	0	0	0	0	0	0	0	0	0	0	0	0	0	0	0	0	0	0	0	0	0	0	0	0	0	0
18453_4497_x29287_y7176	6248.58	1771.47	2550.3	SSp-bfd	SSp-bfd	4	Cux2-CreERT2;Ai166_374712-18453	18453	CTX_IT		0	0	0	0	20108.4	0	0	0	0	69.3218	0	0	0	0	0	0	0	0	0	0	0	0	0	0	0	0	0	0	0	0	0	0	0	0	0	0	0	0	0
18453_4540_x32498_y9442	6156.95	2484.73	1296.88	SSs	SSp-n	2/3	Cux2-CreERT2;Ai166_374712-18453	18453	CTX_IT		0	0	0	10487.3	15471.3	0	69.844	0	0	0	23726	0	6249.18	0	0	0	0	0	0	0	0	0	0	0	0	0	0	0	0	0	0	0	0	227.911	0	0	0	0	0
18453_4693_x33039_y11636	6256.08	3225.43	1138.7	SSs	SSs	2/3	Cux2-CreERT2;Ai166_374712-18453	18453	CTX_IT		0	0	0	299.781	2399.83	0	1661.09	507.378	0	4509.25	33307.7	0	0	1859.23	0	0	654.168	0	0	0	0	0	0	0	0	0	0	0	0	0	0	0	0	0	0	0	0	0	0
18453_4711_x14090_y3943	6251.02	724.075	4248.3	SSp-tr	SSp-ll	2/3	Cux2-CreERT2;Ai166_374712-18453	18453	CTX_IT		0	8774.04	567.799	0	0	11243.4	0	99.8873	6532.63	0	0	0	0	0	0	0	0	0	0	0	0	0	0	0	0	0	0	0	0	0	0	0	0	0	0	1492.97	20.0036	0	199.856
18453_4725_x30684_y6703	6539.8	1593.43	2047.18	SSp-bfd	SSp-bfd	2/3	Cux2-CreERT2;Ai166_374712-18453	18453	CTX_IT		0	5796.58	10544.7	2715.41	27882.1	288.369	0	887.654	0	358.579	1514.4	0	0	0	0	0	0	0	0	0	0	0	0	0	0	0	0	0	0	0	0	0	0	0	0	0	0	0	0
18453_4749_x31789_y8895	6477.15	2350.1	1594.38	SSp-bfd	SSp-n	4	Cux2-CreERT2;Ai166_374712-18453	18453	CTX_IT		0	0	0	287.913	15502.8	0	0	0	0	0	1837.95	0	0	0	0	0	0	0	0	0	0	0	0	0	0	0	0	0	0	0	0	0	0	0	0	0	0	0	0
18453_4899_x10111_y5917	6204.17	1709.7	2948.15	SSp-bfd	SSp-bfd	4	Cux2-CreERT2;Ai166_374712-18453	18453	CTX_IT		0	0	0	0	18364.1	0	0	1401.3	0	7123.03	0	0	0	0	0	0	0	0	0	0	0	0	0	0	0	0	0	0	0	0	0	0	0	0	0	0	0	0	0
18453_5033_x32118_y8975	6823.9	2423.07	1503.15	SSs	SSs	4	Cux2-CreERT2;Ai166_374712-18453	18453	CTX_IT		0	0	0	0	5088.43	0	0	0	0	0	15954.1	0	0	0	0	0	0	0	0	0	0	0	0	0	0	0	0	0	0	0	0	0	0	0	0	0	0	0	0
18453_5113_x9557_y5782	6440.4	1711.57	2732.35	SSp-bfd	SSp-bfd	4	Cux2-CreERT2;Ai166_374712-18453	18453	CTX_IT		0	0	0	0	23158.3	0	0	0	0	872.107	315.538	0	0	0	0	0	0	0	0	0	0	0	0	0	0	0	0	0	0	0	0	0	0	0	0	0	0	0	0
18453_5228_x9833_y5221	6588.05	1498.82	2817	SSp-bfd	SSp-bfd	2/3	Cux2-CreERT2;Ai166_374712-18453	18453	CTX_IT		0	0	0	0	19221.3	0	0	1538.9	0	3927.39	9561.35	0	0	0	0	0	0	0	0	0	0	0	0	0	0	0	0	0	0	0	0	0	0	0	0	0	0	0	0
18453_5308_x10321_y5166	6682.98	1502.05	3006.1	SSp-bfd	SSp-bfd	4	Cux2-CreERT2;Ai166_374712-18453	18453	CTX_IT		0	0	0	0	15729.1	0	0	0	0	217.084	0	0	0	0	0	0	0	0	0	0	0	0	0	0	0	0	0	0	0	0	0	0	0	0	0	0	0	0	0
18453_5317_x24548_y3717	7299.05	628.275	4273.55	VISam	VISam	4	Cux2-CreERT2;Ai166_374712-18453	18453			0	0	0	0	0	0	0	0	2157.6	0	0	0	0	0	0	0	0	0	9478.67	0	0	0	0	0	0	0	0	0	0	0	0	0	0	0	0	13776.9	1186.56	59.8192	9484.22
18453_5318_x33682_y14092	6996.02	4046.48	1130.03	VISC	VISC	5	Cux2-CreERT2;Ai166_374712-18453	18453			0	3365.4	8587.17	1987.88	5835.48	0	376.973	3711.72	0	9651.87	6949.19	0	10492.5	249.584	0	0	1143.55	0	0	0	0	0	0	0	0	0	0	0	0	0	0	0	0	651.467	0	0	0	0	0
18453_5325_x32314_y8395	7224.67	2307.62	1452.22	SSs	SSs	4	Cux2-CreERT2;Ai166_374712-18453	18453	CTX_IT		0	0	0	0	3216.67	0	0	0	2460.52	407.783	14500.6	0	0	1409.15	0	0	0	0	0	0	0	0	0	0	0	0	0	0	0	0	0	0	0	0	0	0	0	0	2320.63
18453_5343_x23330_y3366	7323.92	515.7	4599.55	RSPagl	RSPagl	2/3	Cux2-CreERT2;Ai166_374712-18453	18453			0	308.824	1468.68	0	0	0	0	0	0	0	0	0	0	0	0	0	0	0	547.672	0	0	0	0	0	0	2616.62	7933.13	0	0	0	0	0	0	0	0	17218.5	9762.56	1316.72	0
18453_5436_x32746_y12751	7112.48	3495.25	1695.15	SSs	SSs		Cux2-CreERT2;Ai166_374712-18453	18453	CTX_IT		0	1163.69	4492.94	1373.97	7636.47	8105.4	812.915	4518.7	23684	3415.8	14841.7	0	724.346	2198.87	727.083	994.332	5448.34	858.611	319.712	0	0	0	0	0	0	0	0	0	0	0	0	0	0	0	0	1755.14	3595.28	976.047	9533.59
18453_5459_x9646_y5477	6815.95	1688.93	2753.9	SSp-bfd	SSp-bfd	4	Cux2-CreERT2;Ai166_374712-18453	18453	CTX_IT		0	0	0	0	22877	0	0	0	0	0	0	0	0	0	0	0	0	0	0	0	0	0	0	0	0	0	0	0	0	0	0	0	0	0	0	0	0	0	0
18453_5535_x29214_y5045	7537.17	1106.38	2823.57	VISrl	SSp-bfd	4	Cux2-CreERT2;Ai166_374712-18453	18453	CTX_IT		0	0	0	0	4333.3	0	0	0	0	0	0	0	0	0	0	29.9975	0	3430.72	0	1366.35	1108	0	0	493.889	0	0	0	0	0	0	0	0	0	0	0	0	0	0	316.981
18453_5578_x32997_y13060	7246.42	3632.07	1596.15	AUDv	AUDv	6a	Cux2-CreERT2;Ai166_374712-18453	18453			0	2475.51	7757.54	0	9002.85	149.339	0	3951.76	832.972	2218.34	9341.07	672.785	3006	2741.79	1265.91	1124.09	7083.18	1071.62	270.115	681.303	3609.9	4897.38	248.877	0	1306.48	0	0	0	0	0	0	0	419.165	0	2213.81	449.398	1326.27	0	4488.1
18453_5667_x25695_y3103	7798.27	402.475	3963.45	VISam	VISam	2/3	Cux2-CreERT2;Ai166_374712-18453	18453			0	199.415	6412.19	0	0	39.992	0	336.383	788.23	39.7581	0	0	0	48.993	0	2308.32	0	1303.86	14095.1	903.262	1469.8	0	1665.21	837.841	931.292	9602.73	0	0	0	0	0	0	0	0	0	872.839	139.572	0	1501.64
18453_5701_x28505_y4297	8493.6	3106.88	671.325	AUDv	VISrl	2/3	Cux2-CreERT2;Ai166_374712-18453	18453			0	0	0	0	0	0	0	0	0	0	0	0	0	0	1270.43	258.109	21717.6	0	0	0	830.553	0	169.935	0	89.9082	0	0	0	0	0	0	0	0	0	0	0	0	890.271	0
18453_5766_x31719_y6139	7911.98	1616.53	1686.65	VISal	SSs	2/3	Cux2-CreERT2;Ai166_374712-18453	18453	CTX_IT		0	0	0	0	3352.16	0	0	0	0	0	9057.65	0	0	7079.97	0	0	0	6175.61	0	599.246	99.9543	0	0	0	0	0	0	0	0	0	0	0	0	0	0	0	0	0	0
18453_5841_x19468_y3419	7939.85	731.975	5677.73	RSPv	RSPv	1	Cux2-CreERT2;Ai166_374712-18453	18453			0	0	0	0	0	0	0	0	0	0	0	0	0	0	0	0	0	0	0	0	0	0	0	0	0	0	0	0	0	0	0	0	0	0	0	0	0	3305	0
18453_5862_x33046_y12305	7744.9	3602.23	1506.97	AUDv	AUDv	6a	Cux2-CreERT2;Ai166_374712-18453	18453			0	584.686	2617.8	0	1494.96	935.731	0	346.719	0	168.905	2052.82	0	1113.16	1339.62	9615.7	2285.58	14802.8	3625.38	1559.3	390.771	6386.56	0	4643.84	267.32	4611.06	0	0	0	0	0	0	0	0	1573.2	0	2130.56	3907.62	0	270.894
18453_5941_x24629_y3152	8127.12	533.525	4309.23	VISpm	VISam	2/3	Cux2-CreERT2;Ai166_374712-18453	18453			0	0	0	0	0	0	0	0	0	0	0	0	0	0	0	0	0	0	8772.27	1763.91	2965.79	1692.19	10295.1	864.076	4831.9	0	0	0	0	0	0	0	0	0	0	6987.26	995.398	225.955	0
18453_5995_x24812_y3143	8200.65	540.85	4259.95	VISpm	VISam	2/3	Cux2-CreERT2;Ai166_374712-18453	18453			0	0	0	0	0	0	0	0	0	0	0	0	0	0	0	0	0	0	8942.23	2053.59	4408.66	4132.37	12968.9	957.02	1750.28	0	0	0	0	0	0	0	0	0	0	7063.36	893.838	299.496	0
18453_6040_x24821_y3042	8270.53	506.7	4257.77	VISpm	VISam	2/3	Cux2-CreERT2;Ai166_374712-18453	18453			0	0	0	0	0	0	0	0	0	0	0	0	0	0	0	0	0	0	4743.92	0	0	0	11951.1	0	0	496.994	4043.46	1827.65	0	0	0	0	0	0	0	10797	1943.83	452.049	0
18453_6053_x8032_y5933	7487.75	2008.78	2016.8	SSs	SSs	5	Cux2-CreERT2;Ai166_374712-18453	18453	CTX_IT		0	0	0	0	5839.96	89.3215	0	0	783.66	0	14891.9	0	0	808.226	0	0	0	0	0	0	0	0	0	0	0	0	0	0	0	0	0	0	0	0	0	0	0	39.9506	1144.98
18453_6181_x10238_y3690	7812.8	1031.62	2849	VISrl	VISrl	2/3	Cux2-CreERT2;Ai166_374712-18453	18453			0	0	3752.08	0	299.394	0	0	0	0	0	0	0	0	0	0	99.409	0	708.824	58.8212	0	11266.7	618.974	553.727	0	0	4574.86	169.304	0	0	0	0	0	0	0	0	359.332	9.53938	739.639	1287.03
18453_6229_x34471_y10482	8494.65	3108.27	670.75	AUDv	AUDv	1	Cux2-CreERT2;Ai166_374712-18453	18453			0	0	0	0	0	0	0	0	0	0	0	0	0	0	1273.21	277.225	21814.6	0	0	0	849.173	0	149.835	0	89.8094	0	0	0	0	0	0	0	0	0	0	0	0	863.091	0
18453_6316_x30559_y4743	8615.1	1184.22	2306.9	VISp	VISrl	2/3	Cux2-CreERT2;Ai166_374712-18453	18453			0	0	0	0	0	0	0	0	0	0	0	0	0	0	0	0	0	2048.47	0	4447.97	11598.8	0	0	0	0	0	0	0	0	0	0	0	0	0	0	0	0	0	0
18453_6477_x30376_y5078	8822.28	1390.3	2378.6	VISp	VISp	4	Cux2-CreERT2;Ai166_374712-18453	18453			0	0	0	0	892.935	0	0	0	0	0	0	0	0	0	0	0	0	564.575	0	3540.47	23858.1	0	0	0	0	0	0	0	0	0	0	0	0	0	0	0	0	0	0
18453_6479_x9010_y4330	8089.55	1382.05	2321.08	VISrl	VISal	2/3	Cux2-CreERT2;Ai166_374712-18453	18453			0	0	3888.14	0	2411.74	69.9891	0	0	398.235	0	0	0	0	0	0	0	0	3733.06	0	2720.52	10656.5	0	0	469.189	0	2417.74	0	0	0	0	0	0	0	0	0	0	0	0	0
18453_6500_x34303_y12884	8844.25	4007.48	743	ECT	TEa	2/3	Cux2-CreERT2;Ai166_374712-18453	18453			0	0	0	0	0	0	0	0	0	0	0	0	29.9624	0	0	0	1750.8	0	0	0	0	0	0	0	0	0	0	0	0	0	0	0	0	2655.34	0	0	0	0	0
18453_6537_x8725_y4484	8148.62	1471.45	2185.15	VISal	VISal	2/3	Cux2-CreERT2;Ai166_374712-18453	18453			0	0	0	0	625.686	0	0	0	0	0	0	0	0	69.2578	0	0	0	11793.8	267.361	8253.73	7667.22	1081.08	0	0	0	0	0	0	0	0	0	0	0	0	0	239.449	29.574	0	1497.9
18453_6561_x9442_y3817	8239.75	1178.05	2472.58	VISrl	VISrl	2/3	Cux2-CreERT2;Ai166_374712-18453	18453			0	0	0	0	0	0	0	0	0	0	0	0	0	0	0	0	0	2219.23	0	1233.8	15046	0	0	0	79.3828	0	0	0	0	0	0	0	0	0	0	0	0	949.182	593.447
18453_6576_x22528_y4353	8886.9	1123.05	4908.88	RSPv	RSPv	2/3	Cux2-CreERT2;Ai166_374712-18453	18453			0	0	0	0	0	0	0	0	0	0	0	0	0	0	0	0	0	0	0	0	0	0	0	0	0	0	0	0	0	0	0	0	0	0	0	0	195.154	9587.24	0
18453_6604_x9161_y4006	8278.03	1273.43	2342.67	VISrl	VISrl	2/3	Cux2-CreERT2;Ai166_374712-18453	18453			0	0	9582.11	0	3885.99	339.537	0	0	512.53	0	0	0	0	0	1437.31	389.64	534.911	5377.37	309.216	1711	13638.7	0	29.9555	428.75	0	4991.89	0	0	0	0	0	0	0	0	0	666.195	664.318	0	2939.26
18453_6675_x10576_y3102	8460.3	885.35	2884.1	VISp	VISp	2/3	Cux2-CreERT2;Ai166_374712-18453	18453			0	0	0	0	0	0	0	0	0	0	0	0	0	0	0	0	0	1533.1	1045.5	0	27583	0	1574.81	0	0	0	0	0	0	0	0	0	0	0	0	397.332	0	819.595	0
18453_6675_x8876_y4461	8327.12	1494.25	2230.08	VISal	VISal	4	Cux2-CreERT2;Ai166_374712-18453	18453			0	0	0	0	0	0	0	0	0	0	0	0	0	0	0	0	0	13242.9	0	2654.48	15204.8	0	567.182	0	0	0	0	0	0	0	0	0	0	0	0	0	0	1199.26	0
18453_6708_x6437_y7833	8283.45	2908.43	1382.5	AUDp	AUDp	4	Cux2-CreERT2;Ai166_374712-18453	18453			0	0	0	0	0	0	0	0	0	0	0	0	0	4973.2	45061.7	5129.87	5298.64	109.622	0	0	0	0	0	20.0052	0	0	0	0	0	0	0	0	0	0	0	0	0	1166.25	0
18453_6746_x8555_y4741	8402.47	1639.72	2082.58	VISal	VISl	2/3	Cux2-CreERT2;Ai166_374712-18453	18453			0	0	0	0	0	0	0	0	0	0	756.796	0	0	0	0	0	0	11834.5	0	1529.18	11220.3	0	408.781	69.1048	0	0	0	0	0	0	0	0	0	0	0	0	0	0	0
18453_6748_x28152_y3578	9172.12	817.35	3252.7	VISp	VISp	2/3	Cux2-CreERT2;Ai166_374712-18453	18453			0	0	0	0	0	0	0	0	0	0	0	0	0	0	0	0	0	0	0	0	28223.3	0	0	0	0	0	0	0	0	0	0	0	0	0	0	0	0	0	0
18453_6756_x7677_y5336	7773.88	985.025	2764.38	VISrl	VISrl	2/3	Cux2-CreERT2;Ai166_374712-18453	18453			0	0	0	0	6304.33	0	0	0	129.628	0	0	0	0	0	0	0	0	0	0	0	3319.94	0	0	0	0	0	0	0	0	0	0	0	0	0	0	0	0	0	2580.31
18453_6846_x11548_y2831	8769.12	822.3	3215.45	VISp	VISp	2/3	Cux2-CreERT2;Ai166_374712-18453	18453			0	0	0	0	0	0	0	0	0	0	0	0	0	0	0	0	0	0	0	0	28981.5	0	10.0004	0	0	0	0	0	0	0	0	0	0	0	0	0	668.67	78.7551	0
18453_7007_x11486_y3611	9006.92	1238.68	3240.33	VISp	VISp	4	Cux2-CreERT2;Ai166_374712-18453	18453			0	0	0	0	0	0	0	0	0	0	0	0	0	0	0	0	0	0	0	862.352	28971	0	0	0	0	0	0	0	0	0	0	0	0	0	0	239.407	1086.17	636.962	0
18453_7010_x8769_y4509	8784.78	1612.5	2123.53	VISl	VISp	2/3	Cux2-CreERT2;Ai166_374712-18453	18453			0	0	0	0	0	0	0	0	0	0	1879.81	0	0	577.431	109.666	699.827	688.984	3480.7	1940.49	18951.9	19450.7	0	4174.28	283.828	0	0	0	0	0	0	0	0	0	0	0	3126.31	0	0	0
18453_7024_x9012_y4138	8828.17	1456.9	2216.85	VISl	VISp	2/3	Cux2-CreERT2;Ai166_374712-18453	18453			0	0	0	0	0	0	0	0	0	0	0	0	0	0	0	9.99357	0	923.136	0	8114.46	8648.95	618.813	0	378.876	249.203	0	0	0	0	0	0	0	0	0	0	0	0	3513.17	0
18453_7112_x9089_y4667	8962.7	1735.43	2276.05	VISl	VISp	4	Cux2-CreERT2;Ai166_374712-18453	18453			0	0	0	0	0	0	0	0	0	0	0	0	0	0	0	0	0	1121.48	0	16939.6	22204.5	0	0	0	0	0	0	0	0	0	0	0	0	0	0	29.9932	129.902	2469.62	0
18453_7132_x11495_y3152	9162.3	1054.62	3178.55	VISp	VISp	2/3	Cux2-CreERT2;Ai166_374712-18453	18453			0	0	0	0	0	0	0	0	0	0	0	0	0	0	0	0	0	0	0	0	27400.9	0	0	0	0	0	0	0	0	0	0	0	0	0	0	0	0	0	0
18453_7132_x31679_y7308	9665.42	2407.98	1778.32	VISpor	VISli	2/3	Cux2-CreERT2;Ai166_374712-18453	18453			0	0	0	0	0	0	0	0	0	0	0	0	0	0	0	0	0	0	945.836	618.755	2727.18	704.294	3568.98	1075.53	16073.8	0	0	0	0	0	0	0	0	0	0	4446.95	3037.36	1109.48	0
18453_7146_x8788_y4552	9004.97	1687.8	2118.4	VISl	VISp	2/3	Cux2-CreERT2;Ai166_374712-18453	18453			0	0	0	0	778.743	0	0	0	0	0	0	0	0	0	0	0	0	2707.77	0	12609.3	22759.4	0	0	686.422	738.052	0	0	0	0	0	0	0	0	0	0	0	0	0	0
18453_7188_x11060_y3637	9218.92	1303.18	3047.3	VISp	VISp	4	Cux2-CreERT2;Ai166_374712-18453	18453			0	0	0	0	0	0	0	0	0	0	0	0	0	0	0	0	0	0	0	0	48645	59.952	0	0	0	0	0	0	0	0	0	0	0	0	0	0	0	0	0
18453_7223_x30215_y5120	9784.95	1570.47	2441.2	VISp	VISp	2/3	Cux2-CreERT2;Ai166_374712-18453	18453			0	0	0	0	0	0	0	0	0	0	0	0	0	0	0	0	0	0	0	823.896	30036.6	1427.33	0	0	1965.38	0	0	0	0	0	0	0	0	0	0	0	0	1000.53	0
18453_7245_x12979_y2864	9425.85	922.2	3642.75	VISp	VISp	2/3	Cux2-CreERT2;Ai166_374712-18453	18453			0	0	0	0	0	0	0	0	0	0	0	0	0	0	0	0	0	0	0	14147.9	20431.9	0	0	2793.62	149.094	0	0	0	0	0	0	0	0	0	0	276.434	19.8474	869.381	0
18453_7304_x11719_y3749	9431.28	1377.72	3286.5	VISp	VISp	4	Cux2-CreERT2;Ai166_374712-18453	18453			0	0	0	0	0	0	0	0	0	0	0	0	0	0	0	0	0	0	0	0	20446	0	0	0	0	0	0	0	0	0	0	0	0	0	0	0	0	0	0
18453_7309_x5442_y9199	9090.7	3491.68	1060	TEa	TEa	2/3	Cux2-CreERT2;Ai166_374712-18453	18453			0	0	0	0	0	0	0	0	0	0	0	0	0	0	0	0	185.565	0	0	0	0	0	0	0	913.177	0	0	0	0	0	0	0	0	0	0	0	179.793	2058.2	0
18453_7455_x32866_y9412	10059.6	3105.02	1322.62	ENTm	VISpor	2/3	Cux2-CreERT2;Ai166_374712-18453	18453			0	0	0	0	0	0	0	0	0	0	0	0	0	0	0	0	0	0	0	0	1796.72	374.237	0	0	4177.17	0	0	0	0	0	0	0	0	0	0	39.9364	567.595	99.7705	0
18453_7692_x10145_y15241	9529.17	5410.58	2819.03	unknown	ENTm	2/3	Cux2-CreERT2;Ai166_374712-18453	18453			0	0	0	0	0	0	0	0	0	0	0	0	0	0	0	0	0	0	0	0	0	0	0	0	0	0	0	0	0	0	0	0	0	0	0	0	0	0	0
18453_7813_x5799_y12199	9606.53	4505.73	1234	ENTl	ENTl	2/3	Cux2-CreERT2;Ai166_374712-18453	18453			0	0	0	0	0	0	0	0	0	0	0	0	0	0	0	0	0	0	0	0	0	0	0	0	0	0	0	0	0	0	0	0	0	0	0	0	0	29.8774	0
18454_00002	6292.88	2947.23	2696.92	CP	CP	unknown	Tnnt1-IRES2-CreERT2;Ai82;Ai140_373367-18454	18454	CP_SNr		0	0	0	0	0	0	0	0	0	0	0	0	0	0	0	0	0	0	0	0	0	0	0	0	0	0	0	0	0	0	0	0	0	0	0	0	0	0	0
18454_00003	4817.73	3690.55	2651.25	fiber tracts	CP	unknown	Tnnt1-IRES2-CreERT2;Ai82;Ai140_373367-18454	18454	CP_SNr		0	0	0	0	0	0	631.616	0	0	0	0	0	0	0	0	0	0	0	0	0	0	0	0	0	0	0	0	0	0	0	0	0	0	0	0	0	0	0	0
18454_00004	4850.42	3702.88	2628.67	fiber tracts	CP	unknown	Tnnt1-IRES2-CreERT2;Ai82;Ai140_373367-18454	18454	CP_GPe		0	0	0	0	0	0	1049.88	0	0	0	0	0	0	0	0	0	0	0	0	0	0	0	0	0	0	0	0	0	0	0	0	0	0	0	0	0	0	0	0
18454_00009	4808.88	2563	4105.33	MOp	CP	unknown	Tnnt1-IRES2-CreERT2;Ai82;Ai140_373367-18454	18454	CP_SNr		0	586.214	0	0	0	0	0	0	0	0	0	0	0	0	0	0	0	0	0	0	0	0	0	0	0	0	0	0	0	0	0	0	0	0	0	0	0	0	0
18454_00010	4815.65	2738.5	4241.12	fiber tracts	CP	unknown	Tnnt1-IRES2-CreERT2;Ai82;Ai140_373367-18454	18454	CP_GPe		0	252.421	0	0	0	0	0	0	0	0	0	0	0	0	0	0	0	0	0	0	0	0	0	0	0	0	0	0	0	0	0	0	0	0	0	0	0	0	0
18454_00011	4408.4	3134.45	3443.9	fiber tracts	CP	unknown	Tnnt1-IRES2-CreERT2;Ai82;Ai140_373367-18454	18454	CP_GPe		0	4462.18	0	0	0	0	159.491	351.986	0	0	0	0	0	0	0	0	0	0	0	0	0	0	0	0	0	0	0	0	0	0	0	0	0	0	0	0	0	0	0
18454_00014	4462.45	3537.48	2928.5	SSp-m	CP	6b	Tnnt1-IRES2-CreERT2;Ai82;Ai140_373367-18454	18454	CP_SNr		0	0	0	0	0	0	1641.43	0	0	0	0	0	0	0	0	0	0	0	0	0	0	0	0	0	0	0	0	0	0	0	0	0	0	0	0	0	0	0	0
18454_00015	4886.12	3634.05	2889.3	CP	CP	unknown	Tnnt1-IRES2-CreERT2;Ai82;Ai140_373367-18454	18454	CP_GPe		0	423.664	0	0	0	0	1920.09	0	0	0	10.0009	0	0	0	0	0	0	0	0	0	0	0	0	0	0	0	0	0	0	0	0	0	0	0	0	0	0	0	0
18454_00016	3926.1	3782.88	3738.38	CP	CP	unknown	Tnnt1-IRES2-CreERT2;Ai82;Ai140_373367-18454	18454	CP_GPe		0	2469.91	343.488	0	0	0	0	0	0	0	0	0	0	0	0	0	0	0	0	0	0	0	0	0	0	0	0	0	0	569.887	0	0	988.335	0	0	0	0	0	0
18454_00017	3708.1	3780.23	4017.42	fiber tracts	CP	unknown	Tnnt1-IRES2-CreERT2;Ai82;Ai140_373367-18454	18454	CP_GPe		0	29.4084	417.488	0	0	0	0	0	0	0	0	0	0	0	0	0	0	0	0	0	0	0	0	0	0	0	0	0	0	4285.01	0	0	3468.72	0	451.484	0	0	0	0
18454_00018	4336.75	3210.45	3840.92	CP	CP	unknown	Tnnt1-IRES2-CreERT2;Ai82;Ai140_373367-18454	18454	CP_SNr		0	0	0	0	0	0	0	0	0	0	0	0	0	0	0	0	0	0	0	0	0	0	0	0	0	0	0	0	0	0	0	0	0	0	0	0	0	0	0
18454_00020	4488.25	3307.52	3602.23	CP	CP	unknown	Tnnt1-IRES2-CreERT2;Ai82;Ai140_373367-18454	18454	CP_GPe		0	805.671	0	0	0	0	0	0	0	0	0	0	0	0	0	0	0	0	0	0	0	0	0	0	0	0	0	0	0	0	0	0	0	0	0	0	0	0	0
18454_00021	5028.85	3255.1	3636.17	CP	CP	unknown	Tnnt1-IRES2-CreERT2;Ai82;Ai140_373367-18454	18454	CP_SNr		0	0	0	0	0	0	0	0	0	0	0	0	0	0	0	0	0	0	0	0	0	0	0	0	0	0	0	0	0	0	0	0	0	0	0	0	0	0	0
18454_00022	4374.02	3726	3886.45	CP	CP	unknown	Tnnt1-IRES2-CreERT2;Ai82;Ai140_373367-18454	18454	CP_GPe		0	0	0	0	0	0	0	0	0	0	0	0	0	0	0	0	0	0	0	0	0	0	0	0	0	0	0	0	0	0	0	0	0	0	0	0	0	0	0
18454_00024	5863.2	2547.12	3744.52	fiber tracts	CP	unknown	Tnnt1-IRES2-CreERT2;Ai82;Ai140_373367-18454	18454	CP_SNr		0	0	0	0	0	0	0	222.816	0	0	0	0	0	0	0	0	0	0	0	0	0	0	0	0	0	0	0	0	0	0	0	0	0	0	0	0	0	0	0
18454_00027	5440.27	3087.05	3707.02	CP	CP	unknown	Tnnt1-IRES2-CreERT2;Ai82;Ai140_373367-18454	18454	CP_GPe		0	0	0	0	0	0	0	0	0	0	0	0	0	0	0	0	0	0	0	0	0	0	0	0	0	0	0	0	0	0	0	0	0	0	0	0	0	0	0
18454_00028	3670.07	3696.02	4535	fiber tracts	CP	unknown	Tnnt1-IRES2-CreERT2;Ai82;Ai140_373367-18454	18454	CP_SNr		0	0	0	0	0	0	0	0	0	0	0	0	0	0	0	0	0	0	0	0	0	0	0	0	0	0	0	0	0	138.201	0	0	0	0	0	0	0	0	0
18454_00029	3966.23	3880.98	3144.38	MOp	CP	6a	Tnnt1-IRES2-CreERT2;Ai82;Ai140_373367-18454	18454	CP_GPe		0	6202.95	0	0	0	0	69.4792	0	0	0	0	341.648	0	0	0	0	0	0	0	0	0	0	0	0	0	0	0	0	0	0	0	0	1167.65	0	58.0612	0	0	0	0
18454_00039	4525.92	4113.17	3433.92	CP	CP	unknown	Tnnt1-IRES2-CreERT2;Ai82;Ai140_373367-18454	18454	CP_GPe		0	0	0	0	0	0	0	0	0	0	0	0	0	0	0	0	0	0	0	0	0	0	0	0	0	0	0	0	0	0	0	0	342.723	0	0	0	0	0	0
18454_00046	6933.55	3890.88	3654.35	VPM	VPM	unknown	Tnnt1-IRES2-CreERT2;Ai82;Ai140_373367-18454	18454	TH_core		0	0	0	13918.1	0	0	169.581	634.351	0	2112.68	0	0	0	0	0	0	0	0	0	0	0	0	0	0	0	0	0	0	0	0	0	0	0	0	0	0	0	0	0
18454_00048	6882.08	4191.55	4156.8	VPM	VPM	unknown	Tnnt1-IRES2-CreERT2;Ai82;Ai140_373367-18454	18454	TH_core		0	0	0	0	0	0	24271.4	0	0	0	0	0	0	0	0	0	0	0	0	0	0	0	0	0	0	0	0	0	0	0	0	0	0	0	0	0	0	0	0
18454_00049	4036.35	4165.3	4656.05	CP	CP	unknown	Tnnt1-IRES2-CreERT2;Ai82;Ai140_373367-18454	18454	CP_GPe		0	0	0	0	0	0	0	0	0	0	0	0	0	0	0	0	0	0	0	0	0	0	0	0	0	0	0	0	0	59.5669	0	0	0	0	0	0	0	0	0
18454_00050	6170.38	4283.48	5547.48	PT	MD	unknown	Tnnt1-IRES2-CreERT2;Ai82;Ai140_373367-18454	18454	TH_matrix	anterior MD	1261.08	0	0	0	0	0	0	0	0	0	0	0	0	0	0	0	0	0	0	0	0	0	0	0	0	0	0	6300.53	0	6154.17	3828.85	1071.53	1563.89	0	1570.28	0	0	0	0
18454_00051	6698.67	4447.52	4395.83	VAL	VAL	unknown	Tnnt1-IRES2-CreERT2;Ai82;Ai140_373367-18454	18454	TH_core		0	50267.7	5270.58	0	0	0	4466.2	0	0	0	16659	0	0	0	0	0	0	0	0	0	0	0	0	0	0	0	0	0	0	0	0	0	0	0	0	0	0	0	0
18454_00052	6901.5	4463.55	4317.23	VPM	VPM	unknown	Tnnt1-IRES2-CreERT2;Ai82;Ai140_373367-18454	18454	TH_core		0	11847	0	0	0	0	28412.5	0	0	0	0	0	0	0	0	0	0	0	0	0	0	0	0	0	0	0	0	0	0	0	0	0	0	0	0	0	0	0	0
18454_00053	6194.02	4264.12	5434.27	PT	MD	unknown	Tnnt1-IRES2-CreERT2;Ai82;Ai140_373367-18454	18454	TH_matrix	anterior MD	388.395	0	0	0	0	0	0	0	0	0	0	0	0	0	0	0	0	0	0	0	0	0	0	0	0	0	0	4902.87	139.636	3166.76	16337.6	3020.34	474.179	49.8932	5123.36	0	0	0	0
18454_00054	6659.48	4895.95	5123.33	SMT	SMT	unknown	Tnnt1-IRES2-CreERT2;Ai82;Ai140_373367-18454	18454	TH_core	small arbor	0	0	0	0	0	0	0	0	0	0	0	0	0	0	0	0	0	0	0	0	0	0	0	0	0	0	0	0	0	40206.2	0	745.571	59.5699	0	9.99323	0	0	0	0
18454_00055	6368.85	4949.33	5334.95	unknown	RE	unknown	Tnnt1-IRES2-CreERT2;Ai82;Ai140_373367-18454	18454	TH_matrix		0	0	0	0	0	0	0	0	0	0	0	0	0	0	0	0	0	0	0	0	0	0	0	0	0	0	1199.66	908.551	0	15408	3482.68	28658.7	0	0	589.183	0	0	0	0
18454_00056	6352.55	4827.08	5441.12	RH	RE	unknown	Tnnt1-IRES2-CreERT2;Ai82;Ai140_373367-18454	18454	TH_matrix		0	0	0	0	0	0	0	0	0	0	0	0	0	229.625	0	0	0	2619.7	0	1720.42	1407.69	0	0	277.364	0	0	3226.6	1853.08	279.164	5072.79	9714.62	24799.7	109.853	0	943.437	0	0	3138.45	0
18454_00057	6576.83	4816.23	5500.9	SMT	RE	unknown	Tnnt1-IRES2-CreERT2;Ai82;Ai140_373367-18454	18454	TH_matrix		218.806	812.837	5045.55	0	0	59.373	0	169.324	0	0	0	0	0	0	0	0	0	0	0	0	0	0	0	0	0	4279.73	0	1264.99	0	37263.5	59.9801	5166.51	528.068	0	4037.45	0	0	0	0
18454_00058	6557.6	4875.7	5538.9	SMT	RE	unknown	Tnnt1-IRES2-CreERT2;Ai82;Ai140_373367-18454	18454	TH_matrix		277.727	0	918.508	0	0	0	0	0	0	0	0	329.554	0	0	0	0	0	0	0	0	0	0	0	0	0	818.784	0	1998.15	0	21856.6	1022.63	9457.81	6665.89	1266.34	5460.47	0	0	0	0
18454_00059	7798.9	3095.98	3454.52	LGd	LGd	unknown	Tnnt1-IRES2-CreERT2;Ai82;Ai140_373367-18454	18454	TH_core		0	0	0	0	9.99183	0	0	0	0	0	618.871	0	0	369.089	0	0	0	0	0	0	24887.9	0	0	0	0	0	0	0	0	0	0	0	0	0	0	0	0	0	0
18454_00060	7218.5	3305.35	3430.92	fiber tracts	VPM	unknown	Tnnt1-IRES2-CreERT2;Ai82;Ai140_373367-18454	18454	TH_core		0	0	0	0	21429.5	0	0	0	0	0	1010.84	0	0	0	0	0	0	0	0	0	0	0	0	0	0	0	0	0	0	0	0	0	0	0	0	0	0	0	0
18454_00061	7297.75	3313.62	3460.6	LGd	VPM	unknown	Tnnt1-IRES2-CreERT2;Ai82;Ai140_373367-18454	18454	TH_core		0	0	0	0	24363.2	0	0	0	0	0	68.2346	0	0	0	0	0	0	0	0	0	0	0	0	0	0	0	0	0	0	0	0	0	0	0	0	0	0	0	0
18454_00062	7893.75	3777.7	3538.95	MG	VPM	unknown	Tnnt1-IRES2-CreERT2;Ai82;Ai140_373367-18454	18454	TH_core		0	0	0	0	1067.42	0	0	0	0	0	12348.1	0	0	8549.09	649.074	0	1524.99	0	0	0	0	0	0	0	0	0	0	0	0	0	0	0	0	0	0	0	0	0	0
18454_00063	8206.65	3602.52	3629.55	MG	MG	unknown	Tnnt1-IRES2-CreERT2;Ai82;Ai140_373367-18454	18454	TH_core	double targets	0	0	0	0	0	0	0	0	0	0	747.556	0	709.89	11828.7	18774.4	0	9182.83	0	0	0	0	0	0	0	0	0	0	0	0	0	0	0	0	0	0	0	0	0	0
18454_00064	7170.83	3490.12	3595.15	VPM	VPM	unknown	Tnnt1-IRES2-CreERT2;Ai82;Ai140_373367-18454	18454	TH_core		0	0	0	832.995	19150.2	0	0	0	0	0	0	0	0	0	0	0	0	0	0	0	0	0	0	0	0	0	0	0	0	0	0	0	0	0	0	0	0	0	0
18454_00065	7028.55	3594.2	3997.23	PO	PO	unknown	Tnnt1-IRES2-CreERT2;Ai82;Ai140_373367-18454	18454	TH_matrix		0	9938.79	14577.9	0	1823.01	1786.33	39.8709	26944.5	0	1637.31	0	0	0	0	0	0	0	0	0	0	0	0	0	0	0	0	0	0	0	0	0	0	0	0	0	0	0	0	0
18454_00066	7068.42	3998.55	3868.02	VPM	VPM	unknown	Tnnt1-IRES2-CreERT2;Ai82;Ai140_373367-18454	18454	TH_core		0	0	0	11283	0	0	8718.15	0	0	0	0	0	0	0	0	0	0	0	0	0	0	0	0	0	0	0	0	0	0	0	0	0	0	0	0	0	0	0	0
18454_00067	7676.33	3654.4	3611.65	fiber tracts	VPM	unknown	Tnnt1-IRES2-CreERT2;Ai82;Ai140_373367-18454	18454	TH_core		0	0	0	0	119.957	0	0	0	767.486	0	707.191	0	0	1135.85	0	0	378.198	0	0	0	0	0	0	0	0	0	0	0	0	0	0	0	0	0	0	0	0	0	12172.5
18454_00068	7041.27	4414.95	3399.33	VPL	VPL	unknown	Tnnt1-IRES2-CreERT2;Ai82;Ai140_373367-18454	18454	TH_core		0	1684.3	0	439.644	1477.43	15813.4	0	2662.24	0	259.511	475.486	0	0	0	0	0	0	0	0	0	0	0	0	0	0	0	0	0	0	0	0	0	0	0	0	0	0	0	0
18454_00069	8344.35	4014.38	3541.8	MG	MG	unknown	Tnnt1-IRES2-CreERT2;Ai82;Ai140_373367-18454	18454	TH_core		0	0	0	0	0	0	0	0	0	0	776.631	0	0	898.445	21561.1	0	337.888	0	0	0	0	0	0	0	0	0	0	0	0	0	0	0	0	0	0	0	0	0	0
18454_00070	7358.5	4260.75	3946.6	VPM	VPM	unknown	Tnnt1-IRES2-CreERT2;Ai82;Ai140_373367-18454	18454	TH_core		0	0	0	1699.57	0	0	5533.41	0	0	0	24924.1	0	0	0	0	0	0	0	0	0	0	0	0	0	0	0	0	0	0	0	0	0	0	0	0	0	0	0	0
18454_00071	7025.7	4356.7	4079.42	VPM	VPM	unknown	Tnnt1-IRES2-CreERT2;Ai82;Ai140_373367-18454	18454	TH_core		0	0	0	0	0	0	30510.3	1196.62	0	0	0	0	0	0	0	0	0	0	0	0	0	0	0	0	0	0	0	0	0	0	0	0	0	0	0	0	0	0	0
18454_00072	7210.1	4264.92	4171.8	VPM	VPM	unknown	Tnnt1-IRES2-CreERT2;Ai82;Ai140_373367-18454	18454	TH_core		0	0	0	0	0	0	41849.9	0	0	0	8873.57	0	0	0	0	0	0	0	0	0	0	0	0	0	0	0	0	0	0	0	0	0	0	0	0	0	0	0	0
18454_00073	7645.73	4349.1	4040.77	VPM	VPLpc	unknown	Tnnt1-IRES2-CreERT2;Ai82;Ai140_373367-18454	18454	TH_core		0	0	0	0	0	0	0	0	0	0	31965.7	517.725	2420.95	0	0	0	0	0	0	0	0	0	0	0	0	0	0	0	0	0	0	0	0	519.791	0	0	0	0	0
18454_00074	6948.65	3812.48	5475.48	MD	MD	unknown	Tnnt1-IRES2-CreERT2;Ai82;Ai140_373367-18454	18454	TH_core	posterior MD	0	0	1054.32	0	0	0	0	0	0	0	0	49.8797	0	0	0	0	0	0	0	0	0	0	0	0	0	0	0	0	0	5928.47	0	0	40378.7	0	1876.44	0	0	0	0
18454_00075	7091.6	4585.4	4633.33	PO	VAL	unknown	Tnnt1-IRES2-CreERT2;Ai82;Ai140_373367-18454	18454	TH_core		0	33469.3	0	0	0	0	20432.2	0	0	0	0	150.433	0	0	0	0	0	0	0	0	0	0	0	0	0	0	0	0	0	0	0	0	0	0	0	0	0	0	0
18454_00093	5642.23	3154.5	3198.02	CP	CP	unknown	Tnnt1-IRES2-CreERT2;Ai82;Ai140_373367-18454	18454	CP_SNr		0	0	0	0	0	0	0	0	0	0	0	0	0	0	0	0	0	0	0	0	0	0	0	0	0	0	0	0	0	0	0	0	0	0	0	0	0	0	0
18454_00095	6205.4	4286.98	5610.15	CM	CM	unknown	Tnnt1-IRES2-CreERT2;Ai82;Ai140_373367-18454	18454	TH_matrix		0	0	0	0	0	0	0	0	0	0	0	0	0	0	0	0	0	0	0	0	0	0	0	0	0	0	0	937.646	0	0	397.257	0	0	0	0	0	0	0	0
18454_00096	6111.8	4268.85	5431.25	PT	MD	unknown	Tnnt1-IRES2-CreERT2;Ai82;Ai140_373367-18454	18454	TH_matrix	anterior MD	0	0	0	0	0	0	0	0	0	0	0	0	0	0	0	0	0	0	0	0	0	0	0	0	0	0	0	551.132	0	2053.28	14318.7	6749.92	456.082	0	4247.71	0	0	0	0
18454_00097	6278.45	4203.15	5449.58	CM	CM	unknown	Tnnt1-IRES2-CreERT2;Ai82;Ai140_373367-18454	18454	TH_matrix		4263.39	0	600.401	0	0	0	0	0	0	0	0	0	0	0	0	0	0	0	0	0	0	0	0	0	0	0	0	2407.07	0	6926.82	875.207	2134.43	14266.6	0	10100.2	0	0	0	0
18454_00098	6168.9	4185.8	5284.27	IAD	IAD	unknown	Tnnt1-IRES2-CreERT2;Ai82;Ai140_373367-18454	18454	TH_matrix		3638.83	0	0	0	0	0	0	0	0	0	0	0	0	0	0	0	0	0	0	0	0	0	0	0	0	0	0	1496.16	0	675.034	3857.69	23959.2	0	0	0	0	0	0	0
18454_00099	6374.45	4724.17	5276.73	unknown	AM	unknown	Tnnt1-IRES2-CreERT2;Ai82;Ai140_373367-18454	18454	TH_core		239.548	0	2236.02	0	0	0	0	0	0	0	0	0	0	0	0	0	0	0	0	0	0	0	0	0	0	157.455	0	0	0	5289.97	0	35380.4	10.004	0	0	0	0	0	0
18454_00100	6499.98	4726.23	5245.55	SMT	SMT	unknown	Tnnt1-IRES2-CreERT2;Ai82;Ai140_373367-18454	18454	TH_core	small arbor	275.023	0	58.5969	0	0	0	0	0	0	0	0	0	0	0	0	0	0	0	0	0	0	0	0	0	0	0	0	0	0	28061.6	0	5485.14	0	0	0	0	0	0	0
18454_00101	6470.12	4751.2	5223.85	SMT	SMT	unknown	Tnnt1-IRES2-CreERT2;Ai82;Ai140_373367-18454	18454	TH_core	small arbor	0	0	0	0	0	0	0	0	0	0	0	0	0	0	0	0	0	0	0	0	0	0	0	0	0	0	0	0	0	26276.8	0	5355.62	0	0	0	0	0	0	0
18454_00105	6730.52	4433.5	3980.05	VPM	VPM	unknown	Tnnt1-IRES2-CreERT2;Ai82;Ai140_373367-18454	18454	TH_core		0	0	0	258.755	0	0	19561.1	0	0	0	0	0	0	0	0	0	0	0	0	0	0	0	0	0	0	0	0	0	0	0	0	0	0	0	0	0	0	0	0
18454_00106	6652.1	4724.35	4008.45	VPL	VPL	unknown	Tnnt1-IRES2-CreERT2;Ai82;Ai140_373367-18454	18454	TH_core		0	745.464	0	0	0	0	32997	109.476	0	0	0	0	0	0	0	0	0	0	0	0	0	0	0	0	0	0	0	0	0	0	0	0	0	0	0	0	0	0	0
18454_00107	6661.95	4837.15	4087.75	VPL	VPM	unknown	Tnnt1-IRES2-CreERT2;Ai82;Ai140_373367-18454	18454	TH_core		0	4560.21	0	0	0	0	22569.9	29.9914	0	0	0	0	0	0	0	0	0	0	0	0	0	0	0	0	0	0	0	0	0	0	0	0	0	0	0	0	0	0	0
18454_00109	6749.62	4734.88	3696.48	VPL	VPL	unknown	Tnnt1-IRES2-CreERT2;Ai82;Ai140_373367-18454	18454	TH_core	small arbor, single	0	0	0	1157.2	0	0	0	26339.1	0	3286.74	0	0	0	0	0	0	0	0	0	0	0	0	0	0	0	0	0	0	0	0	0	0	0	0	0	0	0	0	0
18454_00111	4734.25	4243.33	2690.73	CP	CP	unknown	Tnnt1-IRES2-CreERT2;Ai82;Ai140_373367-18454	18454	CP_SNr		0	0	0	0	0	0	0	0	0	0	0	0	0	0	0	0	0	0	0	0	0	0	0	0	0	0	0	0	0	0	0	0	0	0	0	0	0	0	0
18454_00126	7397.3	3283.15	3618.82	LGd	LP	unknown	Tnnt1-IRES2-CreERT2;Ai82;Ai140_373367-18454	18454	TH_matrix	posterior LP	0	0	0	0	0	0	0	0	297.228	0	139.373	0	0	10971.7	2229.5	13297.1	218.54	9415.21	12723.1	0	0	0	4871.8	0	0	0	0	0	0	0	0	0	0	0	0	0	0	0	8340.63
18454_00127	7161.12	3600.07	3747.45	VPM	VPM	unknown	Tnnt1-IRES2-CreERT2;Ai82;Ai140_373367-18454	18454	TH_core	large arbor, single	0	0	0	0	10539.7	0	0	0	0	0	20227.3	0	0	389.495	0	0	531.251	0	0	0	0	0	0	0	0	0	0	0	0	0	0	0	0	0	0	0	0	0	0
18454_00128	7176.55	3535.6	3550.32	VPM	VPM	unknown	Tnnt1-IRES2-CreERT2;Ai82;Ai140_373367-18454	18454	TH_core		0	0	3583.55	0	208.806	0	0	0	0	0	0	0	0	0	0	0	0	1611.4	249.422	1664.45	18199.1	0	339.61	0	0	1583.55	386.541	0	0	0	0	0	0	0	0	379.301	1037.84	2080.72	0
18454_00129	7464.17	3427.07	3309.73	LGd	LGd	unknown	Tnnt1-IRES2-CreERT2;Ai82;Ai140_373367-18454	18454	TH_core		0	0	0	0	17485.3	0	0	0	0	0	816.809	0	0	1068.48	1269.6	0	0	0	0	0	0	0	0	0	0	0	0	0	0	0	0	0	0	0	0	0	0	0	0
18454_00130	6814.95	3847.85	5308.88	MD	MD	unknown	Tnnt1-IRES2-CreERT2;Ai82;Ai140_373367-18454	18454	TH_core	posterior MD	3938.57	0	0	0	0	0	0	0	0	0	0	0	0	0	0	0	0	0	0	0	0	0	0	0	0	0	0	89.7778	0	3406.11	456.058	1776.88	8768.51	0	38515.7	0	0	0	0
18454_00131	7090.5	4765.12	4612.38	VPM	VPM	unknown	Tnnt1-IRES2-CreERT2;Ai82;Ai140_373367-18454	18454	TH_core		0	1580.5	0	0	0	0	32205.7	0	0	0	777.263	13268.2	0	0	0	0	0	0	0	0	0	0	0	0	0	0	0	0	0	0	0	0	0	0	0	0	0	0	0
18454_00132	7378.05	4729.9	4527.3	VPLpc	VPMpc	unknown	Tnnt1-IRES2-CreERT2;Ai82;Ai140_373367-18454	18454	TH_core		0	0	0	0	0	0	336.504	0	0	0	4777.29	31630.5	1659.62	0	0	0	0	0	0	0	0	0	0	0	0	0	0	0	0	0	0	0	179.551	4967.62	0	0	0	0	0
18454_00133	6997.2	3975.2	3882.73	VPM	VPM	unknown	Tnnt1-IRES2-CreERT2;Ai82;Ai140_373367-18454	18454	TH_core		0	0	0	28293.9	49.8036	0	0	0	0	0	1200.78	0	0	0	0	0	0	0	0	0	0	0	0	0	0	0	0	0	0	0	0	0	0	0	0	0	0	0	0
18454_00134	7070	4191.08	3752.02	VPM	VPM	unknown	Tnnt1-IRES2-CreERT2;Ai82;Ai140_373367-18454	18454	TH_core		0	0	0	20867.8	704.342	0	0	0	0	0	19.962	0	0	0	0	0	0	0	0	0	0	0	0	0	0	0	0	0	0	0	0	0	0	0	0	0	0	0	0
18454_00135	6894.1	4473.6	4149.42	VPM	VPM	unknown	Tnnt1-IRES2-CreERT2;Ai82;Ai140_373367-18454	18454	TH_core		0	2509.7	0	0	0	0	22417.9	0	0	0	5401.78	0	0	0	0	0	0	0	0	0	0	0	0	0	0	0	0	0	0	0	0	0	0	0	0	0	0	0	0
18454_00136	7145.08	4444.75	4318.85	VPM	VPM	unknown	Tnnt1-IRES2-CreERT2;Ai82;Ai140_373367-18454	18454	TH_core		0	10931.2	0	0	0	0	13819.6	0	0	0	29288.8	0	0	0	0	0	0	0	0	0	0	0	0	0	0	0	0	0	0	0	0	0	0	0	0	0	0	0	0
18454_00137	6889.7	4265.45	3949.62	VPM	VPM	unknown	Tnnt1-IRES2-CreERT2;Ai82;Ai140_373367-18454	18454	TH_core		0	0	0	26158.7	0	0	19.9977	0	0	0	0	0	0	0	0	0	0	0	0	0	0	0	0	0	0	0	0	0	0	0	0	0	0	0	0	0	0	0	0
18454_00138	7191.58	4270.3	3967.55	VPM	VPM	unknown	Tnnt1-IRES2-CreERT2;Ai82;Ai140_373367-18454	18454	TH_core		0	0	0	1258.16	0	0	0	0	0	0	28147	0	0	0	0	0	0	0	0	0	0	0	0	0	0	0	0	0	0	0	0	0	0	0	0	0	0	0	0
18454_00139	7334.3	4248.17	3782.73	VPM	VPM	unknown	Tnnt1-IRES2-CreERT2;Ai82;Ai140_373367-18454	18454	TH_core		0	0	0	368.731	168.883	0	0	0	0	0	31518.6	0	110.414	0	0	0	0	0	0	0	0	0	0	0	0	0	0	0	0	0	0	0	0	0	0	0	0	0	0
18454_00140	7130.88	4488.15	3969.68	VPM	VPL	unknown	Tnnt1-IRES2-CreERT2;Ai82;Ai140_373367-18454	18454	TH_core		0	0	0	935.701	0	0	15961.3	0	0	0	9608.61	0	0	0	0	0	0	0	0	0	0	0	0	0	0	0	0	0	0	0	0	0	0	0	0	0	0	0	0
18454_00141	7433.4	4545.62	3978.57	VPL	VPL	unknown	Tnnt1-IRES2-CreERT2;Ai82;Ai140_373367-18454	18454	TH_core		0	0	0	0	0	0	0	0	0	0	27129.4	0	8927.04	0	0	0	0	0	0	0	0	0	0	0	0	0	0	0	0	0	0	0	0	0	0	0	0	0	0
18454_00142	7661.77	4341.25	3761	VPL	VPL	unknown	Tnnt1-IRES2-CreERT2;Ai82;Ai140_373367-18454	18454	TH_core		0	0	0	0	0	0	0	0	0	0	33175.4	0	3300.26	6840.11	0	0	1653.31	0	0	0	0	0	0	0	0	0	0	0	0	0	0	0	0	0	0	0	0	0	0
18454_00143	7790.67	4428	3927.07	fiber tracts	VPL	unknown	Tnnt1-IRES2-CreERT2;Ai82;Ai140_373367-18454	18454	TH_core		0	0	0	0	0	0	0	0	0	0	6948.7	373.918	14888.3	0	0	0	0	0	0	0	0	0	0	0	0	0	0	0	0	0	0	0	0	3039.22	0	0	0	0	0
18454_00144	8059.12	4423.23	3769.5	unknown	VPL	unknown	Tnnt1-IRES2-CreERT2;Ai82;Ai140_373367-18454	18454	TH_core		0	0	0	0	0	0	0	0	0	0	2428.03	349.23	27444.8	0	0	0	0	0	0	0	0	0	0	0	0	0	0	0	0	0	0	0	0	0	0	0	0	0	0
18454_00145	7060.1	4432.3	3594.4	VPL	VPL	unknown	Tnnt1-IRES2-CreERT2;Ai82;Ai140_373367-18454	18454	TH_core		0	0	0	19418.1	0	0	0	0	0	0	1745.05	0	0	0	0	0	0	0	0	0	0	0	0	0	0	0	0	0	0	0	0	0	0	0	0	0	0	0	0
18454_00146	7252.02	4532.45	3606.45	VPL	VPM	unknown	Tnnt1-IRES2-CreERT2;Ai82;Ai140_373367-18454	18454	TH_core		0	0	0	843.434	13247	0	0	0	0	0	11081.7	0	0	368.754	0	0	614.923	0	0	0	0	0	0	0	0	0	0	0	0	0	0	0	0	0	0	0	0	0	0
18454_00147	7463.17	4520.9	3561.9	ZI	VPL	unknown	Tnnt1-IRES2-CreERT2;Ai82;Ai140_373367-18454	18454	TH_core		0	0	0	0	24896.2	0	0	0	0	523.26	5408.02	0	0	6430.93	89.8827	0	627.025	0	0	0	0	0	0	0	0	0	0	0	0	0	0	0	0	0	0	0	0	0	0
18454_00148	6890.88	4596.02	3427.65	RT	VPL	unknown	Tnnt1-IRES2-CreERT2;Ai82;Ai140_373367-18454	18454	TH_core		0	0	0	0	3281.34	159.247	0	24692.1	0	446.86	557.204	0	0	0	0	0	0	0	0	0	0	0	0	0	0	0	0	0	0	0	0	0	0	0	0	0	0	0	0
18454_00149	7992.75	4039.57	3609.35	MG	MG	unknown	Tnnt1-IRES2-CreERT2;Ai82;Ai140_373367-18454	18454	TH_core	single target	0	0	0	0	0	0	0	0	0	0	0	0	0	0	15256.7	0	399.136	0	0	0	0	0	0	0	0	0	0	0	0	0	0	0	0	0	0	0	0	0	0
18454_00150	8161.83	3970.45	3544.27	MG	MG	unknown	Tnnt1-IRES2-CreERT2;Ai82;Ai140_373367-18454	18454	TH_core		0	0	0	0	0	0	0	0	0	0	1321.93	0	0	348.305	16088	0	8440.94	0	0	0	0	0	0	0	0	0	0	0	0	0	0	0	0	0	0	0	0	0	0
18454_00151	7958	4290.2	3707.02	MG	MG	unknown	Tnnt1-IRES2-CreERT2;Ai82;Ai140_373367-18454	18454	TH_core		0	0	0	0	0	0	0	0	0	0	2690.11	0	28318.3	0	0	0	0	0	0	0	0	0	0	0	0	0	0	0	0	0	0	0	0	0	0	0	0	0	0
18454_00152	8079.67	4411.9	3547.55	ZI	VPM	unknown	Tnnt1-IRES2-CreERT2;Ai82;Ai140_373367-18454	18454	TH_core		0	0	0	0	13221.1	0	0	0	0	0	449.369	0	0	319.43	666.446	0	458.903	0	0	0	0	0	0	0	0	0	0	0	0	0	0	0	0	288.525	0	0	0	0	0
18454_00153	7093.35	4551.3	4233.1	VPM	VPM	unknown	Tnnt1-IRES2-CreERT2;Ai82;Ai140_373367-18454	18454	TH_core		0	0	0	0	0	0	794.395	0	0	0	22799.1	0	0	0	0	0	0	0	0	0	0	0	0	0	0	0	0	0	0	0	0	0	0	0	0	0	0	0	0
18454_00154	6874.55	4745.95	4254.3	VPM	VPM	unknown	Tnnt1-IRES2-CreERT2;Ai82;Ai140_373367-18454	18454	TH_core		0	0	0	0	0	0	18536.9	0	0	0	9996.75	0	0	0	0	0	0	0	0	0	0	0	0	0	0	0	0	0	0	0	0	0	0	0	0	0	0	0	0
18454_00155	6998.8	4716	4243.1	VPM	VPM	unknown	Tnnt1-IRES2-CreERT2;Ai82;Ai140_373367-18454	18454	TH_core		0	0	0	0	0	0	2374.31	0	0	0	20763.1	1126.61	219.352	0	0	0	0	0	0	0	0	0	0	0	0	0	0	0	0	0	0	0	0	158.669	0	0	0	0	0
18454_00156	7373.08	4701.33	4132.25	unknown	VPL	unknown	Tnnt1-IRES2-CreERT2;Ai82;Ai140_373367-18454	18454	TH_core		0	0	0	0	0	0	0	0	0	0	15082.7	8434.79	17794.1	0	0	0	0	0	0	0	0	0	0	0	0	0	0	0	0	0	0	0	0	1032.53	0	0	0	0	0
18454_00157	7100.95	4728.67	3842.75	VPL	VPL	unknown	Tnnt1-IRES2-CreERT2;Ai82;Ai140_373367-18454	18454	TH_core		0	0	0	587.709	0	0	25486	0	0	0	13564.4	0	0	0	0	0	0	0	0	0	0	0	0	0	0	0	0	0	0	0	0	0	0	0	0	0	0	0	0
18454_00158	6845.08	4800.12	3971.73	VPL	VPL	unknown	Tnnt1-IRES2-CreERT2;Ai82;Ai140_373367-18454	18454	TH_core		0	0	0	706.269	0	0	30521.4	0	0	0	0	0	0	0	0	0	0	0	0	0	0	0	0	0	0	0	0	0	0	0	0	0	0	0	0	0	0	0	0
18454_00159	7163.05	4951.83	3813.02	ZI	VPL	unknown	Tnnt1-IRES2-CreERT2;Ai82;Ai140_373367-18454	18454	TH_core		0	0	0	0	0	0	16417.4	0	0	0	32198.4	0	0	0	0	0	0	0	0	0	0	0	0	0	0	0	0	0	0	0	0	0	0	0	0	0	0	0	0
18454_00160	7104.55	5050.38	4341.12	VM	VPM	unknown	Tnnt1-IRES2-CreERT2;Ai82;Ai140_373367-18454	18454	TH_core		0	9.99587	0	0	0	0	34929.8	0	0	0	0	903.904	0	0	0	0	0	0	0	0	0	0	0	0	0	0	0	0	0	0	0	0	0	0	0	0	0	0	0
18454_00161	7153.2	4968.45	4433.25	VM	VPM	unknown	Tnnt1-IRES2-CreERT2;Ai82;Ai140_373367-18454	18454	TH_core		0	0	0	0	0	0	18819.5	0	0	0	4000.23	21536.9	2486.34	0	0	0	0	0	0	0	0	0	0	0	0	0	0	0	0	0	0	0	0	0	0	0	0	0	0
18454_00162	6941.67	4695.05	3735.52	VPL	VPM	unknown	Tnnt1-IRES2-CreERT2;Ai82;Ai140_373367-18454	18454	TH_core		0	0	0	2899.44	0	0	16251.7	0	0	0	0	0	0	0	0	0	0	0	0	0	0	0	0	0	0	0	0	0	0	0	0	0	0	0	0	0	0	0	0
18454_00163	6829.83	4709.4	3567.57	RT	VPL	unknown	Tnnt1-IRES2-CreERT2;Ai82;Ai140_373367-18454	18454	TH_core		0	0	0	1640.79	159.286	0	0	23580.3	0	2135.33	38.8062	0	0	0	0	0	0	0	0	0	0	0	0	0	0	0	0	0	0	0	0	0	0	0	0	0	0	0	0
18454_00164	7104.3	4813.88	3782.7	VPL	VPL	unknown	Tnnt1-IRES2-CreERT2;Ai82;Ai140_373367-18454	18454	TH_core		0	0	0	0	0	0	28784.1	0	0	0	5748.52	0	0	0	0	0	0	0	0	0	0	0	0	0	0	0	0	0	0	0	0	0	0	0	0	0	0	0	0
18454_00165	7168.15	4601.62	3776.02	VPL	VPL	unknown	Tnnt1-IRES2-CreERT2;Ai82;Ai140_373367-18454	18454	TH_core		0	0	0	51516.1	0	0	1450.28	0	0	0	13989.2	0	0	0	0	0	0	0	0	0	0	0	0	0	0	0	0	0	0	0	0	0	0	0	0	0	0	0	0
18454_00166	6825.02	5005.73	3679.1	fiber tracts	VPL	unknown	Tnnt1-IRES2-CreERT2;Ai82;Ai140_373367-18454	18454	TH_core		0	0	0	1050.38	0	0	338.498	23859	0	1829.48	0	0	0	0	0	0	0	0	0	0	0	0	0	0	0	0	0	0	0	0	0	0	0	0	0	0	0	0	0
18454_00167	6920.3	5026.98	3562.38	fiber tracts	VPL	unknown	Tnnt1-IRES2-CreERT2;Ai82;Ai140_373367-18454	18454	TH_core		0	0	0	98.4252	1304.51	0	0	18843.7	0	1370.06	4030.55	0	0	309.656	0	0	1426.21	0	0	0	0	0	0	0	0	0	0	0	0	0	0	0	0	0	0	0	0	0	0
18454_00168	6842.52	5042.62	3594.55	fiber tracts	VPL	unknown	Tnnt1-IRES2-CreERT2;Ai82;Ai140_373367-18454	18454	TH_core		0	0	0	1256.47	1989.28	0	0	36514.6	0	429.007	725.903	0	0	0	0	0	0	0	0	0	0	0	0	0	0	0	0	0	0	0	0	0	0	0	0	0	0	0	0
18454_00169	6756.3	5171.58	3661.12	GPi	VPL	unknown	Tnnt1-IRES2-CreERT2;Ai82;Ai140_373367-18454	18454	TH_core		0	313.252	0	1436.73	3516.22	29608.3	0	16097.5	835.179	3287.51	725.745	0	0	233.912	0	0	0	0	0	0	0	0	0	0	0	0	0	0	0	0	0	0	0	0	0	0	0	0	29.9143
18454_00170	8566.22	4298.67	3240.52	unknown	MG	unknown	Tnnt1-IRES2-CreERT2;Ai82;Ai140_373367-18454	18454	TH_core	single target	0	0	0	0	0	0	0	0	0	0	0	0	0	0	1967.82	0	23437.6	0	0	0	0	0	0	0	0	0	0	0	0	0	0	0	0	0	0	0	0	0	0
18454_00171	8374.53	4513.55	3376.57	LT	MG	unknown	Tnnt1-IRES2-CreERT2;Ai82;Ai140_373367-18454	18454	TH_core	double targets	0	0	0	0	0	0	0	0	0	0	0	0	0	0	20502.5	0	1421.16	0	0	0	0	0	0	0	0	0	0	0	0	0	0	0	0	0	0	0	0	0	0
18454_00174	5140.77	5308.6	2565.53	CP	CP	unknown	Tnnt1-IRES2-CreERT2;Ai82;Ai140_373367-18454	18454	CP_SNr		0	0	0	0	0	0	0	0	0	0	0	0	0	0	0	0	0	0	0	0	0	0	0	0	0	0	0	0	0	0	0	0	0	0	0	0	0	0	0
18454_00176	6591.33	5024.65	5257.33	SMT	SMT	unknown	Tnnt1-IRES2-CreERT2;Ai82;Ai140_373367-18454	18454	TH_core	large arbor	0	0	0	0	0	0	0	0	0	0	0	0	0	0	0	0	0	0	0	0	0	0	0	0	0	0	0	0	0	55419.9	59.8403	4183.5	0	0	79.9735	0	0	0	0
18454_00177	6559.42	5091.62	5321.83	SMT	SMT	unknown	Tnnt1-IRES2-CreERT2;Ai82;Ai140_373367-18454	18454	TH_core	large arbor	0	0	0	0	0	0	0	0	0	0	0	0	0	0	0	0	0	0	0	0	0	0	0	0	0	0	0	0	0	44364.8	29.9965	8710.8	278.912	0	603.198	0	0	0	0
18454_01000	6937.12	3546.27	3132.97	fiber tracts	VPL	unknown	Tnnt1-IRES2-CreERT2;Ai82;Ai140_373367-18454	18454	TH_core		0	0	0	0	0	0	0	0	15342.8	0	0	0	0	0	0	0	0	0	0	0	0	0	0	0	0	0	0	0	0	0	0	0	0	0	0	12863.3	10.0022	0	20172.3
18454_01001	6993.65	3932.2	3446.02	VPM	VPM	unknown	Tnnt1-IRES2-CreERT2;Ai82;Ai140_373367-18454	18454	TH_core		0	0	0	0	368.25	0	0	1611.34	0	15947	0	0	0	0	0	0	0	0	0	0	0	0	0	0	0	0	0	0	0	0	0	0	0	0	0	0	0	0	0
18454_01004	6858.7	3750.2	3502.23	VPM	VPM	unknown	Tnnt1-IRES2-CreERT2;Ai82;Ai140_373367-18454	18454	TH_core		0	1504.45	748.372	38.4942	0	11896.4	0	37083.7	469.399	545.001	0	0	0	0	0	0	0	0	0	0	0	0	0	0	0	0	0	0	0	0	0	0	0	0	0	0	0	0	0
18454_01005	6960.67	3812.85	3476.67	VPM	VPM	unknown	Tnnt1-IRES2-CreERT2;Ai82;Ai140_373367-18454	18454	TH_core		0	0	0	1355.26	547.988	0	0	1155.15	0	24481.3	0	0	0	0	0	0	0	0	0	0	0	0	0	0	0	0	0	0	0	0	0	0	0	0	0	0	0	0	0
18454_01006	6957.12	4359.17	3223.9	RT	VPL	unknown	Tnnt1-IRES2-CreERT2;Ai82;Ai140_373367-18454	18454			0	5332	0	833.776	1655.68	30266.6	0	1070.91	158.724	238.649	437.917	0	0	0	0	0	0	0	0	0	0	0	0	0	0	0	0	0	0	0	0	0	0	0	0	0	0	0	0
18454_01007	6847.88	4513.27	3378.12	RT	VPL	unknown	Tnnt1-IRES2-CreERT2;Ai82;Ai140_373367-18454	18454	TH_core		0	26540.1	49.7978	664.454	1453.64	14416	0	688.371	733.273	419.383	0	0	0	0	0	0	0	0	0	0	0	0	0	0	0	0	0	0	0	0	0	0	0	0	0	4436.47	0	0	0
18454_01009	6968.45	4069.18	3540.58	VPM	VPM	unknown	Tnnt1-IRES2-CreERT2;Ai82;Ai140_373367-18454	18454	TH_core		0	0	0	10264.7	1157.82	0	0	638.034	0	5258.14	0	0	0	0	0	0	0	0	0	0	0	0	0	0	0	0	0	0	0	0	0	0	0	0	0	0	0	0	0
18454_01010	6966.73	4001.38	3611.42	VPM	VPM	unknown	Tnnt1-IRES2-CreERT2;Ai82;Ai140_373367-18454	18454	TH_core		0	0	0	19222.5	0	0	10.0054	0	0	3558.53	0	0	0	0	0	0	0	0	0	0	0	0	0	0	0	0	0	0	0	0	0	0	0	0	0	0	0	0	0
18454_01011	6982.4	4172.48	3585.42	VPM	VPM	unknown	Tnnt1-IRES2-CreERT2;Ai82;Ai140_373367-18454	18454	TH_core		0	0	0	6333.3	0	0	1043.99	1441.26	0	17189.6	0	0	0	0	0	0	0	0	0	0	0	0	0	0	0	0	0	0	0	0	0	0	0	0	0	0	0	0	0
18454_01012	6820.7	4161.8	3617.9	VPM	VPM	unknown	Tnnt1-IRES2-CreERT2;Ai82;Ai140_373367-18454	18454	TH_core		0	0	0	0	0	0	0	17591.6	0	99.82	0	0	0	0	0	0	0	0	0	0	0	0	0	0	0	0	0	0	0	0	0	0	0	0	0	0	0	0	0
18454_01013	6935.88	4159.08	3928.42	VPM	VPM	unknown	Tnnt1-IRES2-CreERT2;Ai82;Ai140_373367-18454	18454	TH_core		0	0	0	0	0	0	23855.2	0	0	229.208	0	0	0	0	0	0	0	0	0	0	0	0	0	0	0	0	0	0	0	0	0	0	0	0	0	0	0	0	0
18454_01014	6790.38	4280.95	4024.45	VPM	VPM	unknown	Tnnt1-IRES2-CreERT2;Ai82;Ai140_373367-18454	18454	TH_core	large arbor, single	0	7684.75	1600.2	0	0	0	24143	209.254	0	0	0	0	0	0	0	0	0	0	0	0	0	0	0	0	0	0	0	0	0	0	0	0	0	0	0	0	0	0	0
18454_01015	6831.23	4480.45	3830.52	VPM	VPM	unknown	Tnnt1-IRES2-CreERT2;Ai82;Ai140_373367-18454	18454	TH_core		0	317.733	0	0	0	0	23524.5	5540.14	0	0	0	0	0	0	0	0	0	0	0	0	0	0	0	0	0	0	0	0	0	0	0	0	0	0	0	0	0	0	0
18454_01018	6885.42	4563.55	4159.9	VPM	VPM	unknown	Tnnt1-IRES2-CreERT2;Ai82;Ai140_373367-18454	18454	TH_core		0	889.401	0	0	0	0	30835.9	0	0	0	0	0	0	0	0	0	0	0	0	0	0	0	0	0	0	0	0	0	0	0	0	0	0	0	0	0	0	0	0
18454_01021	7347.5	2746.18	3769.1	CA3	LGd	unknown	Tnnt1-IRES2-CreERT2;Ai82;Ai140_373367-18454	18454	TH_core		0	0	0	0	0	0	0	0	0	0	0	0	0	0	448.376	389.724	0	339.738	0	399.079	39534.9	0	0	0	0	0	0	0	0	0	0	0	0	0	0	39.8792	0	0	0
18454_01022	7067.75	3153.18	3481.35	LGd	LD	unknown	Tnnt1-IRES2-CreERT2;Ai82;Ai140_373367-18454	18454			0	837.765	8721.02	0	286.825	628.596	0	0	1227.9	0	0	0	0	0	0	0	0	0	19804	0	209.616	0	4637.64	0	0	12230.3	0	0	0	0	0	0	0	0	0	10309.4	1923.52	489.168	469.587
18454_01023	7116.42	3545.18	3102.72	fiber tracts	VPL	unknown	Tnnt1-IRES2-CreERT2;Ai82;Ai140_373367-18454	18454	TH_core		0	0	0	0	1263.96	0	0	0	515.636	0	0	0	0	0	0	0	0	0	0	0	169.181	0	0	0	0	0	0	0	0	0	0	0	0	0	0	0	0	0	6929.37
18454_01027	7502.52	3385.62	3378.4	LGd	VPM	unknown	Tnnt1-IRES2-CreERT2;Ai82;Ai140_373367-18454	18454	TH_core		0	0	0	0	24180.8	0	0	0	0	0	0	0	0	289.027	807.45	229.694	0	238.547	0	0	0	0	0	0	0	0	0	0	0	0	0	0	0	0	0	0	0	0	0
18454_01030	7209.2	3777.52	3101.72	RT	VPL	unknown	Tnnt1-IRES2-CreERT2;Ai82;Ai140_373367-18454	18454	TH_core		0	0	0	0	921.28	0	0	0	1936.15	128.962	0	0	0	0	0	0	0	0	0	0	0	0	0	0	0	0	0	0	0	0	0	0	0	0	0	0	0	0	9092.11
18454_01031	7259.15	3747.85	3110.53	RT	VPL	unknown	Tnnt1-IRES2-CreERT2;Ai82;Ai140_373367-18454	18454	TH_core		0	0	0	0	1777.52	0	0	0	848.892	0	579.091	0	0	658.344	0	0	0	0	0	0	0	0	0	0	0	0	0	0	0	0	0	0	0	0	0	0	0	0	12835.3
18454_01032	7298.8	3944.57	3122.75	RT	VPL	unknown	Tnnt1-IRES2-CreERT2;Ai82;Ai140_373367-18454	18454	TH_core		0	0	0	0	129.946	0	0	0	776.539	0	589.352	0	0	1241.17	0	0	69.6801	0	0	0	0	0	0	0	0	0	0	0	0	0	0	0	0	0	0	0	0	0	12159.9
18454_01033	7253.88	3943	3160.5	RT	VPL	unknown	Tnnt1-IRES2-CreERT2;Ai82;Ai140_373367-18454	18454	TH_core	small arbor, single	0	0	0	0	1782.24	0	0	750.451	16855.9	2883.7	0	0	0	0	0	0	0	0	0	0	0	0	0	0	0	0	0	0	0	0	0	0	0	0	0	0	0	0	189.291
18454_01034	7446.17	3718.02	3182.03	LGv	VPL	unknown	Tnnt1-IRES2-CreERT2;Ai82;Ai140_373367-18454	18454	TH_core		0	0	0	0	1692.02	0	0	0	0	0	1957	0	0	1094.8	0	0	318.297	0	0	0	69.9318	0	0	0	0	0	0	0	0	0	0	0	0	0	0	0	0	0	3605.41
18454_01035	7337.92	3820.35	3192.25	LGv	VPL	unknown	Tnnt1-IRES2-CreERT2;Ai82;Ai140_373367-18454	18454	TH_core		0	0	0	0	3719.12	0	0	0	49.8553	0	387.971	0	0	0	0	0	0	0	0	0	0	0	0	0	0	0	0	0	0	0	0	0	0	0	0	0	0	0	6387.02
18454_01038	7039.3	3698.07	3190.92	RT	VPL	unknown	Tnnt1-IRES2-CreERT2;Ai82;Ai140_373367-18454	18454	TH_core		0	0	0	0	1093.82	19.9029	0	11206.5	5021.45	7251.5	0	0	0	0	0	0	0	0	0	0	0	0	0	0	0	0	0	0	0	0	0	0	0	0	0	0	0	0	0
18454_01039	7263.2	3730.62	3293.02	fiber tracts	VPM	unknown	Tnnt1-IRES2-CreERT2;Ai82;Ai140_373367-18454	18454	TH_core		0	0	0	0	25943.3	0	0	0	0	0	846.963	0	0	519.092	0	0	0	0	0	0	0	0	0	0	0	0	0	0	0	0	0	0	0	0	0	0	0	0	0
18454_01040	7036.15	3715.93	3308.55	RT	VPL	unknown	Tnnt1-IRES2-CreERT2;Ai82;Ai140_373367-18454	18454	TH_core		0	0	0	0	12991.5	0	0	235.119	0	2654.1	0	0	0	0	0	0	0	0	0	0	0	0	0	0	0	0	0	0	0	0	0	0	0	0	0	0	0	0	0
18454_01041	7208.6	3648.85	3330.95	fiber tracts	VPM	unknown	Tnnt1-IRES2-CreERT2;Ai82;Ai140_373367-18454	18454	TH_core		0	0	0	783.904	16364.3	0	0	119.193	0	3124.31	0	0	0	0	0	0	0	0	0	0	0	0	0	0	0	0	0	0	0	0	0	0	0	0	0	0	0	0	0
18454_01042	7202.73	3773.7	3327.2	VPM	VPM	unknown	Tnnt1-IRES2-CreERT2;Ai82;Ai140_373367-18454	18454	TH_core		0	0	0	643.724	22924.7	0	0	0	0	0	0	0	0	0	0	0	0	0	0	0	0	0	0	0	0	0	0	0	0	0	0	0	0	0	0	0	0	0	0
18454_01043	7184.48	3704.88	3464.3	VPM	VPM	unknown	Tnnt1-IRES2-CreERT2;Ai82;Ai140_373367-18454	18454	TH_core		0	0	0	0	23059.1	0	0	0	0	0	992.373	0	0	0	0	0	0	0	0	0	0	0	0	0	0	0	0	0	0	0	0	0	0	0	0	0	0	0	0
18454_01044	7143.73	3895.62	3285.85	VPM	VPM	unknown	Tnnt1-IRES2-CreERT2;Ai82;Ai140_373367-18454	18454	TH_core		0	0	0	0	17725	0	0	0	0	762.499	315.284	0	0	0	0	0	0	0	0	0	0	0	0	0	0	0	0	0	0	0	0	0	0	0	0	0	0	0	0
18454_01045	7188.12	3800.65	3192.5	RT	VPL	unknown	Tnnt1-IRES2-CreERT2;Ai82;Ai140_373367-18454	18454	TH_core		0	0	0	0	11388.5	0	0	0	1504.52	4334.04	0	0	0	0	0	0	0	0	0	0	0	0	0	0	0	0	0	0	0	0	0	0	0	0	0	0	0	0	299.806
18454_01047	7226.25	3881.25	3444	VPM	VPM	unknown	Tnnt1-IRES2-CreERT2;Ai82;Ai140_373367-18454	18454	TH_core		0	0	0	0	25258.3	0	0	0	0	0	1021.8	0	0	0	0	0	0	0	0	0	0	0	0	0	0	0	0	0	0	0	0	0	0	0	0	0	0	0	0
18454_01048	7436.27	3842.32	3422.23	VPM	VPM	unknown	Tnnt1-IRES2-CreERT2;Ai82;Ai140_373367-18454	18454	TH_core		0	0	0	450.276	44337	0	0	0	0	0	244.457	0	0	0	0	0	0	0	0	0	0	0	0	0	0	0	0	0	0	0	0	0	0	0	0	0	0	0	0
18454_01049	7461.02	3950.75	3472.73	VPM	VPM	unknown	Tnnt1-IRES2-CreERT2;Ai82;Ai140_373367-18454	18454	TH_core		0	0	0	0	36630.1	0	0	0	0	0	2885.16	0	39.9193	0	0	0	315.886	0	0	0	0	0	0	0	0	0	0	0	0	0	0	0	0	0	0	0	0	0	0
18454_01050	7835.23	3556.32	3039.42	LGd	LGd	unknown	Tnnt1-IRES2-CreERT2;Ai82;Ai140_373367-18454	18454	TH_core		0	0	0	0	0	0	0	0	0	0	0	0	0	0	628.693	169.861	0	0	0	519.805	2532.83	0	674.141	319.563	0	0	0	0	0	0	0	0	0	0	0	11725.5	910.934	0	0
18454_01051	7024.52	3612.9	3439.12	fiber tracts	VPM	unknown	Tnnt1-IRES2-CreERT2;Ai82;Ai140_373367-18454	18454	TH_core		0	0	0	68.2747	22175.9	0	0	246.129	0	5797.16	0	0	0	0	0	0	0	0	0	0	0	0	0	0	0	0	0	0	0	0	0	0	0	0	0	0	0	0	0
18454_01052	7042.15	3680.15	3690.33	VPM	VPM	unknown	Tnnt1-IRES2-CreERT2;Ai82;Ai140_373367-18454	18454	TH_core		0	0	0	3743.08	2798.42	0	0	0	0	542.692	0	0	0	0	0	0	0	0	0	0	0	0	0	0	0	0	0	0	0	0	0	0	0	0	0	0	0	0	0
18454_01053	7177.15	3628.8	3644.35	VPM	VPM	unknown	Tnnt1-IRES2-CreERT2;Ai82;Ai140_373367-18454	18454	TH_core		0	0	0	21038.2	924.454	0	0	0	0	0	1263.81	0	0	0	0	0	0	0	0	0	0	0	0	0	0	0	0	0	0	0	0	0	0	0	0	0	0	0	0
18454_01054	7348.92	3735.45	3593.65	VPM	VPM	unknown	Tnnt1-IRES2-CreERT2;Ai82;Ai140_373367-18454	18454	TH_core		0	0	0	186.788	19416.5	0	0	0	0	0	1032.51	0	0	0	0	0	0	0	0	0	0	0	0	0	0	0	0	0	0	0	0	0	0	0	0	0	0	0	0
18454_01055	7207.08	3976.82	3211.25	fiber tracts	VPM	unknown	Tnnt1-IRES2-CreERT2;Ai82;Ai140_373367-18454	18454	TH_core	small arbor, single	0	0	0	167.347	16084.7	0	0	69.7659	770.189	5934.64	159.501	0	0	0	0	0	0	0	0	0	0	0	0	0	0	0	0	0	0	0	0	0	0	0	0	0	0	0	0
18454_01056	6995.15	4137.88	3476.17	VPM	VPM	unknown	Tnnt1-IRES2-CreERT2;Ai82;Ai140_373367-18454	18454	TH_core		0	0	0	2442.38	1875	0	0	9.99795	0	13138	0	0	0	0	0	0	0	0	0	0	0	0	0	0	0	0	0	0	0	0	0	0	0	0	0	0	0	0	0
18454_01059	7058.77	4126.08	3615.9	VPM	VPM	unknown	Tnnt1-IRES2-CreERT2;Ai82;Ai140_373367-18454	18454	TH_core		0	0	0	18442.5	0	0	0	2407.92	0	1125.82	0	0	0	0	0	0	0	0	0	0	0	0	0	0	0	0	0	0	0	0	0	0	0	0	0	0	0	0	0
18454_01060	7316.35	4093.8	3709.98	VPM	VPM	unknown	Tnnt1-IRES2-CreERT2;Ai82;Ai140_373367-18454	18454	TH_core		0	0	0	34650.9	0	0	59.9285	0	0	0	1839.64	0	0	0	0	0	0	0	0	0	0	0	0	0	0	0	0	0	0	0	0	0	0	0	0	0	0	0	0
18454_01061	7256.58	4132.25	3672.05	VPM	VPM	unknown	Tnnt1-IRES2-CreERT2;Ai82;Ai140_373367-18454	18454	TH_core		0	0	0	33774.5	1113.98	0	0	0	0	2406.55	1244.17	0	0	0	0	0	0	0	0	0	0	0	0	0	0	0	0	0	0	0	0	0	0	0	0	0	0	0	0
18454_01062	6993.45	4166.1	3810.8	VPM	VPM	unknown	Tnnt1-IRES2-CreERT2;Ai82;Ai140_373367-18454	18454	TH_core		0	0	0	4900.7	0	0	18507.8	0	0	0	0	0	0	0	0	0	0	0	0	0	0	0	0	0	0	0	0	0	0	0	0	0	0	0	0	0	0	0	0
18454_01063	7207.52	4085.35	3742.35	VPM	VPM	unknown	Tnnt1-IRES2-CreERT2;Ai82;Ai140_373367-18454	18454	TH_core		0	0	0	33534.2	904.708	0	649.179	0	0	0	3071.66	0	0	0	0	0	0	0	0	0	0	0	0	0	0	0	0	0	0	0	0	0	0	0	0	0	0	0	0
18454_01064	7123.8	4428.3	3835.73	VPM	VPM	unknown	Tnnt1-IRES2-CreERT2;Ai82;Ai140_373367-18454	18454	TH_core		0	6918.59	0	109.979	0	0	15437.6	0	0	0	5126.16	0	0	0	0	0	0	0	0	0	0	0	0	0	0	0	0	0	0	0	0	0	0	0	0	0	0	0	0
18454_01066	7022.12	4584.35	4103.95	VPM	VPM	unknown	Tnnt1-IRES2-CreERT2;Ai82;Ai140_373367-18454	18454	TH_core		0	29.996	0	0	0	0	49665.1	0	0	0	0	0	0	0	0	0	0	0	0	0	0	0	0	0	0	0	0	0	0	0	0	0	0	0	0	0	0	0	0
18454_01067	7168.33	4471.7	4196.27	VPM	VPM	unknown	Tnnt1-IRES2-CreERT2;Ai82;Ai140_373367-18454	18454	TH_core		0	0	0	159.506	0	0	31556.9	0	0	0	69.8139	199.591	0	0	0	0	0	0	0	0	0	0	0	0	0	0	0	0	0	0	0	0	0	0	0	0	0	0	0
18454_01069	6983.02	4720.98	3987.98	VPM	VPL	unknown	Tnnt1-IRES2-CreERT2;Ai82;Ai140_373367-18454	18454	TH_core		0	3048.38	0	901.727	0	0	29870.2	0	0	0	0	0	0	0	0	0	0	0	0	0	0	0	0	0	0	0	0	0	0	0	0	0	0	0	0	0	0	0	0
18454_01073	7255.25	4744.55	4252.55	VPM	VPM	unknown	Tnnt1-IRES2-CreERT2;Ai82;Ai140_373367-18454	18454	TH_core		0	5354.28	0	0	0	0	7224.6	0	0	0	18840.6	0	0	0	0	0	0	0	0	0	0	0	0	0	0	0	0	0	0	0	0	0	0	0	0	0	0	0	0
18454_01074	7303.6	4672.12	4126.08	VPM	VPM	unknown	Tnnt1-IRES2-CreERT2;Ai82;Ai140_373367-18454	18454	TH_core		0	5477.05	0	0	0	0	4238.73	0	0	0	23485.5	697.69	2054.13	0	0	0	0	0	0	0	0	0	0	0	0	0	0	0	0	0	0	0	0	0	0	0	0	0	0
18454_01078	5620.58	3552.45	3377.93	CP	CP	unknown	Tnnt1-IRES2-CreERT2;Ai82;Ai140_373367-18454	18454	CP_GPe		0	0	0	0	0	0	0	0	0	0	0	0	0	0	0	0	0	0	0	0	0	0	0	0	0	0	0	0	0	0	0	0	0	0	0	0	0	0	0
18454_01080	7154.08	3800.62	3694.43	VPM	VPM	unknown	Tnnt1-IRES2-CreERT2;Ai82;Ai140_373367-18454	18454	TH_core		0	0	0	0	15446.5	0	0	0	0	0	3617.98	0	0	0	0	0	0	0	0	0	0	0	0	0	0	0	0	0	0	0	0	0	0	0	0	0	0	0	0
18454_01081	7351.88	3803.95	3669.88	VPM	VPM	unknown	Tnnt1-IRES2-CreERT2;Ai82;Ai140_373367-18454	18454	TH_core		0	0	0	0	1126.97	0	0	0	0	0	18214.6	0	0	0	0	0	0	0	0	0	0	0	0	0	0	0	0	0	0	0	0	0	0	0	0	0	0	0	0
18454_01082	7093.75	3843.15	3658.7	VPM	VPM	unknown	Tnnt1-IRES2-CreERT2;Ai82;Ai140_373367-18454	18454	TH_core		0	0	0	605.118	31821.2	0	0	0	0	0	1635.29	0	0	0	0	0	0	0	0	0	0	0	0	0	0	0	0	0	0	0	0	0	0	0	0	0	0	0	0
18454_01085	7303.27	3840.7	3603.02	VPM	VPM	unknown	Tnnt1-IRES2-CreERT2;Ai82;Ai140_373367-18454	18454	TH_core		0	0	0	0	5285.17	0	0	0	0	0	12821.7	0	0	0	0	0	0	0	0	0	0	0	0	0	0	0	0	0	0	0	0	0	0	0	0	0	0	0	0
18454_01086	7217.85	3877.5	3492.98	VPM	VPM	unknown	Tnnt1-IRES2-CreERT2;Ai82;Ai140_373367-18454	18454	TH_core		0	0	0	0	18803.1	0	0	0	0	0	747.255	0	0	0	0	0	0	0	0	0	0	0	0	0	0	0	0	0	0	0	0	0	0	0	0	0	0	0	0
18454_01089	7438.62	3914.98	3387.18	VPM	VPM	unknown	Tnnt1-IRES2-CreERT2;Ai82;Ai140_373367-18454	18454	TH_core		0	0	0	0	24987.3	0	0	0	0	0	349.791	0	0	838.411	19.961	0	227.985	0	0	0	0	0	0	0	0	0	0	0	0	0	0	0	0	0	0	0	0	0	0
18454_01090	7074.88	3897.82	3310.5	VPM	VPM	unknown	Tnnt1-IRES2-CreERT2;Ai82;Ai140_373367-18454	18454	TH_core		0	0	0	0	16459.1	0	0	0	0	0	406.677	0	0	0	0	0	0	0	0	0	0	0	0	0	0	0	0	0	0	0	0	0	0	0	0	0	0	0	0
18454_01091	7177.1	3721.25	3295.05	RT	VPL	unknown	Tnnt1-IRES2-CreERT2;Ai82;Ai140_373367-18454	18454	TH_core		0	0	0	0	23538.8	0	0	0	0	0	409.574	0	0	633.845	0	0	0	0	9.9994	0	3467.7	0	0	0	0	0	0	0	0	0	0	0	0	0	0	0	0	0	3948.06
18454_01092	7549.02	3777.93	3446.73	VPM	VPM	unknown	Tnnt1-IRES2-CreERT2;Ai82;Ai140_373367-18454	18454	TH_core		0	0	0	0	603.624	0	0	0	0	0	7871.36	0	0	10684.5	668.231	838.415	549.642	0	0	0	0	0	0	0	0	0	0	0	0	0	0	0	0	0	0	0	0	0	0
18454_01093	7615.35	3843.2	3467.93	VPM	VPM	unknown	Tnnt1-IRES2-CreERT2;Ai82;Ai140_373367-18454	18454	TH_core		0	0	0	0	0	0	0	0	0	0	725.463	0	0	27561.3	246.837	0	435.614	0	0	0	0	0	0	0	0	0	0	0	0	0	0	0	0	0	0	0	0	0	0
18454_01095	7236.25	3944.9	3722.12	VPM	VPM	unknown	Tnnt1-IRES2-CreERT2;Ai82;Ai140_373367-18454	18454	TH_core		0	0	0	0	799.364	0	0	0	0	0	12433.2	0	0	0	0	0	0	0	0	0	0	0	0	0	0	0	0	0	0	0	0	0	0	0	0	0	0	0	0
18454_01096	7355.5	4028.75	3704.98	VPM	VPM	unknown	Tnnt1-IRES2-CreERT2;Ai82;Ai140_373367-18454	18454	TH_core		0	0	0	0	84.0034	0	0	0	0	0	20396.8	0	0	0	0	0	548.521	0	0	0	0	0	0	0	0	0	0	0	0	0	0	0	0	0	0	0	0	0	0
18454_01097	7274.62	4056.73	3710.7	VPM	VPM	unknown	Tnnt1-IRES2-CreERT2;Ai82;Ai140_373367-18454	18454	TH_core		0	0	0	0	1137.12	0	0	0	0	0	14612.5	0	0	0	0	0	0	0	0	0	0	0	0	0	0	0	0	0	0	0	0	0	0	0	0	0	0	0	0
18454_01098	7116.6	4020.82	3715.73	VPM	VPM	unknown	Tnnt1-IRES2-CreERT2;Ai82;Ai140_373367-18454	18454	TH_core		0	0	0	5902.94	9398.53	0	0	0	0	0	861.45	0	0	0	0	0	0	0	0	0	0	0	0	0	0	0	0	0	0	0	0	0	0	0	0	0	0	0	0
18454_01100	6922.45	4166.9	3527.12	VPM	VPM	unknown	Tnnt1-IRES2-CreERT2;Ai82;Ai140_373367-18454	18454	TH_core		0	0	0	831.282	18825.5	0	0	0	0	20.0068	0	0	0	0	0	0	0	0	0	0	0	0	0	0	0	0	0	0	0	0	0	0	0	0	0	0	0	0	0
18454_01101	7098.92	4135.88	3551.82	VPM	VPM	unknown	Tnnt1-IRES2-CreERT2;Ai82;Ai140_373367-18454	18454	TH_core		0	0	0	0	23486.7	0	0	0	0	0	471.573	0	0	0	0	0	0	0	0	0	0	0	0	0	0	0	0	0	0	0	0	0	0	0	0	0	0	0	0
18454_01103	7165.5	4038.27	3622.38	VPM	VPM	unknown	Tnnt1-IRES2-CreERT2;Ai82;Ai140_373367-18454	18454	TH_core		0	0	0	395.781	14413	0	0	0	0	0	3502.96	0	0	0	0	0	0	0	0	0	0	0	0	0	0	0	0	0	0	0	0	0	0	0	0	0	0	0	0
18454_01104	7443.02	3967.23	3591.5	VPM	VPM	unknown	Tnnt1-IRES2-CreERT2;Ai82;Ai140_373367-18454	18454	TH_core		0	0	0	0	229.016	0	0	0	0	0	23287.8	0	0	359.044	717.532	0	526.124	0	0	0	0	0	0	0	0	0	0	0	0	0	0	0	0	0	0	0	0	0	0
18454_01105	7280.77	4066	3517.27	VPM	VPM	unknown	Tnnt1-IRES2-CreERT2;Ai82;Ai140_373367-18454	18454	TH_core		0	0	0	0	13548.1	0	0	0	0	0	459.396	0	0	323.956	658.102	0	494.896	0	0	0	0	0	0	0	0	0	0	0	0	0	0	0	0	0	0	0	0	0	0
18454_01106	7196.3	4027.82	3435.1	VPM	VPM	unknown	Tnnt1-IRES2-CreERT2;Ai82;Ai140_373367-18454	18454	TH_core		0	0	0	0	19493.4	0	0	0	0	0	159.88	0	0	0	0	0	0	0	0	0	0	0	0	0	0	0	0	0	0	0	0	0	0	0	0	0	0	0	0
18454_01107	7426.9	4107.58	3671.27	VPM	VPM	unknown	Tnnt1-IRES2-CreERT2;Ai82;Ai140_373367-18454	18454	TH_core		0	0	0	0	1610.5	0	0	0	0	0	31244.4	0	0	179.809	0	0	676.077	0	0	0	0	0	0	0	0	0	0	0	0	0	0	0	0	0	0	0	0	0	0
18454_01108	7423.17	4238.27	3562.98	VPL	VPM	unknown	Tnnt1-IRES2-CreERT2;Ai82;Ai140_373367-18454	18454	TH_core		0	0	0	0	34221	0	0	0	0	0	6565.09	0	402.193	801.233	0	0	389.326	0	0	0	0	0	0	0	0	0	0	0	0	0	0	0	0	0	0	0	0	0	0
18454_01109	7002.92	4019.35	3308.15	VPL	VPL	unknown	Tnnt1-IRES2-CreERT2;Ai82;Ai140_373367-18454	18454	TH_core		0	0	0	0	15585.8	0	0	0	0	0	297.328	0	0	0	0	0	0	0	0	0	0	0	0	0	0	0	0	0	0	0	0	0	0	0	0	0	0	0	0
18454_01110	7119.15	4111.85	3307.25	VPL	VPL	unknown	Tnnt1-IRES2-CreERT2;Ai82;Ai140_373367-18454	18454	TH_core		0	0	0	0	22892.2	0	0	0	0	0	1755.02	0	0	1200.26	0	0	451.237	0	0	0	0	0	0	0	0	0	0	0	0	0	0	0	0	0	0	0	0	0	0
18454_01111	7040.15	4142.4	3338.82	VPL	VPL	unknown	Tnnt1-IRES2-CreERT2;Ai82;Ai140_373367-18454	18454	TH_core		0	0	0	0	13719.3	0	0	0	0	0	524.936	0	0	0	0	0	0	0	0	0	0	0	0	0	0	0	0	0	0	0	0	0	0	0	0	0	0	0	0
18454_01112	7187.02	3970.93	3319.38	VPM	VPL	unknown	Tnnt1-IRES2-CreERT2;Ai82;Ai140_373367-18454	18454	TH_core		0	0	0	0	14289.4	0	0	0	0	0	608.225	0	0	598.989	0	0	398.143	0	0	0	0	0	0	0	0	0	0	0	0	0	0	0	0	0	0	0	0	0	0
18454_01113	7429.15	3985.8	3359.25	VPL	VPM	unknown	Tnnt1-IRES2-CreERT2;Ai82;Ai140_373367-18454	18454	TH_core		0	0	0	0	19527.2	0	0	0	0	0	479.33	0	0	519.453	808.91	0	466.575	0	0	0	0	0	0	0	0	0	0	0	0	0	0	0	0	0	0	0	0	0	0
18454_01114	7329.65	4099.98	3349.38	VPL	VPL	unknown	Tnnt1-IRES2-CreERT2;Ai82;Ai140_373367-18454	18454	TH_core		0	0	0	0	13233.3	0	0	0	0	0	299.252	0	0	688.775	535.383	0	168.191	0	0	0	0	0	0	0	0	0	0	0	0	0	0	0	0	0	0	0	0	0	0
18454_01115	7152.23	4122.83	3407.8	VPL	VPM	unknown	Tnnt1-IRES2-CreERT2;Ai82;Ai140_373367-18454	18454	TH_core		0	0	0	0	19446.2	0	0	0	0	0	846.945	0	0	0	0	0	0	0	0	0	0	0	0	0	0	0	0	0	0	0	0	0	0	0	0	0	0	0	0
18454_01116	7145.7	4164.05	3284.3	VPL	VPL	unknown	Tnnt1-IRES2-CreERT2;Ai82;Ai140_373367-18454	18454	TH_core		0	0	0	0	18315.1	0	0	0	0	0	499.081	0	0	711.047	648.712	0	186.51	0	0	0	0	0	0	0	0	0	0	0	0	0	0	0	0	0	0	0	0	0	0
18454_01117	7380.33	4150.6	3308.23	VPL	VPL	unknown	Tnnt1-IRES2-CreERT2;Ai82;Ai140_373367-18454	18454	TH_core		0	0	0	0	14425.9	0	0	0	0	0	229.307	0	0	0	0	0	0	0	0	0	0	0	0	0	0	0	0	0	0	0	0	0	0	0	0	0	0	0	0
18454_01118	7216.3	4243	3235.35	VPL	VPL	unknown	Tnnt1-IRES2-CreERT2;Ai82;Ai140_373367-18454	18454	TH_core		0	0	0	0	14612.9	0	0	0	0	0	1226.34	0	0	89.6862	0	0	169.784	0	0	0	0	0	0	0	0	0	0	0	0	0	0	0	0	0	0	0	0	0	0
18454_01119	7106.75	4241.95	3678.27	VPM	VPM	unknown	Tnnt1-IRES2-CreERT2;Ai82;Ai140_373367-18454	18454	TH_core		0	0	0	11366.9	3840.63	0	0	0	0	0	1253.1	0	0	0	0	0	0	0	0	0	0	0	0	0	0	0	0	0	0	0	0	0	0	0	0	0	0	0	0
18454_01120	6828.83	4321.98	3569.52	VPL	VPL	unknown	Tnnt1-IRES2-CreERT2;Ai82;Ai140_373367-18454	18454	TH_core		0	0	0	17094.1	1845.02	0	0	0	0	5842.42	0	0	0	0	0	0	0	0	0	0	0	0	0	0	0	0	0	0	0	0	0	0	0	0	0	0	0	0	0
18454_01121	6809.6	4319.9	3510	VPL	VPL	unknown	Tnnt1-IRES2-CreERT2;Ai82;Ai140_373367-18454	18454	TH_core		0	0	0	239.801	5188.8	0	0	4944.05	0	26701.6	0	0	0	0	0	0	0	0	0	0	0	0	0	0	0	0	0	0	0	0	0	0	0	0	0	0	0	0	0
18454_01122	6976.62	4461.83	3633.3	VPL	VPM	unknown	Tnnt1-IRES2-CreERT2;Ai82;Ai140_373367-18454	18454	TH_core		0	0	0	19166.6	0	0	0	0	0	0	2644.64	0	0	0	0	0	0	0	0	0	0	0	0	0	0	0	0	0	0	0	0	0	0	0	0	0	0	0	0
18454_01123	7292.67	4340.15	3275.88	VPL	VPL	unknown	Tnnt1-IRES2-CreERT2;Ai82;Ai140_373367-18454	18454	TH_core		0	0	0	0	15091	0	0	0	0	0	419.224	0	0	457.959	2123.76	0	399.849	0	0	0	0	0	0	0	0	0	0	0	0	0	0	0	0	0	0	0	0	0	0
18454_01124	7153.5	4405.92	3296.32	fiber tracts	VPL	unknown	Tnnt1-IRES2-CreERT2;Ai82;Ai140_373367-18454	18454	TH_core		0	0	0	0	13707.8	0	0	0	0	0	619.262	0	0	1639.82	0	0	616.677	0	0	0	0	0	0	0	0	0	0	0	0	0	0	0	0	0	0	0	0	0	0
18454_01125	7547.92	3995.77	3503.52	VPM	VPM	unknown	Tnnt1-IRES2-CreERT2;Ai82;Ai140_373367-18454	18454	TH_core		0	0	0	0	406.767	0	0	0	0	0	23060.7	0	0	6409.33	1036.08	0	536.331	0	0	0	0	0	0	0	0	0	0	0	0	0	0	0	0	0	0	0	0	0	0
18454_01126	7500.75	3951.3	3434.62	VPM	VPM	unknown	Tnnt1-IRES2-CreERT2;Ai82;Ai140_373367-18454	18454	TH_core		0	0	0	0	7211.38	0	0	0	0	0	10361.9	0	0	469.759	1117.61	49.9073	359.752	0	0	0	0	0	0	0	0	0	0	0	0	0	0	0	0	0	0	0	0	0	0
18454_01127	7477.12	4028.35	3384.35	VPL	LGd	unknown	Tnnt1-IRES2-CreERT2;Ai82;Ai140_373367-18454	18454	TH_core		0	0	0	0	0	0	0	0	0	0	0	0	0	589.339	898.036	0	129.654	39.9889	0	0	34186.1	0	0	0	0	0	0	0	0	0	0	0	0	0	0	0	0	0	0
18454_01130	6818.73	4802.05	3727.45	VPL	VPL	unknown	Tnnt1-IRES2-CreERT2;Ai82;Ai140_373367-18454	18454	TH_core		0	21227.7	0	2710.8	0	17046.5	0	11124.2	0	1888.08	0	0	0	0	0	0	0	0	0	0	0	0	0	0	0	0	0	0	0	0	0	0	0	0	0	0	0	0	0
18454_01131	6320.88	4993.95	5194.25	unknown	RE	unknown	Tnnt1-IRES2-CreERT2;Ai82;Ai140_373367-18454	18454	TH_matrix		29.9982	0	0	0	0	0	0	0	0	0	0	0	0	0	0	0	0	0	0	0	0	0	0	0	0	3078.15	0	3804.87	0	24102.8	5011.03	17629.6	0	0	0	0	0	0	0
18454_01132	7075.83	4847.3	3629.98	ZI	VPM	unknown	Tnnt1-IRES2-CreERT2;Ai82;Ai140_373367-18454	18454	TH_core		0	3006.89	0	685.708	607.216	456.11	0	25575.9	0	379.648	5590.65	0	0	0	0	0	0	0	0	0	0	0	0	0	0	0	0	0	0	0	0	0	0	0	0	0	0	0	0
18454_01133	7172.95	4816.1	3675.12	ZI	VPL	unknown	Tnnt1-IRES2-CreERT2;Ai82;Ai140_373367-18454	18454	TH_core		0	12063.4	0	1995.87	0	49.8032	119.856	16515.7	0	189.767	238.724	0	0	0	0	0	0	0	0	0	0	0	0	0	0	0	0	0	0	0	0	0	0	0	0	0	0	0	0
18454_01134	6982.83	4958.52	3755.98	ZI	VPL	unknown	Tnnt1-IRES2-CreERT2;Ai82;Ai140_373367-18454	18454	TH_core		0	9791.61	0	2240.15	0	89.12	0	22579.5	0	377.532	5139.04	0	0	0	0	0	0	0	0	0	0	0	0	0	0	0	0	0	0	0	0	0	0	0	0	0	0	0	0
18455_00002	6693.85	3280.45	2579.78	CP	CP	unknown	Tnnt1-IRES2-CreERT2;Ai82;Ai140_373368-18455	18455	CP_GPe		0	0	0	0	0	0	0	0	0	0	0	0	0	0	0	0	0	0	0	0	0	0	0	0	0	0	0	0	0	0	0	0	0	0	0	0	0	0	0
18455_00004	4932.5	2855.4	4407.73	CP	CP	unknown	Tnnt1-IRES2-CreERT2;Ai82;Ai140_373368-18455	18455	CP_GPe		0	0	0	0	0	0	0	0	0	0	0	0	0	0	0	0	0	0	0	0	0	0	0	0	0	0	0	0	0	0	0	0	0	0	0	0	0	0	0
18455_00005	5071.95	2952.32	3365.2	CP	CP	unknown	Tnnt1-IRES2-CreERT2;Ai82;Ai140_373368-18455	18455	CP_GPe		0	0	0	0	0	0	0	0	0	0	0	0	0	0	0	0	0	0	0	0	0	0	0	0	0	0	0	0	0	0	0	0	0	0	0	0	0	0	0
18455_00007	5036.1	3066.7	3320.9	CP	CP	unknown	Tnnt1-IRES2-CreERT2;Ai82;Ai140_373368-18455	18455	CP_GPe		0	0	0	0	0	0	0	0	0	0	0	0	0	0	0	0	0	0	0	0	0	0	0	0	0	0	0	0	0	0	0	0	0	0	0	0	0	0	0
18455_00008	5406.25	3002.9	3355.2	CP	CP	unknown	Tnnt1-IRES2-CreERT2;Ai82;Ai140_373368-18455	18455	CP_GPe		0	0	0	0	0	0	0	0	0	0	0	0	0	0	0	0	0	0	0	0	0	0	0	0	0	0	0	0	0	0	0	0	0	0	0	0	0	0	0
18455_00009	5400.2	3101.2	3173.38	CP	CP	unknown	Tnnt1-IRES2-CreERT2;Ai82;Ai140_373368-18455	18455	CP_GPe		0	0	0	0	0	0	0	0	0	0	0	0	0	0	0	0	0	0	0	0	0	0	0	0	0	0	0	0	0	0	0	0	0	0	0	0	0	0	0
18455_00012	4687.23	3263.1	3549.27	CP	CP	unknown	Tnnt1-IRES2-CreERT2;Ai82;Ai140_373368-18455	18455	CP_GPe		0	0	0	0	0	0	0	0	0	0	0	0	0	0	0	0	0	0	0	0	0	0	0	0	0	0	0	0	0	0	0	0	0	0	0	0	0	0	0
18455_00013	4892.1	3265.88	3994.52	CP	CP	unknown	Tnnt1-IRES2-CreERT2;Ai82;Ai140_373368-18455	18455	CP_GPe		0	0	0	0	0	0	0	0	0	0	0	0	0	0	0	0	0	0	0	0	0	0	0	0	0	0	0	0	0	0	0	0	0	0	0	0	0	0	0
18455_00014	5483.77	3253.38	4083.95	CP	CP	unknown	Tnnt1-IRES2-CreERT2;Ai82;Ai140_373368-18455	18455	CP_GPe		0	0	0	0	0	0	0	0	0	0	0	0	0	0	0	0	0	0	0	0	0	0	0	0	0	0	0	0	0	0	0	0	0	0	0	0	0	0	0
18455_00015	6790.55	3404.95	3785	VPL	VPM	unknown	Tnnt1-IRES2-CreERT2;Ai82;Ai140_373368-18455	18455	TH_core	large arbor, single	0	0	0	0	42571.1	0	0	0	0	0	0	0	0	0	0	0	0	0	0	0	0	0	0	0	0	0	0	0	0	0	0	0	0	0	0	0	0	0	0
18455_00016	4485.05	3033.48	4366.98	CP	CP	unknown	Tnnt1-IRES2-CreERT2;Ai82;Ai140_373368-18455	18455	CP_GPe		0	0	0	0	0	0	0	0	0	0	0	0	0	0	0	0	0	0	0	0	0	0	0	0	0	0	0	0	0	0	0	0	0	0	0	0	0	0	0
18455_00017	8076.77	3308.18	3484.77	LGd	LGd	unknown	Tnnt1-IRES2-CreERT2;Ai82;Ai140_373368-18455	18455	TH_core		0	0	0	0	0	0	0	0	0	0	0	0	0	0	0	0	0	0	0	0	16474.1	0	0	0	0	0	0	0	0	0	0	0	0	0	0	0	0	0	3849.62
18455_00018	7379.77	2925.7	3726	LGd	LGd	unknown	Tnnt1-IRES2-CreERT2;Ai82;Ai140_373368-18455	18455	TH_core		0	0	0	0	0	0	0	0	0	0	0	0	0	0	0	0	0	0	0	139.413	34494.2	139.79	0	0	0	0	0	0	0	0	0	0	0	0	0	0	0	0	0
18455_00019	6828.35	3617.62	3437.45	RT	VPL	unknown	Tnnt1-IRES2-CreERT2;Ai82;Ai140_373368-18455	18455	TH_core		0	0	0	0	3601.24	0	0	878.708	12089.2	12129.7	0	0	0	0	0	0	0	0	0	0	0	0	0	0	0	0	0	0	0	0	0	0	0	0	0	0	0	0	29.9739
18455_00020	7075.17	3636.82	3527.67	VPM	VPM	unknown	Tnnt1-IRES2-CreERT2;Ai82;Ai140_373368-18455	18455	TH_core		0	0	0	0	17420.7	0	0	0	0	0	0	0	0	0	0	0	0	0	0	0	0	0	0	0	0	0	0	0	0	0	0	0	0	0	0	0	0	0	0
18455_00021	7094.55	3631.6	3560.3	VPM	VPM	unknown	Tnnt1-IRES2-CreERT2;Ai82;Ai140_373368-18455	18455	TH_core		0	0	0	0	15854.8	0	0	0	0	0	0	0	0	0	0	0	0	0	0	0	0	0	0	0	0	0	0	0	0	0	0	0	0	0	0	0	0	0	0
18455_00022	6967.98	3462.7	3807.58	PO	VPM	unknown	Tnnt1-IRES2-CreERT2;Ai82;Ai140_373368-18455	18455	TH_core		0	0	0	0	18872.8	0	0	0	0	0	0	0	0	0	0	0	0	0	0	0	0	0	0	0	0	0	0	0	0	0	0	0	0	0	0	0	0	0	0
18455_00023	6876.98	3193.75	4354.85	LD	PO	unknown	Tnnt1-IRES2-CreERT2;Ai82;Ai140_373368-18455	18455	TH_matrix		0	28803.5	14559.2	0	2748.41	4925.96	0	9452.49	1293.06	6647.16	0	0	0	0	0	0	0	0	0	0	0	0	0	0	0	199.796	0	0	0	0	0	0	0	0	0	0	0	0	97.2792
18455_00026	5483.55	2444.45	3791.4	fiber tracts	CP	unknown	Tnnt1-IRES2-CreERT2;Ai82;Ai140_373368-18455	18455	CP_GPe		0	119.377	0	0	0	0	0	416.74	0	0	0	0	0	0	0	0	0	0	0	0	0	0	0	0	0	0	0	0	0	0	0	0	0	0	0	0	0	0	0
18455_00028	5454.4	2734.18	3382.7	CP	CP	unknown	Tnnt1-IRES2-CreERT2;Ai82;Ai140_373368-18455	18455	CP_SNr		0	0	0	0	0	0	0	0	0	0	0	0	0	0	0	0	0	0	0	0	0	0	0	0	0	0	0	0	0	0	0	0	0	0	0	0	0	0	0
18455_00030	4090.7	3324.65	4200.65	CP	CP	unknown	Tnnt1-IRES2-CreERT2;Ai82;Ai140_373368-18455	18455	CP_GPe		0	0	0	0	0	0	0	0	0	0	0	0	0	0	0	0	0	0	0	0	0	0	0	0	0	0	0	0	0	0	0	0	0	0	0	0	0	0	0
18455_00031	5202.05	2964.5	3814.85	CP	CP	unknown	Tnnt1-IRES2-CreERT2;Ai82;Ai140_373368-18455	18455	CP_GPe		0	0	0	0	0	0	0	0	0	0	0	0	0	0	0	0	0	0	0	0	0	0	0	0	0	0	0	0	0	0	0	0	0	0	0	0	0	0	0
18455_00032	5524.27	3017.48	3615.18	CP	CP	unknown	Tnnt1-IRES2-CreERT2;Ai82;Ai140_373368-18455	18455	CP_GPe		0	0	0	0	0	0	0	0	0	0	0	0	0	0	0	0	0	0	0	0	0	0	0	0	0	0	0	0	0	0	0	0	0	0	0	0	0	0	0
18455_00033	4722.02	3073.75	3346.82	fiber tracts	CP	unknown	Tnnt1-IRES2-CreERT2;Ai82;Ai140_373368-18455	18455	CP_SNr		0	0	0	0	0	0	0	0	0	0	0	0	0	0	0	0	0	0	0	0	0	0	0	0	0	0	0	0	0	0	0	0	0	0	0	0	0	0	0
18455_00036	4910.27	3461.2	3435.95	CP	CP	unknown	Tnnt1-IRES2-CreERT2;Ai82;Ai140_373368-18455	18455	CP_GPe		0	0	0	0	0	0	0	0	0	0	0	0	0	0	0	0	0	0	0	0	0	0	0	0	0	0	0	0	0	0	0	0	0	0	0	0	0	0	0
18455_00037	5182.67	3426.55	2835.32	CP	CP	unknown	Tnnt1-IRES2-CreERT2;Ai82;Ai140_373368-18455	18455	CP_SNr		0	0	0	0	0	0	0	0	0	0	0	0	0	0	0	0	0	0	0	0	0	0	0	0	0	0	0	0	0	0	0	0	0	0	0	0	0	0	0
18455_00040	6263.42	2893.32	3142.25	CP	CP	unknown	Tnnt1-IRES2-CreERT2;Ai82;Ai140_373368-18455	18455	CP_GPe		0	0	0	0	0	0	0	0	0	0	0	0	0	0	0	0	0	0	0	0	0	0	0	0	0	0	0	0	0	0	0	0	0	0	0	0	0	0	0
18455_00041	6702	3312.57	2363.75	CP	CP	unknown	Tnnt1-IRES2-CreERT2;Ai82;Ai140_373368-18455	18455	CP_GPe		0	0	0	0	0	0	0	0	0	0	0	0	0	0	0	0	0	0	0	0	0	0	0	0	0	0	0	0	0	0	0	0	0	0	0	0	0	0	0
18455_00042	7306.33	3048.62	3365.65	LGd	LGd	unknown	Tnnt1-IRES2-CreERT2;Ai82;Ai140_373368-18455	18455	TH_core		0	0	0	0	19.9838	0	0	0	0	0	609.322	0	0	429.114	0	0	0	689.443	0	0	32161.1	0	0	0	0	0	0	0	0	0	0	0	0	0	0	0	0	0	0
18455_00043	7810.3	3135.73	3082.7	CA3	LGd	unknown	Tnnt1-IRES2-CreERT2;Ai82;Ai140_373368-18455	18455	TH_core		0	0	0	0	0	0	0	0	0	0	0	0	0	0	1026.98	409.608	0	239.908	0	519.886	22366.8	0	0	0	0	0	0	0	0	0	0	0	0	0	0	0	0	0	0
18455_00044	7755.52	3146.1	3307.57	LGd	LGd	unknown	Tnnt1-IRES2-CreERT2;Ai82;Ai140_373368-18455	18455	TH_core		0	0	0	0	0	0	0	0	0	0	0	0	0	0	0	0	0	79.9882	0	588.863	23950.3	0	0	159.829	9.98463	0	0	0	0	0	0	0	0	0	0	0	0	0	0
18455_00045	7800.75	3275.62	3257.5	LGd	LGd	unknown	Tnnt1-IRES2-CreERT2;Ai82;Ai140_373368-18455	18455	TH_core		0	0	0	0	0	0	0	0	0	0	0	0	0	0	978.872	319.829	0	49.9672	0	549.913	27675.3	0	0	189.8	0	0	0	0	0	0	0	0	0	0	0	0	0	0	0
18455_00046	7759.02	3350.62	2891.25	CA3	LGd	unknown	Tnnt1-IRES2-CreERT2;Ai82;Ai140_373368-18455	18455	TH_core		0	0	0	0	0	0	0	0	0	0	0	0	0	0	39.9423	209.836	849.04	0	0	2522.71	19307.3	0	1078.98	1231.38	0	0	0	0	0	0	0	0	0	0	0	428.161	0	0	0
18455_00047	7003.4	3471.6	3603.55	fiber tracts	VPM	unknown	Tnnt1-IRES2-CreERT2;Ai82;Ai140_373368-18455	18455	TH_core		0	0	0	0	20616.8	0	0	0	0	0	1687.28	0	0	349.978	0	0	105.783	0	0	0	0	0	0	0	0	0	0	0	0	0	0	0	0	0	0	0	0	0	0
18455_00048	7377.9	3504.4	3571.12	unknown	VPM	unknown	Tnnt1-IRES2-CreERT2;Ai82;Ai140_373368-18455	18455	TH_core		0	0	0	0	17469.3	0	0	0	0	0	27771.4	0	0	0	0	0	0	0	0	0	0	0	0	0	0	0	0	0	0	0	0	0	0	0	0	0	0	0	0
18455_00049	7104.08	3629.9	3271.85	RT	VPM	unknown	Tnnt1-IRES2-CreERT2;Ai82;Ai140_373368-18455	18455	TH_core		0	0	0	0	1778.77	0	0	0	0	0	379.586	0	0	409.282	857.193	0	0	0	0	0	158.31	0	0	0	0	0	0	0	0	0	0	0	0	0	0	0	0	0	11984
18455_00050	8228.17	3491.48	3225.93	unknown	MG	unknown	Tnnt1-IRES2-CreERT2;Ai82;Ai140_373368-18455	18455	TH_core	double targets	0	0	0	0	0	0	0	0	0	0	0	0	0	0	16306.7	59.7541	7630.07	0	0	0	0	0	0	0	0	0	0	0	0	0	0	0	0	0	0	0	0	0	0
18455_00106	5060.45	3437.15	3020.92	CP	CP	unknown	Tnnt1-IRES2-CreERT2;Ai82;Ai140_373368-18455	18455	CP_others		0	354.3	0	0	0	0	0	0	0	0	0	337.523	0	0	0	0	0	0	0	0	0	0	0	0	0	0	0	0	0	0	0	0	0	0	0	0	0	0	0
18455_00110	4958.52	3959.6	2704.95	CP	CP	unknown	Tnnt1-IRES2-CreERT2;Ai82;Ai140_373368-18455	18455	CP_SNr		0	0	0	0	0	0	0	0	0	0	0	219.647	0	0	0	0	0	0	0	0	0	0	0	0	0	0	0	0	0	0	0	0	246.295	0	0	0	0	0	0
18455_00119	5602.12	4009.02	2979.6	CP	CP	unknown	Tnnt1-IRES2-CreERT2;Ai82;Ai140_373368-18455	18455	CP_GPe		0	0	0	0	0	0	0	0	0	0	0	0	0	0	0	0	0	0	0	0	0	0	0	0	0	0	0	0	0	0	0	0	0	0	0	0	0	0	0
18455_00120	6759.27	3850.52	3461.35	VPM	VPL	unknown	Tnnt1-IRES2-CreERT2;Ai82;Ai140_373368-18455	18455	TH_core	small arbor, single	0	0	0	9.99388	1774.04	0	0	839.984	0	11133.4	0	0	0	0	0	0	0	0	0	0	0	0	0	0	0	0	0	0	0	0	0	0	0	0	0	0	0	0	0
18455_00121	6712.1	3906.52	3500.5	VPL	VPM	unknown	Tnnt1-IRES2-CreERT2;Ai82;Ai140_373368-18455	18455	TH_core		0	0	0	0	3621.78	0	0	977.655	0	16173.7	0	0	0	0	0	0	0	0	0	0	0	0	0	0	0	0	0	0	0	0	0	0	0	0	0	0	0	0	0
18455_00122	6784.1	3668.15	3831.12	VPM	VPM	unknown	Tnnt1-IRES2-CreERT2;Ai82;Ai140_373368-18455	18455	TH_core		0	0	0	17416.2	11095.1	0	169.475	169.227	0	18996.6	1239.85	0	0	0	0	0	0	0	0	0	0	0	0	0	0	0	0	0	0	0	0	0	0	0	0	0	0	0	0
18455_00123	6716.42	3654.45	4044.92	PO	PO	unknown	Tnnt1-IRES2-CreERT2;Ai82;Ai140_373368-18455	18455	TH_matrix		0	17132.8	20172.4	18850.3	1065.14	0	484.339	1039.05	0	1891.64	0	0	0	0	0	0	0	0	0	0	0	0	0	0	0	0	0	0	0	0	0	0	0	0	0	0	0	0	0
18455_00124	6532.15	4095.1	4041.27	VPM	PO	unknown	Tnnt1-IRES2-CreERT2;Ai82;Ai140_373368-18455	18455	TH_matrix		0	47608.7	8660.23	0	0	0	0	1590.57	0	267.804	0	0	0	0	0	0	0	0	0	0	0	0	0	0	0	0	0	0	0	0	0	0	0	0	0	0	0	0	0
18455_00125	6712.95	4796.58	3852.35	VPL	VPL	unknown	Tnnt1-IRES2-CreERT2;Ai82;Ai140_373368-18455	18455	TH_core		0	1062	0	0	0	0	0	28888.7	0	0	0	0	0	0	0	0	0	0	0	0	0	0	0	0	0	0	0	0	0	0	0	0	0	0	0	0	0	0	0
18455_00126	5914.3	4299.17	5558.3	PVT	PVT	unknown	Tnnt1-IRES2-CreERT2;Ai82;Ai140_373368-18455	18455	TH_matrix		688.659	0	0	0	0	0	0	0	0	0	0	0	0	0	0	0	0	0	0	0	0	0	0	0	0	139.895	2326.45	5993.92	1275.42	0	10184.6	0	0	0	0	0	0	0	0
18455_00127	6041.35	4536.75	5539.85	PT	CM	unknown	Tnnt1-IRES2-CreERT2;Ai82;Ai140_373368-18455	18455	TH_matrix		488.359	0	0	0	0	0	0	0	0	0	0	0	0	0	0	0	0	0	0	0	0	0	0	0	0	0	0	1260.92	649.544	4439.62	25540	562.867	1724.84	0	14176.7	0	0	0	0
18455_00132	6480.05	4929.9	5416.42	SMT	SMT	unknown	Tnnt1-IRES2-CreERT2;Ai82;Ai140_373368-18455	18455	TH_core	large arbor	0	0	0	0	0	0	0	0	0	0	0	0	0	0	0	0	0	0	0	0	0	0	0	0	0	0	539.655	789.53	0	51707.4	169.341	8852.56	0	0	5109.09	0	0	0	0
18455_00133	6609.2	4907.98	5597.55	RH	SMT	unknown	Tnnt1-IRES2-CreERT2;Ai82;Ai140_373368-18455	18455	TH_core	large arbor	0	0	0	0	0	0	0	0	0	0	0	0	0	0	0	0	0	0	0	0	0	0	0	0	0	0	0	0	0	60323.9	129.764	10161.9	69.0604	0	10767.7	0	0	0	0
18455_00134	6516	4832.73	5674.1	RH	RE	unknown	Tnnt1-IRES2-CreERT2;Ai82;Ai140_373368-18455	18455	TH_matrix		0	0	0	0	0	0	0	0	0	0	0	0	0	0	0	0	0	0	0	0	0	0	0	0	0	0	0	0	0	0	0	0	0	0	0	0	0	0	0
18455_00135	7309.2	4234.15	2001.1	CP	CP	unknown	Tnnt1-IRES2-CreERT2;Ai82;Ai140_373368-18455	18455	CP_GPe		0	0	0	0	0	0	0	0	0	0	0	0	0	0	0	0	0	0	0	0	0	0	0	0	0	0	0	0	0	0	0	0	0	0	0	0	0	0	0
18455_00136	7086.52	3792.52	3516.7	VPM	VPM	unknown	Tnnt1-IRES2-CreERT2;Ai82;Ai140_373368-18455	18455	TH_core		0	0	0	0	20619.2	0	0	0	0	0	129.064	0	0	0	0	0	0	0	0	0	0	0	0	0	0	0	0	0	0	0	0	0	0	0	0	0	0	0	0
18455_00137	6824.6	3871.4	3484.85	VPM	VPL	unknown	Tnnt1-IRES2-CreERT2;Ai82;Ai140_373368-18455	18455	TH_core		0	0	0	0	7497.11	0	0	320.594	0	7466.37	269.824	0	0	0	0	0	0	0	0	0	0	0	0	0	0	0	0	0	0	0	0	0	0	0	0	0	0	0	0
18455_00138	7126.4	3790.5	3411.25	VPM	VPM	unknown	Tnnt1-IRES2-CreERT2;Ai82;Ai140_373368-18455	18455	TH_core		0	0	0	0	23044.6	0	0	0	261.554	0	39.8081	0	0	0	0	0	0	0	0	0	0	0	0	0	0	0	0	0	0	0	0	0	0	0	0	0	0	0	0
18455_00139	6881.55	3966.2	3560.27	VPM	VPM	unknown	Tnnt1-IRES2-CreERT2;Ai82;Ai140_373368-18455	18455	TH_core		0	0	0	0	18562.7	0	0	0	0	1973.67	0	0	0	0	0	0	0	0	0	0	0	0	0	0	0	0	0	0	0	0	0	0	0	0	0	0	0	0	0
18455_00140	6803.65	3688.85	3561.73	VPM	VPM	unknown	Tnnt1-IRES2-CreERT2;Ai82;Ai140_373368-18455	18455	TH_core		0	0	0	0	41929.7	0	0	0	39.9824	469.543	0	0	0	0	0	0	0	0	0	0	0	0	0	0	0	0	0	0	0	0	0	0	0	0	0	0	0	0	0
18455_00141	6837.88	3595.45	3770.35	VPL	VPM	unknown	Tnnt1-IRES2-CreERT2;Ai82;Ai140_373368-18455	18455	TH_core		0	0	0	279.165	26937.3	0	0	0	0	39.9512	0	0	0	0	0	0	0	0	0	0	0	0	0	0	0	0	0	0	0	0	0	0	0	0	0	0	0	0	0
18455_00142	6989.9	3799.05	3801	VPM	VPM	unknown	Tnnt1-IRES2-CreERT2;Ai82;Ai140_373368-18455	18455	TH_core		0	0	0	8271.3	13006	0	0	0	0	0	3203.43	0	0	0	0	0	0	0	0	0	0	0	0	0	0	0	0	0	0	0	0	0	0	0	0	0	0	0	0
18455_00143	7201.25	3716.25	3749.33	VPM	VPM	unknown	Tnnt1-IRES2-CreERT2;Ai82;Ai140_373368-18455	18455	TH_core		0	0	0	0	27869.2	0	0	0	0	0	379.538	0	0	659.47	587.358	0	0	0	0	0	0	0	0	0	0	0	0	0	0	0	0	0	0	0	0	0	0	0	0
18455_00144	7244.77	3745.85	3898.35	VPM	VPM	unknown	Tnnt1-IRES2-CreERT2;Ai82;Ai140_373368-18455	18455	TH_core		0	0	0	2716.78	37561.1	0	0	0	0	0	5616.45	0	0	0	0	0	0	0	0	0	0	0	0	0	0	0	0	0	0	0	0	0	0	0	0	0	0	0	0
18455_00145	6864.48	4210.83	3725.77	VPM	VPM	unknown	Tnnt1-IRES2-CreERT2;Ai82;Ai140_373368-18455	18455	TH_core		0	0	0	3036.38	0	0	7511.99	118.755	0	13298.8	0	0	0	0	0	0	0	0	0	0	0	0	0	0	0	0	0	0	0	0	0	0	0	0	0	0	0	0	0
18455_00146	6893.1	4101.25	3872.35	VPM	VPM	unknown	Tnnt1-IRES2-CreERT2;Ai82;Ai140_373368-18455	18455	TH_core		0	0	0	23756	0	0	219.822	0	0	0	636.301	0	0	0	0	0	0	0	0	0	0	0	0	0	0	0	0	0	0	0	0	0	0	0	0	0	0	0	0
18455_00147	6794.8	4171.55	3838.52	VPM	VPM	unknown	Tnnt1-IRES2-CreERT2;Ai82;Ai140_373368-18455	18455	TH_core		0	0	0	13786.2	0	0	9581.46	49.8955	0	4151.18	0	0	0	0	0	0	0	0	0	0	0	0	0	0	0	0	0	0	0	0	0	0	0	0	0	0	0	0	0
18455_00148	6823.05	4131	3932.55	VPM	VPM	unknown	Tnnt1-IRES2-CreERT2;Ai82;Ai140_373368-18455	18455	TH_core		0	0	0	5455.53	0	0	26416.3	0	0	0	0	0	0	0	0	0	0	0	0	0	0	0	0	0	0	0	0	0	0	0	0	0	0	0	0	0	0	0	0
18455_00149	6823.1	4234.75	4225.08	VPM	VPM	unknown	Tnnt1-IRES2-CreERT2;Ai82;Ai140_373368-18455	18455	TH_core		0	0	0	0	0	0	33175.5	0	0	0	49.9256	0	0	0	0	0	0	0	0	0	0	0	0	0	0	0	0	0	0	0	0	0	0	0	0	0	0	0	0
18455_00150	7059.3	4660.6	4283.02	VPM	VPM	unknown	Tnnt1-IRES2-CreERT2;Ai82;Ai140_373368-18455	18455	TH_core		0	0	0	0	0	0	22132.3	0	0	0	12526.7	0	0	0	0	0	0	0	0	0	0	0	0	0	0	0	0	0	0	0	0	0	0	0	0	0	0	0	0
18455_00151	7291.62	4249.65	4290.45	VPM	VPM	unknown	Tnnt1-IRES2-CreERT2;Ai82;Ai140_373368-18455	18455	TH_core		0	0	0	0	0	0	0	0	0	0	43198.7	268.804	6134.08	0	0	0	0	0	0	0	0	0	0	0	0	0	0	0	0	0	0	0	0	0	0	0	0	0	0
18455_00152	6901.9	4624.08	3630.9	VPL	VPL	unknown	Tnnt1-IRES2-CreERT2;Ai82;Ai140_373368-18455	18455	TH_core	small arbor, double	0	0	0	0	2330.74	6768.04	0	19024.7	0	545.193	3732.33	0	0	69.6813	0	0	0	0	0	0	0	0	0	0	0	0	0	0	0	0	0	0	0	0	0	0	0	0	0
18455_00153	6850.02	4685.02	3748.05	VPL	VPL	unknown	Tnnt1-IRES2-CreERT2;Ai82;Ai140_373368-18455	18455	TH_core		0	2756.7	0	909.195	0	0	0	39808.3	0	239.448	1713.93	0	0	0	0	0	0	0	0	0	0	0	0	0	0	0	0	0	0	0	0	0	0	0	0	0	0	0	0
18455_00154	6971.52	4639.27	4074.88	VPM	VPM	unknown	Tnnt1-IRES2-CreERT2;Ai82;Ai140_373368-18455	18455	TH_core	large arbor, double	0	316.296	0	698.251	0	0	39751.3	0	0	0	5741.18	0	0	0	0	0	0	0	0	0	0	0	0	0	0	0	0	0	0	0	0	0	0	0	0	0	0	0	0
18455_00155	6850.77	4792.8	4108.05	VPM	VPM	unknown	Tnnt1-IRES2-CreERT2;Ai82;Ai140_373368-18455	18455	TH_core		0	337.608	0	380.117	0	0	31100	0	0	0	209.256	0	0	0	0	0	0	0	0	0	0	0	0	0	0	0	0	0	0	0	0	0	0	0	0	0	0	0	0
18455_00156	6851.4	3846.65	4429.95	PO	VPM	unknown	Tnnt1-IRES2-CreERT2;Ai82;Ai140_373368-18455	18455	TH_core		0	35350.8	0	2014.04	0	0	16124.4	1175.22	0	0	0	0	0	0	0	0	0	0	0	0	0	0	0	0	0	0	0	0	0	0	0	0	0	0	0	0	0	0	0
18455_00157	7137.9	4390.83	4541.77	PO	VPM	unknown	Tnnt1-IRES2-CreERT2;Ai82;Ai140_373368-18455	18455	TH_core		0	0	0	0	0	0	29724.6	0	0	0	7178.63	1612.28	0	0	0	0	0	0	0	0	0	0	0	0	0	0	0	0	0	0	0	0	0	0	0	0	0	0	0
18455_00158	7436.7	4243.33	4606.1	PO	VPMpc	unknown	Tnnt1-IRES2-CreERT2;Ai82;Ai140_373368-18455	18455	TH_core		0	0	0	0	0	0	29.354	0	0	0	6742.9	48606	2936.18	0	0	0	0	0	0	0	0	0	0	0	0	0	0	0	0	0	0	0	0	0	0	0	0	0	0
18455_00159	7002.85	4581	4501.67	VPM	VPM	unknown	Tnnt1-IRES2-CreERT2;Ai82;Ai140_373368-18455	18455	TH_core		0	29.9978	0	0	0	0	26247.2	0	0	0	17557.1	893.609	697.762	0	0	0	0	0	0	0	0	0	0	0	0	0	0	0	0	0	0	0	0	0	0	0	0	0	0
18455_00163	6646.42	3877.2	5102.05	MD	MD	unknown	Tnnt1-IRES2-CreERT2;Ai82;Ai140_373368-18455	18455	TH_core	posterior MD	0	0	0	0	0	0	0	0	0	0	0	0	0	0	0	0	0	0	0	0	0	0	0	0	0	0	0	249.752	0	58589.6	69.5973	818.801	866.823	0	5923.35	0	0	0	0
18455_00164	5958.58	4351	5291.2	PT	IAD	unknown	Tnnt1-IRES2-CreERT2;Ai82;Ai140_373368-18455	18455	TH_matrix		49.9619	0	0	0	0	0	0	0	0	0	0	0	0	0	0	0	0	0	0	0	0	0	0	0	0	0	0	0	0	317.886	28676.5	9481.77	0	0	3223.06	0	0	0	0
18455_00165	6021.23	4299.98	5346.83	PT	MD	unknown	Tnnt1-IRES2-CreERT2;Ai82;Ai140_373368-18455	18455	TH_matrix	anterior MD	2326.02	0	0	0	0	0	0	0	0	0	0	0	0	0	0	0	0	0	0	0	0	0	0	0	0	0	0	1089.34	279.746	4445.43	1927.7	0	1065.68	0	2323.07	0	0	0	0
18455_00166	6220.3	4578.25	5123.02	AM	AM	unknown	Tnnt1-IRES2-CreERT2;Ai82;Ai140_373368-18455	18455	TH_core		0	0	0	0	0	0	0	0	0	0	0	0	0	0	0	0	0	0	0	0	0	0	0	0	0	0	4459.89	986.177	277.123	0	1933.59	60130.8	0	0	0	0	0	0	0
18455_00167	6748.58	4472.6	4131.38	VPM	VPM	unknown	Tnnt1-IRES2-CreERT2;Ai82;Ai140_373368-18455	18455	TH_core		0	12947.3	0	0	0	0	20957.9	0	0	0	0	0	0	0	0	0	0	0	0	0	0	0	0	0	0	0	0	0	0	0	0	0	0	0	0	0	0	0	0
18455_00172	5100.3	3976.4	4040.6	CP	CP	unknown	Tnnt1-IRES2-CreERT2;Ai82;Ai140_373368-18455	18455	CP_GPe		0	0	0	0	0	0	0	0	0	0	0	0	0	0	0	0	0	0	0	0	0	0	0	0	0	0	0	0	0	0	0	0	0	0	0	0	0	0	0
18455_00180	4386.9	4118.52	3176.12	CP	CP	unknown	Tnnt1-IRES2-CreERT2;Ai82;Ai140_373368-18455	18455	CP_SNr		0	0	0	0	0	0	0	0	0	0	0	0	0	0	0	0	0	0	0	0	0	0	0	0	0	0	0	0	0	0	0	0	0	0	0	0	0	0	0
18455_00181	4337.15	4299.73	3291.55	CP	CP	unknown	Tnnt1-IRES2-CreERT2;Ai82;Ai140_373368-18455	18455	CP_SNr		0	0	0	0	0	0	0	0	0	0	0	0	0	0	0	0	0	0	0	0	0	0	0	0	0	0	0	0	0	0	0	0	0	0	0	0	0	0	0
18455_00182	5236.5	4148	2994	CP	CP	unknown	Tnnt1-IRES2-CreERT2;Ai82;Ai140_373368-18455	18455	CP_SNr		0	0	0	0	0	0	0	0	0	0	0	0	0	0	0	0	0	0	0	0	0	0	0	0	0	0	0	0	0	0	0	0	0	0	0	0	0	0	0
18455_00199	6637.52	4041.57	4176.12	PO	VPM	unknown	Tnnt1-IRES2-CreERT2;Ai82;Ai140_373368-18455	18455	TH_core	large arbor, single	0	0	0	5463.06	0	0	43257.3	0	0	0	18610.1	0	9.99825	0	0	0	0	0	0	0	0	0	0	0	0	0	0	0	0	0	0	0	0	0	0	0	0	0	0
18455_00200	6627.2	4077.77	3763.55	VPM	VPM	unknown	Tnnt1-IRES2-CreERT2;Ai82;Ai140_373368-18455	18455	TH_core		0	0	0	672.59	0	0	21771.4	0	0	0	0	0	0	0	0	0	0	0	0	0	0	0	0	0	0	0	0	0	0	0	0	0	0	0	0	0	0	0	0
18455_00201	6693.83	4032.8	3792.02	VPM	VPM	unknown	Tnnt1-IRES2-CreERT2;Ai82;Ai140_373368-18455	18455	TH_core		0	0	0	1387.07	0	0	22349.8	0	0	436.085	0	0	0	0	0	0	0	0	0	0	0	0	0	0	0	0	0	0	0	0	0	0	0	0	0	0	0	0	0
18455_00202	6609.52	3823.52	3748.35	VPL	VPM	unknown	Tnnt1-IRES2-CreERT2;Ai82;Ai140_373368-18455	18455	TH_core		0	0	0	11275.6	0	0	2007.05	3381.8	0	34684.2	0	0	0	0	0	0	0	0	0	0	0	0	0	0	0	0	0	0	0	0	0	0	0	0	0	0	0	0	0
18455_00203	6688.85	3881.25	3712.57	VPM	VPM	unknown	Tnnt1-IRES2-CreERT2;Ai82;Ai140_373368-18455	18455	TH_core		0	0	0	25089.4	464.243	0	1828.26	0	0	2746.34	0	0	0	0	0	0	0	0	0	0	0	0	0	0	0	0	0	0	0	0	0	0	0	0	0	0	0	0	0
18455_00204	6815.9	3714.75	3436.88	fiber tracts	VPM	unknown	Tnnt1-IRES2-CreERT2;Ai82;Ai140_373368-18455	18455	TH_core		0	0	0	0	16182.3	0	0	0	0	0	0	0	0	0	0	0	0	0	0	0	0	0	0	0	0	0	0	0	0	0	0	0	0	0	0	0	0	0	0
18455_00205	6615.62	3770.15	3492.7	fiber tracts	VPL	unknown	Tnnt1-IRES2-CreERT2;Ai82;Ai140_373368-18455	18455	TH_core		0	0	0	0	3443	0	0	3334.26	399.806	10580	1552.5	0	0	19.9912	0	0	0	0	0	0	0	0	0	0	0	0	0	0	0	0	0	0	0	0	0	0	0	0	9.99567
18455_00206	6804.27	4004.1	3457.23	VPM	VPL	unknown	Tnnt1-IRES2-CreERT2;Ai82;Ai140_373368-18455	18455	TH_core		0	0	0	0	6852.86	0	0	1880.38	0	13580.4	418.602	0	0	0	0	0	0	0	0	0	0	0	0	0	0	0	0	0	0	0	0	0	0	0	0	0	0	0	0
18455_00207	6675.2	4153.48	3818.43	VPM	VPM	unknown	Tnnt1-IRES2-CreERT2;Ai82;Ai140_373368-18455	18455	TH_core		0	0	0	477.344	0	0	25310.8	0	0	0	219.345	0	0	0	0	0	0	0	0	0	0	0	0	0	0	0	0	0	0	0	0	0	0	0	0	0	0	0	0
18455_00208	6608.8	4273.08	3782.6	VPM	VPM	unknown	Tnnt1-IRES2-CreERT2;Ai82;Ai140_373368-18455	18455	TH_core		0	288.929	0	729.066	169.241	0	31067.2	842.842	0	299.404	0	0	0	0	0	0	0	0	0	0	0	0	0	0	0	0	0	0	0	0	0	0	0	0	0	0	0	0	0
18455_00209	6604.98	4386.27	3942.35	VPM	VPM	unknown	Tnnt1-IRES2-CreERT2;Ai82;Ai140_373368-18455	18455	TH_core		0	6749.85	0	0	0	0	14255.4	0	0	0	0	0	0	0	0	0	0	0	0	0	0	0	0	0	0	0	0	0	0	0	0	0	0	0	0	0	0	0	0
18455_00210	6668.42	4577.2	3911.1	VPL	VPL	unknown	Tnnt1-IRES2-CreERT2;Ai82;Ai140_373368-18455	18455	TH_core		0	18868.8	0	0	0	0	11849.2	0	0	0	0	0	0	0	0	0	0	0	0	0	0	0	0	0	0	0	0	0	0	0	0	0	0	0	0	0	0	0	0
18455_00220	5571.98	5236.25	2664.93	CP	CP	unknown	Tnnt1-IRES2-CreERT2;Ai82;Ai140_373368-18455	18455	CP_others		0	0	0	0	0	0	0	0	0	0	0	0	0	0	0	0	0	0	0	0	0	0	0	0	0	0	0	0	0	0	0	0	0	0	0	0	0	0	0
18455_00224	5333.25	4163.58	2434.2	CP	CP	unknown	Tnnt1-IRES2-CreERT2;Ai82;Ai140_373368-18455	18455	CP_GPe		0	0	0	0	0	0	0	0	0	0	0	0	0	0	0	0	0	0	0	0	0	0	0	0	0	0	0	0	0	0	0	0	0	0	0	0	0	0	0
18455_00240	5728.42	3786.55	2781.77	CP	CP	unknown	Tnnt1-IRES2-CreERT2;Ai82;Ai140_373368-18455	18455	CP_SNr		0	0	0	0	0	0	0	0	0	0	0	0	0	0	0	0	0	0	0	0	0	0	0	0	0	0	0	0	0	0	0	0	0	0	0	0	0	0	0
18455_00252	7024.95	3669.75	3830.8	VPM	VPM	unknown	Tnnt1-IRES2-CreERT2;Ai82;Ai140_373368-18455	18455	TH_core		0	0	0	18244	1311.63	0	0	0	0	0	576.328	0	0	0	0	0	0	0	0	0	0	0	0	0	0	0	0	0	0	0	0	0	0	0	0	0	0	0	0
18455_00253	7110.45	3721.15	3835.02	VPM	VPM	unknown	Tnnt1-IRES2-CreERT2;Ai82;Ai140_373368-18455	18455	TH_core		0	0	0	31258.8	0	0	229.139	0	0	0	2526.76	0	0	0	0	0	0	0	0	0	0	0	0	0	0	0	0	0	0	0	0	0	0	0	0	0	0	0	0
18455_00254	6933.17	3641.82	3707.75	VPM	VPM	unknown	Tnnt1-IRES2-CreERT2;Ai82;Ai140_373368-18455	18455	TH_core		0	0	0	4978.17	22165.8	0	0	0	0	0	0	0	0	0	0	0	0	0	0	0	0	0	0	0	0	0	0	0	0	0	0	0	0	0	0	0	0	0	0
18455_00255	7053.23	3569.25	3721.38	VPM	VPM	unknown	Tnnt1-IRES2-CreERT2;Ai82;Ai140_373368-18455	18455	TH_core		0	0	0	4660.66	19318.5	0	0	0	0	0	0	0	0	0	0	0	0	0	0	0	0	0	0	0	0	0	0	0	0	0	0	0	0	0	0	0	0	0	0
18455_00256	7436.75	3979.1	3801.38	VPM	VPM	unknown	Tnnt1-IRES2-CreERT2;Ai82;Ai140_373368-18455	18455	TH_core		0	0	0	0	0	0	0	0	0	0	29384.8	0	329.058	0	0	0	0	0	0	0	0	0	0	0	0	0	0	0	0	0	0	0	0	0	0	0	0	0	0
18455_00257	7663.1	3921.55	3735.95	VPM	VPM	unknown	Tnnt1-IRES2-CreERT2;Ai82;Ai140_373368-18455	18455	TH_core		0	0	0	0	0	0	0	0	0	0	29686.2	0	1290.25	0	0	0	0	0	0	0	0	0	0	0	0	0	0	0	0	0	0	0	0	0	0	0	0	0	0
18455_00258	7013.2	3719	3455.7	VPM	VPM	unknown	Tnnt1-IRES2-CreERT2;Ai82;Ai140_373368-18455	18455	TH_core		0	0	0	0	18998.2	0	0	0	0	0	477.831	0	0	0	0	0	0	0	0	0	0	0	0	0	0	0	0	0	0	0	0	0	0	0	0	0	0	0	0
18455_00259	7092.12	3666.68	3423.73	VPM	VPM	unknown	Tnnt1-IRES2-CreERT2;Ai82;Ai140_373368-18455	18455	TH_core		0	0	0	0	19790.6	0	0	0	0	0	1907.24	0	0	0	0	0	0	0	0	0	0	0	0	0	0	0	0	0	0	0	0	0	0	0	0	0	0	0	0
18455_00260	7202.17	3675.23	3364.62	fiber tracts	VPM	unknown	Tnnt1-IRES2-CreERT2;Ai82;Ai140_373368-18455	18455	TH_core		0	0	0	0	17284.1	0	0	0	0	0	628.709	0	0	179.623	0	0	0	0	0	0	0	0	0	0	0	0	0	0	0	0	0	0	0	0	0	0	0	0	0
18455_00261	7162.92	3773.02	3393.77	VPM	VPM	unknown	Tnnt1-IRES2-CreERT2;Ai82;Ai140_373368-18455	18455	TH_core		0	0	0	0	18747	0	0	0	0	0	2764.77	0	0	1095.58	0	0	331.276	0	0	0	0	0	0	0	0	0	0	0	0	0	0	0	0	0	0	0	0	0	0
18455_00262	6913.33	3939.57	3340.75	VPM	VPL	unknown	Tnnt1-IRES2-CreERT2;Ai82;Ai140_373368-18455	18455	TH_core		0	0	0	0	4795.46	0	0	575.975	631.01	10324.3	385.382	0	0	0	0	0	0	0	0	0	314.775	0	0	0	0	0	0	0	0	0	0	0	0	0	0	0	0	0	1046.81
18455_00263	6909.55	4143.92	4031.25	VPM	VPM	unknown	Tnnt1-IRES2-CreERT2;Ai82;Ai140_373368-18455	18455	TH_core		0	0	0	0	0	0	29413.5	0	0	0	1227.66	0	0	0	0	0	0	0	0	0	0	0	0	0	0	0	0	0	0	0	0	0	0	0	0	0	0	0	0
18455_00264	6897.27	4637.15	3920.35	VPM	VPM	unknown	Tnnt1-IRES2-CreERT2;Ai82;Ai140_373368-18455	18455	TH_core		0	17465.9	0	543.219	0	0	16584.7	1560.94	0	0	0	0	0	0	0	0	0	0	0	0	0	0	0	0	0	0	0	0	0	0	0	0	0	0	0	0	0	0	0
18455_3718_x10944_y12140	5113.88	3612.95	2962.38	CP	CP	unknown	Tnnt1-IRES2-CreERT2;Ai82;Ai140_373368-18455	18455	CP_SNr		0	0	0	0	0	0	0	0	0	0	0	0	0	0	0	0	0	0	0	0	0	0	0	0	0	0	0	0	0	0	0	0	0	0	0	0	0	0	0
18455_4619_x10185_y12182	6044.33	3728.43	2870.88	CP	CP	unknown	Tnnt1-IRES2-CreERT2;Ai82;Ai140_373368-18455	18455	CP_GPe		0	0	0	0	0	0	0	0	0	0	0	0	0	0	0	0	0	0	0	0	0	0	0	0	0	0	0	0	0	0	0	0	0	0	0	0	0	0	0
18455_4709_x21225_y13716	5914.48	4357.9	5187.62	IAD	IAD	unknown	Tnnt1-IRES2-CreERT2;Ai82;Ai140_373368-18455	18455	TH_matrix		39.8929	0	0	0	0	0	0	0	0	0	0	0	0	0	0	0	0	0	0	0	0	0	0	0	0	0	0	19.8961	0	608.922	27805.2	8842.72	0	0	3128.03	0	0	0	0
18455_4844_x20256_y14088	6042.33	4539.3	5539.85	PT	X	unknown	Tnnt1-IRES2-CreERT2;Ai82;Ai140_373368-18455	18455			0	0	0	0	0	0	0	0	0	0	0	0	0	0	0	0	0	0	0	0	0	0	0	0	0	0	1329.24	1069.14	927.25	6722.29	16828.4	561.603	1894.27	0	15190.2	0	0	0	0
18455_4982_x21552_y14337	6221.02	4575.62	5123.15	AM	AM	unknown	Tnnt1-IRES2-CreERT2;Ai82;Ai140_373368-18455	18455	TH_core		0	0	0	0	0	0	0	0	0	0	0	0	0	0	0	0	0	0	0	0	0	0	0	0	0	0	4478.58	976.844	287.901	0	1908.85	60001.9	0	0	0	0	0	0	0
18455_5196_x19752_y14652	6513.95	4832.65	5672.83	RH	RH	unknown	Tnnt1-IRES2-CreERT2;Ai82;Ai140_373368-18455	18455	TH_matrix		0	0	0	0	0	0	0	0	0	0	0	0	0	0	0	0	0	0	0	0	0	0	0	0	0	0	0	0	0	0	0	0	0	0	0	0	0	0	0
18455_5246_x26804_y12456	6613.5	3824.52	3748	VPL	VPM	unknown	Tnnt1-IRES2-CreERT2;Ai82;Ai140_373368-18455	18455	TH_core		0	0	0	10005.9	0	0	2218.75	2932.25	0	34030.5	0	0	0	0	0	0	0	0	0	0	0	0	0	0	0	0	0	0	0	0	0	0	0	0	0	0	0	0	0
18455_5250_x19362_y14728	6614.25	4910.95	5596.92	RH	SMT	unknown	Tnnt1-IRES2-CreERT2;Ai82;Ai140_373368-18455	18455	TH_core	large arbor	0	0	0	0	0	0	0	0	0	0	0	0	0	0	0	0	0	0	0	0	0	0	0	0	0	0	0	0	0	56922.5	129.803	10054.5	69.2164	0	10562.4	0	0	0	0
18455_5252_x26762_y12479	6610.12	3823.82	3748.12	VPL	VPM	unknown	Tnnt1-IRES2-CreERT2;Ai82;Ai140_373368-18455	18455	TH_core		0	0	0	12167.4	0	0	2239.37	3353.79	0	37381	0	0	0	0	0	0	0	0	0	0	0	0	0	0	0	0	0	0	0	0	0	0	0	0	0	0	0	0	0
18455_5253_x25617_y13881	6606.88	4387.67	3942.6	VPM	VPM	unknown	Tnnt1-IRES2-CreERT2;Ai82;Ai140_373368-18455	18455	TH_core		0	7081.59	0	0	0	0	13536.6	0	0	0	0	0	0	0	0	0	0	0	0	0	0	0	0	0	0	0	0	0	0	0	0	0	0	0	0	0	0	0	0
18455_5316_x26308_y13288	6685.98	4155.6	3818.5	VPM	VPM	unknown	Tnnt1-IRES2-CreERT2;Ai82;Ai140_373368-18455	18455	TH_core		0	0	0	448.487	0	0	25278.1	0	0	0	209.453	0	0	0	0	0	0	0	0	0	0	0	0	0	0	0	0	0	0	0	0	0	0	0	0	0	0	0	0
18455_5386_x25400_y12840	6639.5	4043.48	4176.5	PO	VPM	unknown	Tnnt1-IRES2-CreERT2;Ai82;Ai140_373368-18455	18455	TH_core		0	0	0	5549.49	0	0	43240.1	0	0	0	18555.7	0	30.0008	0	0	0	0	0	0	0	0	0	0	0	0	0	0	0	0	0	0	0	0	0	0	0	0	0	0
18455_5404_x24949_y14106	6748	4474.83	4129.58	VPM	VPM	unknown	Tnnt1-IRES2-CreERT2;Ai82;Ai140_373368-18455	18455	TH_core		0	15430.7	0	0	0	0	32119.8	0	0	0	0	0	0	0	0	0	0	0	0	0	0	0	0	0	0	0	0	0	0	0	0	0	0	0	0	0	0	0	0
18455_5472_x13482_y11733	6836.55	3599.4	3768.35	VPL	VPM	unknown	Tnnt1-IRES2-CreERT2;Ai82;Ai140_373368-18455	18455	TH_core		0	0	0	288.101	26965.6	0	0	0	0	39.9954	0	0	0	0	0	0	0	0	0	0	0	0	0	0	0	0	0	0	0	0	0	0	0	0	0	0	0	0	0
18455_5474_x14981_y13279	6821.55	4238.75	4225.98	VPM	VPM	unknown	Tnnt1-IRES2-CreERT2;Ai82;Ai140_373368-18455	18455	TH_core		0	0	0	0	0	0	32634.8	0	0	0	49.6012	0	0	0	0	0	0	0	0	0	0	0	0	0	0	0	0	0	0	0	0	0	0	0	0	0	0	0	0
18455_5507_x14812_y14221	6850.88	4792.83	4109.23	VPM	VPM	unknown	Tnnt1-IRES2-CreERT2;Ai82;Ai140_373368-18455	18455	TH_core		0	337.813	0	376.71	0	0	28530.4	0	0	0	209.409	0	0	0	0	0	0	0	0	0	0	0	0	0	0	0	0	0	0	0	0	0	0	0	0	0	0	0	0
18455_5517_x15391_y12702	6851.67	3849.12	4427.65	PO	PO	unknown	Tnnt1-IRES2-CreERT2;Ai82;Ai140_373368-18455	18455	TH_matrix		0	35939.6	0	2091.13	0	0	17603.9	1190.41	0	0	0	0	0	0	0	0	0	0	0	0	0	0	0	0	0	0	0	0	0	0	0	0	0	0	0	0	0	0	0
18455_5542_x25478_y13256	6910.95	4147.83	4031.62	VPM	VPM	unknown	Tnnt1-IRES2-CreERT2;Ai82;Ai140_373368-18455	18455	TH_core		0	0	0	0	0	0	29751	0	0	0	1220.25	0	0	0	0	0	0	0	0	0	0	0	0	0	0	0	0	0	0	0	0	0	0	0	0	0	0	0	0
18455_5600_x15840_y13940	7007.83	4583.98	4503.42	VPM	VPM	unknown	Tnnt1-IRES2-CreERT2;Ai82;Ai140_373368-18455	18455	TH_core		0	30.0003	0	0	0	0	26041.6	0	0	0	16959.4	873.748	886.988	0	0	0	0	0	0	0	0	0	0	0	0	0	0	0	0	0	0	0	0	0	0	0	0	0	0
18455_5632_x14519_y14028	6973.9	4624.75	4056.23	VPM	VPM	unknown	Tnnt1-IRES2-CreERT2;Ai82;Ai140_373368-18455	18455	TH_core		0	302.723	0	698.224	0	0	39451.2	0	0	0	5693.13	0	0	0	0	0	0	0	0	0	0	0	0	0	0	0	0	0	0	0	0	0	0	0	0	0	0	0	0
18455_5693_x15213_y13902	7075.65	4545.9	4312.17	VPM	VPM	unknown	Tnnt1-IRES2-CreERT2;Ai82;Ai140_373368-18455	18455	TH_core		0	0	0	0	0	0	23076.1	0	0	0	8000.13	0	0	0	0	0	0	0	0	0	0	0	0	0	0	0	0	0	0	0	0	0	0	0	0	0	0	0	0
18455_5730_x15780_y13638	7140	4392.12	4541.15	PO	VPLpc		Tnnt1-IRES2-CreERT2;Ai82;Ai140_373368-18455	18455	TH_core		0	0	0	0	0	0	28479	0	0	0	7524.1	1259.37	0	0	0	0	0	0	0	0	0	0	0	0	0	0	0	0	0	0	0	0	0	0	0	0	0	0	0
18455_5898_x14920_y13352	7291.33	4249.38	4289.35	VPM	VPLpc		Tnnt1-IRES2-CreERT2;Ai82;Ai140_373368-18455	18455	TH_core		0	0	0	0	0	0	0	0	0	0	42937.7	248.668	6135.24	0	0	0	0	0	0	0	0	0	0	0	0	0	0	0	0	0	0	0	0	0	0	0	0	0	0
18455_6001_x15897_y13277	7438.65	4244.08	4604.1	PO	VPLpc		Tnnt1-IRES2-CreERT2;Ai82;Ai140_373368-18455	18455	TH_core		0	0	0	0	0	0	18.9621	0	0	0	5717.38	47227.9	3024.5	0	0	0	0	0	0	0	0	0	0	0	0	0	0	0	0	0	0	0	0	0	0	0	0	0	0
18457_00001	5063.33	3222.9	3565.77	CP	CP	unknown	Vipr2-IRES2-Cre-neo;Ai166_381484-18457	18457	CP_GPe		0	0	0	0	0	0	0	0	0	0	0	0	0	0	0	0	0	0	0	0	0	0	0	0	0	0	0	0	0	0	0	0	0	0	0	0	0	0	0
18457_00002	5705.73	2992.35	3713.95	CP	CP	unknown	Vipr2-IRES2-Cre-neo;Ai166_381484-18457	18457	CP_GPe		0	0	0	0	0	0	0	0	0	0	0	0	0	0	0	0	0	0	0	0	0	0	0	0	0	0	0	0	0	0	0	0	0	0	0	0	0	0	0
18457_00003	5763.42	3103.2	3794.55	CP	CP	unknown	Vipr2-IRES2-Cre-neo;Ai166_381484-18457	18457	CP_GPe		0	0	0	0	0	0	0	0	0	0	0	0	0	0	0	0	0	0	0	0	0	0	0	0	0	0	0	0	0	0	0	0	0	0	0	0	0	0	0
18457_00004	3841.43	3971.9	3869.88	CP	CP	unknown	Vipr2-IRES2-Cre-neo;Ai166_381484-18457	18457	CP_GPe		0	0	0	0	0	0	0	0	0	0	0	0	0	0	0	0	0	0	0	0	0	0	0	0	0	0	0	0	0	0	0	0	0	0	0	0	0	0	0
18457_00005	4004.8	4231.5	3869.23	CP	CP	unknown	Vipr2-IRES2-Cre-neo;Ai166_381484-18457	18457	CP_GPe		0	0	0	0	0	0	0	0	0	0	0	0	0	0	0	0	0	0	0	0	0	0	0	0	0	0	0	0	0	0	0	0	0	0	0	0	0	0	0
18457_00006	5289.02	4078.62	3864.02	CP	CP	unknown	Vipr2-IRES2-Cre-neo;Ai166_381484-18457	18457	CP_GPe		0	0	0	0	0	0	0	0	0	0	0	0	0	0	0	0	0	0	0	0	0	0	0	0	0	0	0	0	0	0	0	0	0	0	0	0	0	0	0
18457_00007	4759.35	3835.93	4098.75	CP	CP	unknown	Vipr2-IRES2-Cre-neo;Ai166_381484-18457	18457	CP_GPe		0	0	0	0	0	0	0	0	0	0	0	0	0	0	0	0	0	0	0	0	0	0	0	0	0	0	0	0	0	0	0	0	0	0	0	0	0	0	0
18457_00008	4710.88	4109.8	3957.4	CP	CP	unknown	Vipr2-IRES2-Cre-neo;Ai166_381484-18457	18457	CP_SNr		0	0	0	0	0	0	0	0	0	0	0	0	0	0	0	0	0	0	0	0	0	0	0	0	0	0	0	0	0	0	0	0	0	0	0	0	0	0	0
18457_00009	7042.9	3462.02	3456	RT	LD	unknown	Vipr2-IRES2-Cre-neo;Ai166_381484-18457	18457			0	0	0	0	0	0	0	0	0	0	0	0	0	0	0	0	0	0	0	97.7871	17368.1	3784.32	7738.73	0	177.609	0	0	0	0	0	0	0	0	0	0	12773	7509.45	0	0
18457_00010	7062.7	3955.88	3330.52	VPM	VPL	unknown	Vipr2-IRES2-Cre-neo;Ai166_381484-18457	18457	TH_core		0	0	0	0	12370	0	0	5555.17	0	2681.28	0	0	0	0	0	0	0	0	0	0	0	0	0	0	0	0	0	0	0	0	0	0	0	0	0	0	0	0	0
18457_00012	7118.98	4125.75	3218.9	fiber tracts	VPL	unknown	Vipr2-IRES2-Cre-neo;Ai166_381484-18457	18457	TH_core		0	0	0	3920.41	17268.1	0	0	0	0	0	189.226	0	0	0	0	0	0	0	0	0	0	0	0	0	0	0	0	0	0	0	0	0	0	0	0	0	0	0	0
18457_00013	6986.2	4031.27	3346.35	VPL	VPM	unknown	Vipr2-IRES2-Cre-neo;Ai166_381484-18457	18457	TH_core		0	0	0	13337.3	9991.5	0	0	0	0	0	198.755	0	0	0	0	0	0	0	0	0	0	0	0	0	0	0	0	0	0	0	0	0	0	0	0	0	0	0	0
18457_00014	4392.9	3828.1	4406.58	CP	CP	unknown	Vipr2-IRES2-Cre-neo;Ai166_381484-18457	18457	CP_SNr		0	0	0	0	0	0	0	0	0	0	0	0	0	0	0	0	0	0	0	0	0	0	0	0	0	0	0	0	0	0	0	0	0	0	0	0	0	0	0
18457_00015	4189.1	4126.85	4340.88	CP	CP	unknown	Vipr2-IRES2-Cre-neo;Ai166_381484-18457	18457	CP_GPe		0	0	0	0	0	0	0	0	0	0	0	0	0	0	0	0	0	0	0	0	0	0	0	0	0	0	0	0	0	0	0	0	0	0	0	0	0	0	0
18457_00017	7559.25	3884.77	3120.1	LGv	VPM	unknown	Vipr2-IRES2-Cre-neo;Ai166_381484-18457	18457	TH_core		0	0	0	0	1413.58	0	0	0	0	0	9847.46	0	0	139.802	0	0	399.085	0	0	0	0	0	0	0	0	0	0	0	0	0	0	0	0	0	0	0	0	0	0
18457_00018	7411.42	3783.55	3308.9	unknown	VPM	unknown	Vipr2-IRES2-Cre-neo;Ai166_381484-18457	18457	TH_core		0	0	0	0	12610.9	0	0	0	0	0	5548.13	0	0	209.565	159.583	0	558.1	0	0	0	0	0	0	0	0	0	0	0	0	0	0	0	0	0	0	0	0	0	0
18457_00019	7698.48	3702.27	3318.5	LGd	VPM	unknown	Vipr2-IRES2-Cre-neo;Ai166_381484-18457	18457	TH_core		0	0	0	0	732.964	0	0	0	0	0	5096.01	0	0	5343.27	0	0	0	0	0	0	0	0	0	0	0	0	0	0	0	0	0	0	0	0	0	0	0	0	0
18457_00023	7538.35	3977.95	3318.42	fiber tracts	VPM	unknown	Vipr2-IRES2-Cre-neo;Ai166_381484-18457	18457	TH_core		0	0	0	0	6317.95	0	0	0	0	0	11734.9	0	0	438.323	0	0	658.312	0	0	0	0	0	0	0	0	0	0	0	0	0	0	0	0	0	0	0	0	0	0
18457_00024	7617.98	4011.95	3156.5	LGv	VPL	unknown	Vipr2-IRES2-Cre-neo;Ai166_381484-18457	18457	TH_core		0	0	0	0	2306.19	0	0	0	0	0	14138.3	0	0	975.941	0	0	627.366	0	0	0	0	0	0	0	0	0	0	0	0	0	0	0	0	0	0	0	0	0	0
18457_00025	7626.23	3898.57	3236.7	IGL	VPM	unknown	Vipr2-IRES2-Cre-neo;Ai166_381484-18457	18457	TH_core		0	0	0	0	0	0	0	0	0	0	12069.7	0	0	1720.15	0	0	619.478	0	0	0	0	0	0	0	0	0	0	0	0	0	0	0	0	0	0	0	0	0	0
18457_00026	7241.4	3762.57	3430.05	VPM	VPM	unknown	Vipr2-IRES2-Cre-neo;Ai166_381484-18457	18457	TH_core		0	0	0	0	17475.3	0	0	0	0	0	3987.42	0	0	0	0	0	0	0	0	0	0	0	0	0	0	0	0	0	0	0	0	0	0	0	0	0	0	0	0
18457_00027	7416.45	3769.32	3426.5	VPM	VPM	unknown	Vipr2-IRES2-Cre-neo;Ai166_381484-18457	18457	TH_core		0	0	0	0	4126.43	0	0	0	0	0	16250	0	0	0	0	0	0	0	0	0	0	0	0	0	0	0	0	0	0	0	0	0	0	0	0	0	0	0	0
18457_00028	7474.75	3910.38	3764.38	VPM	VPM	unknown	Vipr2-IRES2-Cre-neo;Ai166_381484-18457	18457	TH_core		0	0	0	2339	0	0	0	0	0	0	34442.1	0	0	0	0	0	0	0	0	0	0	0	0	0	0	0	0	0	0	0	0	0	0	0	0	0	0	0	0
18457_00029	7148.52	4054.4	3869.75	VPM	VPM	unknown	Vipr2-IRES2-Cre-neo;Ai166_381484-18457	18457	TH_core		0	0	0	337.762	0	0	289.018	0	0	0	14868.2	0	0	0	0	0	0	0	0	0	0	0	0	0	0	0	0	0	0	0	0	0	0	0	0	0	0	0	0
18457_00030	5342.67	3266.88	4455.9	CP	CP	unknown	Vipr2-IRES2-Cre-neo;Ai166_381484-18457	18457	CP_GPe		0	0	0	0	0	0	0	0	0	0	0	0	0	0	0	0	0	0	0	0	0	0	0	0	0	0	0	0	0	0	0	0	0	0	0	0	0	0	0
18457_00031	5242.25	3291.77	4650.08	CP	CP	unknown	Vipr2-IRES2-Cre-neo;Ai166_381484-18457	18457	CP_GPe		0	0	0	0	0	0	0	0	0	0	0	0	0	0	0	0	0	0	0	0	0	0	0	0	0	0	0	0	0	0	0	0	0	0	0	0	0	0	0
18457_00032	4941.52	3254.2	4409.55	CP	CP	unknown	Vipr2-IRES2-Cre-neo;Ai166_381484-18457	18457	CP_GPe		0	0	0	0	0	0	0	0	0	0	0	0	0	0	0	0	0	0	0	0	0	0	0	0	0	0	0	0	0	0	0	0	0	0	0	0	0	0	0
18457_00033	4839.17	3228.45	4179.52	CP	CP	unknown	Vipr2-IRES2-Cre-neo;Ai166_381484-18457	18457	CP_GPe		0	0	0	0	0	0	0	0	0	0	0	0	0	0	0	0	0	0	0	0	0	0	0	0	0	0	0	0	0	0	0	0	0	0	0	0	0	0	0
18457_00034	4578.3	3624.48	3928.7	CP	CP	unknown	Vipr2-IRES2-Cre-neo;Ai166_381484-18457	18457	CP_SNr		0	0	0	0	0	0	0	0	0	0	0	0	0	0	0	0	0	0	0	0	0	0	0	0	0	0	0	0	0	0	0	0	0	0	0	0	0	0	0
18457_00035	3854.6	3940.43	4324.02	CP	CP	unknown	Vipr2-IRES2-Cre-neo;Ai166_381484-18457	18457	CP_GPe		0	0	0	0	0	0	0	0	0	0	0	0	0	0	0	0	0	0	0	0	0	0	0	0	0	0	0	0	0	0	0	0	0	0	0	0	0	0	0
18457_00036	4117.52	3755.75	4207.12	CP	CP	unknown	Vipr2-IRES2-Cre-neo;Ai166_381484-18457	18457	CP_GPe		0	0	0	0	0	0	0	0	0	0	0	0	0	0	0	0	0	0	0	0	0	0	0	0	0	0	0	0	0	0	0	0	0	0	0	0	0	0	0
18457_00037	4634.05	3908.48	4560.1	CP	CP	unknown	Vipr2-IRES2-Cre-neo;Ai166_381484-18457	18457	CP_GPe		0	0	0	0	0	0	0	0	0	0	0	0	0	0	0	0	0	0	0	0	0	0	0	0	0	0	0	0	0	0	0	0	0	0	0	0	0	0	0
18457_00038	5259.83	3880.02	4520.15	CP	CP	unknown	Vipr2-IRES2-Cre-neo;Ai166_381484-18457	18457	CP_others		0	0	0	0	0	0	0	0	0	0	0	0	0	0	0	0	0	0	0	0	0	0	0	0	0	0	0	0	0	0	0	0	0	0	0	0	0	0	0
18457_00039	4892.58	4150.75	4133.75	CP	CP	unknown	Vipr2-IRES2-Cre-neo;Ai166_381484-18457	18457	CP_GPe		0	0	0	0	0	0	0	0	0	0	0	0	0	0	0	0	0	0	0	0	0	0	0	0	0	0	0	0	0	0	0	0	0	0	0	0	0	0	0
18457_00040	4694.92	4061.23	4013.38	CP	CP	unknown	Vipr2-IRES2-Cre-neo;Ai166_381484-18457	18457	CP_SNr		0	0	0	0	0	0	0	0	0	0	0	0	0	0	0	0	0	0	0	0	0	0	0	0	0	0	0	0	0	0	0	0	0	0	0	0	0	0	0
18457_00041	5667.9	3240.45	4404.6	CP	CP	unknown	Vipr2-IRES2-Cre-neo;Ai166_381484-18457	18457	CP_GPe		0	0	0	0	0	0	0	0	0	0	0	0	0	0	0	0	0	0	0	0	0	0	0	0	0	0	0	0	0	0	0	0	0	0	0	0	0	0	0
18457_00043	5779.08	3345.9	4013.4	CP	CP	unknown	Vipr2-IRES2-Cre-neo;Ai166_381484-18457	18457	CP_GPe		0	0	0	0	0	0	0	0	0	0	0	0	0	0	0	0	0	0	0	0	0	0	0	0	0	0	0	0	0	0	0	0	0	0	0	0	0	0	0
18457_00044	5815.1	3409.02	4076.62	CP	CP	unknown	Vipr2-IRES2-Cre-neo;Ai166_381484-18457	18457	CP_GPe		0	0	0	0	0	0	0	0	0	0	0	0	0	0	0	0	0	0	0	0	0	0	0	0	0	0	0	0	0	0	0	0	0	0	0	0	0	0	0
18457_00045	7027.17	4038.6	4011.15	VPM	VPM	unknown	Vipr2-IRES2-Cre-neo;Ai166_381484-18457	18457	TH_core		0	0	0	25136.4	0	0	0	0	0	0	4557.44	0	0	0	0	0	0	0	0	0	0	0	0	0	0	0	0	0	0	0	0	0	0	0	0	0	0	0	0
18457_00046	6992.92	3975.32	3917.9	VPM	VPM	unknown	Vipr2-IRES2-Cre-neo;Ai166_381484-18457	18457	TH_core		0	0	0	3825.34	18641.6	0	0	0	0	0	0	0	0	0	0	0	0	0	0	0	0	0	0	0	0	0	0	0	0	0	0	0	0	0	0	0	0	0	0
18457_00047	6978.77	3987.3	3778.82	VPM	VPM	unknown	Vipr2-IRES2-Cre-neo;Ai166_381484-18457	18457	TH_core		0	0	0	39.1449	19622.7	0	0	0	0	95.4875	0	0	0	0	0	0	0	0	0	0	0	0	0	0	0	0	0	0	0	0	0	0	0	0	0	0	0	0	0
18457_00048	6930.77	4084.85	3542.77	VPM	VPM	unknown	Vipr2-IRES2-Cre-neo;Ai166_381484-18457	18457	TH_core		0	0	0	0	6383.03	0	0	129.054	59.3647	1538.58	0	0	0	0	0	0	0	0	0	0	0	0	0	0	0	0	0	0	0	0	0	0	0	0	0	0	0	0	0
18457_00049	7227.08	3829.77	4051.8	PO	VPM	unknown	Vipr2-IRES2-Cre-neo;Ai166_381484-18457	18457	TH_core		0	0	0	12787.3	5798.19	0	0	0	0	0	4863.16	0	0	0	0	0	0	0	0	0	0	0	0	0	0	0	0	0	0	0	0	0	0	0	0	0	0	0	0
18457_00051	7470.25	3996.1	3969.8	VPM	VPM	unknown	Vipr2-IRES2-Cre-neo;Ai166_381484-18457	18457	TH_core		0	0	0	0	0	0	0	0	0	0	19122.7	0	812.445	0	0	0	0	0	0	0	0	0	0	0	0	0	0	0	0	0	0	0	0	0	0	0	0	0	0
18457_00052	7119	4043.48	4084.07	VPM	VPM	unknown	Vipr2-IRES2-Cre-neo;Ai166_381484-18457	18457	TH_core		0	0	0	19291	0	0	0	0	0	0	1772.38	0	0	0	0	0	0	0	0	0	0	0	0	0	0	0	0	0	0	0	0	0	0	0	0	0	0	0	0
18457_00053	7096.98	4078.18	4113.65	VPM	VPM	unknown	Vipr2-IRES2-Cre-neo;Ai166_381484-18457	18457	TH_core		0	0	0	23247.3	0	0	248.737	0	0	0	3126.41	0	0	0	0	0	0	0	0	0	0	0	0	0	0	0	0	0	0	0	0	0	0	0	0	0	0	0	0
18457_00054	7419.2	4061.12	4097.12	VPM	VPM	unknown	Vipr2-IRES2-Cre-neo;Ai166_381484-18457	18457	TH_core		0	0	0	841.182	0	0	0	0	0	0	25491.4	0	0	0	0	0	0	0	0	0	0	0	0	0	0	0	0	0	0	0	0	0	0	0	0	0	0	0	0
18457_00055	7247.25	3774.48	3896.68	VPM	VPM	unknown	Vipr2-IRES2-Cre-neo;Ai166_381484-18457	18457	TH_core		0	0	0	0	15432.9	0	0	0	0	0	1536.56	0	0	0	0	0	0	0	0	0	0	0	0	0	0	0	0	0	0	0	0	0	0	0	0	0	0	0	0
18457_00056	7249.85	3837.77	3853.02	VPM	VPM	unknown	Vipr2-IRES2-Cre-neo;Ai166_381484-18457	18457	TH_core	small arbor, single	0	0	0	0	19054.6	0	0	0	0	0	1353.47	0	0	0	0	0	0	0	0	0	0	0	0	0	0	0	0	0	0	0	0	0	0	0	0	0	0	0	0
18457_00057	7310.92	3853.75	3888.55	VPM	VPM	unknown	Vipr2-IRES2-Cre-neo;Ai166_381484-18457	18457	TH_core		0	0	0	29.802	16434.8	0	0	0	0	0	4238.06	0	0	0	0	0	0	0	0	0	0	0	0	0	0	0	0	0	0	0	0	0	0	0	0	0	0	0	0
18457_00058	7218.27	3913.7	3732.3	VPM	VPM	unknown	Vipr2-IRES2-Cre-neo;Ai166_381484-18457	18457	TH_core		0	0	0	0	24544.1	0	0	0	0	0	9.99536	0	0	0	0	0	0	0	0	0	0	0	0	0	0	0	0	0	0	0	0	0	0	0	0	0	0	0	0
18457_00059	7387.58	3971.43	3571.77	VPM	VPM	unknown	Vipr2-IRES2-Cre-neo;Ai166_381484-18457	18457	TH_core		0	0	0	0	18815.2	0	0	0	0	0	117.326	0	0	0	0	0	0	0	0	0	0	0	0	0	0	0	0	0	0	0	0	0	0	0	0	0	0	0	0
18457_00061	7616.58	3843.57	3662.5	VPM	VPM	unknown	Vipr2-IRES2-Cre-neo;Ai166_381484-18457	18457	TH_core		0	0	0	0	176.279	0	0	0	0	0	21473.5	0	0	139.761	9.85241	0	0	0	0	0	0	0	0	0	0	0	0	0	0	0	0	0	0	0	0	0	0	0	0
18457_00062	7633.4	3938.73	3582.4	VPM	VPM	unknown	Vipr2-IRES2-Cre-neo;Ai166_381484-18457	18457	TH_core		0	0	0	0	567.935	0	0	0	0	0	21850.7	0	0	508.401	1182.89	0	0	0	0	0	0	0	0	0	0	0	0	0	0	0	0	0	0	0	0	0	0	0	0
18457_00063	7392.4	3910.32	3510.1	VPM	VPM	unknown	Vipr2-IRES2-Cre-neo;Ai166_381484-18457	18457	TH_core		0	0	0	0	19838.7	0	0	0	0	0	0	0	0	0	0	0	0	0	0	0	0	0	0	0	0	0	0	0	0	0	0	0	0	0	0	0	0	0	0
18457_00064	7184.58	3932.65	3921.1	VPM	VPM	unknown	Vipr2-IRES2-Cre-neo;Ai166_381484-18457	18457	TH_core	small arbor, single	0	0	0	5039.25	22844.3	0	0	0	0	0	0	0	0	0	0	0	0	0	0	0	0	0	0	0	0	0	0	0	0	0	0	0	0	0	0	0	0	0	0
18457_00065	7253.8	4073.77	3608.93	VPM	VPL	unknown	Vipr2-IRES2-Cre-neo;Ai166_381484-18457	18457	TH_core		0	0	0	0	9520.49	0	0	0	0	0	0	0	0	0	0	0	0	0	0	0	0	0	0	0	0	0	0	0	0	0	0	0	0	0	0	0	0	0	0
18457_00066	7361.92	4028.07	3636.1	VPM	VPM	unknown	Vipr2-IRES2-Cre-neo;Ai166_381484-18457	18457	TH_core		0	0	0	0	24038.8	0	0	0	0	0	0	0	0	0	0	0	0	0	0	0	0	0	0	0	0	0	0	0	0	0	0	0	0	0	0	0	0	0	0
18457_00068	7114.23	4126.77	3740.7	VPM	VPM	unknown	Vipr2-IRES2-Cre-neo;Ai166_381484-18457	18457	TH_core		0	0	0	0	21543.1	0	0	0	0	0	0	0	0	0	0	0	0	0	0	0	0	0	0	0	0	0	0	0	0	0	0	0	0	0	0	0	0	0	0
18457_00069	7706.45	4235.75	3573.05	unknown	VPL	unknown	Vipr2-IRES2-Cre-neo;Ai166_381484-18457	18457	TH_core		0	0	0	0	5273.83	0	0	0	812.744	0	836.864	0	0	17122	350.89	29.9722	846.94	0	0	0	0	0	0	0	0	0	0	0	0	0	0	0	0	0	0	0	0	0	13057.9
18457_00072	7235.45	4209.12	3591.65	VPM	VPL	unknown	Vipr2-IRES2-Cre-neo;Ai166_381484-18457	18457	TH_core		0	0	0	0	17093.8	0	0	0	0	0	800.415	0	0	1397.56	0	0	0	0	0	0	0	0	0	0	0	0	0	0	0	0	0	0	0	0	0	0	0	0	0
18457_00073	7511.35	4186.15	3547.35	VPL	VPL	unknown	Vipr2-IRES2-Cre-neo;Ai166_381484-18457	18457	TH_core		0	0	0	0	19215.8	0	0	0	0	0	199.192	0	0	3080.58	0	0	0	0	0	0	0	0	0	0	0	0	0	0	0	0	0	0	0	0	0	0	0	0	0
18457_00074	8192.22	4045.55	3433.48	MG	MG	unknown	Vipr2-IRES2-Cre-neo;Ai166_381484-18457	18457	TH_core	single target	0	0	0	0	0	0	0	0	0	0	0	0	0	0	17622.1	15293.5	971.903	0	0	0	0	0	0	0	0	0	0	0	0	0	0	0	0	0	0	0	0	0	0
18457_00075	8160.98	4210.58	3329.57	unknown	MG	unknown	Vipr2-IRES2-Cre-neo;Ai166_381484-18457	18457	TH_core		0	0	0	0	0	0	0	0	0	0	0	0	0	0	0	0	0	0	0	0	0	0	0	0	0	0	0	0	0	0	0	0	0	0	0	0	0	0	0
18457_00076	5534.8	5028.25	2022.6	CLA	CP	unknown	Vipr2-IRES2-Cre-neo;Ai166_381484-18457	18457	CP_SNr		0	0	0	0	0	0	0	0	0	0	0	0	0	0	0	0	0	0	0	0	0	0	0	0	0	0	0	0	0	0	0	0	0	635.45	0	0	0	0	0
18457_00077	5882.38	5177.38	2244.85	CP	CP	unknown	Vipr2-IRES2-Cre-neo;Ai166_381484-18457	18457	CP_others		0	0	0	0	0	0	0	0	0	0	0	0	0	0	0	0	0	0	0	0	0	0	0	0	0	0	0	0	0	0	0	0	0	0	0	0	0	0	0
18457_00078	5744.55	5386.88	2316.92	fiber tracts	CP	unknown	Vipr2-IRES2-Cre-neo;Ai166_381484-18457	18457	CP_others		0	0	0	0	0	0	0	0	0	0	0	0	0	0	0	0	0	0	0	0	0	0	0	0	0	0	0	0	0	0	0	0	0	0	0	0	0	0	0
18457_00079	5795	5525.35	2073.85	EPd	CP	unknown	Vipr2-IRES2-Cre-neo;Ai166_381484-18457	18457	CP_SNr		0	0	0	0	0	0	0	0	0	0	0	0	0	0	0	0	0	0	0	0	0	0	0	0	0	0	0	0	0	0	0	0	0	0	0	0	0	0	0
18457_00080	6540.58	5747.75	2224.08	fiber tracts	CP	unknown	Vipr2-IRES2-Cre-neo;Ai166_381484-18457	18457	CP_SNr		0	0	0	0	0	0	0	0	0	0	0	0	0	0	0	0	0	0	0	0	0	0	0	0	0	0	0	0	0	0	0	0	0	0	0	0	0	0	0
18457_00081	2659.62	4533.75	4090.52	AON	AON	unknown	Vipr2-IRES2-Cre-neo;Ai166_381484-18457	18457			0	0	0	0	0	0	0	0	0	0	0	0	0	0	0	0	0	0	0	0	0	0	0	0	0	0	0	0	0	0	0	0	0	0	0	0	0	0	0
18457_00082	4642.5	4652.88	3711.3	CP	CP	unknown	Vipr2-IRES2-Cre-neo;Ai166_381484-18457	18457	CP_SNr		0	0	0	0	0	0	0	0	0	0	0	0	0	0	0	0	0	0	0	0	0	0	0	0	0	0	0	0	0	0	0	0	0	0	0	0	0	0	0
18457_00083	6933.85	4154.75	3286.75	VPL	VPM	unknown	Vipr2-IRES2-Cre-neo;Ai166_381484-18457	18457	TH_core		0	0	0	368.699	25248.5	0	0	0	0	0	0	0	0	0	0	0	0	0	0	0	0	0	0	0	0	0	0	0	0	0	0	0	0	0	0	0	0	0	0
18457_00087	5567.65	4603.12	4079.42	GPe	CP	unknown	Vipr2-IRES2-Cre-neo;Ai166_381484-18457	18457	CP_SNr		0	0	0	0	0	0	0	0	0	0	0	0	0	0	0	0	0	0	0	0	0	0	0	0	0	0	0	0	0	0	0	0	0	0	0	0	0	0	0
18457_00088	6966.27	4100.8	3639.95	VPM	VPM	unknown	Vipr2-IRES2-Cre-neo;Ai166_381484-18457	18457	TH_core		0	0	0	23583.2	0	0	1772.34	0	0	78.3672	0	0	0	0	0	0	0	0	0	0	0	0	0	0	0	0	0	0	0	0	0	0	0	0	0	0	0	0	0
18457_00089	7139.6	4345.38	3332.83	VPL	VPL	unknown	Vipr2-IRES2-Cre-neo;Ai166_381484-18457	18457	TH_core		0	0	0	28083.5	1190.64	0	0	0	0	0	3140.89	0	0	0	0	0	0	0	0	0	0	0	0	0	0	0	0	0	0	0	0	0	0	0	0	0	0	0	0
18457_00090	7045.67	4333.42	3694.95	VPM	VPM	unknown	Vipr2-IRES2-Cre-neo;Ai166_381484-18457	18457	TH_core		0	0	0	888.136	0	0	9576.37	0	0	0	2877.68	0	0	0	0	0	0	0	0	0	0	0	0	0	0	0	0	0	0	0	0	0	0	0	0	0	0	0	0
18457_00091	6875.52	4242.55	3712.23	VPM	VPM	unknown	Vipr2-IRES2-Cre-neo;Ai166_381484-18457	18457	TH_core		0	0	0	1339.95	0	0	21245.2	0	0	0	0	0	0	0	0	0	0	0	0	0	0	0	0	0	0	0	0	0	0	0	0	0	0	0	0	0	0	0	0
18457_00095	6839.2	4526.67	3410.95	RT	VPM	unknown	Vipr2-IRES2-Cre-neo;Ai166_381484-18457	18457	TH_core		0	0	0	974.987	0	0	815.333	0	0	10915.6	0	0	0	0	0	0	0	0	0	0	0	0	0	0	0	0	0	0	0	0	0	0	0	0	0	0	0	0	0
18457_00096	7043.75	4392.75	3480.7	VPL	VPM	unknown	Vipr2-IRES2-Cre-neo;Ai166_381484-18457	18457	TH_core		0	0	0	8258.47	0	0	18788.4	0	0	0	1588.02	0	0	0	0	0	0	0	0	0	0	0	0	0	0	0	0	0	0	0	0	0	0	0	0	0	0	0	0
18457_00097	7040.25	4641.85	3368.6	RT	VPL	unknown	Vipr2-IRES2-Cre-neo;Ai166_381484-18457	18457	TH_core		0	0	0	1422.39	0	0	667.656	1921.1	0	22297	489.872	0	0	0	0	0	0	0	0	0	0	0	0	0	0	0	0	0	0	0	0	0	0	0	0	0	0	0	0
18457_00098	6868.3	4578.9	3648.52	VPL	VPM	unknown	Vipr2-IRES2-Cre-neo;Ai166_381484-18457	18457	TH_core		0	0	0	0	0	0	22937.4	0	0	0	3027.61	0	0	0	0	0	0	0	0	0	0	0	0	0	0	0	0	0	0	0	0	0	0	0	0	0	0	0	0
18457_00099	6776.05	4679.3	3504.92	RT	VPL	unknown	Vipr2-IRES2-Cre-neo;Ai166_381484-18457	18457	TH_core	large arbor, single	0	0	0	5371.87	0	0	14557.8	5203.14	0	17115.2	0	0	0	0	0	0	0	0	0	0	0	0	0	0	0	0	0	0	0	0	0	0	0	0	0	0	0	0	0
18457_00101	6731.4	4458.85	3821.02	VPM	VPM	unknown	Vipr2-IRES2-Cre-neo;Ai166_381484-18457	18457	TH_core		0	3260.08	0	29.592	0	0	43160.9	0	0	0	0	0	0	0	0	0	0	0	0	0	0	0	0	0	0	0	0	0	0	0	0	0	0	0	0	0	0	0	0
18457_00102	7107.12	4920.65	3242.75	fiber tracts	VPL	unknown	Vipr2-IRES2-Cre-neo;Ai166_381484-18457	18457	TH_core		0	0	0	963.594	29.9265	0	670.163	32720.4	0	49.9371	1421.59	0	0	0	0	0	0	0	0	0	0	0	0	0	0	0	0	0	0	0	0	0	0	0	0	0	0	0	0
18457_00103	4303.08	4400.15	4225.35	CP	CP	unknown	Vipr2-IRES2-Cre-neo;Ai166_381484-18457	18457	CP_SNr		0	0	0	0	0	0	0	0	0	0	0	0	0	0	0	0	0	0	0	0	0	0	0	0	0	0	0	0	0	0	0	0	0	0	0	0	0	0	0
18457_00106	4417.75	4833.23	4186.67	CP	CP	unknown	Vipr2-IRES2-Cre-neo;Ai166_381484-18457	18457	CP_GPe		0	0	0	0	0	0	0	0	0	0	0	0	0	0	0	0	0	0	0	0	0	0	0	0	0	0	0	0	0	0	0	0	0	0	0	0	0	0	0
18457_00108	4022.68	4982.58	4695.08	ACB	CP	unknown	Vipr2-IRES2-Cre-neo;Ai166_381484-18457	18457	CP_SNr		0	0	0	0	0	0	0	0	0	0	0	0	0	0	0	0	0	0	0	0	0	0	0	0	0	0	0	0	0	0	0	0	0	0	0	0	0	0	0
18457_00110	6471.7	4616.65	4328.1	VAL	VM	unknown	Vipr2-IRES2-Cre-neo;Ai166_381484-18457	18457	TH_matrix		329.3	51680.4	42103.8	3266.87	423.996	138.465	1472.19	7513.42	0	646.697	1353.3	2773.96	88.6675	0	0	0	0	0	0	0	0	0	0	0	0	0	0	89.656	0	582.413	0	0	645.019	112.593	0	0	0	0	0
18457_00111	6382	4921.17	4176.75	RT	VM	unknown	Vipr2-IRES2-Cre-neo;Ai166_381484-18457	18457	TH_matrix		0	10210.2	5744.81	0	1017.92	35412.3	0	3432.94	12264.9	3719.84	0	0	0	0	0	0	0	0	875.189	0	0	0	0	0	0	1942.93	0	200.233	0	0	0	0	0	0	0	1442.35	0	0	6240.57
18457_00112	6956.7	4975.48	4576.38	VM	VM	unknown	Vipr2-IRES2-Cre-neo;Ai166_381484-18457	18457	TH_matrix		248.233	45247	36010.7	0	0	0	6133.19	380.606	0	0	0	662.681	1288.08	0	0	0	0	0	0	0	0	0	0	0	0	0	0	0	0	1308.12	0	89.7111	1757.86	1485.59	0	0	0	0	0
18457_00113	5373.5	5713.95	2376.05	EPd	CP	unknown	Vipr2-IRES2-Cre-neo;Ai166_381484-18457	18457	CP_SNr		0	0	0	0	0	0	0	0	0	0	0	0	0	0	0	0	0	0	0	0	0	0	0	0	0	0	0	0	0	0	0	0	0	0	0	0	0	0	0
18457_00114	6095.65	5448.33	2467.7	CP	CP	unknown	Vipr2-IRES2-Cre-neo;Ai166_381484-18457	18457	CP_others		0	0	0	0	0	0	0	0	0	0	0	0	0	0	0	0	0	0	0	0	0	0	0	0	0	0	0	0	0	0	0	0	0	0	0	0	0	0	0
18457_00115	4220.77	5556.42	4829.55	ACB	ACB	unknown	Vipr2-IRES2-Cre-neo;Ai166_381484-18457	18457			0	0	0	0	0	0	0	0	0	0	0	0	0	0	0	0	0	0	0	0	0	0	0	0	0	0	0	0	0	0	0	0	0	0	0	0	0	0	0
18457_00116	5330.52	6941.25	3321.38	OT	SI	unknown	Vipr2-IRES2-Cre-neo;Ai166_381484-18457	18457			0	0	0	0	0	0	0	0	0	0	0	0	0	0	0	0	0	0	0	0	0	0	0	0	0	0	0	0	0	0	0	0	0	0	0	0	0	0	0
18457_00117	7547.6	4287.02	3023.62	LGv	VPL	unknown	Vipr2-IRES2-Cre-neo;Ai166_381484-18457	18457	TH_core		0	0	0	0	614.893	0	0	0	1949.53	0	0	0	0	49.9755	3213.59	0	2371.84	0	0	0	0	0	0	0	0	0	0	0	0	0	0	0	0	0	0	0	0	0	11307.8
18457_00118	7257.33	4244.27	3289.77	VPL	VPL	unknown	Vipr2-IRES2-Cre-neo;Ai166_381484-18457	18457	TH_core		0	0	0	12202.4	9397.98	0	0	0	0	0	49.925	0	0	0	0	0	0	0	0	0	0	0	0	0	0	0	0	0	0	0	0	0	0	0	0	0	0	0	0
18457_00119	7322.27	4232.17	3260.98	VPL	VPM	unknown	Vipr2-IRES2-Cre-neo;Ai166_381484-18457	18457	TH_core		0	0	0	0	17449.9	0	0	0	0	0	512.034	0	0	0	0	0	0	0	0	0	0	0	0	0	0	0	0	0	0	0	0	0	0	0	0	0	0	0	0
18457_00120	7207.95	4387.95	2956.95	fiber tracts	VPL	unknown	Vipr2-IRES2-Cre-neo;Ai166_381484-18457	18457	TH_core		0	0	0	0	238.348	2881.75	0	1027.21	26374.6	704.169	1178.98	0	278.518	0	0	0	1169.18	0	0	0	0	0	0	0	0	0	0	0	0	0	0	0	0	0	0	0	0	0	228.511
18457_00121	7526.67	4306.7	3042.65	unknown	VPL	unknown	Vipr2-IRES2-Cre-neo;Ai166_381484-18457	18457	TH_core		0	0	0	0	887.868	0	0	0	2469.17	0	0	0	0	229.92	5749.96	0	407.866	0	0	0	0	0	0	0	0	0	0	0	0	0	0	0	0	0	0	0	0	0	7521.95
18457_00122	7398.95	4398.92	3017.4	fiber tracts	VPL	unknown	Vipr2-IRES2-Cre-neo;Ai166_381484-18457	18457	TH_core		0	0	0	0	0	0	0	0	18123.3	2089.64	0	0	0	39.8444	2602.88	0	0	0	0	0	0	0	0	0	0	0	0	0	0	0	0	0	0	0	0	0	0	0	896.644
18457_00123	7588.4	4456.8	2984.3	fiber tracts	VPL	unknown	Vipr2-IRES2-Cre-neo;Ai166_381484-18457	18457	TH_core		0	0	0	0	39.8927	493.121	0	0	9154.14	0	0	0	0	208.421	4462.23	0	408.635	0	0	0	0	0	0	0	0	0	0	0	0	0	0	0	0	0	0	0	0	0	9992.3
18457_00125	7229.62	4575.83	3040.97	fiber tracts	VPL	unknown	Vipr2-IRES2-Cre-neo;Ai166_381484-18457	18457	TH_core		0	0	0	0	99.8807	20012.2	0	4662.88	0	129.5	769.817	0	0	0	0	0	0	0	0	0	0	0	0	0	0	0	0	0	0	0	0	0	0	0	0	0	0	0	0
18457_00126	7367.42	4437.33	3195.6	RT	VPL	unknown	Vipr2-IRES2-Cre-neo;Ai166_381484-18457	18457	TH_core		0	0	0	3923.57	21186.7	0	0	0	0	7901.95	1464.38	0	0	0	0	0	466.487	0	0	0	0	0	0	0	0	0	0	0	0	0	0	0	0	0	0	0	0	0	0
18457_00127	8306.15	4252.73	3161.65	unknown	MG	unknown	Vipr2-IRES2-Cre-neo;Ai166_381484-18457	18457	TH_core	double targets	0	0	0	0	428.434	476.26	0	1468.26	6030.4	777.867	0	0	0	0	4991.16	0	419.667	0	9.99925	0	0	0	0	0	0	0	0	0	0	0	0	0	0	0	0	0	0	0	9010.23
18457_00128	7230.42	4133.23	3710.62	VPM	VPM	unknown	Vipr2-IRES2-Cre-neo;Ai166_381484-18457	18457	TH_core		0	0	0	5094.31	0	0	0	0	0	0	17507.1	0	0	0	0	0	0	0	0	0	0	0	0	0	0	0	0	0	0	0	0	0	0	0	0	0	0	0	0
18457_00129	7166.62	4198.88	3539.1	VPM	VPM	unknown	Vipr2-IRES2-Cre-neo;Ai166_381484-18457	18457	TH_core		0	0	0	21386.2	0	0	0	0	0	0	1480.28	0	0	0	0	0	0	0	0	0	0	0	0	0	0	0	0	0	0	0	0	0	0	0	0	0	0	0	0
18457_00133	3781.25	5157.05	4888.4	ACB	ACB	unknown	Vipr2-IRES2-Cre-neo;Ai166_381484-18457	18457			0	0	0	0	0	0	0	0	0	0	0	0	0	0	0	0	0	0	0	0	0	0	0	0	0	0	0	0	0	0	0	0	0	0	0	0	0	0	0
18457_00135	6625.12	4606.38	5170.12	SMT	SMT	unknown	Vipr2-IRES2-Cre-neo;Ai166_381484-18457	18457	TH_core	small arbor	0	0	0	0	0	0	0	0	0	0	0	0	0	0	0	0	0	0	0	0	0	0	0	0	0	0	0	0	0	39318.6	0	733.785	0	0	0	0	0	0	0
18457_00136	7028.38	5183.2	5020.5	VM	VM	unknown	Vipr2-IRES2-Cre-neo;Ai166_381484-18457	18457	TH_matrix		5548.19	13090.2	67334	4703.04	308.899	0	0	1534.53	0	1165.02	0	0	0	0	0	0	0	0	0	0	0	0	0	0	0	0	0	628.203	89.5064	6277.84	688.565	1326.75	5365.94	0	0	0	0	0	0
18457_00139	5329.85	4564.12	3338.38	CP	CP	unknown	Vipr2-IRES2-Cre-neo;Ai166_381484-18457	18457	CP_GPe		0	0	0	0	0	0	0	0	0	0	0	0	0	0	0	0	0	0	0	0	0	0	0	0	0	0	0	0	0	0	0	0	0	0	0	0	0	0	0
18457_00140	4634.17	4808.73	4379.1	CP	CP	unknown	Vipr2-IRES2-Cre-neo;Ai166_381484-18457	18457	CP_GPe		0	0	0	0	0	0	0	0	0	0	0	0	0	0	0	0	0	0	0	0	0	0	0	0	0	0	0	0	0	0	0	0	0	0	0	0	0	0	0
18457_00141	4364.08	4882.27	3490.07	CP	CP	unknown	Vipr2-IRES2-Cre-neo;Ai166_381484-18457	18457	CP_GPe		0	0	0	0	0	0	0	0	0	0	0	0	0	0	0	0	0	0	0	0	0	0	0	0	0	0	0	0	0	0	0	0	0	0	0	0	0	0	0
18457_00142	4849.45	4831.33	3903.75	CP	CP	unknown	Vipr2-IRES2-Cre-neo;Ai166_381484-18457	18457	CP_GPe		0	0	0	0	0	0	0	0	0	0	0	0	0	0	0	0	0	0	0	0	0	0	0	0	0	0	0	0	0	0	0	0	0	0	0	0	0	0	0
18457_00143	6879.35	4125.8	4066.45	VPM	VPM	unknown	Vipr2-IRES2-Cre-neo;Ai166_381484-18457	18457	TH_core		0	0	0	34244.9	0	0	1685.92	0	0	0	0	0	0	0	0	0	0	0	0	0	0	0	0	0	0	0	0	0	0	0	0	0	0	0	0	0	0	0	0
18457_00144	6760.02	4443.55	4130.25	VPM	VPM	unknown	Vipr2-IRES2-Cre-neo;Ai166_381484-18457	18457	TH_core		0	169.461	0	0	0	0	32129.7	0	0	0	0	0	0	0	0	0	0	0	0	0	0	0	0	0	0	0	0	0	0	0	0	0	0	0	0	0	0	0	0
18457_00145	7070.98	4595.48	4060.88	VPM	VPM	unknown	Vipr2-IRES2-Cre-neo;Ai166_381484-18457	18457	TH_core		0	0	0	0	0	0	26637.6	0	0	0	0	0	0	0	0	0	0	0	0	0	0	0	0	0	0	0	0	0	0	0	0	0	0	0	0	0	0	0	0
18457_00146	6869.27	4246.73	3870.2	VPM	VPM	unknown	Vipr2-IRES2-Cre-neo;Ai166_381484-18457	18457	TH_core		0	0	0	24975.5	0	0	99.4386	0	0	348.879	0	0	0	0	0	0	0	0	0	0	0	0	0	0	0	0	0	0	0	0	0	0	0	0	0	0	0	0	0
18457_00148	6936.4	4249.85	3679.12	VPM	VPM	unknown	Vipr2-IRES2-Cre-neo;Ai166_381484-18457	18457	TH_core		0	0	0	0	20071	0	0	9.55381	0	2085.68	0	0	0	0	0	0	0	0	0	0	0	0	0	0	0	0	0	0	0	0	0	0	0	0	0	0	0	0	0
18457_00150	7011.42	4414.12	3790.75	VPM	VPM	unknown	Vipr2-IRES2-Cre-neo;Ai166_381484-18457	18457	TH_core		0	0	0	14951.7	0	0	288.878	0	0	443.919	0	0	0	0	0	0	0	0	0	0	0	0	0	0	0	0	0	0	0	0	0	0	0	0	0	0	0	0	0
18457_00152	6828.48	4492	3948.4	VPM	VPM	unknown	Vipr2-IRES2-Cre-neo;Ai166_381484-18457	18457	TH_core		0	0	0	0	0	0	23740.5	129.073	0	0	0	0	0	0	0	0	0	0	0	0	0	0	0	0	0	0	0	0	0	0	0	0	0	0	0	0	0	0	0
18457_00159	6887.75	4684.3	4237.27	VPM	VPM	unknown	Vipr2-IRES2-Cre-neo;Ai166_381484-18457	18457	TH_core		0	376.95	0	0	0	0	25501.8	0	0	0	0	0	0	0	0	0	0	0	0	0	0	0	0	0	0	0	0	0	0	0	0	0	0	0	0	0	0	0	0
18457_00162	6999.4	4719.17	3877.25	VPL	VPM	unknown	Vipr2-IRES2-Cre-neo;Ai166_381484-18457	18457	TH_core		0	0	0	69.7485	0	0	19687	3824.93	0	0	1327.25	0	0	0	0	0	0	0	0	0	0	0	0	0	0	0	0	0	0	0	0	0	0	0	0	0	0	0	0
18457_00163	7059.42	4800.1	3838.02	VPL	VPL	unknown	Vipr2-IRES2-Cre-neo;Ai166_381484-18457	18457	TH_core		0	0	0	49.8032	18135	0	0	0	0	3648.59	2574.75	0	0	0	0	0	0	0	0	0	0	0	0	0	0	0	0	0	0	0	0	0	0	0	0	0	0	0	0
18457_00164	7101.95	4772.1	3694.93	VPL	VPL	unknown	Vipr2-IRES2-Cre-neo;Ai166_381484-18457	18457	TH_core		0	0	0	0	4598.23	0	0	4215.55	8903.94	4554.11	505.074	0	0	0	0	0	0	0	0	0	0	0	0	0	0	0	0	0	0	0	0	0	0	0	0	0	0	0	1188.76
18457_00170	3999.9	5446.67	4953.62	ACB	ACB	unknown	Vipr2-IRES2-Cre-neo;Ai166_381484-18457	18457			0	0	0	0	0	0	0	0	0	0	0	0	0	0	0	0	0	0	0	0	0	0	0	0	0	0	0	0	0	0	0	0	0	0	0	0	0	0	0
18457_00184	4861.35	7482.7	4307.8	unknown	OT	unknown	Vipr2-IRES2-Cre-neo;Ai166_381484-18457	18457			0	0	0	0	0	0	0	0	0	0	0	0	0	0	0	0	0	0	0	0	0	0	0	0	0	0	0	0	0	0	0	0	0	0	0	0	0	0	0
18457_00188	7465.98	5118.38	4805.33	unknown	VM	unknown	Vipr2-IRES2-Cre-neo;Ai166_381484-18457	18457	TH_matrix		2898.5	48508.3	40774.4	0	0	0	29.9689	0	0	0	3737.87	656.183	0	0	0	0	0	0	0	0	0	0	0	0	0	0	0	0	0	347.925	0	0	18715.7	0	0	0	0	0	0
18457_00190	7115.95	4244.67	3694.77	VPM	VPM	unknown	Vipr2-IRES2-Cre-neo;Ai166_381484-18457	18457	TH_core		0	0	0	0	22732.4	0	0	0	0	0	0	0	0	0	0	0	0	0	0	0	0	0	0	0	0	0	0	0	0	0	0	0	0	0	0	0	0	0	0
18457_00194	7329.45	4398.1	3577.27	VPL	VPL	unknown	Vipr2-IRES2-Cre-neo;Ai166_381484-18457	18457	TH_core		0	0	0	0	17241.4	0	0	49.9645	0	1399.61	0	0	0	0	0	0	0	0	0	0	0	0	0	0	0	0	0	0	0	0	0	0	0	0	0	0	0	0	0
18457_00197	7349.35	4494.77	3564.25	VPL	VPL	unknown	Vipr2-IRES2-Cre-neo;Ai166_381484-18457	18457	TH_core		0	0	0	0	136.232	0	0	10128.1	1074.97	528.763	109.705	0	0	1054.99	208.815	0	1114.3	0	0	0	0	0	0	0	0	0	0	0	0	0	0	0	0	0	0	0	0	0	0
18457_00199	7666.5	4461.52	3405.4	ZI	VPL	unknown	Vipr2-IRES2-Cre-neo;Ai166_381484-18457	18457	TH_core		0	0	0	0	0	0	0	0	0	0	0	0	0	29.9888	25248.6	0	0	0	0	0	0	0	0	0	0	0	0	0	0	0	0	0	0	0	0	0	0	0	0
18457_00202	7302.5	4586.58	3528.4	ZI	VPL	unknown	Vipr2-IRES2-Cre-neo;Ai166_381484-18457	18457	TH_core	small arbor, single	0	0	0	0	0	11514.3	0	189.332	0	0	0	0	0	0	0	0	0	0	0	0	0	0	0	0	0	0	0	0	0	0	0	0	0	0	0	0	0	0	0
18457_00203	7221.4	4610.6	3387.95	RT	VPL	unknown	Vipr2-IRES2-Cre-neo;Ai166_381484-18457	18457	TH_core		0	0	0	0	0	1463.91	0	0	15664.9	0	0	0	0	0	0	0	0	0	0	0	0	0	0	0	0	0	0	0	0	0	0	0	0	0	0	11745.9	0	0	1927.06
18457_00204	7250.2	4740.33	4354.45	VPM	VPM	unknown	Vipr2-IRES2-Cre-neo;Ai166_381484-18457	18457	TH_core		0	1114.11	0	0	0	0	30548.5	0	0	0	7444.54	4723.64	7132.25	0	0	0	0	0	0	0	0	0	0	0	0	0	0	0	0	0	0	0	209.232	0	0	0	0	0	0
18457_00205	7306.48	4998.88	3969.15	ZI	VPL	unknown	Vipr2-IRES2-Cre-neo;Ai166_381484-18457	18457	TH_core	large arbor, double	0	22437.3	0	199.882	0	0	785.986	25567.2	0	705.118	5266.3	0	479.779	0	0	0	0	0	0	0	0	0	0	0	0	0	0	0	0	0	0	0	0	0	0	0	0	0	0
18457_00206	7304.52	4837.83	3583.75	ZI	VPL	unknown	Vipr2-IRES2-Cre-neo;Ai166_381484-18457	18457	TH_core		0	1124.27	0	0	0	33289	0	488.55	0	29.9477	289.566	0	0	0	0	0	149.715	0	0	0	0	0	0	0	0	0	0	0	0	0	0	0	0	0	0	0	0	0	0
18457_00209	7140.9	4193.35	5566.77	MD	MD	unknown	Vipr2-IRES2-Cre-neo;Ai166_381484-18457	18457	TH_core	posterior MD	568.922	0	1895.24	0	0	0	0	0	0	0	0	0	0	0	0	0	0	0	0	0	0	0	0	0	0	0	0	0	0	4882.27	0	0	64360.1	0	11257.9	0	0	0	0
18458_00049	7236.65	2887.75	3347.05	LGd	LGd	unknown	Vipr2-IRES2-Cre-neo;Ai166_381487-18458	18458	TH_core		0	0	0	0	0	0	0	0	0	0	0	0	0	0	0	0	0	0	0	0	43767.2	727.769	0	0	939.066	0	0	0	0	0	0	0	0	0	0	0	0	0	0
18458_00050	7211.6	2885.25	3389.9	LGd	LGd	unknown	Vipr2-IRES2-Cre-neo;Ai166_381487-18458	18458	TH_core		0	0	0	0	0	0	0	0	0	0	0	0	0	87.841	0	0	0	279.362	0	139.37	24733.7	0	69.9124	0	0	0	0	0	0	0	0	0	0	0	0	616.719	0	0	0
18458_00051	7393.12	2841.27	3440.83	unknown	LGd	unknown	Vipr2-IRES2-Cre-neo;Ai166_381487-18458	18458	TH_core		0	0	0	0	0	0	0	0	0	0	0	0	0	0	0	0	0	0	0	0	23833.4	648.568	0	0	388.646	0	0	0	0	0	0	0	0	0	0	0	0	0	0
18458_00053	7144.77	2795.2	3866.92	unknown	LGd	unknown	Vipr2-IRES2-Cre-neo;Ai166_381487-18458	18458	TH_core		0	0	0	0	0	0	0	0	0	0	0	0	0	0	0	0	0	0	0	0	18696.9	17293	0	0	419.249	0	0	0	0	0	0	0	0	0	0	512.757	0	0	0
18458_00056	7501.58	3042.02	3138.95	fiber tracts	LGd	unknown	Vipr2-IRES2-Cre-neo;Ai166_381487-18458	18458	TH_core		0	0	0	0	29.982	0	0	0	0	0	119.439	0	0	29.9558	0	0	0	249.663	0	0	21626.1	0	0	0	0	0	0	0	0	0	0	0	0	0	0	0	0	0	0
18458_00057	7464.88	3069.7	3131.72	fiber tracts	LGd	unknown	Vipr2-IRES2-Cre-neo;Ai166_381487-18458	18458	TH_core		0	0	0	0	0	0	0	0	0	0	0	0	0	0	0	0	0	19.9994	0	199.144	21684.2	0	0	0	0	0	0	0	0	0	0	0	0	0	0	0	0	0	0
18458_00069	7908.05	3411.45	3129.6	LGd	LGd	unknown	Vipr2-IRES2-Cre-neo;Ai166_381487-18458	18458	TH_core		0	0	0	0	0	0	0	0	0	0	0	0	0	0	0	0	439.398	0	0	479.773	21595.7	0	0	279.819	49.9934	0	0	0	0	0	0	0	0	0	0	0	0	0	0
18458_00075	6992.45	2905.23	4031.15	LD	LD	unknown	Vipr2-IRES2-Cre-neo;Ai166_381487-18458	18458	TH_matrix		0	0	0	0	959.866	0	0	0	0	0	0	0	0	20.0026	0	409.554	0	688.918	819.26	12202.7	28870.1	9.91777	1621.15	4424.91	692.432	0	0	0	0	0	0	0	0	0	0	3392.37	5875.31	645.143	0
18458_00077	6750.75	2974.4	3745.92	LD	LD	unknown	Vipr2-IRES2-Cre-neo;Ai166_381487-18458	18458	TH_matrix		0	0	149.872	0	289.559	0	0	0	0	0	29.9508	0	0	0	0	0	0	0	22427.8	0	648.747	0	33999.7	0	0	8814.98	906.565	0	0	0	0	0	0	0	0	4243.54	6132.95	169.176	49.5233
18458_00083	7773.15	3077.68	3200.67	fiber tracts	LP	unknown	Vipr2-IRES2-Cre-neo;Ai166_381487-18458	18458	TH_matrix	posterior LP	0	0	0	0	0	0	0	0	0	0	0	0	0	0	0	269.821	39.9991	517.392	0	18885.1	778.362	0	0	9844.1	2232.29	0	0	0	0	0	0	0	0	0	0	0	0	0	0
18458_00086	7568.85	3145.45	3557.8	LGd	LGd	unknown	Vipr2-IRES2-Cre-neo;Ai166_381487-18458	18458	TH_core		0	0	0	0	0	0	0	0	0	0	0	0	0	0	0	10.0033	0	1063.42	0	676.28	29837.5	0	0	0	0	0	0	0	0	0	0	0	0	0	0	0	0	0	0
18458_00101	7817.83	3520.75	3094.7	LGd	LGd	unknown	Vipr2-IRES2-Cre-neo;Ai166_381487-18458	18458	TH_core		0	0	0	0	29.8797	0	0	0	0	0	0	0	0	0	0	0	0	99.4028	0	0	19414	0	89.8681	0	0	0	0	0	0	0	0	0	0	0	0	0	0	0	0
18458_00102	7936.27	3455.4	3074.65	fiber tracts	LGd	unknown	Vipr2-IRES2-Cre-neo;Ai166_381487-18458	18458	TH_core		0	0	0	0	0	0	0	0	0	0	0	0	0	0	549.243	0	317.864	0	0	0	16930.6	0	4308.56	0	0	0	0	0	0	0	0	0	0	0	0	0	0	0	0
18458_00114	6620.55	3885.6	3542.6	VPL	VPL	unknown	Vipr2-IRES2-Cre-neo;Ai166_381487-18458	18458	TH_core		0	0	0	0	12471.4	0	0	0	2357.42	39.801	0	0	0	0	0	0	0	0	0	0	0	0	0	0	0	0	0	0	0	0	0	0	0	0	0	0	0	0	39.8085
18458_00119	6957.6	3830.27	3703.75	VPM	VPM	unknown	Vipr2-IRES2-Cre-neo;Ai166_381487-18458	18458	TH_core		0	0	0	0	19667.7	0	0	0	0	0	79.9985	0	0	0	0	0	0	0	0	0	0	0	0	0	0	0	0	0	0	0	0	0	0	0	0	0	0	0	0
18458_00121	6693.95	3765	4223.05	PO	VPM	unknown	Vipr2-IRES2-Cre-neo;Ai166_381487-18458	18458	TH_core		0	0	0	25022.7	0	0	0	0	0	0	0	0	0	0	0	0	0	0	0	0	0	0	0	0	0	0	0	0	0	0	0	0	0	0	0	0	0	0	0
18458_00122	6908.17	3672.5	3769.38	VPM	VPM	unknown	Vipr2-IRES2-Cre-neo;Ai166_381487-18458	18458	TH_core		0	0	0	0	21636.4	0	0	0	0	0	249.149	0	0	0	0	0	0	0	0	0	0	0	0	0	0	0	0	0	0	0	0	0	0	0	0	0	0	0	0
18458_00125	7112.38	3594.43	3560.73	VPM	VPM	unknown	Vipr2-IRES2-Cre-neo;Ai166_381487-18458	18458	TH_core		0	0	0	0	11538.7	0	0	0	0	0	299.71	0	0	638.167	259.537	0	119.901	0	0	0	0	0	0	0	0	0	0	0	0	0	0	0	0	0	0	0	0	0	0
18458_00148	6949.02	2944.45	4214.27	LD	LP	unknown	Vipr2-IRES2-Cre-neo;Ai166_381487-18458	18458	TH_matrix	anterior LP	0	1662.74	1481.37	0	2694.47	867.153	0	308.026	1384.67	179.61	0	0	0	0	0	0	0	0	1299.59	0	808.561	0	1714.35	0	0	0	0	0	0	0	0	0	0	0	0	2463.13	882.155	0	36408.6
18458_00150	6987.02	3091.82	4177.02	LD	LP	unknown	Vipr2-IRES2-Cre-neo;Ai166_381487-18458	18458	TH_matrix	anterior LP	0	0	0	0	2750.35	0	0	0	1863.69	327.757	0	0	0	0	0	0	0	0	1432.97	0	0	0	0	0	0	0	0	0	0	0	0	0	0	0	0	0	0	0	43120.2
18458_00185	6287.5	3941.07	3982.07	VPL	PO	unknown	Vipr2-IRES2-Cre-neo;Ai166_381487-18458	18458	TH_matrix		0	42355.2	0	0	0	10449.7	0	1076.7	2755.59	189.215	0	0	0	0	0	0	0	0	0	0	0	0	0	0	0	0	0	0	0	0	0	0	0	0	0	5824.81	0	0	0
18458_00236	7231.8	3008.02	3361.4	LGd	LGd	unknown	Vipr2-IRES2-Cre-neo;Ai166_381487-18458	18458	TH_core		0	0	0	0	498.511	0	0	0	0	0	718.175	0	0	0	19.4054	0	0	0	0	0	10396.9	0	0	0	0	0	0	0	0	0	0	0	0	0	0	19488.3	2114.59	0	0
18458_00239	7244.65	3147.88	3705.7	LP	LGd	unknown	Vipr2-IRES2-Cre-neo;Ai166_381487-18458	18458	TH_core		0	0	0	0	0	0	0	0	0	0	0	0	0	0	558.097	239.678	0	496.491	0	1509.9	28565.8	0	0	219.157	0	0	0	0	0	0	0	0	0	0	0	0	0	0	0
18458_00241	7222.2	3055.35	3297.73	LGd	LGd	unknown	Vipr2-IRES2-Cre-neo;Ai166_381487-18458	18458	TH_core		0	0	0	0	0	0	0	0	0	0	0	0	0	0	289.788	329.352	0	0	0	569.053	2106.3	0	0	209.175	0	0	0	0	0	0	0	0	0	0	0	24836.4	9620.12	0	0
18458_00242	7353.67	3320.3	3333.1	LGd	LGd	unknown	Vipr2-IRES2-Cre-neo;Ai166_381487-18458	18458	TH_core		0	0	0	0	1401.11	0	0	0	0	0	0	0	0	0	0	0	0	0	9.99974	0	23545.9	0	25793.4	0	0	0	0	0	0	0	0	0	0	0	0	1353.33	0	0	579.037
18458_00244	7306.42	3232.07	3156.88	LGd	LGd	unknown	Vipr2-IRES2-Cre-neo;Ai166_381487-18458	18458	TH_core		0	0	0	0	0	0	0	0	0	0	0	0	0	59.6789	369.696	339.427	0	548.658	0	229.806	3703.01	0	644.275	0	0	0	0	0	0	0	0	0	0	0	0	19767.5	2693.08	0	0
18458_00249	7545.75	3030.55	3187.77	LGd	LGd	unknown	Vipr2-IRES2-Cre-neo;Ai166_381487-18458	18458	TH_core		0	0	0	0	0	0	0	0	0	0	0	0	0	0	0	0	0	0	0	498.946	16756.2	0	0	319.237	529.272	0	0	0	0	0	0	0	0	0	0	9811.67	528.242	0	0
18458_00250	7860.5	3111.57	3335.35	LGd	LGd	unknown	Vipr2-IRES2-Cre-neo;Ai166_381487-18458	18458	TH_core		0	0	0	0	0	0	0	0	0	0	0	0	0	0	0	0	0	0	0	469.66	2341.69	0	23027.5	139.778	659.283	0	0	0	0	0	0	0	0	0	0	0	0	0	0
18458_00264	7746.58	3344.25	3081.12	LGd	LGd	unknown	Vipr2-IRES2-Cre-neo;Ai166_381487-18458	18458	TH_core		0	0	0	0	0	0	0	0	0	0	209.699	0	0	429.418	359.568	0	0	758.009	0	0	25338.9	0	409.731	0	0	0	0	0	0	0	0	0	0	0	0	0	0	0	0
18458_00267	8075.48	3229.32	3347.98	LGd	LGd	unknown	Vipr2-IRES2-Cre-neo;Ai166_381487-18458	18458	TH_core		0	0	0	0	0	0	0	0	0	0	0	0	0	0	668.815	209.136	0	1163.05	0	3062.92	13145.4	0	0	385.466	0	0	0	0	0	0	0	0	0	0	0	0	0	0	0
18458_00268	6882.38	3875.75	4005.85	VPM	VPM	unknown	Vipr2-IRES2-Cre-neo;Ai166_381487-18458	18458	TH_core		0	0	0	0	22954.8	0	0	0	0	0	0	0	0	0	0	0	0	0	0	0	0	0	0	0	0	0	0	0	0	0	0	0	0	0	0	0	0	0	0
18458_00269	7010.55	3859.3	4040.7	VPM	VPM	unknown	Vipr2-IRES2-Cre-neo;Ai166_381487-18458	18458	TH_core		0	0	0	0	18901.9	0	0	0	0	0	821.252	0	0	0	0	0	0	0	0	0	0	0	0	0	0	0	0	0	0	0	0	0	0	0	0	0	0	0	0
18458_00273	6755.77	3977.2	3913.25	VPM	VPM	unknown	Vipr2-IRES2-Cre-neo;Ai166_381487-18458	18458	TH_core		0	0	0	561.408	18334.8	0	0	0	0	0	0	0	0	0	0	0	0	0	0	0	0	0	0	0	0	0	0	0	0	0	0	0	0	0	0	0	0	0	0
18458_00277	7131.45	3738.77	3746.1	VPM	VPM	unknown	Vipr2-IRES2-Cre-neo;Ai166_381487-18458	18458	TH_core		0	0	0	0	18636	0	0	0	0	0	2980.25	0	0	617.422	0	0	0	0	0	0	0	0	0	0	0	0	0	0	0	0	0	0	0	0	0	0	0	0	0
18458_00280	7125.23	3828.57	3858.48	VPM	VPM	unknown	Vipr2-IRES2-Cre-neo;Ai166_381487-18458	18458	TH_core		0	0	0	0	21309.3	0	0	0	0	0	189.424	0	0	0	0	0	0	0	0	0	0	0	0	0	0	0	0	0	0	0	0	0	0	0	0	0	0	0	0
18458_00281	7040.5	4007.7	3710.73	VPM	VPM	unknown	Vipr2-IRES2-Cre-neo;Ai166_381487-18458	18458	TH_core		0	0	0	0	18914.8	0	0	0	39.895	0	0	0	0	0	0	0	0	0	0	0	0	0	0	0	0	0	0	0	0	0	0	0	0	0	0	0	0	0	0
18458_00302	7908.3	3493.1	2999.02	fiber tracts	IGL	unknown	Vipr2-IRES2-Cre-neo;Ai166_381487-18458	18458			0	0	0	0	0	0	0	0	0	0	0	0	0	0	875.005	695.79	0	468.752	0	309.282	17583.9	0	2927.9	0	0	0	0	0	0	0	0	0	0	0	0	0	0	0	0
18458_00306	7415.42	3912.62	3668	VPM	VPM	unknown	Vipr2-IRES2-Cre-neo;Ai166_381487-18458	18458	TH_core		0	0	0	0	14809.9	0	0	0	0	0	223.92	0	0	389.071	888.538	139.462	0	0	0	0	0	0	0	0	0	0	0	0	0	0	0	0	0	0	0	0	0	0	0
18458_00351	5672.12	4555.92	2632.38	CP	CP	unknown	Vipr2-IRES2-Cre-neo;Ai166_381487-18458	18458	CP_others		0	0	0	0	0	0	0	0	0	0	0	0	0	0	0	0	0	0	0	0	0	0	0	0	0	0	0	0	0	0	0	0	0	0	0	0	0	0	0
18458_00353	5287.45	5058.75	3054.83	CP	CP	unknown	Vipr2-IRES2-Cre-neo;Ai166_381487-18458	18458	CP_GPe		0	0	0	0	0	0	0	0	0	0	0	0	0	0	0	0	0	0	0	0	0	0	0	0	0	0	0	0	0	0	0	0	0	0	0	0	0	0	0
18458_00374	6785.25	4826.65	4540.62	VM	VM	unknown	Vipr2-IRES2-Cre-neo;Ai166_381487-18458	18458	TH_matrix		629.7	57957.7	37759.2	170.885	0	1147.4	329.628	4840.75	0	343.788	0	1545.35	0	0	0	0	0	0	0	0	0	0	0	0	0	0	0	1366.46	0	0	0	0	79.9359	0	0	0	0	0	0
18458_00375	6396.3	4542.62	5085.67	AM	AM	unknown	Vipr2-IRES2-Cre-neo;Ai166_381487-18458	18458	TH_core		0	0	0	0	0	0	0	0	0	0	0	0	0	0	0	0	0	0	0	0	0	0	0	0	0	0	0	0	0	20340.9	0	9329.65	0	0	0	0	0	0	0
18458_00376	6432.55	4618.12	5298.15	unknown	AM	unknown	Vipr2-IRES2-Cre-neo;Ai166_381487-18458	18458	TH_core		0	0	0	0	0	0	0	0	0	0	0	0	0	0	0	0	0	0	0	0	0	0	0	0	0	0	0	0	0	2975.05	49.9005	15946.6	109.127	0	0	0	0	0	0
18458_00386	5081.98	5313.3	2620.45	CP	CP	unknown	Vipr2-IRES2-Cre-neo;Ai166_381487-18458	18458	CP_GPe		0	0	0	0	0	0	0	0	0	0	0	0	0	0	0	0	0	0	0	0	0	0	0	0	0	0	0	0	0	0	0	0	0	0	0	0	0	0	0
18458_00419	6684.92	4133.08	3422.23	VPL	VPL	unknown	Vipr2-IRES2-Cre-neo;Ai166_381487-18458	18458	TH_core		0	0	0	0	1894.54	617.126	0	0	13362.6	98.0118	833.612	0	0	148.466	0	0	0	0	0	0	0	0	0	0	0	0	0	0	0	0	0	0	0	0	0	3388.8	0	0	9325.29
18458_00424	6779.9	4040.5	3652.3	VPM	VPM	unknown	Vipr2-IRES2-Cre-neo;Ai166_381487-18458	18458	TH_core		0	0	0	0	15633.5	0	0	0	0	0	1543.42	0	0	0	0	0	0	0	0	0	0	0	0	0	0	0	0	0	0	0	0	0	0	0	0	0	0	0	0
18458_00430	6898.85	3893.32	4164.42	PO	VPM	unknown	Vipr2-IRES2-Cre-neo;Ai166_381487-18458	18458	TH_core		0	0	0	23620.7	119.246	0	0	0	0	0	339.106	0	0	0	0	0	0	0	0	0	0	0	0	0	0	0	0	0	0	0	0	0	0	0	0	0	0	0	0
18458_00437	6621.45	4467.55	3795.8	VPL	VPL	unknown	Vipr2-IRES2-Cre-neo;Ai166_381487-18458	18458	TH_core		0	0	0	814.612	980.505	287.367	0	13406.2	0	598.445	0	0	0	0	0	0	0	0	0	0	0	0	0	0	0	0	0	0	0	0	0	0	0	0	0	0	0	0	0
18458_00443	6656.75	4184.1	4077.65	VPM	VPM	unknown	Vipr2-IRES2-Cre-neo;Ai166_381487-18458	18458	TH_core		0	0	0	12814.5	0	0	3309	0	0	7162.46	0	0	0	0	0	0	0	0	0	0	0	0	0	0	0	0	0	0	0	0	0	0	0	0	0	0	0	0	0
18458_00444	6719.52	4365.75	3876.33	VPM	VPM	unknown	Vipr2-IRES2-Cre-neo;Ai166_381487-18458	18458	TH_core		0	0	0	3929.15	644.996	0	408.943	418.47	0	25314.2	0	0	0	0	0	0	0	0	0	0	0	0	0	0	0	0	0	0	0	0	0	0	0	0	0	0	0	0	0
18458_00445	6858.45	4271.05	4070.45	VPM	VPM	unknown	Vipr2-IRES2-Cre-neo;Ai166_381487-18458	18458	TH_core		0	0	0	25075.1	0	0	20653.7	0	0	38.6281	4098.89	0	0	0	0	0	0	0	0	0	0	0	0	0	0	0	0	0	0	0	0	0	0	0	0	0	0	0	0
18458_00450	7853	4143.05	3583.48	unknown	MG	unknown	Vipr2-IRES2-Cre-neo;Ai166_381487-18458	18458	TH_core	double targets	0	0	0	0	0	0	0	0	0	0	3065.25	0	329.778	18058	10079.5	1365.08	4748.86	349.038	0	0	0	0	0	0	0	0	0	0	0	0	0	0	0	0	0	0	0	0	0
18458_00456	6695.62	4599.65	3995	VPM	VPL	unknown	Vipr2-IRES2-Cre-neo;Ai166_381487-18458	18458	TH_core		0	140.711	0	0	0	0	7871.45	31094.9	0	276.588	0	0	0	0	0	0	0	0	0	0	0	0	0	0	0	0	0	0	0	0	0	0	0	0	0	0	0	0	0
18458_00458	8248.45	3997.25	3311.77	MG	MG	unknown	Vipr2-IRES2-Cre-neo;Ai166_381487-18458	18458	TH_core	single target	0	0	0	0	0	0	0	0	0	0	0	0	0	539.078	26816	209.648	2170.28	0	0	0	0	0	0	0	0	0	0	0	0	0	0	0	0	0	0	0	0	0	0
18458_00459	8147	4240	3357.15	unknown	MG	unknown	Vipr2-IRES2-Cre-neo;Ai166_381487-18458	18458	TH_core	double targets	0	0	0	0	0	0	0	0	0	0	4092.86	0	0	10070.8	4673.05	1044.47	9865.77	0	0	0	0	0	0	0	0	0	0	0	0	0	0	0	0	0	0	0	0	0	0
18458_00460	6664.23	4014.3	4281.98	PO	VPM	unknown	Vipr2-IRES2-Cre-neo;Ai166_381487-18458	18458	TH_core		0	0	0	10856.3	0	0	10101.2	0	0	0	512.992	0	0	0	0	0	0	0	0	0	0	0	0	0	0	0	0	0	0	0	0	0	0	0	0	0	0	0	0
18458_00461	6705.17	4331.23	4316.95	VPM	VPL	unknown	Vipr2-IRES2-Cre-neo;Ai166_381487-18458	18458	TH_core		0	39.0678	0	348.814	0	0	34812.3	0	0	0	0	0	0	0	0	0	0	0	0	0	0	0	0	0	0	0	0	0	0	0	0	0	0	0	0	0	0	0	0
18458_00468	7015.38	4564.2	4929.88	PCN	VM	unknown	Vipr2-IRES2-Cre-neo;Ai166_381487-18458	18458	TH_matrix		0	41123	46589.1	0	0	0	4369.98	0	0	0	0	708.942	0	0	0	0	0	0	0	0	0	0	0	0	0	0	0	0	0	0	0	0	109.785	0	0	0	0	0	0
18458_00488	4709.12	4902.73	3282.82	CP	CP	unknown	Vipr2-IRES2-Cre-neo;Ai166_381487-18458	18458	CP_others		0	0	0	0	0	0	0	0	0	0	0	0	0	0	0	0	0	0	0	0	0	0	0	0	0	0	0	0	0	0	0	0	0	0	0	0	0	0	0
18458_00496	6538.27	4912.05	3842.35	fiber tracts	VPL	unknown	Vipr2-IRES2-Cre-neo;Ai166_381487-18458	18458	TH_core		0	277.732	0	0	0	0	456.247	43347.7	0	0	0	0	0	0	0	0	0	0	0	0	0	0	0	0	0	0	0	0	0	0	0	0	0	0	0	0	0	0	0
18458_00500	4427.2	5272.95	4613.73	fiber tracts	ACB	unknown	Vipr2-IRES2-Cre-neo;Ai166_381487-18458	18458			0	0	0	0	0	0	0	0	0	0	0	0	0	0	0	0	0	0	0	0	0	0	0	0	0	0	0	0	0	0	0	0	0	0	0	0	0	0	0
18458_00502	3787.2	6744.62	5031.98	OT	OT	unknown	Vipr2-IRES2-Cre-neo;Ai166_381487-18458	18458			0	0	0	0	0	0	0	0	0	0	0	0	0	0	0	0	0	0	0	0	0	0	0	0	0	0	0	0	0	0	0	0	0	0	0	0	0	0	0
18458_00505	6599	5210.88	4532.9	ZI	VM	unknown	Vipr2-IRES2-Cre-neo;Ai166_381487-18458	18458	TH_matrix		0	5314.26	28763.6	0	0	0	1892.87	721.521	0	0	0	0	0	0	0	0	0	0	0	0	0	0	0	0	0	1243.76	0	647.194	0	0	0	0	0	0	0	0	0	0	0
18458_00540	6633.33	4198.6	4064.18	VPM	VPM	unknown	Vipr2-IRES2-Cre-neo;Ai166_381487-18458	18458	TH_core		0	0	0	26789.4	0	0	79.4086	0	0	0	0	0	0	0	0	0	0	0	0	0	0	0	0	0	0	0	0	0	0	0	0	0	0	0	0	0	0	0	0
18458_00541	6899.7	4113.1	4127.1	VPM	VPM	unknown	Vipr2-IRES2-Cre-neo;Ai166_381487-18458	18458	TH_core		0	0	0	11774.6	0	0	0	0	0	0	1376.81	0	0	0	0	0	0	0	0	0	0	0	0	0	0	0	0	0	0	0	0	0	0	0	0	0	0	0	0
18458_00542	6659.12	4192.42	3920.6	VPM	VPM	unknown	Vipr2-IRES2-Cre-neo;Ai166_381487-18458	18458	TH_core		0	0	0	25437	488.516	0	0	0	0	0	0	0	0	0	0	0	0	0	0	0	0	0	0	0	0	0	0	0	0	0	0	0	0	0	0	0	0	0	0
18458_00547	6906.2	4298.05	4119.83	VPM	VPM	unknown	Vipr2-IRES2-Cre-neo;Ai166_381487-18458	18458	TH_core		0	0	0	22412.8	0	0	0	0	0	0	1346.17	0	0	0	0	0	0	0	0	0	0	0	0	0	0	0	0	0	0	0	0	0	0	0	0	0	0	0	0
18458_00548	6772	4496.33	4083.57	VPM	VPM	unknown	Vipr2-IRES2-Cre-neo;Ai166_381487-18458	18458	TH_core		0	0	0	1774.69	0	0	16133.5	0	0	0	548.048	0	0	0	0	0	0	0	0	0	0	0	0	0	0	0	0	0	0	0	0	0	0	0	0	0	0	0	0
18458_00549	6916.7	4532.73	4035.15	VPM	VPM	unknown	Vipr2-IRES2-Cre-neo;Ai166_381487-18458	18458	TH_core		0	69.8746	0	159.323	2974.01	0	0	30236.1	0	429.542	1292.52	0	0	0	0	0	0	0	0	0	0	0	0	0	0	0	0	0	0	0	0	0	0	0	0	0	0	0	0
18458_00551	7106.25	4374.6	3992.7	VPM	VPM	unknown	Vipr2-IRES2-Cre-neo;Ai166_381487-18458	18458	TH_core		0	0	0	24819.2	362.767	0	0	0	0	0	11567.6	0	0	0	0	0	0	0	0	0	0	0	0	0	0	0	0	0	0	0	0	0	0	0	0	0	0	0	0
18458_00555	6664.17	4281.33	3492.3	VPL	VPL	unknown	Vipr2-IRES2-Cre-neo;Ai166_381487-18458	18458	TH_core		0	0	0	0	15286.8	0	0	0	0	4488.19	0	0	0	0	0	0	0	0	0	0	0	0	0	0	0	0	0	0	0	0	0	0	0	0	0	0	0	0	0
18458_00561	7384.02	4252.2	3784.05	VPM	VPM	unknown	Vipr2-IRES2-Cre-neo;Ai166_381487-18458	18458	TH_core		0	0	0	0	11664.5	0	0	0	0	0	24401.2	0	0	8847.7	1890	0	1778.11	0	0	0	0	0	0	0	0	0	0	0	0	0	0	0	0	0	0	0	0	0	0
18458_00562	7337.15	4334.52	3674.25	VPL	VPM	unknown	Vipr2-IRES2-Cre-neo;Ai166_381487-18458	18458	TH_core		0	0	0	0	3078.36	0	0	0	17235.3	1378.33	6014.55	0	1049.49	3461.63	818.428	0	2215.68	0	0	0	0	0	0	0	0	0	0	0	0	0	0	0	0	0	0	0	0	0	316.4
18458_00564	6604.38	4417.58	3551.1	VPL	VPL	unknown	Vipr2-IRES2-Cre-neo;Ai166_381487-18458	18458	TH_core		0	0	0	458.915	9734.37	0	0	1069.35	0	7978.58	0	0	0	0	0	0	0	0	0	0	0	0	0	0	0	0	0	0	0	0	0	0	0	0	0	0	0	0	0
18458_00565	6902.85	4565.4	3564.9	VPL	VPL	unknown	Vipr2-IRES2-Cre-neo;Ai166_381487-18458	18458	TH_core		0	0	0	0	3307.17	0	0	18318.3	0	338.344	2572.81	0	0	329.998	79.8965	0	384.62	0	0	0	0	0	0	0	0	0	0	0	0	0	0	0	0	0	0	0	0	0	0
18458_00567	6988.33	4470.92	3732.25	VPL	VPM	unknown	Vipr2-IRES2-Cre-neo;Ai166_381487-18458	18458	TH_core		0	69.8717	0	1639.22	30027.1	0	0	29180.1	0	1291.97	0	0	0	0	0	0	0	0	0	0	0	0	0	0	0	0	0	0	0	0	0	0	0	0	0	0	0	0	0
18458_00574	7457.15	4570.77	3694	ZI	MG	unknown	Vipr2-IRES2-Cre-neo;Ai166_381487-18458	18458	TH_core		0	0	0	0	0	0	0	0	0	0	0	0	0	0	29164.7	0	1280.59	0	0	0	0	0	0	0	0	0	0	0	0	0	0	0	0	0	0	0	0	0	0
18458_00575	6774.35	4566.6	4333.7	VPM	VPM	unknown	Vipr2-IRES2-Cre-neo;Ai166_381487-18458	18458	TH_core		0	0	0	0	0	0	32331.3	0	0	0	0	0	0	0	0	0	0	0	0	0	0	0	0	0	0	0	0	0	0	0	0	0	0	0	0	0	0	0	0
18458_00577	6678.38	4721.27	3965.5	VPL	VPL	unknown	Vipr2-IRES2-Cre-neo;Ai166_381487-18458	18458	TH_core		0	0	0	0	0	0	30314.2	0	0	0	0	0	0	0	0	0	0	0	0	0	0	0	0	0	0	0	0	0	0	0	0	0	0	0	0	0	0	0	0
18458_00578	6559.85	4757.33	3927.88	VPL	VPL	unknown	Vipr2-IRES2-Cre-neo;Ai166_381487-18458	18458	TH_core		0	59.9626	0	209.786	0	0	24814.8	743.492	0	0	0	0	0	0	0	0	0	0	0	0	0	0	0	0	0	0	0	0	0	0	0	0	0	0	0	0	0	0	0
18458_00580	6852.4	4826.45	4072.85	VPL	VPM	unknown	Vipr2-IRES2-Cre-neo;Ai166_381487-18458	18458	TH_core		0	0	0	216.525	0	0	39777.5	0	0	0	0	0	0	0	0	0	0	0	0	0	0	0	0	0	0	0	0	0	0	0	0	0	0	0	0	0	0	0	0
18458_00583	7044.6	4697.25	3506.48	RT	VPM	unknown	Vipr2-IRES2-Cre-neo;Ai166_381487-18458	18458	TH_core		0	0	0	0	3334.71	0	0	16671.5	0	338.578	2573.05	0	0	339.995	79.8815	0	382.355	0	0	0	0	0	0	0	0	0	0	0	0	0	0	0	0	0	0	0	0	0	0
18458_00584	6935.08	4861.3	3666.77	RT	VPM	unknown	Vipr2-IRES2-Cre-neo;Ai166_381487-18458	18458	TH_core		0	0	0	1051.23	0	0	26987.9	0	0	0	4549.93	0	127.028	0	0	0	0	0	0	0	0	0	0	0	0	0	0	0	0	0	0	0	0	0	0	0	0	0	0
18458_00585	6652.42	5137.27	4461.7	VM	VM	unknown	Vipr2-IRES2-Cre-neo;Ai166_381487-18458	18458	TH_matrix		406.829	8195.01	35652.4	0	0	29.7132	0	347.001	0	0	0	0	0	0	0	0	0	0	0	0	0	0	0	0	0	0	0	0	0	0	0	0	3895.36	0	746.344	0	0	0	0
18458_00586	6890.55	5114.35	3938.5	ZI	VPL	unknown	Vipr2-IRES2-Cre-neo;Ai166_381487-18458	18458	TH_core		0	278.717	0	719.145	0	0	1943.32	39561.7	0	543.942	0	0	0	0	0	0	0	0	0	0	0	0	0	0	0	0	0	0	0	0	0	0	0	0	0	0	0	0	0
18458_00612	7742.2	2911.07	3781.52	LP	LP	unknown	Vipr2-IRES2-Cre-neo;Ai166_381487-18458	18458	TH_matrix	posterior LP	0	0	0	0	0	0	0	0	0	0	0	0	0	0	627.165	119.813	537.724	0	0	675.139	0	0	0	4285.77	3942.03	0	0	0	0	0	0	0	0	0	0	0	0	0	0
18458_00613	6944.98	2942.8	4212.7	LD	LP	unknown	Vipr2-IRES2-Cre-neo;Ai166_381487-18458	18458	TH_matrix	anterior LP	0	0	0	0	1632.39	0	0	0	1342.15	0	0	0	0	0	0	0	0	0	1260.62	0	808.657	0	1708.9	0	0	0	0	0	0	0	0	0	0	0	0	2461.69	1132.56	0	39930.6
18458_00614	7100.52	2832.75	3853.1	LP	LP	unknown	Vipr2-IRES2-Cre-neo;Ai166_381487-18458	18458	TH_matrix	anterior LP	0	0	0	0	0	0	0	0	0	0	0	0	0	259.66	538.258	219.844	0	3573.12	0	1498.17	0	0	0	1723.44	0	0	0	0	0	0	0	0	0	0	0	0	0	0	0
18458_00615	7073.12	2935.3	4198.15	LP	LD	unknown	Vipr2-IRES2-Cre-neo;Ai166_381487-18458	18458	TH_matrix		0	0	0	0	0	0	0	0	0	0	0	0	0	0	447.001	606.844	0	309.199	0	508.544	1243.35	0	0	0	0	0	0	0	0	0	0	0	0	0	0	0	0	0	0
18458_00616	6529.17	4737.7	5154.33	SMT	SMT	unknown	Vipr2-IRES2-Cre-neo;Ai166_381487-18458	18458	TH_core	small arbor	363.802	0	78.4728	0	0	0	0	0	0	0	0	0	0	0	0	0	0	0	0	0	0	0	0	0	0	0	0	0	0	40126.2	0	6692.58	0	0	0	0	0	0	0
18461_2985_x10744_y3095	3162.1	1655.28	4346.2	MOs	MOs	2/3	Cux2-CreERT2;Ai166_374706-18461	18461	CTX_IT		826.397	4830.94	37216.1	0	0	0	0	1049.3	0	0	0	0	0	0	0	0	0	0	0	0	0	0	0	0	0	0	928.544	339.298	0	1185.01	0	0	0	0	0	0	0	0	0
18461_3220_x7596_y9465	3629.02	5098.95	2875.12	AIv	AIv	2/3	Cux2-CreERT2;Ai166_374706-18461	18461			0	0	0	0	0	0	0	0	0	0	0	0	0	0	0	0	0	0	0	0	0	0	0	0	0	0	0	1049.9	3524.17	2465.37	18083.3	3778.84	5037.08	1687.8	24241.8	0	0	0	0
18461_3871_x7813_y3857	4325.02	1918.5	2934.55	MOp	MOp	2/3	Cux2-CreERT2;Ai166_374706-18461	18461	CTX_IT		0	32863.1	10957.2	686.655	0	0	1357.67	7905.73	0	0	6571.22	0	0	0	0	0	0	0	0	0	0	0	0	0	0	0	789.658	0	0	0	0	0	0	0	0	0	0	0	0
18461_4178_x16825_y2713	4868.38	1170.82	4329.15	MOp	MOp	2/3	Cux2-CreERT2;Ai166_374706-18461	18461	CTX_IT		0	16814.9	19891.2	0	0	0	0	0	0	0	0	0	0	0	0	0	0	0	0	0	0	0	0	0	0	1381.56	779.701	0	0	0	0	0	0	0	0	0	4957.88	0	0
18461_4233_x19011_y2874	4529.8	1524.72	3458.88	MOp	SSp-ul	2/3	Cux2-CreERT2;Ai166_374706-18461	18461	CTX_IT		0	30158	139.761	0	0	0	0	14417.9	0	39.7509	0	0	0	0	0	0	0	0	0	0	0	0	0	0	0	9.9981	939.652	0	0	0	0	0	0	0	0	0	0	0	0
18461_4388_x5599_y5781	4873.48	2986.95	1959.47	SSp-m	SSp-n	4	Cux2-CreERT2;Ai166_374706-18461	18461	CTX_IT		0	0	0	0	0	0	24917.5	0	0	0	49.918	0	0	0	0	0	0	0	0	0	0	0	0	0	0	0	0	0	0	0	0	0	0	0	0	0	0	0	0
18461_4410_x23856_y6531	5588.98	3439	1192.05	SSs	SSs	2/3	Cux2-CreERT2;Ai166_374706-18461	18461	CTX_IT		0	569.559	159.813	5303.3	0	329.772	868.84	798.943	0	249.66	44013.6	0	3650.7	0	0	0	0	0	0	0	0	0	0	0	0	159.861	719.653	0	0	0	0	0	0	0	0	0	0	0	0
18461_4545_x5749_y4914	4958.65	2560.52	1966.3	SSp-m	SSp-n	2/3	Cux2-CreERT2;Ai166_374706-18461	18461	CTX_IT		0	1690.23	3225.86	1800.54	0	0	32334.1	0	0	119.776	3010.84	0	0	0	0	0	0	0	0	0	0	0	0	0	0	0	0	0	0	0	0	0	0	0	0	0	0	0	0
18461_4862_x17603_y2198	5540.08	848.2	4250.83	MOp	SSp-ll	2/3	Cux2-CreERT2;Ai166_374706-18461	18461	CTX_IT		0	20507.2	0	0	0	16532.1	0	0	0	0	0	0	0	0	0	0	0	0	0	0	0	0	0	0	0	0	0	0	0	0	0	0	0	0	0	0	0	0	0
18461_5025_x23630_y4542	6392.88	2245.35	1356.5	SSp-bfd	SSp-bfd	2/3	Cux2-CreERT2;Ai166_374706-18461	18461	CTX_IT		0	1174.09	2266.75	2663.27	21432.4	319.479	0	1378.26	0	958.053	11003.8	0	0	0	0	0	0	0	0	0	0	0	0	0	0	0	89.9143	0	0	0	0	0	0	0	0	0	0	699.166	0
18461_6043_x11080_y1667	6835.52	524.925	4321.5	VISa	VISa	2/3	Cux2-CreERT2;Ai166_374706-18461	18461			0	0	404.709	0	0	39.953	0	0	2766.63	0	0	0	0	0	0	0	0	0	1547.52	0	0	0	0	0	0	0	0	0	0	0	0	0	0	0	0	21269.2	4909.76	0	12912.3
18461_7132_x6338_y3287	8229.95	1369.85	2289.05	VISrl	VISrl	4	Cux2-CreERT2;Ai166_374706-18461	18461			0	0	0	0	0	0	0	0	0	0	0	0	0	0	0	0	0	11086.6	0	2037.25	2957.53	0	0	0	0	0	0	0	0	0	0	0	0	0	0	0	0	0	0
18462_00005	4926.12	3015.55	4258.2	CP	CP	unknown	Tnnt1-IRES2-CreERT2;Ai82;Ai140_373641-18462	18462	CP_GPe		0	196.057	0	0	0	0	0	0	0	0	0	0	0	0	0	0	0	0	0	0	0	0	0	0	0	0	0	0	0	0	0	0	0	0	0	0	0	0	0
18462_00007	4849.77	3645.65	4731.9	CP	CP	unknown	Tnnt1-IRES2-CreERT2;Ai82;Ai140_373641-18462	18462	CP_GPe		0	0	0	0	0	0	0	0	0	0	0	0	0	0	0	0	0	0	0	0	0	0	0	0	0	0	0	0	0	0	0	0	0	0	0	0	0	0	0
18462_00009	5061.7	2536.23	3931	fiber tracts	CP	unknown	Tnnt1-IRES2-CreERT2;Ai82;Ai140_373641-18462	18462	CP_GPe		0	819.909	0	0	0	0	0	128.163	0	0	0	0	0	0	0	0	0	0	0	0	0	0	0	0	0	0	0	0	0	0	0	0	0	0	0	0	0	0	0
18462_00013	7104.4	3673.95	3816.8	VPM	VPM	unknown	Tnnt1-IRES2-CreERT2;Ai82;Ai140_373641-18462	18462	TH_core		0	0	0	0	30761.4	0	0	0	0	279.667	0	0	0	0	0	0	0	0	0	0	0	0	0	0	0	0	0	0	0	0	0	0	0	0	0	0	0	0	0
18462_00014	7231.25	3602.65	3768.3	VPM	VPM	unknown	Tnnt1-IRES2-CreERT2;Ai82;Ai140_373641-18462	18462	TH_core		0	0	0	0	20838.9	0	0	0	0	0	757.69	0	0	0	0	0	0	0	0	0	0	0	0	0	0	0	0	0	0	0	0	0	0	0	0	0	0	0	0
18462_00015	7311.5	3680.88	3808.62	VPM	VPM	unknown	Tnnt1-IRES2-CreERT2;Ai82;Ai140_373641-18462	18462	TH_core	small arbor, double	0	0	0	0	23720.9	0	0	0	0	0	1803.95	0	0	457.453	0	0	0	0	0	0	0	0	0	0	0	0	0	0	0	0	0	0	0	0	0	0	0	0	0
18462_00016	6885.27	4030.3	3884.08	VPM	VPM	unknown	Tnnt1-IRES2-CreERT2;Ai82;Ai140_373641-18462	18462	TH_core		0	0	0	758.216	0	0	5510.84	3875.92	0	12942.1	0	0	0	0	0	0	0	0	0	0	0	0	0	0	0	0	0	0	0	0	0	0	0	0	0	0	0	0	0
18462_00017	7222.23	3731.23	4074.33	PO	VPM	unknown	Tnnt1-IRES2-CreERT2;Ai82;Ai140_373641-18462	18462	TH_core		0	0	0	19517.6	0	0	0	0	0	0	0	0	0	0	0	0	0	0	0	0	0	0	0	0	0	0	0	0	0	0	0	0	0	0	0	0	0	0	0
18462_00018	7157.88	3896.15	3974.58	VPM	VPM	unknown	Tnnt1-IRES2-CreERT2;Ai82;Ai140_373641-18462	18462	TH_core		0	0	0	25758.6	0	0	0	0	0	0	79.7613	0	0	0	0	0	0	0	0	0	0	0	0	0	0	0	0	0	0	0	0	0	0	0	0	0	0	0	0
18462_00019	7265.48	3903.43	4254	PO	VPM	unknown	Tnnt1-IRES2-CreERT2;Ai82;Ai140_373641-18462	18462	TH_core		0	0	0	19643.1	0	0	846.927	0	0	0	629.957	0	0	0	0	0	0	0	0	0	0	0	0	0	0	0	0	0	0	0	0	0	0	0	0	0	0	0	0
18462_00020	7469.2	3464.5	3790.5	PO	VPM	unknown	Tnnt1-IRES2-CreERT2;Ai82;Ai140_373641-18462	18462	TH_core		0	0	0	0	9256.16	0	0	0	0	0	8974.11	0	0	339.875	1028.62	0	456.324	0	0	0	0	0	0	0	0	0	0	0	0	0	0	0	0	0	0	0	0	0	0
18462_00021	7390.95	3550.98	3775.23	VPM	VPM	unknown	Tnnt1-IRES2-CreERT2;Ai82;Ai140_373641-18462	18462	TH_core		0	0	0	0	16044	0	0	0	0	0	709.286	0	0	644.154	0	0	0	0	0	0	0	0	0	0	0	0	0	0	0	0	0	0	0	0	0	0	0	0	0
18462_00022	7598.92	3558.02	3721.48	VPM	VPM	unknown	Tnnt1-IRES2-CreERT2;Ai82;Ai140_373641-18462	18462	TH_core		0	0	0	0	179.643	0	0	0	0	0	3822.41	0	0	13614.8	594.53	0	0	0	0	0	0	0	0	0	0	0	0	0	0	0	0	0	0	0	0	0	0	0	0
18462_00023	7916.38	3801.93	4168.67	unknown	MG	unknown	Tnnt1-IRES2-CreERT2;Ai82;Ai140_373641-18462	18462	TH_core		0	0	0	0	0	0	0	0	0	0	13615.3	209.528	28144.2	0	0	0	0	0	0	0	0	0	0	0	0	0	0	0	0	0	0	0	0	19.9866	0	0	0	0	0
18462_00024	8136.05	3459.65	3160.1	fiber tracts	LGd	unknown	Tnnt1-IRES2-CreERT2;Ai82;Ai140_373641-18462	18462	TH_core		0	0	0	0	0	0	0	0	0	0	0	0	0	298.929	1166.29	158.937	0	855.816	0	0	28184.6	0	0	0	0	0	0	0	0	0	0	0	0	0	0	0	0	0	0
18462_00025	8168.55	3296.05	3720.6	LP	MG	unknown	Tnnt1-IRES2-CreERT2;Ai82;Ai140_373641-18462	18462	TH_core		0	0	0	0	0	0	0	0	0	0	0	0	0	536.445	18239.7	838.196	0	0	0	0	0	0	0	0	0	0	0	0	0	0	0	0	0	0	0	0	0	0	0
18462_00026	8397.47	3555.15	3844.6	POL	MG	unknown	Tnnt1-IRES2-CreERT2;Ai82;Ai140_373641-18462	18462	TH_core		0	0	0	0	0	0	0	0	0	0	6088.5	0	5236.93	0	15522.7	0	6891.55	0	0	0	0	0	0	0	0	0	0	0	0	0	0	0	0	0	0	0	0	0	0
18462_00027	6590.02	4204.17	3394.98	RT	VPL	unknown	Tnnt1-IRES2-CreERT2;Ai82;Ai140_373641-18462	18462	TH_core		0	0	0	0	629.004	26449.2	0	776.429	0	478.311	0	0	0	0	0	0	0	0	0	0	0	0	0	0	0	0	0	0	0	0	0	0	0	0	0	0	0	0	0
18462_00028	7031.7	4472.85	4012.17	VPM	VPM	unknown	Tnnt1-IRES2-CreERT2;Ai82;Ai140_373641-18462	18462	TH_core		0	2561.11	0	3107.08	0	0	26040.4	2223.73	0	0	49.8382	0	0	0	0	0	0	0	0	0	0	0	0	0	0	0	0	0	0	0	0	0	0	0	0	0	0	0	0
18462_00029	7454.25	4491.55	4206.73	VPLpc	VPL	unknown	Tnnt1-IRES2-CreERT2;Ai82;Ai140_373641-18462	18462	TH_core		0	6908.55	0	0	0	0	3947.1	0	0	0	14369.6	718.268	23411.3	0	0	0	0	0	0	0	0	0	0	0	0	0	0	0	0	0	0	0	0	526.651	0	0	0	0	0
18462_00030	7444.08	4437.67	4421.8	VPLpc	VPM	unknown	Tnnt1-IRES2-CreERT2;Ai82;Ai140_373641-18462	18462	TH_core		0	6906.67	0	0	0	0	6957.06	0	0	0	16371.9	2012.89	13532.6	0	0	0	0	0	0	0	0	0	0	0	0	0	0	0	0	0	0	0	0	0	0	0	0	0	0
18462_00031	7255.45	4579.48	4762.33	VPMpc	VPM	unknown	Tnnt1-IRES2-CreERT2;Ai82;Ai140_373641-18462	18462	TH_core		0	34395.9	0	0	0	0	20407.2	0	0	0	0	319.21	0	0	0	0	0	0	0	0	0	0	0	0	0	0	0	0	0	0	0	0	0	0	0	0	0	0	0
18462_00032	7516.9	4531.92	4681.88	VPMpc	VPM	unknown	Tnnt1-IRES2-CreERT2;Ai82;Ai140_373641-18462	18462	TH_core		0	0	0	0	0	0	0	0	0	0	11781.1	15221.5	34589.2	0	0	0	0	0	0	0	0	0	0	0	0	0	0	0	0	0	0	0	0	2717.75	0	0	0	0	0
18462_00035	5344.05	3045.27	4194.92	CP	CP	unknown	Tnnt1-IRES2-CreERT2;Ai82;Ai140_373641-18462	18462	CP_others		0	0	0	0	0	0	0	0	0	0	0	0	0	0	0	0	0	0	0	0	0	0	0	0	0	0	0	0	0	0	0	0	0	0	0	0	0	0	0
18462_00038	6501.52	2960.77	3117.82	CP	CP	unknown	Tnnt1-IRES2-CreERT2;Ai82;Ai140_373641-18462	18462	CP_SNr		0	0	0	0	0	0	0	0	0	0	0	0	0	0	0	0	0	0	0	0	0	0	0	0	0	0	0	0	0	0	0	0	0	0	0	0	0	0	0
18462_00040	6944.38	3879.8	3667.75	VPM	VPM	unknown	Tnnt1-IRES2-CreERT2;Ai82;Ai140_373641-18462	18462	TH_core		0	0	0	99.8147	79.1996	0	119.467	4355	0	21549.1	0	0	0	0	0	0	0	0	0	0	0	0	0	0	0	0	0	0	0	0	0	0	0	0	0	0	0	0	0
18462_00041	7030.35	3982.98	3733.52	VPM	VPM	unknown	Tnnt1-IRES2-CreERT2;Ai82;Ai140_373641-18462	18462	TH_core		0	0	0	23698.6	127.88	0	129.817	0	0	2029.08	0	0	0	0	0	0	0	0	0	0	0	0	0	0	0	0	0	0	0	0	0	0	0	0	0	0	0	0	0
18462_00042	6902.92	3928.2	3541.48	VPM	VPM	unknown	Tnnt1-IRES2-CreERT2;Ai82;Ai140_373641-18462	18462	TH_core		0	0	0	469.133	0	0	679.464	27747.5	0	2253.56	0	0	0	0	0	0	0	0	0	0	0	0	0	0	0	0	0	0	0	0	0	0	0	0	0	0	0	0	0
18462_00043	3850.8	3593.48	4154.45	CP	CP	unknown	Tnnt1-IRES2-CreERT2;Ai82;Ai140_373641-18462	18462	CP_GPe		0	0	0	0	0	0	0	0	0	0	0	0	0	0	0	0	0	0	0	0	0	0	0	0	0	0	0	0	0	49.7121	0	0	115.169	0	0	0	0	0	0
18462_00044	7034.27	4402.83	4288.88	VPM	VPM	unknown	Tnnt1-IRES2-CreERT2;Ai82;Ai140_373641-18462	18462	TH_core		0	0	0	0	0	0	28946.1	0	0	0	209.838	0	0	0	0	0	0	0	0	0	0	0	0	0	0	0	0	0	0	0	0	0	0	0	0	0	0	0	0
18462_00045	6805.58	4285.73	3879.38	VPM	VPM	unknown	Tnnt1-IRES2-CreERT2;Ai82;Ai140_373641-18462	18462	TH_core		0	3030.62	0	0	0	0	27793.2	515.889	0	0	0	0	0	0	0	0	0	0	0	0	0	0	0	0	0	0	0	0	0	0	0	0	0	0	0	0	0	0	0
18462_00048	4635.35	4142.48	2663.5	fiber tracts	CP	unknown	Tnnt1-IRES2-CreERT2;Ai82;Ai140_373641-18462	18462	CP_GPe		0	0	0	0	0	0	233.042	0	0	0	471.82	1712.99	0	0	0	0	0	0	0	0	0	0	0	0	0	0	0	0	0	0	0	0	450.56	0	0	0	0	0	0
18462_00049	4495.25	4168.7	2778.88	fiber tracts	CP	unknown	Tnnt1-IRES2-CreERT2;Ai82;Ai140_373641-18462	18462	CP_SNr		0	0	0	0	0	0	0	0	0	0	0	644.43	0	0	0	0	0	0	0	0	0	0	0	0	0	0	0	0	0	0	0	0	532.992	0	0	0	0	0	0
18462_00050	4765.45	3806.07	3012.52	CP	CP	unknown	Tnnt1-IRES2-CreERT2;Ai82;Ai140_373641-18462	18462	CP_GPe		0	0	0	0	0	0	0	0	0	0	0	0	0	0	0	0	0	0	0	0	0	0	0	0	0	0	0	0	0	0	0	0	0	0	0	0	0	0	0
18462_00051	6964.2	4142.83	3769.1	VPM	VPM	unknown	Tnnt1-IRES2-CreERT2;Ai82;Ai140_373641-18462	18462	TH_core		0	0	0	2791.55	0	0	22137.5	0	0	122.817	0	0	0	0	0	0	0	0	0	0	0	0	0	0	0	0	0	0	0	0	0	0	0	0	0	0	0	0	0
18462_00052	7014.17	4309.4	3741.2	VPM	VPM	unknown	Tnnt1-IRES2-CreERT2;Ai82;Ai140_373641-18462	18462	TH_core		0	0	0	1131.93	0	0	20993.1	0	0	129.959	0	0	0	0	0	0	0	0	0	0	0	0	0	0	0	0	0	0	0	0	0	0	0	0	0	0	0	0	0
18462_00053	6930.73	4437.12	3404.23	VPL	VPL	unknown	Tnnt1-IRES2-CreERT2;Ai82;Ai140_373641-18462	18462	TH_core		0	5344.36	0	2258.57	0	27438.3	0	931.376	0	509.959	695.233	0	0	0	0	0	0	0	0	0	0	0	0	0	0	0	0	0	0	0	0	0	0	0	0	0	0	0	0
18462_00054	8053.35	3065.95	3518.95	fiber tracts	LGd	unknown	Tnnt1-IRES2-CreERT2;Ai82;Ai140_373641-18462	18462	TH_core		0	0	0	0	0	0	0	0	0	0	0	0	0	0	0	0	0	0	0	0	38589	0	0	0	0	0	0	0	0	0	0	0	0	0	0	0	0	0	0
18462_00055	7616.15	3536.82	3829.12	PO	VPM	unknown	Tnnt1-IRES2-CreERT2;Ai82;Ai140_373641-18462	18462	TH_core		0	0	0	0	22364.9	0	0	0	0	0	952.266	0	0	0	0	0	0	0	0	0	0	0	0	0	0	0	0	0	0	0	0	0	0	0	0	0	0	0	0
18462_00056	7852.1	3564.3	3750.5	SGN	VPM	unknown	Tnnt1-IRES2-CreERT2;Ai82;Ai140_373641-18462	18462	TH_core		0	0	0	0	12506.2	0	0	0	0	0	14964.4	0	0	308.054	2298.94	804.44	2157.27	688.666	0	0	0	0	0	0	0	0	0	0	0	0	0	0	0	0	0	0	0	0	0
18462_00057	7460.2	3893.48	3464.12	VPM	VPM	unknown	Tnnt1-IRES2-CreERT2;Ai82;Ai140_373641-18462	18462	TH_core		0	0	0	0	12773.4	0	0	0	1695.18	0	219.192	0	0	0	0	0	0	0	0	0	0	0	0	0	0	0	0	0	0	0	0	0	0	0	0	0	0	0	213.805
18462_00058	7717.25	3885.32	3499.02	fiber tracts	VPM	unknown	Tnnt1-IRES2-CreERT2;Ai82;Ai140_373641-18462	18462	TH_core		0	0	0	0	10904.9	0	0	0	0	0	13999	0	0	878.168	1338.32	309.007	389.307	2300.76	0	0	0	0	0	0	0	0	0	0	0	0	0	0	0	0	0	0	0	0	0
18462_00059	7764.48	3798.52	3810.43	fiber tracts	VPM	unknown	Tnnt1-IRES2-CreERT2;Ai82;Ai140_373641-18462	18462	TH_core		0	0	0	0	20983.2	0	0	0	0	0	14086.5	0	0	0	0	0	0	0	0	0	0	0	0	0	0	0	0	0	0	0	0	0	0	0	0	0	0	0	0
18462_00060	8257.88	3975.62	4015.82	POL	VPM	unknown	Tnnt1-IRES2-CreERT2;Ai82;Ai140_373641-18462	18462	TH_core		0	0	0	0	0	0	0	0	0	0	38364.5	0	3942.53	0	0	0	0	0	0	0	0	0	0	0	0	0	0	0	0	0	0	0	0	0	0	0	0	0	0
18462_00061	8158.35	4018.98	3656.77	MG	VPM	unknown	Tnnt1-IRES2-CreERT2;Ai82;Ai140_373641-18462	18462	TH_core		0	0	0	0	0	0	0	0	0	0	51781.9	0	40.0022	651.033	2180.75	0	5405.87	0	0	0	0	0	0	0	0	0	0	0	0	0	0	0	0	0	0	0	0	0	0
18462_00062	7217.15	4868.83	3855.32	ZI	VPM	unknown	Tnnt1-IRES2-CreERT2;Ai82;Ai140_373641-18462	18462	TH_core		0	25411	0	287.996	0	0	2197.93	4803.07	0	0	4558.17	0	0	0	0	0	0	0	0	0	0	0	0	0	0	0	0	0	0	0	0	0	0	0	0	0	0	0	0
18462_00063	7160.52	4979.88	3771.3	ZI	VPL	unknown	Tnnt1-IRES2-CreERT2;Ai82;Ai140_373641-18462	18462	TH_core		0	43620.9	0	767.607	378.763	0	39.9914	9446.81	0	1882.85	0	0	0	0	0	0	0	0	0	0	0	0	0	0	0	0	0	0	0	0	0	0	0	0	0	0	0	0	0
18463_00001	7924.1	3177.07	3547.6	LGd	LGd	unknown	Tnnt1-IRES2-CreERT2;Ai82;Ai140_383680-18463	18463	TH_core		0	0	0	0	0	0	0	0	0	0	0	0	0	0	0	0	0	0	0	579.48	30951.9	0	0	199.965	0	0	0	0	0	0	0	0	0	0	0	0	0	0	0
18463_00002	7304.95	4443.77	4170.12	VPM	VPM	unknown	Tnnt1-IRES2-CreERT2;Ai82;Ai140_383680-18463	18463	TH_core		0	0	0	1089.56	0	0	11837.3	0	0	0	23037.1	0	0	0	0	0	0	0	0	0	0	0	0	0	0	0	0	0	0	0	0	0	0	0	0	0	0	0	0
18463_00003	7279.45	4504.25	4149.25	VPM	VPM	unknown	Tnnt1-IRES2-CreERT2;Ai82;Ai140_383680-18463	18463	TH_core		0	0	0	0	0	0	34032.8	0	0	0	1993.57	0	0	0	0	0	0	0	0	0	0	0	0	0	0	0	0	0	0	0	0	0	0	0	0	0	0	0	0
18463_00004	5937.17	2418.9	3528.35	fiber tracts	CP	unknown	Tnnt1-IRES2-CreERT2;Ai82;Ai140_383680-18463	18463	CP_SNr		0	0	0	0	0	0	0	0	0	0	0	0	0	0	0	0	0	0	0	0	0	0	0	0	0	0	0	0	0	0	0	0	0	0	0	0	0	0	0
18463_00005	5117.75	3295.45	4034.35	CP	CP	unknown	Tnnt1-IRES2-CreERT2;Ai82;Ai140_383680-18463	18463	CP_GPe		0	0	0	0	0	0	0	0	0	0	0	0	0	0	0	0	0	0	0	0	0	0	0	0	0	0	0	0	0	0	0	0	0	0	0	0	0	0	0
18463_00007	5552.62	2946.6	3731.1	CP	CP	unknown	Tnnt1-IRES2-CreERT2;Ai82;Ai140_383680-18463	18463	CP_SNr		0	0	0	0	0	0	0	0	0	0	0	0	0	0	0	0	0	0	0	0	0	0	0	0	0	0	0	0	0	0	0	0	0	0	0	0	0	0	0
18463_00010	5202.15	2648.27	4342.73	fiber tracts	CP	unknown	Tnnt1-IRES2-CreERT2;Ai82;Ai140_383680-18463	18463	CP_GPe		0	0	0	0	0	0	0	0	0	0	0	0	0	0	0	0	0	0	0	0	0	0	0	0	0	0	0	0	0	0	0	0	0	0	0	0	0	0	0
18463_00011	4339.58	3164.38	4444.75	CP	CP	unknown	Tnnt1-IRES2-CreERT2;Ai82;Ai140_383680-18463	18463	CP_GPe		0	563.098	0	0	0	0	0	0	0	0	0	0	0	0	0	0	0	0	0	0	0	0	0	0	0	0	0	0	0	0	0	0	0	0	0	0	0	0	0
18463_00012	7420.05	3631.57	3551.85	VPM	VPM	unknown	Tnnt1-IRES2-CreERT2;Ai82;Ai140_383680-18463	18463	TH_core		0	0	0	0	3290.3	0	0	0	0	0	59.978	0	0	729.941	518.417	159.922	629.464	1657.71	0	0	0	0	0	0	0	0	0	0	0	0	0	0	0	0	0	0	0	0	0
18463_00015	7601.75	3225.88	3254.15	LGd	LGd	unknown	Tnnt1-IRES2-CreERT2;Ai82;Ai140_383680-18463	18463	TH_core		0	0	0	0	0	0	0	0	0	0	0	0	0	0	0	0	0	0	0	499.902	28996.3	0	0	349.744	0	0	0	0	0	0	0	0	0	0	0	429.211	0	0	0
18463_00016	7603.05	3088.3	3632.62	LGd	LGd	unknown	Tnnt1-IRES2-CreERT2;Ai82;Ai140_383680-18463	18463	TH_core		0	0	0	0	349.345	0	0	0	0	0	0	0	0	0	0	0	0	0	0	379.779	52619.9	0	0	0	0	0	0	0	0	0	0	0	0	0	0	0	0	0	0
18463_00018	7811.92	3336.73	3291.07	LGd	LGd	unknown	Tnnt1-IRES2-CreERT2;Ai82;Ai140_383680-18463	18463	TH_core		0	0	0	0	0	0	0	0	0	0	19.9915	0	0	29.9841	0	0	0	278.953	0	0	19374.1	0	147.711	0	0	0	0	0	0	0	0	0	0	0	0	2179.68	0	0	0
18463_00019	4791.42	4070	3309.62	CP	CP	unknown	Tnnt1-IRES2-CreERT2;Ai82;Ai140_383680-18463	18463	CP_SNr		0	0	0	0	0	0	0	0	0	0	0	0	0	0	0	0	0	0	0	0	0	0	0	0	0	0	0	0	0	0	0	0	0	0	0	0	0	0	0
18463_00020	4863.15	4249.25	3370.1	CP	CP	unknown	Tnnt1-IRES2-CreERT2;Ai82;Ai140_383680-18463	18463	CP_SNr		0	0	0	0	0	0	0	0	0	0	0	0	0	0	0	0	0	0	0	0	0	0	0	0	0	0	0	0	0	0	0	0	0	0	0	0	0	0	0
18463_00021	4575.67	4352.48	3241.52	CP	CP	unknown	Tnnt1-IRES2-CreERT2;Ai82;Ai140_383680-18463	18463	CP_SNr		0	0	0	0	0	0	0	0	0	0	0	0	0	0	0	0	0	0	0	0	0	0	0	0	0	0	0	0	0	0	0	0	0	0	0	0	0	0	0
18463_00024	4230.85	4462.77	3209.15	CP	CP	unknown	Tnnt1-IRES2-CreERT2;Ai82;Ai140_383680-18463	18463	CP_GPe		0	0	0	0	0	0	0	0	0	0	0	0	0	0	0	0	0	0	0	0	0	0	0	0	0	0	0	0	0	0	0	0	78.7638	0	29.8417	0	0	0	0
18463_00027	7095.85	3540.9	4059.23	PO	VPM	unknown	Tnnt1-IRES2-CreERT2;Ai82;Ai140_383680-18463	18463	TH_core		0	0	0	159.912	19988.2	0	0	0	0	0	0	0	0	0	0	0	0	0	0	0	0	0	0	0	0	0	0	0	0	0	0	0	0	0	0	0	0	0	0
18463_00028	7326.75	3628.27	3994.45	PO	VPM	unknown	Tnnt1-IRES2-CreERT2;Ai82;Ai140_383680-18463	18463	TH_core		0	0	0	0	13729.1	0	0	0	0	0	22486.9	0	279.399	107.944	0	0	0	0	0	0	0	0	0	0	0	0	0	0	0	0	0	0	0	0	0	0	0	0	0
18463_00029	7370.98	3987.55	4173.15	PO	VPM	unknown	Tnnt1-IRES2-CreERT2;Ai82;Ai140_383680-18463	18463	TH_core		0	0	0	45346.2	0	0	1007.22	0	0	0	6294.59	0	0	0	0	0	0	0	0	0	0	0	0	0	0	0	0	0	0	0	0	0	0	0	0	0	0	0	0
18463_00031	6815.2	3792.02	4150.52	PO	VPM	unknown	Tnnt1-IRES2-CreERT2;Ai82;Ai140_383680-18463	18463	TH_core		0	0	0	20674	99.2539	0	592.046	915.554	0	5246.5	0	0	0	0	0	0	0	0	0	0	0	0	0	0	0	0	0	0	0	0	0	0	0	0	0	0	0	0	0
18463_00032	8272.85	3661.4	3604.02	MG	MG	unknown	Tnnt1-IRES2-CreERT2;Ai82;Ai140_383680-18463	18463	TH_core	single target	0	0	0	0	0	0	0	0	0	0	0	0	0	30.0064	28962.9	0	379.416	0	0	0	0	0	0	0	0	0	0	0	0	0	0	0	0	0	0	0	0	0	0
18463_00034	6717.3	4420.17	3760.88	VPL	VPL	unknown	Tnnt1-IRES2-CreERT2;Ai82;Ai140_383680-18463	18463	TH_core	small arbor, single	0	0	0	10.0069	3044.03	45.0423	0	12302.6	0	149.823	0	0	0	0	0	0	0	0	0	0	0	0	0	0	0	0	0	0	0	0	0	0	0	0	0	0	0	0	0
18463_00036	7069.33	4538.12	4036.48	VPM	VPM	unknown	Tnnt1-IRES2-CreERT2;Ai82;Ai140_383680-18463	18463	TH_core		0	5173.85	0	629.328	0	0	3427.54	21565.1	0	0	4873.11	0	0	0	0	0	0	0	0	0	0	0	0	0	0	0	0	0	0	0	0	0	0	0	0	0	0	0	0
18463_00037	7060.42	3507	4336.33	PO	VPM	unknown	Tnnt1-IRES2-CreERT2;Ai82;Ai140_383680-18463	18463	TH_core		0	0	0	28874.9	6255.73	0	0	0	0	0	1105.68	0	0	0	0	0	0	0	0	0	0	0	0	0	0	0	0	0	0	0	0	0	0	0	0	0	0	0	0
18463_00038	7054.08	3995.1	4321.55	PO	VPM	unknown	Tnnt1-IRES2-CreERT2;Ai82;Ai140_383680-18463	18463	TH_core		0	0	0	1506.29	0	0	17335	0	0	0	0	0	0	0	0	0	0	0	0	0	0	0	0	0	0	0	0	0	0	0	0	0	0	0	0	0	0	0	0
18463_00039	6819.73	4525.1	4248.55	VPM	VPM	unknown	Tnnt1-IRES2-CreERT2;Ai82;Ai140_383680-18463	18463	TH_core		0	4329.25	0	0	0	0	32342.7	119.835	0	0	0	0	0	0	0	0	0	0	0	0	0	0	0	0	0	0	0	0	0	0	0	0	0	0	0	0	0	0	0
18463_00040	7137.58	4208.95	4379.2	PO	VPM	unknown	Tnnt1-IRES2-CreERT2;Ai82;Ai140_383680-18463	18463	TH_core		0	0	0	643.165	0	0	22829.8	0	0	0	0	0	0	0	0	0	0	0	0	0	0	0	0	0	0	0	0	0	0	0	0	0	0	0	0	0	0	0	0
18463_00041	7306.38	4398.12	4370.35	VPM	VPM	unknown	Tnnt1-IRES2-CreERT2;Ai82;Ai140_383680-18463	18463	TH_core		0	1957.1	0	0	0	0	1473.17	0	0	0	15099	29913.1	1308.47	0	0	0	0	0	0	0	0	0	0	0	0	0	0	0	0	0	0	0	0	0	0	0	0	0	0
18463_00042	5995.2	4803.27	5389.08	RE	RE	unknown	Tnnt1-IRES2-CreERT2;Ai82;Ai140_383680-18463	18463	TH_matrix		0	0	0	0	0	0	0	0	0	0	0	0	0	0	0	0	0	0	0	0	0	0	0	0	0	0	0	0	0	0	0	0	0	0	0	0	0	0	0
18463_00045	6839.1	4215.85	3896.32	VPM	VPM	unknown	Tnnt1-IRES2-CreERT2;Ai82;Ai140_383680-18463	18463	TH_core		0	0	0	825.163	0	0	2005.1	12711.3	0	20837.9	0	0	0	0	0	0	0	0	0	0	0	0	0	0	0	0	0	0	0	0	0	0	0	0	0	0	0	0	0
18463_00046	6635.62	5247.4	5094.77	fiber tracts	SMT	unknown	Tnnt1-IRES2-CreERT2;Ai82;Ai140_383680-18463	18463	TH_core	small arbor	0	0	0	0	0	0	0	0	0	0	0	0	0	0	0	0	0	0	0	0	0	0	0	0	0	0	0	0	0	21514.3	0	17087.5	0	0	0	0	0	0	0
18463_00047	6757.5	5382.25	5145.12	VM	SMT	unknown	Tnnt1-IRES2-CreERT2;Ai82;Ai140_383680-18463	18463	TH_core	large arbor	0	0	0	0	0	0	0	0	0	0	0	0	0	0	0	0	0	0	0	0	0	0	0	0	0	0	0	0	0	51107.4	0	9115.48	0	0	8868.63	0	0	0	0
18463_00051	5802.6	4190.3	2013.45	SSs	CP	unknown	Tnnt1-IRES2-CreERT2;Ai82;Ai140_383680-18463	18463	CP_others		0	0	0	0	0	0	0	0	0	0	1827.11	0	9.99708	0	0	0	0	0	0	0	0	0	0	0	0	0	0	0	0	0	0	0	0	0	0	0	0	0	0
18463_00052	7715.38	3444.18	4565.45	unknown	VPM	unknown	Tnnt1-IRES2-CreERT2;Ai82;Ai140_383680-18463	18463	TH_core		0	2216.41	0	0	1722.31	4772.93	0	9700.96	0	199.787	0	0	0	0	0	0	0	0	0	0	0	0	0	0	0	0	0	0	0	0	0	0	0	0	0	0	0	0	0
18463_00054	7101.7	4773.48	4198.75	VPM	VPM	unknown	Tnnt1-IRES2-CreERT2;Ai82;Ai140_383680-18463	18463	TH_core		0	165.043	0	0	0	0	41215.8	0	0	0	0	0	0	0	0	0	0	0	0	0	0	0	0	0	0	0	0	0	0	0	0	0	0	0	0	0	0	0	0
18463_00055	7185.62	3509.82	4366.88	PO	VPM	unknown	Tnnt1-IRES2-CreERT2;Ai82;Ai140_383680-18463	18463	TH_core		0	0	0	938.877	29409.1	116.881	0	2010.61	0	1470.84	0	0	0	0	0	0	0	0	0	0	0	0	0	0	0	0	0	0	0	0	0	0	0	0	0	0	0	0	0
18463_00056	6978.02	3396.77	3762.88	LD	VPL	unknown	Tnnt1-IRES2-CreERT2;Ai82;Ai140_383680-18463	18463	TH_core	large arbor, single	0	0	0	0	2360.43	0	0	3785.94	36780.7	262.177	449.495	0	0	0	0	0	0	0	0	0	0	0	0	0	0	0	0	0	0	0	0	0	0	0	0	0	0	0	5197.94
18463_00057	7628.08	3319.12	3663.02	LGd	LGd	unknown	Tnnt1-IRES2-CreERT2;Ai82;Ai140_383680-18463	18463	TH_core		0	0	0	0	0	0	0	0	0	0	0	0	0	0	39.9986	408.407	0	2194.76	0	0	0	0	0	0	0	0	0	0	0	0	0	0	0	0	0	0	0	0	0
18463_00058	7505.52	3516.25	3542.05	unknown	VPM	unknown	Tnnt1-IRES2-CreERT2;Ai82;Ai140_383680-18463	18463	TH_core		0	0	0	0	20.0025	0	0	0	0	0	0	0	0	149.924	384.138	319.766	0	539.373	0	0	0	0	0	0	0	0	0	0	0	0	0	0	0	0	0	0	0	0	0
18463_00061	7979.05	3583.3	3946.18	SGN	MG	unknown	Tnnt1-IRES2-CreERT2;Ai82;Ai140_383680-18463	18463	TH_core		0	0	0	0	0	0	0	0	0	0	3225.26	0	0	55227.1	7908.95	0	1685.36	643.615	0	0	0	0	0	0	0	0	0	0	0	0	0	0	0	0	0	0	0	0	0
18463_00062	8520.2	3619.6	3628.45	PoT	MG	unknown	Tnnt1-IRES2-CreERT2;Ai82;Ai140_383680-18463	18463	TH_core	double targets	0	0	0	0	0	0	0	0	0	0	0	0	0	0	15101.4	12894.7	2269.04	0	0	0	0	0	0	19.9992	0	0	0	0	0	0	0	0	0	0	0	0	0	0	0
18463_00066	7108.83	3910.93	4091.18	VPM	VPM	unknown	Tnnt1-IRES2-CreERT2;Ai82;Ai140_383680-18463	18463	TH_core		0	0	0	18764.4	1664.16	0	0	0	0	0	896.016	0	0	0	0	0	0	0	0	0	0	0	0	0	0	0	0	0	0	0	0	0	0	0	0	0	0	0	0
18463_00067	7361.33	4022.7	4070.38	VPM	VPM	unknown	Tnnt1-IRES2-CreERT2;Ai82;Ai140_383680-18463	18463	TH_core		0	0	0	17977.1	1375.42	0	0	0	0	0	459.792	0	0	409.489	528.395	0	706.065	0	0	0	0	0	0	0	0	0	0	0	0	0	0	0	0	0	0	0	0	0	0
18463_00068	7462.75	4397.12	4294.1	VPM	VPM	unknown	Tnnt1-IRES2-CreERT2;Ai82;Ai140_383680-18463	18463	TH_core		0	0	0	3686.89	157.175	0	35812.3	0	0	0	0	0	0	0	0	0	0	0	0	0	0	0	0	0	0	0	0	0	0	0	0	0	0	0	0	0	0	0	0
18463_00069	7049.27	3852.12	3890.1	VPM	VPM	unknown	Tnnt1-IRES2-CreERT2;Ai82;Ai140_383680-18463	18463	TH_core		0	0	0	9103.82	9327.88	0	0	0	0	384.894	0	0	0	0	0	0	0	0	0	0	0	0	0	0	0	0	0	0	0	0	0	0	0	0	0	0	0	0	0
18463_00071	7374.4	4255.95	3800.02	VPM	VPL	unknown	Tnnt1-IRES2-CreERT2;Ai82;Ai140_383680-18463	18463	TH_core		0	0	0	498.706	2406.3	0	0	25413	0	1571.66	0	0	0	0	0	0	0	0	0	0	0	0	0	0	0	0	0	0	0	0	0	0	0	0	0	0	0	0	0
18463_00072	8637.7	3920.18	3630.98	unknown	MG	unknown	Tnnt1-IRES2-CreERT2;Ai82;Ai140_383680-18463	18463	TH_core	single target	0	0	0	0	0	0	0	0	0	0	0	0	10.0031	0	26508.2	0	1777.33	0	0	0	0	0	0	0	0	0	0	0	0	0	0	0	0	0	0	0	0	0	0
18463_00073	7197.9	4835.85	3662.18	ZI	VPL	unknown	Tnnt1-IRES2-CreERT2;Ai82;Ai140_383680-18463	18463	TH_core	small arbor, double	0	0	0	507.658	1781.44	0	150.837	34660.6	0	3534.16	7282.52	0	0	0	0	0	0	0	0	0	0	0	0	0	0	0	0	0	0	0	0	0	0	0	0	0	0	0	0
18463_00074	7295.2	4100.08	1906.75	CP	CP	unknown	Tnnt1-IRES2-CreERT2;Ai82;Ai140_383680-18463	18463	CP_GPe		0	0	0	0	0	0	0	0	0	0	0	0	0	0	0	0	0	0	0	0	0	0	0	0	0	0	0	0	0	0	0	0	0	0	0	0	0	0	0
18463_00075	6807.83	4615.45	2164.7	CP	CP	unknown	Tnnt1-IRES2-CreERT2;Ai82;Ai140_383680-18463	18463	CP_GPe		0	0	0	0	0	0	0	0	0	0	0	0	0	0	0	0	0	0	0	0	0	0	0	0	0	0	0	0	0	0	0	0	0	0	0	0	0	0	0
18464_00004	6119.52	3389.32	2492.75	CP	CP	unknown	Vipr2-IRES2-Cre-neo;Ai166_381488-18464	18464	CP_SNr		0	0	0	0	0	0	0	0	0	0	0	0	0	0	0	0	0	0	0	0	0	0	0	0	0	0	0	0	0	0	0	0	0	0	0	0	0	0	0
18464_00009	4845.17	2928.1	4000.95	CP	CP	unknown	Vipr2-IRES2-Cre-neo;Ai166_381488-18464	18464	CP_SNr		0	0	0	0	0	0	0	0	0	0	0	0	0	0	0	0	0	0	0	0	0	0	0	0	0	0	0	0	0	0	0	0	0	0	0	0	0	0	0
18464_00010	5238.65	3117.93	4048.75	CP	CP	unknown	Vipr2-IRES2-Cre-neo;Ai166_381488-18464	18464	CP_GPe		0	0	0	0	0	0	0	0	0	0	0	0	0	0	0	0	0	0	0	0	0	0	0	0	0	0	0	0	0	0	0	0	0	0	0	0	0	0	0
18464_00016	5098.95	3218.88	4625.2	CP	CP	unknown	Vipr2-IRES2-Cre-neo;Ai166_381488-18464	18464	CP_GPe		0	0	0	0	0	0	0	0	0	0	0	0	0	0	0	0	0	0	0	0	0	0	0	0	0	0	0	0	0	0	0	0	0	0	0	0	0	0	0
18464_00029	8609.17	3667.02	3176.85	MG	MG	unknown	Vipr2-IRES2-Cre-neo;Ai166_381488-18464	18464	TH_core	single target	0	0	0	0	0	0	0	0	0	0	0	0	0	0	893.429	1075.28	25658.1	0	0	0	0	0	0	0	0	0	0	0	0	0	0	0	0	0	0	0	0	0	0
18464_00031	7918.05	2994.2	3699.95	LP	LGd	unknown	Vipr2-IRES2-Cre-neo;Ai166_381488-18464	18464	TH_core		0	0	0	0	0	0	0	0	0	0	0	0	0	19.9867	409.793	0	0	0	0	179.512	34466.2	0	0	0	0	0	0	0	0	0	0	0	0	0	0	0	0	0	0
18464_00042	7010.98	3982.18	3742.92	VPM	VPM	unknown	Vipr2-IRES2-Cre-neo;Ai166_381488-18464	18464	TH_core		0	0	0	0	21961.2	0	0	0	0	0	0	0	0	0	0	0	0	0	0	0	0	0	0	0	0	0	0	0	0	0	0	0	0	0	0	0	0	0	0
18464_00044	6901.38	3978.2	3982.8	VPM	VPM	unknown	Vipr2-IRES2-Cre-neo;Ai166_381488-18464	18464	TH_core		0	0	0	17542.2	6815.63	0	0	0	0	0	0	0	0	0	0	0	0	0	0	0	0	0	0	0	0	0	0	0	0	0	0	0	0	0	0	0	0	0	0
18464_00045	7094.92	3948.45	4045.3	VPM	VPM	unknown	Vipr2-IRES2-Cre-neo;Ai166_381488-18464	18464	TH_core		0	0	0	26321.5	259.515	0	0	0	0	0	0	0	0	0	0	0	0	0	0	0	0	0	0	0	0	0	0	0	0	0	0	0	0	0	0	0	0	0	0
18464_00046	7018.02	4150	4149.33	VPM	VPM	unknown	Vipr2-IRES2-Cre-neo;Ai166_381488-18464	18464	TH_core		0	0	0	24232.2	0	0	0	0	0	0	0	0	0	0	0	0	0	0	0	0	0	0	0	0	0	0	0	0	0	0	0	0	0	0	0	0	0	0	0
18464_00047	7279.25	3677.65	3729.12	VPM	VPM	unknown	Vipr2-IRES2-Cre-neo;Ai166_381488-18464	18464	TH_core		0	0	0	0	28087.3	0	0	0	0	0	1061.81	0	0	209.572	0	0	0	0	0	0	0	0	0	0	0	0	0	0	0	0	0	0	0	0	0	0	0	0	0
18464_00048	7432.1	3832.35	3685.77	VPM	VPM	unknown	Vipr2-IRES2-Cre-neo;Ai166_381488-18464	18464	TH_core		0	0	0	0	19112.1	0	0	0	0	0	0	0	0	0	0	0	0	0	0	0	0	0	0	0	0	0	0	0	0	0	0	0	0	0	0	0	0	0	0
18464_00049	7286.75	3813.38	3837.52	VPM	VPM	unknown	Vipr2-IRES2-Cre-neo;Ai166_381488-18464	18464	TH_core		0	0	0	0	33046.2	0	0	0	0	0	239.717	0	0	0	0	0	0	0	0	0	0	0	0	0	0	0	0	0	0	0	0	0	0	0	0	0	0	0	0
18464_00052	7361.08	3925	3670.35	VPM	VPM	unknown	Vipr2-IRES2-Cre-neo;Ai166_381488-18464	18464	TH_core		0	0	0	0	19998.6	0	0	0	0	0	1994.65	0	0	841.712	671.463	0	329.174	0	0	0	0	0	0	0	0	0	0	0	0	0	0	0	0	0	0	0	0	0	0
18464_00061	5634.17	3643.18	4254.45	CP	CP	unknown	Vipr2-IRES2-Cre-neo;Ai166_381488-18464	18464	CP_GPe		0	0	0	0	0	0	0	0	0	0	0	0	0	0	0	0	0	0	0	0	0	0	0	0	0	0	0	0	0	0	0	0	0	0	0	0	0	0	0
18464_00071	7139.48	2979.65	4197.55	LP	LP	unknown	Vipr2-IRES2-Cre-neo;Ai166_381488-18464	18464	TH_matrix	anterior LP	0	0	0	0	0	0	0	0	2786.05	0	0	0	0	0	0	0	0	0	7637.87	0	2605.13	0	2801.86	0	0	0	0	0	0	0	0	0	0	0	0	9313.66	13360.2	0	8029.44
18464_00072	7036.25	3071.45	4156.73	LD	LP	unknown	Vipr2-IRES2-Cre-neo;Ai166_381488-18464	18464	TH_matrix	anterior LP	0	559.214	838.286	0	0	0	0	0	169.733	0	0	0	0	0	0	0	0	0	18900.2	0	1504.24	0	2183.87	0	0	899.666	1353.45	0	0	0	0	0	0	0	0	3991.54	856.943	0	22820.4
18464_00074	7094.4	3564.45	3898.68	PO	VPM	unknown	Vipr2-IRES2-Cre-neo;Ai166_381488-18464	18464	TH_core	large arbor, single	0	0	0	0	46520.5	0	0	0	0	0	3537.17	0	0	0	0	0	0	0	0	0	0	0	0	0	0	0	0	0	0	0	0	0	0	0	0	0	0	0	0
18464_00075	6897.45	3983.3	3850.88	VPM	VPM	unknown	Vipr2-IRES2-Cre-neo;Ai166_381488-18464	18464	TH_core		0	0	0	23624.3	0	0	0	0	0	0	0	0	0	0	0	0	0	0	0	0	0	0	0	0	0	0	0	0	0	0	0	0	0	0	0	0	0	0	0
18464_00076	7087.67	4034.27	3836.27	VPM	VPM	unknown	Vipr2-IRES2-Cre-neo;Ai166_381488-18464	18464	TH_core		0	0	0	7091.96	0	0	0	0	0	0	14957.3	0	0	0	0	0	0	0	0	0	0	0	0	0	0	0	0	0	0	0	0	0	0	0	0	0	0	0	0
18464_00079	8094.5	3703.27	3447.5	MG	MG	unknown	Vipr2-IRES2-Cre-neo;Ai166_381488-18464	18464	TH_core	double targets	0	0	0	0	0	0	0	0	0	0	0	0	0	79.7495	32795.4	2163.34	407.248	0	0	0	0	0	0	0	0	0	0	0	0	0	0	0	0	0	0	0	0	0	0
18464_00080	7982.92	3956.93	3442.8	MG	MG	unknown	Vipr2-IRES2-Cre-neo;Ai166_381488-18464	18464	TH_core	double targets	0	0	0	0	0	0	0	0	0	0	298.992	0	0	852.632	30528.9	0	10698.4	0	0	0	0	0	0	0	0	0	0	0	0	0	0	0	0	0	0	0	0	0	0
18464_00081	4972.77	3943.5	3297.65	CP	CP	unknown	Vipr2-IRES2-Cre-neo;Ai166_381488-18464	18464	CP_GPe		0	0	0	0	0	0	0	0	0	0	0	0	0	0	0	0	0	0	0	0	0	0	0	0	0	0	0	0	0	0	0	0	0	0	0	0	0	0	0
18464_00082	4633.45	4931.15	2889.22	CP	CP	unknown	Vipr2-IRES2-Cre-neo;Ai166_381488-18464	18464	CP_GPe		0	0	0	0	0	0	0	0	0	0	0	0	0	0	0	0	0	0	0	0	0	0	0	0	0	0	0	0	0	0	0	0	0	0	0	0	0	0	0
18464_00085	5103	4450.85	2823.5	CP	CP	unknown	Vipr2-IRES2-Cre-neo;Ai166_381488-18464	18464	CP_SNr		0	0	0	0	0	0	0	0	0	0	0	0	0	0	0	0	0	0	0	0	0	0	0	0	0	0	0	0	0	0	0	0	0	0	0	0	0	0	0
18464_00086	5258.48	4956.5	3375.7	CP	CP	unknown	Vipr2-IRES2-Cre-neo;Ai166_381488-18464	18464	CP_SNr		0	0	0	0	0	0	0	0	0	0	0	0	0	0	0	0	0	0	0	0	0	0	0	0	0	0	0	0	0	0	0	0	0	0	0	0	0	0	0
18464_00088	5232.5	5316.55	2781.3	CP	CP	unknown	Vipr2-IRES2-Cre-neo;Ai166_381488-18464	18464	CP_SNr		0	0	0	0	0	0	0	0	0	0	0	0	0	0	0	0	0	0	0	0	0	0	0	0	0	0	0	0	0	0	0	0	0	0	0	0	0	0	0
18464_00108	4620.6	5745.98	3612.23	CP	CP	unknown	Vipr2-IRES2-Cre-neo;Ai166_381488-18464	18464	CP_SNr		0	0	0	0	0	0	0	0	0	0	0	0	0	0	0	0	0	0	0	0	0	0	0	0	0	0	0	0	0	0	0	0	0	0	0	0	0	0	0
18464_00112	4458.33	6678.67	4184.48	SI	SI	unknown	Vipr2-IRES2-Cre-neo;Ai166_381488-18464	18464			0	0	0	0	0	0	0	0	0	0	0	0	0	0	0	0	0	0	0	0	0	0	0	0	0	0	0	0	0	0	0	0	0	0	0	0	0	0	0
18464_00119	7112.6	4264.15	4074	VPM	VPM	unknown	Vipr2-IRES2-Cre-neo;Ai166_381488-18464	18464	TH_core		0	0	0	29412.7	508.393	0	437.231	0	0	0	69.3732	0	0	0	0	0	0	0	0	0	0	0	0	0	0	0	0	0	0	0	0	0	0	0	0	0	0	0	0
18464_00122	7150.05	4478.55	3663.2	VPL	VPL	unknown	Vipr2-IRES2-Cre-neo;Ai166_381488-18464	18464	TH_core		0	0	0	49.8983	1801.73	0	0	34840.9	0	369.562	1686.24	0	0	0	0	0	0	0	0	0	0	0	0	0	0	0	0	0	0	0	0	0	0	0	0	0	0	0	0
18464_00124	6590.42	4425.1	3942.88	VPM	VPM	unknown	Vipr2-IRES2-Cre-neo;Ai166_381488-18464	18464	TH_core		0	0	0	39.9064	0	0	468.877	17230.4	0	9881.78	0	0	0	0	0	0	0	0	0	0	0	0	0	0	0	0	0	0	0	0	0	0	0	0	0	0	0	0	0
18464_00127	6798.65	4489	4132.12	VPM	VPM	unknown	Vipr2-IRES2-Cre-neo;Ai166_381488-18464	18464	TH_core		0	0	0	0	0	0	30212.5	87.9077	0	89.3308	0	0	0	0	0	0	0	0	0	0	0	0	0	0	0	0	0	0	0	0	0	0	0	0	0	0	0	0	0
18464_00128	6727.23	4565.92	4114.67	VPM	VPM	unknown	Vipr2-IRES2-Cre-neo;Ai166_381488-18464	18464	TH_core		0	0	0	0	0	0	26268.1	0	0	0	0	0	0	0	0	0	0	0	0	0	0	0	0	0	0	0	0	0	0	0	0	0	0	0	0	0	0	0	0
18464_00129	6975.33	4433.98	3922.38	VPM	VPM	unknown	Vipr2-IRES2-Cre-neo;Ai166_381488-18464	18464	TH_core		0	0	0	10385.5	0	0	23369.8	0	0	0	0	0	0	0	0	0	0	0	0	0	0	0	0	0	0	0	0	0	0	0	0	0	0	0	0	0	0	0	0
18464_00132	7714.48	4328.25	4146.08	VPLpc	VPLpc	unknown	Vipr2-IRES2-Cre-neo;Ai166_381488-18464	18464	TH_core		0	0	0	39.0085	0	0	327.757	0	0	0	53424	194.987	9929.8	0	0	0	0	0	0	0	0	0	0	0	0	0	0	0	0	0	0	0	0	983.253	0	0	0	0	0
18464_00133	7140.5	4695.77	3729.4	VPL	VPL	unknown	Vipr2-IRES2-Cre-neo;Ai166_381488-18464	18464	TH_core	large arbor, double	0	0	0	0	1240.3	0	0	39623.8	0	525.226	9568.12	0	4191.27	0	0	0	0	0	0	0	0	0	0	0	0	0	0	0	0	0	0	0	0	0	0	0	0	0	0
18464_00139	6574.5	4918.2	4792.12	VM	VM	unknown	Vipr2-IRES2-Cre-neo;Ai166_381488-18464	18464	TH_matrix		872.345	3034.41	43730.7	0	0	0	0	0	0	0	0	0	0	0	0	0	0	0	0	0	0	0	0	0	0	0	0	0	0	259.099	0	0	0	0	0	0	0	0	0
18464_00141	4927.9	4364.42	3112.25	CP	CP	unknown	Vipr2-IRES2-Cre-neo;Ai166_381488-18464	18464	CP_SNr		0	0	0	0	0	0	0	0	0	0	0	0	0	0	0	0	0	0	0	0	0	0	0	0	0	0	0	0	0	0	0	0	0	0	0	0	0	0	0
18464_00143	6670.77	4312.88	3833.8	VPM	VPM	unknown	Vipr2-IRES2-Cre-neo;Ai166_381488-18464	18464	TH_core		0	0	0	7634.61	0	0	12099.6	0	0	607.077	0	0	0	0	0	0	0	0	0	0	0	0	0	0	0	0	0	0	0	0	0	0	0	0	0	0	0	0	0
18464_00153	5485.62	5345.5	3308.93	CP	CP	unknown	Vipr2-IRES2-Cre-neo;Ai166_381488-18464	18464	CP_SNr		0	0	0	0	0	0	0	0	0	0	0	0	0	0	0	0	0	0	0	0	0	0	0	0	0	0	0	0	0	0	0	0	0	0	0	0	0	0	0
18464_00155	4943.75	5905.3	3864.75	ACB	CP	unknown	Vipr2-IRES2-Cre-neo;Ai166_381488-18464	18464	CP_SNr		0	0	0	0	0	0	0	0	0	0	0	0	0	0	0	0	0	0	0	0	0	0	0	0	0	0	0	0	0	0	0	0	0	0	0	0	0	0	0
18464_00163	5419.48	4827.6	2676.38	CP	CP	unknown	Vipr2-IRES2-Cre-neo;Ai166_381488-18464	18464	CP_GPe		0	0	0	0	0	0	0	0	0	0	0	0	0	0	0	0	0	0	0	0	0	0	0	0	0	0	0	0	0	0	0	0	0	0	0	0	0	0	0
18464_00169	5339.92	5146.88	2507.1	CP	CP	unknown	Vipr2-IRES2-Cre-neo;Ai166_381488-18464	18464	CP_others		0	0	0	0	0	0	0	0	0	0	0	0	0	0	0	0	0	0	0	0	0	0	0	0	0	0	0	0	0	0	0	0	0	0	0	0	0	0	0
18464_00183	6834.52	4215.77	3581.1	VPM	VPM	unknown	Vipr2-IRES2-Cre-neo;Ai166_381488-18464	18464	TH_core		0	0	0	208.891	23804.9	0	0	0	0	0	0	0	0	0	0	0	0	0	0	0	0	0	0	0	0	0	0	0	0	0	0	0	0	0	0	0	0	0	0
18464_00184	7100.2	4313.2	3633.05	VPM	VPL	unknown	Vipr2-IRES2-Cre-neo;Ai166_381488-18464	18464	TH_core		0	0	0	19519.7	934.756	0	0	0	0	303.055	0	0	0	0	0	0	0	0	0	0	0	0	0	0	0	0	0	0	0	0	0	0	0	0	0	0	0	0	0
18464_00191	8899.65	3368.02	3165.2	DG	MG	unknown	Vipr2-IRES2-Cre-neo;Ai166_381488-18464	18464	TH_core	single target	0	0	0	0	0	0	0	0	0	0	0	0	0	0	0	0	89.6596	0	0	0	0	0	0	0	29.8928	0	0	0	0	0	0	0	0	0	0	0	0	0	0
18464_00192	7021.15	3146.35	4402.02	LP	LP	unknown	Vipr2-IRES2-Cre-neo;Ai166_381488-18464	18464	TH_matrix	anterior LP	0	458.345	1134.39	0	0	10.0086	0	99.0749	0	0	0	0	0	0	0	0	0	0	6749.12	0	0	0	0	0	0	1933.96	752.561	0	0	0	0	0	0	0	0	58704.4	10767.8	1933.95	70.1487
18464_00193	8359.65	2979.77	3647.4	fiber tracts	MG	unknown	Vipr2-IRES2-Cre-neo;Ai166_381488-18464	18464	TH_core		0	0	0	0	0	0	0	0	0	0	0	0	0	0	0	0	0	0	0	2164.31	0	1358.07	0	2095.81	18494.4	0	0	0	0	0	0	0	0	0	0	0	0	0	0
18464_00194	8827.9	3241.4	3372.35	unknown	MG	unknown	Vipr2-IRES2-Cre-neo;Ai166_381488-18464	18464	TH_core	double targets	0	0	0	0	0	0	0	0	0	0	0	0	0	0	0	0	403.294	0	0	0	0	0	0	0	0	0	0	0	0	0	0	0	0	0	0	0	0	0	0
18464_00196	7122.15	2983.35	4210.05	LP	LP	unknown	Vipr2-IRES2-Cre-neo;Ai166_381488-18464	18464	TH_matrix	anterior LP	0	0	0	0	0	0	0	0	3562.26	0	0	0	0	0	0	0	0	0	8956.89	0	2703.8	0	4204.42	0	0	0	0	0	0	0	0	0	0	0	0	19768.6	15187.1	0	16804
18464_00197	7033.67	3070.5	4159.65	LD	LP	unknown	Vipr2-IRES2-Cre-neo;Ai166_381488-18464	18464	TH_matrix	anterior LP	0	559.32	828.402	0	0	0	0	0	89.8277	0	0	0	0	0	0	0	0	0	23543	0	1555.05	0	2505.79	0	0	2679.23	1357.33	0	0	0	0	0	0	0	0	4020.61	858.138	0	24100.5
18464_00198	7282.92	3015.65	3861.2	LP	LP	unknown	Vipr2-IRES2-Cre-neo;Ai166_381488-18464	18464	TH_matrix	posterior LP	0	0	0	0	0	0	0	0	0	0	0	0	0	2769.84	0	140.522	0	3190.74	0	1801.17	2294.3	16062.4	18229.4	669.001	379.446	0	0	0	0	0	0	0	0	0	0	4555.01	29.5882	0	0
18465_00001	6471.62	3060.57	2493.08	fiber tracts	CP	unknown	Vipr2-IRES2-Cre-neo;Ai166_383128-18465	18465	CP_GPe		0	0	0	0	0	0	0	0	0	0	0	0	0	0	0	0	0	0	0	0	0	0	0	0	0	0	0	0	0	0	0	0	0	0	0	0	0	0	0
18465_00003	4448.3	4012.2	3108.1	CP	CP	unknown	Vipr2-IRES2-Cre-neo;Ai166_383128-18465	18465	CP_SNr		0	129.302	0	0	0	0	0	0	0	0	0	364.353	0	0	0	0	0	0	0	0	0	0	0	0	0	0	0	0	0	0	0	0	0	0	0	0	0	0	0
18465_00005	5075.15	3422.82	3044.38	CP	CP	unknown	Vipr2-IRES2-Cre-neo;Ai166_383128-18465	18465	CP_SNr		0	0	0	0	0	0	0	0	0	0	0	0	0	0	0	0	0	0	0	0	0	0	0	0	0	0	0	0	0	0	0	0	0	0	0	0	0	0	0
18465_00006	6625.08	3338.3	2384.62	CP	CP	unknown	Vipr2-IRES2-Cre-neo;Ai166_383128-18465	18465	CP_GPe		0	0	0	0	0	0	0	0	0	0	0	0	0	0	0	0	0	0	0	0	0	0	0	0	0	0	0	0	0	0	0	0	0	0	0	0	0	0	0
18465_00007	6086.62	3167.82	3055.38	CP	CP	unknown	Vipr2-IRES2-Cre-neo;Ai166_383128-18465	18465	CP_GPe		0	0	0	0	0	0	0	0	0	0	0	0	0	0	0	0	0	0	0	0	0	0	0	0	0	0	0	0	0	0	0	0	0	0	0	0	0	0	0
18465_00008	6648.85	3170.18	2689.85	CP	CP	unknown	Vipr2-IRES2-Cre-neo;Ai166_383128-18465	18465	CP_GPe		0	0	0	0	0	0	0	0	0	0	0	0	0	0	0	0	0	0	0	0	0	0	0	0	0	0	0	0	0	0	0	0	0	0	0	0	0	0	0
18465_00009	6123.7	3253.68	3166.97	CP	CP	unknown	Vipr2-IRES2-Cre-neo;Ai166_383128-18465	18465	CP_GPe		0	0	0	0	0	0	0	0	0	0	0	0	0	0	0	0	0	0	0	0	0	0	0	0	0	0	0	0	0	0	0	0	0	0	0	0	0	0	0
18465_00011	6310.83	3608.05	2679.88	CP	CP	unknown	Vipr2-IRES2-Cre-neo;Ai166_383128-18465	18465	CP_GPe		0	0	0	0	0	0	0	0	0	0	0	0	0	0	0	0	0	0	0	0	0	0	0	0	0	0	0	0	0	0	0	0	0	0	0	0	0	0	0
18465_00015	5687.42	4202.02	2892.35	CP	CP	unknown	Vipr2-IRES2-Cre-neo;Ai166_383128-18465	18465	CP_GPe		0	0	0	0	0	0	0	0	0	0	0	0	0	0	0	0	0	0	0	0	0	0	0	0	0	0	0	0	0	0	0	0	0	0	0	0	0	0	0
18465_00017	6308.75	3825.07	2481.58	CP	CP	unknown	Vipr2-IRES2-Cre-neo;Ai166_383128-18465	18465	CP_GPe		0	0	0	0	0	0	0	0	0	0	0	0	0	0	0	0	0	0	0	0	0	0	0	0	0	0	0	0	0	0	0	0	0	0	0	0	0	0	0
18465_00018	6064.7	3973.52	2634.17	CP	CP	unknown	Vipr2-IRES2-Cre-neo;Ai166_383128-18465	18465	CP_GPe		0	0	0	0	0	0	0	0	0	0	0	0	0	0	0	0	0	0	0	0	0	0	0	0	0	0	0	0	0	0	0	0	0	0	0	0	0	0	0
18465_00028	5139.45	2657.57	4178.52	CP	CP	unknown	Vipr2-IRES2-Cre-neo;Ai166_383128-18465	18465	CP_GPe		0	0	0	0	0	0	0	0	0	0	0	0	0	0	0	0	0	0	0	0	0	0	0	0	0	0	0	0	0	0	0	0	0	0	0	0	0	0	0
18465_00029	5736.6	2709.18	3903.05	CP	CP	unknown	Vipr2-IRES2-Cre-neo;Ai166_383128-18465	18465	CP_GPe		0	0	0	0	0	0	0	0	0	0	0	0	0	0	0	0	0	0	0	0	0	0	0	0	0	0	0	0	0	0	0	0	0	0	0	0	0	0	0
18465_00030	5400.67	2958.02	2882.22	fiber tracts	CP	unknown	Vipr2-IRES2-Cre-neo;Ai166_383128-18465	18465	CP_GPe		0	0	0	0	0	0	259.025	0	0	0	0	0	0	0	0	0	0	0	0	0	0	0	0	0	0	0	0	0	0	0	0	0	0	0	0	0	0	0	0
18465_00031	5640.6	3018.07	4127.88	CP	CP	unknown	Vipr2-IRES2-Cre-neo;Ai166_383128-18465	18465	CP_GPe		0	0	0	0	0	0	0	0	0	0	0	0	0	0	0	0	0	0	0	0	0	0	0	0	0	0	0	0	0	0	0	0	0	0	0	0	0	0	0
18465_00032	4349.4	3108.8	4620.55	fiber tracts	CP	unknown	Vipr2-IRES2-Cre-neo;Ai166_383128-18465	18465	CP_GPe		0	0	0	0	0	0	0	0	0	0	0	0	0	0	0	0	0	0	0	0	0	0	0	0	0	0	0	0	0	0	0	0	0	0	0	0	0	0	0
18465_00033	4308.3	3092.93	4759.75	fiber tracts	CP	unknown	Vipr2-IRES2-Cre-neo;Ai166_383128-18465	18465	CP_SNr		0	0	0	0	0	0	0	0	0	0	0	0	0	0	0	0	0	0	0	0	0	0	0	0	0	0	0	0	0	0	0	0	0	0	0	0	0	0	0
18465_00034	4111.92	3635.18	3854.27	CP	CP	unknown	Vipr2-IRES2-Cre-neo;Ai166_383128-18465	18465	CP_SNr		0	0	0	0	0	0	0	0	0	0	0	0	0	0	0	0	0	0	0	0	0	0	0	0	0	0	0	0	0	0	0	0	0	0	0	0	0	0	0
18465_00035	3997.82	3499.07	4539.95	CP	CP	unknown	Vipr2-IRES2-Cre-neo;Ai166_383128-18465	18465	CP_SNr		0	0	0	0	0	0	0	0	0	0	0	0	0	0	0	0	0	0	0	0	0	0	0	0	0	0	0	0	0	0	0	0	0	0	0	0	0	0	0
18465_00036	5275.52	3342.57	4288.77	CP	CP	unknown	Vipr2-IRES2-Cre-neo;Ai166_383128-18465	18465	CP_SNr		0	0	0	0	0	0	0	0	0	0	0	0	0	0	0	0	0	0	0	0	0	0	0	0	0	0	0	0	0	0	0	0	0	0	0	0	0	0	0
18465_00037	5035.2	3600.93	4169.85	CP	CP	unknown	Vipr2-IRES2-Cre-neo;Ai166_383128-18465	18465	CP_GPe		0	0	0	0	0	0	0	0	0	0	0	0	0	0	0	0	0	0	0	0	0	0	0	0	0	0	0	0	0	0	0	0	0	0	0	0	0	0	0
18465_00039	5396.67	3714.02	4383.35	CP	CP	unknown	Vipr2-IRES2-Cre-neo;Ai166_383128-18465	18465	CP_GPe		0	0	0	0	0	0	0	0	0	0	0	0	0	0	0	0	0	0	0	0	0	0	0	0	0	0	0	0	0	0	0	0	0	0	0	0	0	0	0
18465_00040	5214.73	3204.07	3489.35	CP	CP	unknown	Vipr2-IRES2-Cre-neo;Ai166_383128-18465	18465	CP_SNr		0	0	0	0	0	0	0	0	0	0	0	0	0	0	0	0	0	0	0	0	0	0	0	0	0	0	0	0	0	0	0	0	0	0	0	0	0	0	0
18465_00041	5518.4	3120.07	3663.85	CP	CP	unknown	Vipr2-IRES2-Cre-neo;Ai166_383128-18465	18465	CP_GPe		0	0	0	0	0	0	0	0	0	0	0	0	0	0	0	0	0	0	0	0	0	0	0	0	0	0	0	0	0	0	0	0	0	0	0	0	0	0	0
18465_00044	5655.65	3699.68	3341.7	CP	CP	unknown	Vipr2-IRES2-Cre-neo;Ai166_383128-18465	18465	CP_GPe		0	0	0	0	0	0	0	0	0	0	0	0	0	0	0	0	0	0	0	0	0	0	0	0	0	0	0	0	0	0	0	0	0	0	0	0	0	0	0
18465_00045	6362.33	3685.02	3016.85	CP	CP	unknown	Vipr2-IRES2-Cre-neo;Ai166_383128-18465	18465	CP_GPe		0	0	0	0	0	0	0	0	0	0	0	0	0	0	0	0	0	0	0	0	0	0	0	0	0	0	0	0	0	0	0	0	0	0	0	0	0	0	0
18465_00046	5410.48	3901.32	3885.55	CP	CP	unknown	Vipr2-IRES2-Cre-neo;Ai166_383128-18465	18465	CP_GPe		0	0	0	0	0	0	0	0	0	0	0	0	0	0	0	0	0	0	0	0	0	0	0	0	0	0	0	0	0	0	0	0	0	0	0	0	0	0	0
18465_00047	6402.27	3754.85	4012.77	VPL	CP	unknown	Vipr2-IRES2-Cre-neo;Ai166_383128-18465	18465			0	22720	31967.3	0	0	1622.81	0	482.487	2117.11	0	199.49	0	0	400.078	0	0	0	0	1813.47	0	736.154	0	527.515	0	0	0	0	0	0	0	0	0	0	0	0	9341.34	8716.1	0	15373.7
18465_00048	6462.73	4028.55	3917.42	VPL	PO	unknown	Vipr2-IRES2-Cre-neo;Ai166_383128-18465	18465	TH_matrix		0	33284.2	168.145	1229.14	267.806	22528.6	0	5935.67	0	748.824	0	0	0	0	0	0	0	0	0	0	0	0	0	0	0	0	0	0	0	0	0	0	0	0	0	0	0	0	0
18465_00050	4883.45	3462.4	4685.15	CP	CP	unknown	Vipr2-IRES2-Cre-neo;Ai166_383128-18465	18465	CP_GPe		0	0	0	0	0	0	0	0	0	0	0	0	0	0	0	0	0	0	0	0	0	0	0	0	0	0	0	0	0	0	0	0	0	0	0	0	0	0	0
18465_00052	8236.97	3822.18	1672.12	CA1	CA1	1	Vipr2-IRES2-Cre-neo;Ai166_383128-18465	18465			0	0	0	0	0	0	0	0	0	0	0	0	0	0	0	0	0	0	0	0	0	0	0	0	0	0	0	0	0	0	0	0	0	0	0	0	0	0	0
18465_00053	8231.53	3804.62	1747.15	CA1	CA1	1	Vipr2-IRES2-Cre-neo;Ai166_383128-18465	18465			0	0	0	0	0	0	0	0	0	0	0	0	0	0	0	0	0	0	0	0	0	0	0	0	0	0	0	0	0	0	0	0	0	0	0	0	0	0	0
18465_00054	6998.52	2537.32	4067.98	CA3	DG	unknown	Vipr2-IRES2-Cre-neo;Ai166_383128-18465	18465			0	0	0	0	0	0	0	0	0	0	0	0	0	0	0	0	0	0	0	0	0	0	0	0	0	0	0	0	0	0	0	0	0	0	0	0	0	0	0
18465_00056	6931.75	2987.62	3654.33	LGd	LGd	unknown	Vipr2-IRES2-Cre-neo;Ai166_383128-18465	18465	TH_core		0	0	0	0	1763.2	0	0	0	0	0	186.438	0	0	0	0	0	0	0	0	0	49008.4	0	276.075	0	0	0	0	0	0	0	0	0	0	0	0	1376.68	0	0	0
18465_00057	7250.08	2938.5	3405.77	LGd	LGd	unknown	Vipr2-IRES2-Cre-neo;Ai166_383128-18465	18465	TH_core		0	0	0	0	0	0	0	0	0	0	0	0	0	0	0	0	149.851	0	0	0	35360	0	0	0	0	0	0	0	0	0	0	0	0	0	0	4003.07	9.99903	0	0
18465_00070	6986.25	2928.43	3987.05	LD	LGd	unknown	Vipr2-IRES2-Cre-neo;Ai166_383128-18465	18465	TH_core		0	0	0	0	0	0	0	0	0	0	19.9778	0	0	0	0	0	0	0	0	0	43450	5826.1	0	0	0	0	0	0	0	0	0	0	0	0	0	716.322	0	0	0
18465_00078	6997.48	3745.82	3478.77	VPM	VPM	unknown	Vipr2-IRES2-Cre-neo;Ai166_383128-18465	18465	TH_core		0	0	0	0	21190.3	0	0	0	0	0	1235.58	0	0	0	0	0	0	0	0	0	0	0	0	0	0	0	0	0	0	0	0	0	0	0	0	0	0	0	0
18465_00079	6976.65	3521.65	3709.65	VPM	VPM	unknown	Vipr2-IRES2-Cre-neo;Ai166_383128-18465	18465	TH_core		0	0	0	0	15144.8	0	0	0	0	0	248.253	0	0	0	0	0	0	0	0	0	0	0	0	0	0	0	0	0	0	0	0	0	0	0	0	0	0	0	0
18465_00080	7062.75	3356.1	3732.42	LD	VPM	unknown	Vipr2-IRES2-Cre-neo;Ai166_383128-18465	18465	TH_core		0	0	0	0	15297.1	0	0	0	0	0	557.636	0	0	597.405	0	0	0	0	0	0	0	0	0	0	0	0	0	0	0	0	0	0	0	0	0	0	0	0	0
18465_00081	7115.88	3711.15	3374.62	VPM	VPM	unknown	Vipr2-IRES2-Cre-neo;Ai166_383128-18465	18465	TH_core		0	0	0	0	18484.5	0	0	0	0	0	367.972	0	0	0	0	0	0	0	0	0	0	0	0	0	0	0	0	0	0	0	0	0	0	0	0	0	0	0	0
18465_00082	7148.6	3608.07	3469.17	VPM	VPM	unknown	Vipr2-IRES2-Cre-neo;Ai166_383128-18465	18465	TH_core		0	0	0	0	17615.2	0	0	0	0	0	1929.9	0	0	0	0	0	0	0	0	0	0	0	0	0	0	0	0	0	0	0	0	0	0	0	0	0	0	0	0
18465_00083	7248.05	3631.85	3627.45	VPM	VPM	unknown	Vipr2-IRES2-Cre-neo;Ai166_383128-18465	18465	TH_core		0	0	0	0	24257.6	0	0	0	0	0	3924.61	0	0	816.874	0	0	9.99674	0	0	0	0	0	0	0	0	0	0	0	0	0	0	0	0	0	0	0	0	0	0
18465_00084	7344.45	3329.55	3609.7	fiber tracts	VPM	unknown	Vipr2-IRES2-Cre-neo;Ai166_383128-18465	18465	TH_core		0	0	0	0	16867.4	0	0	0	0	0	16357.2	0	239.005	2561.34	1150.97	0	429.147	0	0	0	0	0	0	0	0	0	0	0	0	0	0	0	0	0	0	0	0	0	0
18465_00089	6999.7	3270.93	3997.7	LD	VPM	unknown	Vipr2-IRES2-Cre-neo;Ai166_383128-18465	18465	TH_core		0	0	0	39.6325	20205.8	0	0	0	0	0	725.68	0	0	0	0	0	0	0	0	0	0	0	0	0	0	0	0	0	0	0	0	0	0	0	0	0	0	0	0
18465_00090	6793.67	3753.05	3814.65	VPM	VPM	unknown	Vipr2-IRES2-Cre-neo;Ai166_383128-18465	18465	TH_core		0	0	0	1425.57	24915.4	0	0	0	0	0	0	0	0	0	0	0	0	0	0	0	0	0	0	0	0	0	0	0	0	0	0	0	0	0	0	0	0	0	0
18465_00091	6693	3794.85	4016.17	VPM	VPM	unknown	Vipr2-IRES2-Cre-neo;Ai166_383128-18465	18465	TH_core		0	0	0	35401	0	0	0	0	0	0	0	0	0	0	0	0	0	0	0	0	0	0	0	0	0	0	0	0	0	0	0	0	0	0	0	0	0	0	0
18465_00092	6943.9	3375.6	4144.27	LD	VPM	unknown	Vipr2-IRES2-Cre-neo;Ai166_383128-18465	18465	TH_core		0	0	0	22733.6	0	0	0	0	0	0	939.062	0	0	0	0	0	0	0	0	0	0	0	0	0	0	0	0	0	0	0	0	0	0	0	0	0	0	0	0
18465_00106	6815.77	4026.65	3411.27	VPM	VPL	unknown	Vipr2-IRES2-Cre-neo;Ai166_383128-18465	18465	TH_core		0	0	0	0	5679.55	0	0	2218.81	0	10097.6	0	0	0	0	0	0	0	0	0	0	0	0	0	0	0	0	0	0	0	0	0	0	0	0	0	0	0	0	0
18465_00109	7152.9	3050.73	3318.93	LGd	LGd	unknown	Vipr2-IRES2-Cre-neo;Ai166_383128-18465	18465	TH_core		0	0	0	0	0	0	0	0	0	0	0	0	0	0	0	179.862	0	0	0	529.544	24885.2	0	719.986	219.463	0	0	0	0	0	0	0	0	0	0	0	4696.05	247.365	0	0
18465_00110	7079.52	3138.88	3335.88	LGd	LGd	unknown	Vipr2-IRES2-Cre-neo;Ai166_383128-18465	18465	TH_core		0	0	0	0	0	0	0	0	0	0	0	0	0	0	0	0	0	0	0	0	27013.3	159.712	458.791	0	0	0	0	0	0	0	0	0	0	0	0	5101.07	1134.4	0	0
18465_00111	7204.67	2995.55	3302.43	LGd	LGd	unknown	Vipr2-IRES2-Cre-neo;Ai166_383128-18465	18465	TH_core		0	0	0	0	0	0	0	0	0	0	0	0	0	0	0	148.746	269.638	0	0	562.934	13386.6	0	0	309.418	129.933	0	0	0	0	0	0	0	0	0	0	16606.6	2731.88	0	0
18465_00112	7336.1	2944.07	3392.48	LGd	LGd	unknown	Vipr2-IRES2-Cre-neo;Ai166_383128-18465	18465	TH_core		0	0	0	0	0	0	0	0	0	0	0	0	0	0	0	0	0	69.8954	0	123.939	27734	0	0	0	0	0	0	0	0	0	0	0	0	0	0	1366.83	0	0	0
18465_00113	7519.55	2916.3	3525.12	LGd	LGd	unknown	Vipr2-IRES2-Cre-neo;Ai166_383128-18465	18465	TH_core		0	0	0	0	0	0	0	0	0	0	0	0	0	0	199.872	179.765	149.899	0	0	509.639	26431.2	0	0	279.737	29.9816	0	0	0	0	0	0	0	0	0	0	0	0	0	0
18465_00114	7352.98	2994.2	3421.93	LGd	LGd	unknown	Vipr2-IRES2-Cre-neo;Ai166_383128-18465	18465	TH_core		0	0	0	0	0	0	0	0	0	0	0	0	0	0	0	0	0	0	0	0	45978.4	0	0	0	0	0	0	0	0	0	0	0	0	0	0	0	0	0	0
18465_00115	7349.62	3016.45	3357.15	LGd	LGd	unknown	Vipr2-IRES2-Cre-neo;Ai166_383128-18465	18465	TH_core		0	0	0	0	0	0	0	0	0	0	0	0	0	0	0	0	0	0	0	0	28174.5	0	0	0	0	0	0	0	0	0	0	0	0	0	0	0	0	0	0
18465_00116	7376.52	3058.32	3280.62	LGd	LGd	unknown	Vipr2-IRES2-Cre-neo;Ai166_383128-18465	18465	TH_core		0	0	0	0	0	0	0	0	0	0	0	0	0	0	0	0	0	0	0	0	39657.5	0	298.452	0	0	0	0	0	0	0	0	0	0	0	0	0	0	0	0
18465_00117	7494.48	3007.35	3397.43	LGd	LGd	unknown	Vipr2-IRES2-Cre-neo;Ai166_383128-18465	18465	TH_core		0	0	0	0	0	0	0	0	0	0	0	0	0	0	0	0	0	0	0	0	30525.5	0	339.715	0	0	0	0	0	0	0	0	0	0	0	0	459.339	0	0	0
18465_00119	7927.3	3067.93	3565.9	LGd	LGd	unknown	Vipr2-IRES2-Cre-neo;Ai166_383128-18465	18465	TH_core		0	0	0	0	0	0	0	0	0	0	0	0	0	0	249.668	369.184	0	139.861	0	519.387	21243	0	0	89.8392	0	0	0	0	0	0	0	0	0	0	0	0	0	0	0
18465_00125	7040.05	3786.8	3753.25	VPM	VPM	unknown	Vipr2-IRES2-Cre-neo;Ai166_383128-18465	18465	TH_core		0	0	0	17178.2	13804.6	0	0	0	0	0	454.653	0	0	0	0	0	0	0	0	0	0	0	0	0	0	0	0	0	0	0	0	0	0	0	0	0	0	0	0
18465_00126	7282.7	3265.98	3327.55	LGd	VPM	unknown	Vipr2-IRES2-Cre-neo;Ai166_383128-18465	18465	TH_core		0	0	0	0	1396.41	0	0	0	0	0	618.34	0	0	0	0	0	0	0	0	0	0	0	0	0	0	0	0	0	0	0	0	0	0	0	0	0	0	0	0
18465_00127	7091.35	3675.3	3437.52	VPM	VPM	unknown	Vipr2-IRES2-Cre-neo;Ai166_383128-18465	18465	TH_core		0	0	0	0	17662.2	0	0	0	0	0	0	0	0	0	0	0	0	0	0	0	0	0	0	0	0	0	0	0	0	0	0	0	0	0	0	0	0	0	0
18465_00128	6897.62	3946.95	3546.07	VPM	VPM	unknown	Vipr2-IRES2-Cre-neo;Ai166_383128-18465	18465	TH_core		0	0	0	0	22769.7	0	0	0	0	705.126	1133.58	0	0	0	0	0	0	0	0	0	0	0	0	0	0	0	0	0	0	0	0	0	0	0	0	0	0	0	0
18465_00132	7543.6	3459.05	3678	VPM	VPM	unknown	Vipr2-IRES2-Cre-neo;Ai166_383128-18465	18465	TH_core		0	0	0	0	19674.5	0	0	0	0	0	329.041	0	0	0	0	0	0	0	0	0	0	0	0	0	0	0	0	0	0	0	0	0	0	0	0	0	0	0	0
18465_00133	7240.35	3495.18	3395.25	fiber tracts	VPM	unknown	Vipr2-IRES2-Cre-neo;Ai166_383128-18465	18465	TH_core		0	0	0	0	23960.9	0	0	0	0	0	22047.7	0	0	0	0	0	0	0	0	0	0	0	0	0	0	0	0	0	0	0	0	0	0	0	0	0	0	0	0
18465_00136	7714.7	3145.48	3537.12	LGd	LGd	unknown	Vipr2-IRES2-Cre-neo;Ai166_383128-18465	18465	TH_core		0	0	0	0	149.886	0	0	0	0	0	0	0	0	0	0	0	0	0	606.323	0	30148.1	0	389.714	0	0	0	0	0	0	0	0	0	0	0	0	0	0	0	59.7298
18465_00140	8017.2	3618	3140.82	LGd	LGd	unknown	Vipr2-IRES2-Cre-neo;Ai166_383128-18465	18465	TH_core		0	0	0	0	0	0	0	0	0	0	0	0	0	0	0	109.767	0	629.883	0	243.79	18109.1	0	0	0	0	0	0	0	0	0	0	0	0	0	0	0	0	0	0
18465_00141	7663.8	3242.93	3398.4	LGd	LGd	unknown	Vipr2-IRES2-Cre-neo;Ai166_383128-18465	18465	TH_core		0	0	0	0	0	0	0	0	0	0	0	0	0	0	0	0	0	279.695	29.9975	359.784	36386.6	0	408.416	0	0	0	0	0	0	0	0	0	0	0	0	0	0	0	849.434
18465_00142	7632.67	3288.38	3514.75	LGd	VPM	unknown	Vipr2-IRES2-Cre-neo;Ai166_383128-18465	18465	TH_core		0	0	0	0	2303.29	0	0	0	0	0	7712.61	0	0	728.214	789.022	437.566	0	10114.7	0	0	0	0	0	0	0	0	0	0	0	0	0	0	0	0	0	0	0	0	0
18465_00145	8846.2	3583.3	3238.95	MG	MG	unknown	Vipr2-IRES2-Cre-neo;Ai166_383128-18465	18465	TH_core		0	0	0	0	0	0	0	0	0	0	0	0	0	0	8587.94	318.441	17665.1	0	0	0	0	0	0	0	266.788	0	0	0	0	0	0	0	0	0	0	0	0	0	0
18465_00146	8879.25	3625.07	3152.43	MG	MG	unknown	Vipr2-IRES2-Cre-neo;Ai166_383128-18465	18465	TH_core		0	0	0	0	0	0	0	0	0	0	0	0	0	0	237.58	289.992	12152.1	0	0	0	0	0	0	0	39.9349	0	0	0	0	0	0	0	0	0	0	0	0	0	0
18465_00148	7609.52	3370.8	2971.05	fiber tracts	LGd	unknown	Vipr2-IRES2-Cre-neo;Ai166_383128-18465	18465	TH_core		0	0	0	0	0	0	0	0	0	0	0	0	0	0	0	0	0	0	0	0	3667.32	0	0	0	0	0	0	0	0	0	0	0	0	0	0	5495.22	4820.85	0	0
18465_00152	8857.45	3722.25	3122.2	unknown	MG	unknown	Vipr2-IRES2-Cre-neo;Ai166_383128-18465	18465	TH_core		0	0	0	0	0	0	0	0	0	0	0	0	0	0	246.605	289.933	11390.9	0	0	0	0	0	0	0	39.9432	0	0	0	0	0	0	0	0	0	0	0	0	0	0
18465_00154	4764.25	4884.15	2794.08	CP	CP	unknown	Vipr2-IRES2-Cre-neo;Ai166_383128-18465	18465	CP_GPe		0	0	0	0	0	0	0	0	0	0	0	0	0	0	0	0	0	0	0	0	0	0	0	0	0	0	0	0	0	0	0	0	69.0881	0	0	0	0	0	0
18465_00155	6092.2	4796.75	2302.2	CP	CP	unknown	Vipr2-IRES2-Cre-neo;Ai166_383128-18465	18465	CP_GPe		0	0	0	0	0	0	0	0	0	0	0	0	0	0	0	0	0	0	0	0	0	0	0	0	0	0	0	0	0	0	0	0	0	0	0	0	0	0	0
18465_00156	5142.1	4321.35	2792.53	CP	CP	unknown	Vipr2-IRES2-Cre-neo;Ai166_383128-18465	18465	CP_GPe		0	0	0	0	0	0	0	0	0	0	0	0	0	0	0	0	0	0	0	0	0	0	0	0	0	0	0	0	0	0	0	0	0	0	0	0	0	0	0
18465_00157	5088.88	4582.75	2878.8	CP	CP	unknown	Vipr2-IRES2-Cre-neo;Ai166_383128-18465	18465	CP_SNr		0	0	0	0	0	0	0	0	0	0	0	0	0	0	0	0	0	0	0	0	0	0	0	0	0	0	0	0	0	0	0	0	0	0	0	0	0	0	0
18465_00159	5526.12	4904.23	2317.42	CP	CP	unknown	Vipr2-IRES2-Cre-neo;Ai166_383128-18465	18465	CP_GPe		0	0	0	0	0	0	0	0	0	0	0	0	0	0	0	0	0	0	0	0	0	0	0	0	0	0	0	0	0	0	0	0	0	0	0	0	0	0	0
18465_00161	5237.38	5432.08	2601.08	CP	EPd	unknown	Vipr2-IRES2-Cre-neo;Ai166_383128-18465	18465			0	0	0	0	0	0	0	0	0	0	0	0	0	0	0	0	0	0	0	0	0	0	0	0	0	0	0	0	0	0	0	0	0	0	0	0	0	0	0
18465_00168	3732.8	5442.85	4005.92	EPd	CP	unknown	Vipr2-IRES2-Cre-neo;Ai166_383128-18465	18465	CP_SNr		0	0	0	0	0	0	0	0	0	0	0	0	0	0	0	0	0	0	0	0	0	0	0	0	0	0	0	0	0	0	0	0	0	0	0	0	0	0	0
18465_00175	6556.83	4344.2	4160.7	VPM	VPM	unknown	Vipr2-IRES2-Cre-neo;Ai166_383128-18465	18465	TH_core		0	686.499	0	0	0	0	41993.4	1849.35	0	0	0	0	0	0	0	0	0	0	0	0	0	0	0	0	0	0	0	0	0	0	0	0	0	0	0	0	0	0	0
18465_00177	6643.88	4608.6	4001.3	VPM	VPL	unknown	Vipr2-IRES2-Cre-neo;Ai166_383128-18465	18465	TH_core	large arbor, single	0	4103.29	0	0	0	29.9546	335.387	40598.3	0	0	0	0	0	0	0	0	0	0	0	0	0	0	0	0	0	0	0	0	0	0	0	0	0	0	0	0	0	0	0
18465_00199	4153.55	6401.08	4370.9	ACB	ACB	unknown	Vipr2-IRES2-Cre-neo;Ai166_383128-18465	18465			0	0	0	0	0	0	0	0	0	0	0	0	0	0	0	0	0	0	0	0	0	0	0	0	0	0	0	0	0	0	0	0	0	0	0	0	0	0	0
18465_00203	3549.2	5909.67	5155	AON	ACB	unknown	Vipr2-IRES2-Cre-neo;Ai166_383128-18465	18465			0	0	0	0	0	0	0	0	0	0	0	0	0	0	0	0	0	0	0	0	0	0	0	0	0	0	0	0	0	0	0	0	0	0	0	0	0	0	0
18465_00204	3480.9	6069.62	4907.95	AON	ACB	unknown	Vipr2-IRES2-Cre-neo;Ai166_383128-18465	18465			0	0	0	0	0	0	0	0	0	0	0	0	0	0	0	0	0	0	0	0	0	0	0	0	0	0	0	0	0	0	0	0	0	0	0	0	0	0	0
18465_00205	3976.32	6053.33	5017.2	ACB	ACB	unknown	Vipr2-IRES2-Cre-neo;Ai166_383128-18465	18465			0	0	0	0	0	0	0	0	0	0	0	0	0	0	0	0	0	0	0	0	0	0	0	0	0	0	0	0	0	0	0	0	0	0	0	0	0	0	0
18465_00206	4298.23	5541.17	4544.23	fiber tracts	ACB	unknown	Vipr2-IRES2-Cre-neo;Ai166_383128-18465	18465			0	0	0	0	0	0	0	0	0	0	0	0	0	0	0	0	0	0	0	0	0	0	0	0	0	0	0	0	0	0	0	0	0	0	0	0	0	0	0
18465_00207	4117.27	5722.45	4988.08	ACB	ACB	unknown	Vipr2-IRES2-Cre-neo;Ai166_383128-18465	18465			0	0	0	0	0	0	0	0	0	0	0	0	0	0	0	0	0	0	0	0	0	0	0	0	0	0	0	0	0	0	0	0	0	0	0	0	0	0	0
18465_00209	3366.85	6516.08	4718.95	OT	OT	unknown	Vipr2-IRES2-Cre-neo;Ai166_383128-18465	18465			0	0	0	0	0	0	0	0	0	0	0	0	0	0	0	0	0	0	0	0	0	0	0	0	0	0	0	0	0	0	0	0	0	0	0	0	0	0	0
18465_00213	4488.1	6691.55	4094.42	SI	SI	unknown	Vipr2-IRES2-Cre-neo;Ai166_383128-18465	18465			0	0	0	0	0	0	0	0	0	0	0	0	0	0	0	0	0	0	0	0	0	0	0	0	0	0	0	0	0	0	0	0	0	0	0	0	0	0	0
18465_00219	6801.58	4360.08	2088.1	CP	CP	unknown	Vipr2-IRES2-Cre-neo;Ai166_383128-18465	18465	CP_SNr		0	0	0	0	0	0	0	0	0	0	0	0	0	0	0	0	0	0	0	0	0	0	0	0	0	0	0	0	0	0	0	0	0	0	0	0	0	0	0
18465_00226	7293.8	4112.83	3298.25	VPL	VPL	unknown	Vipr2-IRES2-Cre-neo;Ai166_383128-18465	18465	TH_core		0	0	0	0	2063.59	69.772	0	139.663	19727.8	29.9945	625.944	0	0	0	0	0	0	0	295.986	0	0	0	0	0	0	0	0	0	0	0	0	0	0	0	0	417.422	0	0	12663.6
18465_00227	7028.8	3983.88	3370.9	VPM	VPM	unknown	Vipr2-IRES2-Cre-neo;Ai166_383128-18465	18465	TH_core		0	0	0	0	26068.1	0	0	0	0	19.9956	1368.09	0	0	0	0	0	0	0	0	0	0	0	0	0	0	0	0	0	0	0	0	0	0	0	0	0	0	0	0
18465_00228	6878.25	4130.45	3503.15	VPM	VPM	unknown	Vipr2-IRES2-Cre-neo;Ai166_383128-18465	18465	TH_core		0	0	0	99.6693	2663.04	79.9665	0	14847.7	119.718	1748.56	0	0	0	0	0	0	0	0	0	0	0	0	0	0	0	0	0	0	0	0	0	0	0	0	0	0	0	0	0
18465_00229	7337.7	3545.3	3498.73	fiber tracts	VPM	unknown	Vipr2-IRES2-Cre-neo;Ai166_383128-18465	18465	TH_core		0	0	0	0	0	0	0	0	0	0	8327.07	0	0	36269.6	0	0	0	0	0	0	0	0	0	0	0	0	0	0	0	0	0	0	0	0	0	0	0	0	0
18465_00230	7134.6	3689.4	3592.35	VPM	VPM	unknown	Vipr2-IRES2-Cre-neo;Ai166_383128-18465	18465	TH_core	small arbor, double	0	0	0	0	12019.7	0	0	0	0	0	1756.2	0	0	0	0	0	0	0	0	0	0	0	0	0	0	0	0	0	0	0	0	0	0	0	0	0	0	0	0
18465_00233	7179.27	4024.35	3437.08	VPM	VPM	unknown	Vipr2-IRES2-Cre-neo;Ai166_383128-18465	18465	TH_core		0	0	0	0	4380.56	0	0	5620.66	14772.5	2675.43	1814.27	0	0	0	0	0	0	0	0	0	0	0	0	0	0	0	0	0	0	0	0	0	0	0	0	0	0	0	0
18465_00234	7451.52	3781.85	3460.35	VPM	VPM	unknown	Vipr2-IRES2-Cre-neo;Ai166_383128-18465	18465	TH_core		0	0	0	0	0	0	0	0	0	0	1962.69	0	0	1755.02	389.14	0	2313.77	0	147.16	0	1780.51	0	1167.11	0	0	0	0	0	0	0	0	0	0	0	0	0	0	0	11410.3
18465_00235	6812.05	4498.75	3446.52	fiber tracts	VPL	unknown	Vipr2-IRES2-Cre-neo;Ai166_383128-18465	18465	TH_core		0	494.222	0	886.231	293.942	29042.4	0	1813.92	0	298.959	0	0	0	0	0	0	0	0	0	0	0	0	0	0	0	0	0	0	0	0	0	0	0	0	0	0	0	0	0
18465_00238	7397.7	4108.3	3521.95	VPM	VPL	unknown	Vipr2-IRES2-Cre-neo;Ai166_383128-18465	18465	TH_core		0	2431.01	0	0	2601.79	27535.5	0	1913.89	3752.73	468.952	8124.64	0	79.6201	0	0	0	7243.87	0	0	0	0	0	0	0	0	0	0	0	0	0	0	0	0	0	0	209.452	0	0	0
18465_00241	6696.73	3936.48	3870.38	VPM	VPM	unknown	Vipr2-IRES2-Cre-neo;Ai166_383128-18465	18465	TH_core		0	0	0	28482.1	1512.17	0	739.971	0	0	0	0	0	0	0	0	0	0	0	0	0	0	0	0	0	0	0	0	0	0	0	0	0	0	0	0	0	0	0	0
18465_00242	7009.5	4373.52	3794.65	VPM	VPL	unknown	Vipr2-IRES2-Cre-neo;Ai166_383128-18465	18465	TH_core		0	1540.13	0	1573.19	0	0	0	31236.1	0	1077.74	79.7961	0	0	0	0	0	0	0	0	0	0	0	0	0	0	0	0	0	0	0	0	0	0	0	0	0	0	0	0
18465_00243	6855.48	4061.73	4117.27	VPM	VPM	unknown	Vipr2-IRES2-Cre-neo;Ai166_383128-18465	18465	TH_core	small arbor, single	0	0	0	385.885	0	0	29840.5	0	0	0	0	0	0	0	0	0	0	0	0	0	0	0	0	0	0	0	0	0	0	0	0	0	0	0	0	0	0	0	0
18465_00245	6851.98	4671.62	4436.6	VPM	VM	unknown	Vipr2-IRES2-Cre-neo;Ai166_383128-18465	18465	TH_matrix		0	72037.9	188.584	4150.08	159.764	1895.42	6406.49	25306.1	0	7494.94	2545.74	0	0	0	0	0	0	0	0	0	0	0	0	0	0	0	0	0	0	0	0	0	0	0	0	0	0	0	0
18465_00246	6821.15	6070.92	3147.8	CEA	CEA	unknown	Vipr2-IRES2-Cre-neo;Ai166_383128-18465	18465			0	0	0	0	0	0	0	0	0	0	0	0	0	0	0	0	0	0	0	0	0	0	0	0	0	0	0	0	0	0	0	0	0	0	0	0	0	0	0
18465_00248	8627.78	5511.73	3399.98	DG	DG	unknown	Vipr2-IRES2-Cre-neo;Ai166_383128-18465	18465			0	0	0	0	0	0	0	0	0	0	0	0	0	0	0	0	0	0	0	0	0	0	0	0	0	0	0	0	0	0	0	0	0	0	0	0	0	0	0
18465_00258	6325.58	4819.65	4874.25	VM	SMT	unknown	Vipr2-IRES2-Cre-neo;Ai166_383128-18465	18465	TH_core	small arbor	0	0	0	0	0	0	0	0	0	0	0	0	0	0	0	0	0	0	0	0	0	0	0	0	0	0	0	0	0	12018.6	0	23049.4	0	0	0	0	0	0	0
18465_00261	6608.38	5005.42	4341.67	VM	VPM	unknown	Vipr2-IRES2-Cre-neo;Ai166_383128-18465	18465	TH_core		0	0	0	6150.76	0	0	12319.1	704.482	0	236.946	0	0	0	0	0	0	0	0	0	0	0	0	0	0	0	0	0	0	0	0	0	0	0	0	0	0	0	0	0
18465_00264	4950.15	4970.9	3415.27	CP	CP	unknown	Vipr2-IRES2-Cre-neo;Ai166_383128-18465	18465	CP_GPe		0	0	0	0	0	0	0	0	0	0	0	0	0	0	0	0	0	0	0	0	0	0	0	0	0	0	0	0	0	0	0	0	0	0	0	0	0	0	0
18465_00281	6191.67	4593.12	1866.53	fiber tracts	CP	unknown	Vipr2-IRES2-Cre-neo;Ai166_383128-18465	18465			0	0	0	0	0	0	0	0	0	0	0	0	1448.54	0	0	0	0	0	0	0	0	0	0	0	0	0	0	0	0	0	0	0	0	96.7588	0	0	0	0	0
18465_00282	5358.5	5193.25	2871.55	CP	CP	unknown	Vipr2-IRES2-Cre-neo;Ai166_383128-18465	18465			0	0	0	0	0	0	0	0	0	0	0	0	0	0	0	0	0	0	0	0	0	0	0	0	0	0	0	0	0	0	0	0	0	0	0	0	0	0	0
18465_00283	5662	5350.25	2501.12	CP	EPd	unknown	Vipr2-IRES2-Cre-neo;Ai166_383128-18465	18465			0	0	0	0	0	0	0	0	0	0	0	0	0	0	0	0	0	0	0	0	0	0	0	0	0	0	0	0	0	0	0	0	0	0	0	0	0	0	0
18465_00285	6893.2	6112.88	2766.62	BLA	BLA	unknown	Vipr2-IRES2-Cre-neo;Ai166_383128-18465	18465			0	0	0	0	0	0	0	0	0	0	0	0	0	0	0	0	0	0	0	0	0	0	0	0	0	0	0	0	0	0	0	0	0	0	0	0	0	0	0
18465_00286	6901.83	4023.7	3708.23	VPM	VPM	unknown	Vipr2-IRES2-Cre-neo;Ai166_383128-18465	18465	TH_core		0	0	0	26371.1	1136.36	0	0	0	0	470.666	0	0	0	0	0	0	0	0	0	0	0	0	0	0	0	0	0	0	0	0	0	0	0	0	0	0	0	0	0
18465_00287	6829.2	4255.17	3845.02	VPM	VPM	unknown	Vipr2-IRES2-Cre-neo;Ai166_383128-18465	18465	TH_core		0	0	0	6017.67	0	0	10737.1	693.305	0	84.7137	0	0	0	0	0	0	0	0	0	0	0	0	0	0	0	0	0	0	0	0	0	0	0	0	0	0	0	0	0
18465_00288	6922.62	4163.67	3870.18	VPM	VPM	unknown	Vipr2-IRES2-Cre-neo;Ai166_383128-18465	18465	TH_core		0	0	0	17307.1	0	0	2222.81	0	0	0	0	0	0	0	0	0	0	0	0	0	0	0	0	0	0	0	0	0	0	0	0	0	0	0	0	0	0	0	0
18465_00291	7746.85	3986.45	4073.82	PO	MG	unknown	Vipr2-IRES2-Cre-neo;Ai166_383128-18465	18465	TH_core		0	0	0	0	0	0	0	0	0	0	38282.7	752.433	10589.7	0	0	0	0	0	0	0	0	0	0	0	0	0	0	0	0	0	0	0	0	0	0	0	0	0	0
18465_00292	7314.08	3758.38	3621.6	VPM	VPM	unknown	Vipr2-IRES2-Cre-neo;Ai166_383128-18465	18465	TH_core		0	0	0	258.515	23014	0	0	0	0	0	4982.9	0	0	0	0	0	0	0	0	0	0	0	0	0	0	0	0	0	0	0	0	0	0	0	0	0	0	0	0
18465_00294	6951.88	4545.3	3642.75	VPL	VPM	unknown	Vipr2-IRES2-Cre-neo;Ai166_383128-18465	18465	TH_core		0	0	0	2332.9	0	0	6054.3	7615.95	0	4302.21	2836.66	0	0	0	0	0	0	0	0	0	0	0	0	0	0	0	0	0	0	0	0	0	0	0	0	0	0	0	0
18465_00300	7949.73	4121.9	3446.05	IntG	MG	unknown	Vipr2-IRES2-Cre-neo;Ai166_383128-18465	18465	TH_core	double targets	0	0	0	0	1715.84	5000.71	0	308.896	19964.7	169.761	460.169	0	0	2971.73	1964.14	1360.86	17732.1	0	0	0	0	0	0	0	0	0	0	0	0	0	0	0	0	0	0	3841.78	0	0	2508.83
18465_00302	8189.65	4122.45	3526.05	MG	MG	unknown	Vipr2-IRES2-Cre-neo;Ai166_383128-18465	18465	TH_core	single target	0	1638.32	0	0	1107.39	9719.24	0	1430.32	69.9888	179.603	2470.23	0	0	18712.1	8710.88	0	12784.4	0	0	0	0	0	0	0	0	0	0	0	0	0	0	0	0	0	0	0	0	0	0
18465_00303	7648.77	4111.15	3789.68	VPM	MG	unknown	Vipr2-IRES2-Cre-neo;Ai166_383128-18465	18465	TH_core	double targets	0	464.478	0	577.183	606.455	0	0	3972.42	0	377.374	58822.6	0	1024.23	603.732	0	0	702.442	0	0	0	0	0	0	0	0	0	0	0	0	0	0	0	0	0	0	0	0	0	0
18465_00304	6856.52	4905.35	4086.3	VPL	VPL	unknown	Vipr2-IRES2-Cre-neo;Ai166_383128-18465	18465	TH_core		0	468.672	0	0	0	0	36037.2	0	0	0	0	0	0	0	0	0	0	0	0	0	0	0	0	0	0	0	0	0	0	0	0	0	0	0	0	0	0	0	0
18465_00305	7009.12	4890.15	3703.68	fiber tracts	VPL	unknown	Vipr2-IRES2-Cre-neo;Ai166_383128-18465	18465	TH_core		0	1225.51	0	1221.61	926.695	0	0	31833.1	0	249.416	5821.88	0	0	0	0	0	0	0	0	0	0	0	0	0	0	0	0	0	0	0	0	0	0	0	0	0	0	0	0
18465_00309	6984.55	6196.12	2879.7	BMA	CEA	unknown	Vipr2-IRES2-Cre-neo;Ai166_383128-18465	18465			0	0	0	0	0	0	0	0	0	0	0	0	0	0	0	0	0	0	0	0	0	0	0	0	0	0	0	0	0	0	0	0	0	0	0	0	0	0	0
18465_00312	8907.1	3658.98	3205.9	MG	MG	unknown	Vipr2-IRES2-Cre-neo;Ai166_383128-18465	18465	TH_core		0	0	0	0	0	0	0	0	0	0	0	0	0	0	2475.43	99.4073	6683.46	0	0	0	0	0	0	0	0	0	0	0	0	0	0	0	0	0	0	0	0	0	0
18465_00313	6737.6	3088.07	4364.08	LD	LD	unknown	Vipr2-IRES2-Cre-neo;Ai166_383128-18465	18465	TH_matrix		0	4422.09	5796.3	0	0	89.6341	0	725.573	0	0	0	0	0	0	0	0	0	0	0	0	0	0	0	0	0	187.425	0	0	0	0	0	0	0	0	0	1291.32	61248.1	3610.67	0
18465_00319	5457.35	3855.9	3762.27	CP	CP	unknown	Vipr2-IRES2-Cre-neo;Ai166_383128-18465	18465	CP_GPe		0	0	0	0	0	0	0	0	0	0	0	0	0	0	0	0	0	0	0	0	0	0	0	0	0	0	0	0	0	0	0	0	0	0	0	0	0	0	0
18465_00328	6847.35	3765.23	3294.35	RT	VPL	unknown	Vipr2-IRES2-Cre-neo;Ai166_383128-18465	18465	TH_core		0	0	0	0	0	0	0	0	9308.33	0	0	0	0	0	0	0	0	0	1394.64	0	319.72	0	329.17	0	0	0	0	0	0	0	0	0	0	0	0	0	0	0	30457.7
18465_00347	7272.12	3959.75	3276.93	VPL	VPL	unknown	Vipr2-IRES2-Cre-neo;Ai166_383128-18465	18465	TH_core		0	0	0	0	2774.08	0	0	992.055	29082.2	39.8268	0	0	0	0	0	0	0	0	0	0	0	0	0	0	0	0	0	0	0	0	0	0	0	0	0	0	0	0	460.02
18465_00348	7483.83	4079.48	3188.8	LGv	VPL	unknown	Vipr2-IRES2-Cre-neo;Ai166_383128-18465	18465			0	0	0	0	0	0	0	0	6579.04	0	623.22	0	0	6303.16	4193.01	176.106	7226.16	1950.11	174.808	0	0	0	0	0	0	0	0	0	0	0	0	0	0	0	0	0	0	0	12249.9
18465_00349	7147.42	4163.48	1855.05	CP	CP	unknown	Vipr2-IRES2-Cre-neo;Ai166_383128-18465	18465	CP_GPe		0	0	0	0	0	0	0	0	0	0	0	0	0	0	0	0	0	0	0	0	0	0	0	0	0	0	0	0	0	0	0	0	0	0	0	0	0	0	0
18470_3227_x19287_y16117	4981.77	2318.75	2949.55	SSp-m	SSp-m	5	Fezf2-CreER;Ai166_378668-18470	18470	CTX_ET		0	1170.73	129.02	0	0	0	3791.35	8320.99	0	377.605	0	0	0	0	0	0	0	0	0	0	0	0	0	0	0	0	0	0	0	0	0	0	0	0	0	0	0	0	0
18470_3582_x22459_y29708	5670.55	971.825	5190.98	MOs	MOs	5	Fezf2-CreER;Ai166_378668-18470	18470	CTX_ET	TPC_sim	0	577.501	15713.6	0	0	0	0	0	0	0	0	0	0	0	0	0	0	0	0	0	0	0	0	0	0	1101.43	0	0	0	0	0	0	0	0	0	1932.64	2312.19	0	0
18470_4630_x23468_y24795	6916.38	691.2	4838.27	RSPd	RSPd	5	Fezf2-CreER;Ai166_378668-18470	18470			0	339.576	1006.7	0	0	972.717	0	119.913	269.566	0	0	0	0	0	0	0	0	0	478.43	0	0	0	0	0	0	6984.73	3075.83	0	0	0	0	0	0	0	0	10065.4	22951.6	10238	507.381
18864_1871_x3272_y21319	2398.95	2063.05	4635.62	MOs	MOs	2/3	Cux2-CreERT2;Ai166_382148-18864	18864	CTX_IT		1841.35	2329.12	60317.8	0	0	0	0	0	0	0	0	249.642	0	0	0	0	0	0	0	0	0	0	0	0	0	0	0	0	0	0	0	0	4876.68	2724.96	159.654	0	0	0	0
18864_1917_x3417_y12763	2339.62	2205.43	4495.35	MOs	MOs	2/3	Cux2-CreERT2;Ai166_382148-18864	18864	CTX_IT		1750.57	6848.94	39693.5	0	0	0	0	0	0	0	0	0	0	0	0	0	0	0	0	0	0	0	0	0	0	0	209.875	0	669.627	219.711	0	0	5318.06	328.929	0	0	0	0	0
18864_2047_x3016_y12128	2529.05	1991.78	4323.23	MOs	MOs	2/3	Cux2-CreERT2;Ai166_382148-18864	18864	CTX_IT		3983.84	0	41597.1	0	0	0	0	0	0	0	0	69.9314	0	0	0	0	0	0	0	0	0	0	0	0	0	168.718	0	688.859	0	178.611	0	0	199.572	0	119.92	0	0	0	0
18864_2086_x2903_y21496	2687.68	1890.7	4563.55	MOs	MOs	2/3	Cux2-CreERT2;Ai166_382148-18864	18864	CTX_IT		1519.68	2746.86	53858.3	0	0	0	0	0	0	0	0	0	0	0	0	0	0	0	0	0	0	0	0	0	0	308.847	0	158.683	0	0	0	0	0	0	0	0	0	0	0
18864_2520_x2913_y22642	3092.07	1802.47	4240.83	MOs	MOs	2/3	Cux2-CreERT2;Ai166_382148-18864	18864	CTX_IT		282.184	9685.28	35852.1	826.328	0	0	968.671	279.904	0	0	0	0	0	0	0	0	0	0	0	0	0	0	0	0	0	0	727.858	0	0	0	0	0	0	0	0	0	0	0	0
18864_3015_x3194_y23588	3826.48	1694.5	3960.33	MOs	MOp	2/3	Cux2-CreERT2;Ai166_382148-18864	18864	CTX_IT		0	17135.6	31370.9	1433.52	0	0	6392.41	872.722	0	29.9647	3179.69	0	0	0	0	0	0	0	0	0	0	0	0	0	0	0	279.543	0	0	0	0	0	0	0	0	0	0	0	0
18864_3248_x2473_y15212	3738.68	1297.95	5013.35	MOs	MOs	2/3	Cux2-CreERT2;Ai166_382148-18864	18864	CTX_IT		6896.19	0	56183	0	0	0	0	0	0	0	0	0	0	0	0	0	0	0	419.843	0	3308.44	0	469.671	0	0	4107.65	479.649	447.545	0	10455.5	0	425.804	1079.28	0	497.675	1767.53	1078.05	0	0
18864_3338_x3396_y21865	4168.17	1672.75	4381.73	MOs	MOp	4	Cux2-CreERT2;Ai166_382148-18864	18864	CTX_IT		0	5194.86	29950.1	0	0	0	0	0	0	0	0	0	0	0	0	0	0	0	0	0	0	0	0	0	0	0	0	0	0	0	0	0	0	0	0	0	0	0	0
18864_3473_x2641_y21082	4091.12	1336.68	4600.7	MOs	MOp	2/3	Cux2-CreERT2;Ai166_382148-18864	18864	CTX_IT		0	3823.77	41094.7	0	3440.54	788.041	0	566.42	0	1373.42	0	0	0	0	0	0	0	0	0	0	0	0	0	0	0	0	10.0016	0	0	0	0	0	0	0	0	0	0	0	0
18864_3488_x3691_y22599	4410.98	1722.65	4168.02	MOp	MOp	4	Cux2-CreERT2;Ai166_382148-18864	18864	CTX_IT		0	19500.5	17438.3	0	0	0	0	1902.1	0	0	0	321.195	0	0	0	0	0	0	0	0	0	0	0	0	0	0	0	0	0	0	0	0	157.383	0	0	0	0	0	0
18864_3494_x2380_y13749	4024.9	1146.35	4598.2	MOs	MOp	2/3	Cux2-CreERT2;Ai166_382148-18864	18864	CTX_IT		0	98.095	32548	0	0	0	0	0	0	0	0	0	0	0	0	0	0	0	0	0	0	0	0	0	0	537.263	109.521	370.046	4354.74	0	1123.46	956.577	416.594	2175.17	414.816	0	0	0	0
18864_3772_x5344_y6871	4637.25	2361.57	2725.93	SSp-m	SSp-m	4	Cux2-CreERT2;Ai166_382148-18864	18864	CTX_IT		0	1151.91	0	0	0	0	24834.5	12127.6	0	0	0	0	0	0	0	0	0	0	0	0	0	0	0	0	0	0	0	0	0	0	0	0	0	0	0	0	0	0	0
18864_4067_x3464_y21495	4816	1401.8	4553.8	MOp	MOp	4	Cux2-CreERT2;Ai166_382148-18864	18864	CTX_IT		0	21982.1	22032.5	0	0	919.974	0	0	0	0	0	0	0	0	0	0	0	0	0	0	0	0	0	0	0	137.917	0	0	0	0	0	0	0	0	0	0	0	0	0
18864_4120_x3320_y13563	4664.08	1306	4594.33	MOs	MOp	2/3	Cux2-CreERT2;Ai166_382148-18864	18864	CTX_IT		0	7985.97	31735.5	0	0	5384.81	0	1308.42	0	0	0	0	0	0	0	0	0	0	0	0	0	0	0	0	0	1348.37	0	379.655	0	0	0	0	0	0	0	0	878.2	0	0
18864_4157_x3358_y13741	4681.05	1307.47	4641.65	MOs	MOp	2/3	Cux2-CreERT2;Ai166_382148-18864	18864	CTX_IT		0	11098.7	23297.3	0	0	2147.25	0	1418.21	0	0	0	0	0	0	0	0	0	0	0	0	0	0	0	0	0	1808.49	0	0	0	0	0	0	0	0	0	0	2709.53	1536.95	0
18864_4267_x2794_y21031	4919.1	1045.15	4721.38	MOs	MOs	2/3	Cux2-CreERT2;Ai166_382148-18864	18864	CTX_IT		0	14381.7	39960	0	0	161.658	0	0	0	0	0	0	0	0	0	0	0	0	0	0	0	0	0	0	0	39.6862	0	0	0	0	0	0	0	0	0	179.957	338.133	0	0
18864_4380_x6371_y4940	5263.15	2487.57	2132.48	SSp-n	SSp-n	4	Cux2-CreERT2;Ai166_382148-18864	18864	CTX_IT		0	0	0	17408	0	0	14868.4	39.4023	0	1489.97	0	0	0	0	0	0	0	0	0	0	0	0	0	0	0	0	0	0	0	0	0	0	0	0	0	0	0	0	0
18864_4420_x4377_y8261	5181.05	1675.28	3304.27	SSp-ul	SSp-ul	4	Cux2-CreERT2;Ai166_382148-18864	18864	CTX_IT		0	1217.74	0	0	0	1479.57	0	27208.6	0	0	0	0	0	0	0	0	0	0	0	0	0	0	0	0	0	0	0	0	0	0	0	0	0	0	0	0	0	0	0
18864_4429_x7945_y3080	5362.3	2970.9	1470.97	SSp-n	SSs	2/3	Cux2-CreERT2;Ai166_382148-18864	18864	CTX_IT		0	0	0	10406.9	0	0	9657.26	0	0	0	15671.8	1603.5	209.357	0	0	0	0	0	0	0	0	0	0	0	0	0	0	0	0	0	0	0	0	0	0	0	0	0	0
18864_4554_x9386_y2232	5661.2	3460.43	1174.45	SSs	SSs	2/3	Cux2-CreERT2;Ai166_382148-18864	18864	CTX_IT		0	0	0	0	0	0	458.859	0	0	0	46235.6	0	1642.39	0	0	0	0	0	0	0	0	0	0	0	0	0	0	0	0	0	0	0	0	4374.04	0	0	0	0	0
18864_4693_x10912_y2095	5701.12	3987.55	1302.32	SSs	SSs	4	Cux2-CreERT2;Ai166_382148-18864	18864	CTX_IT		0	79.2457	0	0	0	636.216	696.175	0	0	0	35184.1	556.906	1353.47	0	0	0	0	0	0	0	0	0	0	0	0	0	0	0	0	0	0	0	0	0	0	0	0	0	0
18864_4760_x3070_y21249	5551.45	942.125	4726.23	MOp	MOp	2/3	Cux2-CreERT2;Ai166_382148-18864	18864	CTX_IT		0	33346.9	5148.06	0	0	6030.73	0	0	3489.26	0	0	0	0	0	0	0	0	0	29.7857	0	765.82	0	29.99	0	0	0	99.8327	0	0	0	0	0	0	0	0	1436.23	0	0	791.343
18864_4797_x9453_y2359	5939.52	3417.98	1278.18	SSs	SSs	2/3	Cux2-CreERT2;Ai166_382148-18864	18864	CTX_IT		0	30884.6	0	734.578	0	0	2429.45	545.362	0	0	48510.2	458.184	2837.71	0	0	0	119.673	0	0	0	0	0	0	0	0	0	0	0	0	0	0	0	0	0	0	0	0	0	0
18864_5030_x9347_y31359	6330.67	3218.15	1351.2	SSs	SSs	2/3	Cux2-CreERT2;Ai166_382148-18864	18864	CTX_IT		0	25240	28.5604	1207.38	0	1744.55	79.8427	2794.98	0	179.679	40503.5	156.778	78.4809	0	0	0	0	0	0	0	0	0	0	0	0	0	0	0	0	0	0	0	0	0	0	0	0	0	0
18864_5099_x6368_y29941	6137.33	2129.82	1944.62	SSp-bfd	SSp-bfd	4	Cux2-CreERT2;Ai166_382148-18864	18864	CTX_IT		0	129.902	0	13602.6	29097.9	289.09	0	0	0	0	2721.24	0	0	0	0	0	0	0	0	0	0	0	0	0	0	0	0	0	0	0	0	0	0	0	0	0	0	0	0
18864_5242_x9483_y31549	6571.35	3182.57	1300.7	SSs	AUDd	4	Cux2-CreERT2;Ai166_382148-18864	18864			0	9326.2	3677.95	409.28	1503.45	3617.65	79.8002	718.846	0	196.418	44511.3	0	359.182	982.667	97.6487	0	1235.77	0	0	0	0	0	0	0	0	0	0	0	0	0	0	0	0	0	0	0	0	0	0
18864_5305_x7877_y31450	6631.35	2539.45	1278.1	SSs	SSs	2/3	Cux2-CreERT2;Ai166_382148-18864	18864	CTX_IT		0	4812.39	79.6908	1647.58	7537.56	899.451	289.804	737.48	0	59.7544	43550.2	0	5303.56	129.643	0	0	2514.83	0	0	0	0	0	0	1056.28	0	0	0	0	0	0	0	0	0	0	0	0	0	9.94699	0
18864_5444_x7352_y31475	6730	2294.32	1274.8	SSs	SSs	2/3	Cux2-CreERT2;Ai166_382148-18864	18864	CTX_IT		0	0	0	19.5122	17237	0	0	0	0	0	23272.6	0	49.7826	0	0	0	0	0	0	0	0	0	0	0	0	0	0	0	0	0	0	0	0	157.138	0	0	0	0	0
18864_5637_x5637_y31619	8266.42	782.125	2944.25	VISp	VISp	2/3	Cux2-CreERT2;Ai166_382148-18864	18864			0	0	0	0	0	0	0	0	0	0	0	0	0	0	0	0	0	0	179.915	0	36019.8	0	509.083	0	0	0	0	0	0	0	0	0	0	0	0	369.908	289.835	49.7618	783.313
18864_5648_x4839_y28849	6782.8	1329.03	2243.85	SSp-bfd	SSp-bfd	2/3	Cux2-CreERT2;Ai166_382148-18864	18864	CTX_IT		0	0	0	0	34125.6	0	0	1068.49	1381.8	455.115	0	0	0	0	0	0	0	0	0	0	0	0	0	0	0	0	0	0	0	0	0	0	0	0	0	268.945	230.204	9.99826	0
18864_5692_x8806_y3272	6968.35	2873.5	1650.53	SSs	AUDd	5	Cux2-CreERT2;Ai166_382148-18864	18864			0	8618.98	694.209	0	4283.85	4096.85	0	1506.55	555.048	934.598	30728.6	0	143.023	6665.74	5070.22	0	1097.79	239.226	0	0	0	0	0	0	0	0	0	0	0	0	0	0	0	0	0	0	0	0	0
18864_6057_x8520_y2391	7661.02	2665.43	1105.45	AUDp	AUDp	2/3	Cux2-CreERT2;Ai166_382148-18864	18864			0	0	0	0	0	0	0	0	0	0	2583.12	0	69.9257	8936	41145.7	6951.81	6385.05	139.488	0	0	0	0	0	229.254	0	0	0	0	0	0	0	0	0	0	0	0	0	0	0
18864_6074_x3503_y13192	6826.35	547.525	4849.05	RSPd	RSPd	2/3	Cux2-CreERT2;Ai166_382148-18864	18864			0	0	1966.55	0	0	0	0	0	0	0	0	0	0	0	0	0	0	0	159.994	0	1783.61	0	948.994	0	0	2316.67	2950	0	0	0	0	0	0	0	0	11347	14446.2	399.047	289.789
18864_6104_x9372_y1806	7802.52	2947.25	908.275	AUDp	AUDp	2/3	Cux2-CreERT2;Ai166_382148-18864	18864			0	0	0	0	299.308	0	0	0	0	0	3633.47	0	0	3712.88	35260.3	0	3181.37	209.328	511.556	0	288.997	0	339.601	0	59.9347	0	0	0	0	0	0	0	0	0	0	339.203	218.73	0	0
18864_6139_x4843_y27122	7418.08	1160.7	2824.5	VISrl	VISp	4	Cux2-CreERT2;Ai166_382148-18864	18864			0	0	0	0	19027.4	0	0	39.9069	1800.94	248.701	0	0	0	0	0	0	0	0	219.153	0	0	0	0	0	0	0	0	0	0	0	0	0	0	0	0	0	0	0	1388.04
18864_6291_x8873_y32149	7865.2	2579.73	977.5	AUDp	AUDp	2/3	Cux2-CreERT2;Ai166_382148-18864	18864			0	0	0	0	0	0	0	0	0	0	584.372	0	0	3747.65	30346.2	1001.68	6246.27	1907.77	89.8552	19.1201	584.625	0	525.66	1883.97	0	0	0	0	0	0	0	0	0	0	0	179.855	0	0	0
18864_6321_x4387_y7047	7007.55	982.65	2878.4	SSp-bfd	VISp	2/3	Cux2-CreERT2;Ai166_382148-18864	18864			0	0	0	0	18363.2	1151.66	0	1955.87	2084.03	509.066	687.486	0	0	2230.73	0	0	0	3101.95	0	2411.67	7580.04	0	2201.73	1931.38	926.423	0	0	0	0	0	0	0	0	0	0	0	0	0	3687.98
18864_6384_x3409_y13059	6982.75	465.025	4861.88	RSPd	RSPd	2/3	Cux2-CreERT2;Ai166_382148-18864	18864			0	0	0	0	0	0	0	0	0	0	0	0	0	0	0	0	0	0	129.025	0	6066.92	0	895.095	0	0	0	0	0	0	0	0	0	0	0	0	5486.03	23362	960.856	0
18864_6581_x10729_y2199	8646.72	3318.77	1038.35	AUDv	TEa	5	Cux2-CreERT2;Ai166_382148-18864	18864			0	0	0	0	287.845	0	0	0	0	0	4250.06	0	0	10804.7	18907.9	2980.97	22429.3	5957.71	0	4008.47	9499.14	0	39.9602	1831.47	59.0778	0	0	0	0	0	0	0	0	0	0	499.994	0	0	0
18864_6733_x9057_y31875	8507	2482.55	1083.8	AUDp	AUDp	2/3	Cux2-CreERT2;Ai166_382148-18864	18864			0	0	0	0	0	0	0	0	0	0	808.495	0	0	2480.01	34107.6	5097.34	8986.23	0	0	974.597	1867.26	19.9713	0	411.347	308.435	0	0	0	0	0	0	0	0	0	0	0	0	0	0
18864_6734_x4899_y27447	7922.8	957.975	2729.88	VISrl	VISp	4	Cux2-CreERT2;Ai166_382148-18864	18864			0	0	0	0	0	0	0	0	0	0	0	0	0	0	0	0	0	0	2104.49	0	23499.2	0	1018.04	0	0	0	0	0	0	0	0	0	0	0	0	6054.19	0	0	230.045
18864_6805_x6340_y4681	8255.4	1531.78	1879.43	VISal	VISl	2/3	Cux2-CreERT2;Ai166_382148-18864	18864			0	0	0	0	0	0	0	0	0	0	846.438	0	0	2242.75	3525.52	951.33	0	21776.9	340.214	1326.42	480.8	0	399.644	774.75	534.92	0	0	0	0	0	0	0	0	0	0	338.002	249.306	59.3477	0
18864_6821_x5144_y6844	7952.85	1108.5	2710.2	VISrl	VISp	4	Cux2-CreERT2;Ai166_382148-18864	18864			0	0	0	0	8715.57	49.7908	0	1069.5	6012.11	19.6627	0	0	0	0	0	0	0	918.012	7625.67	542.659	6469.89	0	389.908	0	0	0	0	0	0	0	0	0	0	0	0	8803.89	58.8626	0	3895.08
18864_6956_x8154_y30811	8871.5	2130.5	1523.4	TEa	VISpor	2/3	Cux2-CreERT2;Ai166_382148-18864	18864			0	0	0	0	0	0	0	0	0	0	277.571	0	0	4744.56	10424.2	9114.74	169.422	420.467	0	1222.02	2549.28	0	0	6201.57	356.665	0	0	0	0	0	0	0	0	0	0	19.9965	0	0	0
18867_2903_x13633_y8787	3396.9	2841.62	3731.2	MOs	MOp	5	Pvalb-T2A-CreERT2;Ai166_394528-18867	18867	CTX_ET	TPC_com	0	4012.47	14506.2	0	0	0	0	0	0	0	0	0	0	0	0	0	0	0	0	0	0	0	0	0	0	0	0	0	0	0	0	0	281.763	0	0	0	0	0	0
18867_3383_x10177_y11497	3976.1	3784.3	2559.25	SSp-m	SSp-m	5	Pvalb-T2A-CreERT2;Ai166_394528-18867	18867	CTX_ET	TPC_sim	0	9165.56	1945.88	0	0	0	3149.38	0	0	0	285.165	1235.42	694.134	0	0	0	0	0	0	0	0	0	0	0	0	0	0	0	0	0	0	0	0	718.568	0	0	0	0	0
18867_3469_x10058_y10954	4048.32	3365.25	2809.62	MOp	MOp	6a	Pvalb-T2A-CreERT2;Ai166_394528-18867	18867			0	9661.29	1305.1	0	0	0	3120.07	0	0	0	1070.67	0	0	0	0	0	0	0	0	0	0	0	0	0	0	0	0	0	0	0	0	0	0	0	0	0	0	0	0
18867_3525_x9958_y10743	4180.35	3490.88	2490.35	SSp-m	SSp-m	5	Pvalb-T2A-CreERT2;Ai166_394528-18867	18867	CTX_ET	TPC_sim	0	1567.56	0	0	0	0	8314.6	0	0	0	0	0	0	0	0	0	0	0	0	0	0	0	0	0	0	0	0	0	0	0	0	0	0	0	0	0	0	0	0
18867_3758_x14594_y6944	4647.7	2043.72	4096.3	MOp	MOp	5	Pvalb-T2A-CreERT2;Ai166_394528-18867	18867	CTX_ET	TPC_com	0	8323.34	6343.11	0	0	0	0	0	0	0	0	9.99622	0	0	0	0	0	0	0	0	0	0	0	0	0	0	0	0	0	0	0	0	0	0	0	0	0	0	0
18867_3801_x9223_y10977	4429.2	3384.38	2508.75	SSp-m	SSp-m	6a	Pvalb-T2A-CreERT2;Ai166_394528-18867	18867			0	10.0016	0	0	0	0	7755.24	0	0	0	0	19.9919	0	0	0	0	0	0	0	0	0	0	0	0	0	0	0	0	0	0	0	0	0	0	0	0	0	0	0
18867_3807_x9130_y11820	4479.65	3719.52	2437.08	SSp-m	SSp-m	6a	Pvalb-T2A-CreERT2;Ai166_394528-18867	18867			0	0	0	0	0	0	5289.43	0	0	0	478.85	0	0	0	0	0	0	0	0	0	0	0	0	0	0	0	0	0	0	0	0	0	0	0	0	0	0	0	0
18867_3832_x10338_y8748	4470.58	2618.55	2853.62	SSp-m	SSp-m	5	Pvalb-T2A-CreERT2;Ai166_394528-18867	18867	CTX_ET		0	483.725	0	0	0	0	4652.55	0	0	0	0	0	0	0	0	0	0	0	0	0	0	0	0	0	0	0	0	0	0	0	0	0	0	0	0	0	0	0	0
18867_3855_x11412_y8044	4678.35	2473.95	3014.03	SSp-m	SSp-m	5	Pvalb-T2A-CreERT2;Ai166_394528-18867	18867	CTX_ET	TPC_com	0	5642.75	2445.93	279.367	0	0	3820.61	5931.77	0	0	888.233	1287.43	162.364	0	0	0	0	0	0	0	0	0	0	0	0	0	0	0	0	0	0	0	477.924	0	0	0	0	0	0
18867_3926_x8710_y12751	4694.52	4231.25	2040.78	SSs	SSs	5	Pvalb-T2A-CreERT2;Ai166_394528-18867	18867	CTX_ET	TPC_sim	0	0	0	0	0	0	1784.53	0	0	0	5789.42	3796.11	0	0	0	0	0	0	0	0	0	0	0	0	0	0	0	0	0	0	0	0	59.8814	149.679	0	0	0	0	0
18867_3973_x31634_y12362	4918.62	4208	1954.68	SSs	SSs	5	Pvalb-T2A-CreERT2;Ai166_394528-18867	18867	CTX_ET	TPC_sim	0	0	0	0	0	0	0	0	0	0	5609.89	59.5333	0	0	0	0	0	0	0	0	0	0	0	0	0	0	0	0	0	0	0	0	0	0	0	0	0	0	0
18867_3994_x27846_y7437	5014.95	2202.15	3281.77	SSp-ul	SSp-ul	5	Pvalb-T2A-CreERT2;Ai166_394528-18867	18867	CTX_ET	TPC_sim	0	6783.56	0	0	0	0	125.113	17401.6	0	0	0	0	0	0	0	0	0	0	0	0	0	0	0	0	0	0	0	0	0	0	0	0	0	0	0	0	0	0	0
18867_4052_x9852_y8712	4700.38	2603.85	2691.55	SSp-m	SSp-m	5	Pvalb-T2A-CreERT2;Ai166_394528-18867	18867	CTX_ET		0	0	0	0	0	0	7277.84	0	0	0	0	0	0	0	0	0	0	0	0	0	0	0	0	0	0	0	0	0	0	0	0	0	0	0	0	0	0	0	0
18867_4156_x9348_y9148	4792.7	2749.7	2560.05	SSp-m	SSp-m	5	Pvalb-T2A-CreERT2;Ai166_394528-18867	18867	CTX_ET		0	0	0	0	0	0	8897.87	0	0	0	0	0	0	0	0	0	0	0	0	0	0	0	0	0	0	0	0	0	0	0	0	0	0	0	0	0	0	0	0
18867_4202_x26848_y7080	5287.08	2022.88	3629.2	SSp-ul	SSp-ul	5	Pvalb-T2A-CreERT2;Ai166_394528-18867	18867	CTX_ET	TPC_sim	0	3023.27	0	0	0	207.54	0	8218.92	0	0	0	0	0	0	0	0	0	0	0	0	0	0	0	0	0	0	0	0	0	0	0	0	0	0	0	0	0	0	0
18867_4216_x9933_y8365	5070.75	2580	2497.53	SSp-m	SSp-m	5	Pvalb-T2A-CreERT2;Ai166_394528-18867	18867	CTX_ET	TPC_sim	0	2504.74	0	0	0	0	7542.21	209.832	0	0	0	0	0	0	0	0	0	0	0	0	0	0	0	0	0	0	0	0	0	0	0	0	0	0	0	0	0	0	0
18867_4218_x8269_y11914	5031.88	3892.65	1899.65	SSs	SSs	5	Pvalb-T2A-CreERT2;Ai166_394528-18867	18867	CTX_ET	TPC_sim	0	1774.03	1356.35	0	0	0	4640.87	0	0	0	9409.96	0	0	0	0	0	0	0	0	0	0	0	0	0	0	0	0	0	0	0	0	0	0	302.855	0	0	0	0	0
18867_4259_x9977_y8313	5130.35	2562.5	2520.1	SSp-m	SSp-m	5	Pvalb-T2A-CreERT2;Ai166_394528-18867	18867	CTX_ET	TPC_sim	0	0	0	129.855	0	0	3445.06	0	0	0	0	0	0	0	0	0	0	0	0	0	0	0	0	0	0	0	0	0	0	0	0	0	0	0	0	0	0	0	0
18867_4296_x31171_y9797	5298.83	3174.62	2136.27	SSp-m	SSp-m	5	Pvalb-T2A-CreERT2;Ai166_394528-18867	18867	CTX_ET	TPC_sim	0	5373.59	1913.75	389.108	0	0	11612.3	149.666	0	0	1162.98	0	0	0	0	0	0	0	0	0	0	0	0	0	0	0	0	0	0	0	0	0	0	0	0	0	0	0	0
18867_4302_x30805_y9233	5336.83	2947.9	2260.68	SSp-m	SSp-m	5	Pvalb-T2A-CreERT2;Ai166_394528-18867	18867	CTX_ET	TPC_sim	0	1396.82	0	551.259	0	0	3144.36	0	0	0	0	0	434.658	0	0	0	0	0	0	0	0	0	0	0	0	0	0	0	0	0	0	0	0	19.416	0	0	0	0	0
18867_4330_x29413_y7746	5393.85	2320.1	2764.88	SSp-un	SSp-m	5	Pvalb-T2A-CreERT2;Ai166_394528-18867	18867	CTX_ET	TPC_com	0	0	0	2704.8	0	0	942.619	269.481	0	4393.15	0	0	0	0	0	0	0	0	0	0	0	0	0	0	0	0	0	0	0	0	0	0	0	0	0	0	0	0	0
18867_4336_x10280_y7972	5231.75	2435.12	2623.78	SSp-m	SSp-m	5	Pvalb-T2A-CreERT2;Ai166_394528-18867	18867	CTX_ET	TPC_sim	0	0	0	459.001	0	0	4370.55	0	0	672.884	0	0	0	0	0	0	0	0	0	0	0	0	0	0	0	0	0	0	0	0	0	0	0	0	0	0	0	0	0
18867_4392_x7633_y13301	5099.65	4252.42	1864.65	SSs	SSs	5	Pvalb-T2A-CreERT2;Ai166_394528-18867	18867	CTX_ET		0	0	0	0	0	0	0	0	0	0	6556.67	219.494	0	0	0	0	0	0	0	0	0	0	0	0	0	0	0	0	0	0	0	0	0	205.864	0	0	0	0	0
18867_4397_x8352_y9768	5239.75	3085.35	1953.1	SSp-m	SSp-m	5	Pvalb-T2A-CreERT2;Ai166_394528-18867	18867	CTX_ET	TPC_sim	0	0	0	370.284	0	0	5445.03	0	0	0	276.91	0	0	0	0	0	0	0	0	0	0	0	0	0	0	0	0	0	0	0	0	0	0	0	0	0	0	0	0
18867_4421_x31775_y9812	5354.88	3083	1928.38	SSp-m	SSp-m	5	Pvalb-T2A-CreERT2;Ai166_394528-18867	18867	CTX_ET		0	0	0	923.203	0	0	7324.52	0	0	0	204.655	0	0	0	0	0	0	0	0	0	0	0	0	0	0	0	0	0	0	0	0	0	0	0	0	0	0	0	0
18867_4457_x7592_y10554	5144.17	3202.18	1947	SSp-m	SSp-m	5	Pvalb-T2A-CreERT2;Ai166_394528-18867	18867	CTX_ET		0	1146.78	197.707	749.961	0	0	10802.5	0	0	0	1076.2	0	0	0	0	0	0	0	0	0	0	0	0	0	0	0	0	0	0	0	0	0	0	0	0	0	0	0	0
18867_4473_x25161_y6054	5539.15	1588.1	4155.08	MOp	SSp-ll	5	Pvalb-T2A-CreERT2;Ai166_394528-18867	18867	CTX_ET	TPC_sim	0	7370.66	338.359	0	0	983.868	0	461.156	0	0	0	0	0	0	0	0	0	0	0	0	0	0	0	0	0	0	0	0	0	0	0	0	0	0	0	0	0	0	0
18867_4513_x27588_y6824	5627.8	1926.28	3404.7	SSp-ul	SSp-ul	5	Pvalb-T2A-CreERT2;Ai166_394528-18867	18867	CTX_ET	TPC_com	0	5075.53	0	0	0	208.591	0	10878.6	0	0	0	0	0	0	0	0	0	0	0	0	0	0	0	0	0	0	0	0	0	0	0	0	0	0	0	0	0	0	0
18867_4533_x14227_y15937	5484.55	5271.95	4012.02	CP	CP	unknown	Pvalb-T2A-CreERT2;Ai166_394528-18867	18867			0	0	0	0	0	0	0	0	0	0	0	0	0	0	0	0	0	0	0	0	0	0	0	0	0	0	0	0	0	0	0	0	0	0	0	0	0	0	0
18867_4554_x26130_y14869	5685.38	4982.05	3763.25	GPe	CP	unknown	Pvalb-T2A-CreERT2;Ai166_394528-18867	18867			0	0	0	0	0	0	0	0	0	0	0	0	0	0	0	0	0	0	0	0	0	0	0	0	0	0	0	0	0	0	0	0	0	0	0	0	0	0	0
18867_4593_x26568_y15120	5736.42	5065.05	3647.55	GPe	CP	unknown	Pvalb-T2A-CreERT2;Ai166_394528-18867	18867			0	0	0	0	0	0	0	0	0	0	0	0	0	0	0	0	0	0	0	0	0	0	0	0	0	0	0	0	0	0	0	0	0	0	0	0	0	0	0
18867_4605_x30309_y8068	5726.42	2438.85	2467.88	SSp-n	SSp-n	5	Pvalb-T2A-CreERT2;Ai166_394528-18867	18867	CTX_ET	TPC_sim	0	0	0	10571.7	29.9807	0	0	0	0	29.931	97.0572	0	0	0	0	0	0	0	0	0	0	0	0	0	0	0	0	0	0	0	0	0	0	0	0	0	0	0	0
18867_4621_x24147_y14734	5735.67	4909	4354.73	fiber tracts	RT	unknown	Pvalb-T2A-CreERT2;Ai166_394528-18867	18867			0	0	0	0	0	0	0	0	0	0	0	0	0	0	0	0	0	0	0	0	0	0	0	0	0	0	0	0	0	0	0	0	0	0	0	0	0	0	0
18867_4647_x12409_y6656	5632.12	1969.62	3327.05	SSp-ul	SSp-ul	5	Pvalb-T2A-CreERT2;Ai166_394528-18867	18867	CTX_ET	TPC_sim	0	100.295	0	0	0	228.941	0	8849.22	0	29.8934	0	0	0	0	0	0	0	0	0	0	0	0	0	0	0	0	0	0	0	0	0	0	0	0	0	0	0	0	0
18867_4677_x24410_y14710	5812.8	4899.35	4271.88	fiber tracts	RT	unknown	Pvalb-T2A-CreERT2;Ai166_394528-18867	18867			0	0	0	0	0	0	0	0	0	0	0	0	0	0	0	0	0	0	0	0	0	0	0	0	0	0	0	0	0	0	0	0	0	0	0	0	0	0	0
18867_4689_x11723_y7039	5662.73	2093.25	3109.03	SSp-ul	SSp-ul	5	Pvalb-T2A-CreERT2;Ai166_394528-18867	18867	CTX_ET	TPC_sim	0	1960.61	0	0	0	39.5447	0	9958.22	0	2001.87	347.884	129.613	0	0	0	0	0	0	0	0	0	0	0	0	0	0	0	0	0	0	0	0	0	0	0	0	0	0	0
18867_4724_x12558_y16835	5852.73	5583.4	3379	unknown	CP	unknown	Pvalb-T2A-CreERT2;Ai166_394528-18867	18867	CP_SNr		0	0	0	0	0	0	0	0	0	0	0	0	0	0	0	0	0	0	0	0	0	0	0	0	0	0	0	0	0	0	0	0	0	0	0	0	0	0	0
18867_4768_x26326_y6150	5879.58	1662.5	3808.7	SSp-ll	SSp-ul	5	Pvalb-T2A-CreERT2;Ai166_394528-18867	18867	CTX_ET	TPC_com	0	2014.14	0	0	0	8175.75	0	2818.72	0	89.3141	0	0	0	0	0	0	0	0	0	0	0	0	0	0	0	0	0	0	0	0	0	0	0	0	0	0	0	0	0
18867_4776_x28359_y6621	5919.08	1869.18	3154	SSp-ul	SSp-un	5	Pvalb-T2A-CreERT2;Ai166_394528-18867	18867	CTX_ET	TPC_sim	0	3871.51	2416.81	0	0	0	0	9383.92	0	2219.19	0	0	0	0	0	0	0	0	0	0	0	0	0	0	0	0	0	0	0	0	0	0	0	0	0	0	0	0	0
18867_4789_x23709_y15765	5886.02	5248.5	4510.4	unknown	RT	unknown	Pvalb-T2A-CreERT2;Ai166_394528-18867	18867			0	0	0	0	0	0	0	0	0	0	0	0	0	0	0	0	0	0	0	0	0	0	0	0	0	0	0	0	0	0	0	0	0	0	0	0	0	0	0
18867_4801_x7068_y12938	5707.65	4254.4	1463.42	SSs	SSs	5	Pvalb-T2A-CreERT2;Ai166_394528-18867	18867	CTX_ET	TPC_sim	0	0	0	0	0	0	0	0	0	0	7116.45	341.008	703.273	0	0	0	0	0	0	0	0	0	0	0	0	0	0	0	0	0	0	0	0	384.473	0	0	0	0	0
18867_4817_x16327_y15739	5816.92	5219.65	4618.3	BST	RT	unknown	Pvalb-T2A-CreERT2;Ai166_394528-18867	18867			0	0	0	0	0	0	0	0	0	0	0	0	0	0	0	0	0	0	0	0	0	0	0	0	0	0	0	0	0	0	0	0	0	0	0	0	0	0	0
18867_4824_x31628_y8902	5961.98	2765.85	2016.93	SSp-n	SSp-n	5	Pvalb-T2A-CreERT2;Ai166_394528-18867	18867	CTX_ET	TPC_sim	0	0	0	6972.92	0	0	0	0	0	0	0	0	0	0	0	0	0	0	0	0	0	0	0	0	0	0	0	0	0	0	0	0	0	38.6049	0	0	0	0	0
18867_4826_x11914_y16564	5966.9	5478.85	3176.03	CP	CP	unknown	Pvalb-T2A-CreERT2;Ai166_394528-18867	18867	CP_SNr		0	0	0	0	0	0	0	0	0	0	0	0	0	0	0	0	0	0	0	0	0	0	0	0	0	0	0	0	0	0	0	0	0	0	0	0	0	0	0
18867_4831_x27808_y6496	5824.77	1618.45	3382.88	SSp-ul	SSp-ul	5	Pvalb-T2A-CreERT2;Ai166_394528-18867	18867	CTX_ET		0	0	0	0	1533.33	963.45	0	9456.99	0	428.4	565.285	0	0	0	0	0	0	0	0	0	0	0	0	0	0	0	0	0	0	0	0	0	0	0	0	0	0	0	0
18867_4874_x16831_y16618	5966.15	5569.83	4696.1	unknown	RT	unknown	Pvalb-T2A-CreERT2;Ai166_394528-18867	18867			0	0	0	0	0	0	0	0	0	0	0	0	0	0	0	0	0	0	0	0	0	0	0	0	0	0	0	0	0	0	0	0	0	0	0	0	0	0	0
18867_4889_x28329_y6770	6055.05	1946.22	3171.62	SSp-un	SSp-un	5	Pvalb-T2A-CreERT2;Ai166_394528-18867	18867	CTX_ET	TPC_sim	0	3379.62	8868.11	0	855.545	0	0	4589.17	0	3216.36	162.191	0	0	0	0	0	0	0	0	0	0	0	0	0	0	10.0013	0	0	0	0	0	0	0	0	0	0	0	0	0
18867_4922_x30354_y7405	6106	2167.07	2476.93	SSp-bfd	SSp-bfd	5	Pvalb-T2A-CreERT2;Ai166_394528-18867	18867	CTX_ET	TPC_sim	0	0	0	1517.04	6220.64	0	0	0	0	78.8887	0	0	0	0	0	0	0	0	0	0	0	0	0	0	0	0	0	0	0	0	0	0	0	0	0	0	0	0	0
18867_4926_x25796_y14504	6124.48	4809.08	3869.88	unknown	RT	unknown	Pvalb-T2A-CreERT2;Ai166_394528-18867	18867			0	0	0	0	0	0	0	0	0	0	0	0	0	0	0	0	0	0	0	0	0	0	0	0	0	0	0	0	0	0	0	0	0	0	0	0	0	0	0
18867_4954_x9860_y7599	5929.9	2281.25	2488.33	SSp-n	SSp-bfd	5	Pvalb-T2A-CreERT2;Ai166_394528-18867	18867	CTX_ET	TPC_com	0	5817.05	4077.94	10366	2145.47	148.468	0	865.821	0	259.078	0	0	0	0	0	0	0	0	0	0	0	0	0	0	0	0	0	0	0	0	0	0	0	0	0	0	0	0	0
18867_4957_x30093_y7560	6149.6	2232.27	2560.68	SSp-bfd	SSp-n	5	Pvalb-T2A-CreERT2;Ai166_394528-18867	18867	CTX_ET	TPC_sim	0	718.867	1914.34	2492.85	6280.31	49.9589	0	431.794	0	1763.97	921.838	0	0	0	0	0	0	0	0	0	0	0	0	0	0	0	0	0	0	0	0	0	0	0	0	0	0	0	0
18867_4984_x30860_y8156	6180.52	2457.25	2291.1	SSp-bfd	SSp-n	5	Pvalb-T2A-CreERT2;Ai166_394528-18867	18867	CTX_ET	TPC_sim	0	0	0	4006.55	2693.52	0	0	0	0	0	0	0	0	0	0	0	0	0	0	0	0	0	0	0	0	0	0	0	0	0	0	0	0	0	0	0	0	0	0
18867_5082_x26232_y14941	6295.27	4937.95	3752.75	unknown	RT	unknown	Pvalb-T2A-CreERT2;Ai166_394528-18867	18867			0	0	0	0	0	0	0	0	0	0	0	0	0	0	0	0	0	0	0	0	0	0	0	0	0	0	0	0	0	0	0	0	0	0	0	0	0	0	0
18867_5083_x14145_y15212	6148.15	4980.12	3995.98	fiber tracts	RT	unknown	Pvalb-T2A-CreERT2;Ai166_394528-18867	18867			0	0	0	0	0	0	0	0	0	0	0	0	0	0	0	0	0	0	0	0	0	0	0	0	0	0	0	0	0	0	0	0	0	0	0	0	0	0	0
18867_5169_x12576_y5864	6188.95	1703.25	3364.92	SSp-ul	SSp-ul	5	Pvalb-T2A-CreERT2;Ai166_394528-18867	18867	CTX_ET	TPC_sim	0	625.212	0	0	2039.57	2894.63	0	8571.33	0	1865.33	0	0	0	0	0	0	0	0	0	0	0	0	0	0	0	0	0	0	0	0	0	0	0	0	0	0	0	0	0
18867_5194_x29530_y6807	6403.23	1987.38	2765.35	SSp-bfd	SSp-bfd	6a	Pvalb-T2A-CreERT2;Ai166_394528-18867	18867			0	0	0	98.9502	20803.8	0	0	99.5242	0	1644.02	0	0	0	0	0	0	0	0	0	0	0	0	0	0	0	0	0	0	0	0	0	0	0	0	0	0	0	0	0
18867_5203_x10027_y7237	6032.62	1991.72	2849.15	SSp-bfd	SSp-bfd	5	Pvalb-T2A-CreERT2;Ai166_394528-18867	18867	CTX_ET		0	0	0	1507.46	7340.01	0	228.82	0	0	1399.47	0	0	0	0	0	0	0	0	0	0	0	0	0	0	0	0	0	0	0	0	0	0	0	0	0	0	0	0	0
18867_5287_x32054_y8614	6547.7	2668.48	1879.35	SSs	SSp-n	5	Pvalb-T2A-CreERT2;Ai166_394528-18867	18867	CTX_ET	TPC_sim	0	0	0	1215.19	3042.42	0	0	0	0	0	6365.38	0	106.581	0	0	0	0	0	0	0	0	0	0	0	0	0	0	0	0	0	0	0	0	129.542	0	0	0	0	0
18867_5319_x14289_y4114	6367.02	914.6	3888.73	SSp-ll	MOp	2/3	Pvalb-T2A-CreERT2;Ai166_394528-18867	18867			0	0	0	0	0	34410.9	0	0	8256.04	0	0	0	0	0	0	0	0	0	0	0	0	0	0	0	0	0	0	0	0	0	0	0	0	0	0	0	0	0	0
18867_5408_x30554_y7318	6660.75	2198.35	2402.35	SSp-bfd	SSp-bfd	5	Pvalb-T2A-CreERT2;Ai166_394528-18867	18867	CTX_ET	TPC_sim	0	0	0	0	5315.62	0	0	0	0	0	0	0	0	0	0	0	0	0	0	0	0	0	0	0	0	0	0	0	0	0	0	0	0	0	0	0	0	0	0
18867_5486_x20836_y5690	6523.3	1163.25	5318.25	RSPv	RSPv	5	Pvalb-T2A-CreERT2;Ai166_394528-18867	18867			0	0	1559.2	0	2915.66	99.8258	0	1296.9	389.591	0	0	0	0	0	0	0	0	0	208.13	0	583.331	0	0	0	0	2269.47	1086.63	0	0	0	0	0	0	0	0	0	2692.64	15266.3	2798.62
18867_5640_x21236_y5683	6708.17	1181.45	5198.7	RSPv	RSPv	5	Pvalb-T2A-CreERT2;Ai166_394528-18867	18867			0	149.095	3216.71	0	0	457.58	0	0	0	0	0	0	0	0	0	0	0	0	0	1771.13	5359.22	249.59	368.867	289.127	467.537	1231.72	589.453	0	0	0	0	0	0	0	0	537.961	8376.6	28681.3	0
18867_5654_x12080_y5724	6713.5	1653.2	3205.03	SSp-bfd	SSp-un	5	Pvalb-T2A-CreERT2;Ai166_394528-18867	18867	CTX_ET	TPC_sim	0	0	0	546.468	9633.78	0	0	329.305	658.6	1255.2	0	0	0	0	0	0	0	0	0	0	0	0	0	0	0	0	0	0	0	0	0	0	0	0	0	0	0	0	580.815
18867_5665_x20882_y6561	6831.05	1499.05	5327	RSPv	RSPv	5	Pvalb-T2A-CreERT2;Ai166_394528-18867	18867			0	0	219.613	0	0	519.138	0	10.0013	0	0	0	0	0	0	0	0	0	0	0	0	0	0	0	0	0	1295.19	1194.47	0	0	0	0	0	0	0	0	0	871.95	12201.4	0
18867_5867_x21009_y6208	7147.33	1611.78	5403.25	fiber tracts	RSPv	5	Pvalb-T2A-CreERT2;Ai166_394528-18867	18867		TPC_sim	0	0	332.192	0	0	0	0	0	0	0	0	0	0	0	0	0	0	105.05	5413.82	329.196	1091.2	0	793.484	617.603	0	3773.63	249.417	0	0	0	0	0	0	0	0	0	7983.8	18678.5	89.8505
18867_5894_x10157_y6463	7015.88	1886	2604.2	SSp-bfd	SSp-bfd	5	Pvalb-T2A-CreERT2;Ai166_394528-18867	18867	CTX_ET	TPC_sim	0	0	0	0	6278.99	0	0	0	0	0	0	0	0	0	0	0	0	0	0	0	0	0	0	0	0	0	0	0	0	0	0	0	0	0	0	0	0	0	0
18867_5942_x29015_y5711	7212.88	1631.5	3013.32	SSp-bfd	SSp-bfd	5	Pvalb-T2A-CreERT2;Ai166_394528-18867	18867	CTX_ET	TPC_sim	0	0	0	0	3963.92	0	0	0	498.858	0	0	0	0	0	0	0	0	0	0	0	0	0	0	0	0	0	0	0	0	0	0	0	0	0	0	0	0	0	0
18867_6003_x18592_y6204	7276.35	1660.78	5348.38	fiber tracts	RSPv	5	Pvalb-T2A-CreERT2;Ai166_394528-18867	18867		TPC_sim	0	0	0	0	0	0	0	0	0	0	0	0	0	0	0	0	0	460.705	514.734	667.864	1724.42	0	1589.1	1363.54	0	815.715	1960.97	688.982	19.9904	0	9.99937	390.836	0	0	0	0	482.463	13564.8	1127.21
18867_6007_x18415_y4843	7227	1001.92	5250.05	RSPv	RSPv	5	Pvalb-T2A-CreERT2;Ai166_394528-18867	18867		TPC_sim	0	0	0	0	0	0	0	0	0	0	0	0	0	0	0	0	0	0	0	552.308	1079.55	117.276	0	0	0	0	816.955	0	0	0	0	0	0	0	0	258.305	2388.85	32356.2	0
18867_6014_x17935_y4434	7219.35	868.475	5105.58	RSPd	RSPd	5	Pvalb-T2A-CreERT2;Ai166_394528-18867	18867		TPC_sim	0	0	991.736	0	0	0	0	0	0	0	0	0	0	0	0	0	0	0	10.0049	0	0	0	0	0	0	9663	2052.86	0	0	0	0	0	0	0	0	563.465	24781.1	25304.3	0
18867_6085_x20833_y6331	7397.88	1673	5458.5	fiber tracts	RSPv	5	Pvalb-T2A-CreERT2;Ai166_394528-18867	18867		TPC_sim	0	0	0	0	0	0	0	0	0	0	0	0	0	0	0	0	0	0	0	0	0	0	0	0	0	0	7570.12	0	0	0	0	0	0	0	0	0	364.314	21920	0
18867_6091_x30186_y6043	7399.42	1802.22	2615.07	SSp-bfd	SSp-bfd	5	Pvalb-T2A-CreERT2;Ai166_394528-18867	18867	CTX_ET	TPC_sim	0	0	0	0	11135.3	0	0	0	0	0	1241.81	0	0	75.3622	249.031	0	0	199.649	0	0	148.535	0	0	0	0	0	0	0	0	0	0	0	0	0	0	0	0	0	0
18867_6408_x9343_y6158	7648.8	1720.6	2318.67	SSp-bfd	SSp-bfd	5	Pvalb-T2A-CreERT2;Ai166_394528-18867	18867	CTX_ET	TPC_sim	0	0	0	0	7863.67	0	62.6293	0	0	0	564.211	0	0	354.586	0	0	0	628.653	0	0	0	0	0	0	0	0	0	0	0	0	0	0	0	0	0	0	0	0	0
18867_6413_x20950_y6015	7774.38	1478.03	5431.88	RSPv	RSPv	5	Pvalb-T2A-CreERT2;Ai166_394528-18867	18867		TPC_sim	0	0	0	0	0	0	0	0	0	0	0	0	0	0	0	0	0	0	0	0	0	0	0	0	0	0	3584.42	0	0	0	0	0	0	0	0	0	1960.88	19260.7	0
18867_6452_x16339_y18318	7803.23	6032.62	4523.08	LHA	BST	unknown	Pvalb-T2A-CreERT2;Ai166_394528-18867	18867			0	0	0	0	0	0	0	0	0	0	0	0	0	0	0	0	0	0	0	0	0	0	0	0	0	0	0	0	0	0	0	0	0	0	0	0	0	0	0
18867_6468_x21532_y7741	7891.05	2188.52	5264.35	SUB	SUB	unknown	Pvalb-T2A-CreERT2;Ai166_394528-18867	18867			0	0	0	0	0	0	0	0	0	0	0	0	0	0	0	0	0	0	0	0	0	0	0	0	0	0	0	0	0	0	0	0	0	0	0	0	29.9162	3863.09	0
18867_6985_x12525_y4095	8334.38	837.45	3376.9	VISp	VISp	2/3	Pvalb-T2A-CreERT2;Ai166_394528-18867	18867			0	0	0	0	0	0	0	0	0	0	0	0	0	0	0	0	0	0	0	0	50755.5	0	59.8979	0	0	0	0	0	0	0	0	0	0	0	0	0	0	0	0
18867_6986_x31479_y5932	8520.6	1830.47	2124.1	VISal	VISl	5	Pvalb-T2A-CreERT2;Ai166_394528-18867	18867			0	0	0	0	0	0	0	0	0	0	0	0	0	0	0	0	0	9863.13	0	24138.9	0	0	0	267.626	0	0	0	0	0	0	0	0	0	0	0	0	0	0	0
18867_7123_x11808_y5131	8524.85	1293.9	3182.78	VISp	VISp	5	Pvalb-T2A-CreERT2;Ai166_394528-18867	18867			0	0	0	0	0	0	0	0	0	0	0	0	0	0	0	0	0	0	0	0	20428.4	0	0	0	0	0	0	0	0	0	0	0	0	0	0	0	0	0	0
18867_7172_x22280_y4802	8676.95	951.625	5082.8	RSPv	RSPv	5	Pvalb-T2A-CreERT2;Ai166_394528-18867	18867			0	0	0	0	0	0	0	0	0	0	0	0	0	0	0	0	0	0	0	0	0	0	0	0	0	0	0	0	0	0	0	0	0	0	0	0	2461.01	16463.2	0
18867_7390_x9887_y4961	8853.78	1195.65	2392.88	VISp	VISp	2/3	Pvalb-T2A-CreERT2;Ai166_394528-18867	18867			0	0	0	0	0	0	0	0	0	0	0	0	0	0	0	0	0	0	0	158.324	43459.2	0	0	0	0	0	0	0	0	0	0	0	0	0	0	0	0	0	0
18867_7541_x13210_y4462	9080.7	979	3620.15	VISp	VISp	5	Pvalb-T2A-CreERT2;Ai166_394528-18867	18867			0	0	0	0	0	0	0	0	0	0	0	0	0	0	0	0	0	0	0	0	17518.5	0	0	0	0	0	0	0	0	0	0	0	0	0	0	0	0	0	0
18867_7583_x22567_y18119	9474.22	5941.67	4821.48	PRNr	PRNr	unknown	Pvalb-T2A-CreERT2;Ai166_394528-18867	18867			0	0	0	0	0	0	0	0	0	0	0	0	0	0	0	0	0	0	0	0	0	0	0	0	0	0	0	0	0	0	0	0	0	0	0	0	0	0	0
18867_7584_x10560_y5816	9130.53	1586.97	2763	VISp	VISp	5	Pvalb-T2A-CreERT2;Ai166_394528-18867	18867			0	0	0	0	0	0	0	0	0	0	0	0	0	0	0	0	0	0	0	69.8292	18986	0	0	0	0	0	0	0	0	0	0	0	0	0	0	0	0	0	0
18867_7790_x21511_y18480	9695.62	6046.38	5168.5	TRN	TRN	unknown	Pvalb-T2A-CreERT2;Ai166_394528-18867	18867			0	0	0	0	0	0	0	0	0	0	0	0	0	0	0	0	0	0	0	0	0	0	0	0	0	0	0	0	0	0	0	0	0	0	0	0	0	0	0
18867_7924_x22262_y16755	9872.95	5468.95	4945.85	PRNr	PRNr	unknown	Pvalb-T2A-CreERT2;Ai166_394528-18867	18867			0	0	0	0	0	0	0	0	0	0	0	0	0	0	0	0	0	0	0	0	0	0	0	0	0	0	0	0	0	0	0	0	0	0	0	0	0	0	0
18867_8235_x25208_y14610	10290.3	4826.75	3987.07	SUT	PB	unknown	Pvalb-T2A-CreERT2;Ai166_394528-18867	18867			0	0	0	0	0	0	0	0	0	0	0	0	0	0	0	0	0	0	0	0	0	0	0	0	0	0	0	0	0	0	0	0	0	0	0	0	0	0	0
18868_2225_x15897_y10006	2592.62	3135.48	5046.05	ORBvl	ORBvl	5	Pvalb-T2A-CreERT2;Ai166_396476-18868	18868			1908.66	0	0	0	0	0	0	0	0	0	0	0	0	0	0	0	0	0	0	0	0	0	0	0	0	0	0	829.097	0	0	5385.83	12252.3	0	0	0	0	0	0	0
18868_2559_x15436_y13207	3076.23	4088.88	4924.65	ORBvl	ORBvl	2/3	Pvalb-T2A-CreERT2;Ai166_396476-18868	18868			0	0	469.134	0	0	0	0	0	0	0	0	0	0	0	0	0	0	0	0	0	0	0	0	0	0	2035.35	0	529.307	0	1983.03	508.862	5512.57	0	0	101.725	0	0	0	0
18868_2584_x14386_y13639	3073.25	4233.67	4608.12	unknown	ORBl	1	Pvalb-T2A-CreERT2;Ai166_396476-18868	18868			0	0	0	0	0	0	0	0	0	0	0	0	0	0	0	0	0	0	0	0	0	0	0	0	0	0	0	0	0	9936.93	0	1326.19	0	0	208.637	0	0	0	0
18868_2593_x15801_y13755	3118.62	4270.48	5031.52	ORBvl	ORBvl	2/3	Pvalb-T2A-CreERT2;Ai166_396476-18868	18868			0	0	0	0	0	0	0	0	0	0	0	0	0	0	0	0	0	0	0	0	0	0	0	0	0	0	0	0	0	109.527	381.468	5533.76	0	0	0	0	0	0	0
18868_2601_x23273_y17306	3248.73	5509.17	4075.05	PIR	PIR	unknown	Pvalb-T2A-CreERT2;Ai166_396476-18868	18868			0	0	0	0	0	0	0	0	0	0	0	0	0	0	0	0	0	0	0	0	0	0	0	0	0	0	0	0	0	0	0	0	0	0	0	0	0	0	0
18868_2621_x11765_y8944	3100	2671.9	3795.35	MOs	MOs	5	Pvalb-T2A-CreERT2;Ai166_396476-18868	18868	CTX_ET	TPC_com	0	8637.63	18162.7	0	0	0	1180.82	0	0	0	0	631.289	0	0	0	0	0	0	0	0	0	0	0	0	0	0	0	0	0	0	0	0	0	0	0	0	0	0	0
18868_2924_x10668_y9719	3505.75	2917.6	3466.98	MOp	MOp	5	Pvalb-T2A-CreERT2;Ai166_396476-18868	18868			0	16733.5	10278.1	0	0	0	0	0	0	0	0	0	0	0	0	0	0	0	0	0	0	0	0	0	0	0	0	0	0	0	0	0	0	0	0	0	0	0	0
18868_3009_x28076_y11485	3778.25	3511.2	2586.07	MOp	MOp	5	Pvalb-T2A-CreERT2;Ai166_396476-18868	18868	CTX_ET	TPC_com	0	11861.2	2887.86	0	0	0	1067.51	0	0	0	0	0	0	0	0	0	0	0	0	0	0	0	0	0	0	0	0	0	0	0	0	0	0	0	0	0	0	0	0
18868_3112_x27714_y10534	3908.18	3167.45	2774.98	MOp	MOp	5	Pvalb-T2A-CreERT2;Ai166_396476-18868	18868	CTX_ET	TPC_sim	0	8712.06	4416.95	0	0	0	3429.53	0	0	0	735.668	0	0	0	0	0	0	0	0	0	0	0	0	0	0	0	0	0	0	0	0	0	0	0	0	0	0	0	0
18868_3207_x27726_y9448	4031.5	2763.98	2832.48	MOp	SSp-m	5	Pvalb-T2A-CreERT2;Ai166_396476-18868	18868	CTX_ET	TPC_sim	0	11692.2	3317.91	0	0	0	1797.39	0	0	0	0	0	0	0	0	0	0	0	0	0	0	0	0	0	0	0	0	0	0	0	0	0	0	0	0	0	0	0	0
18868_3228_x28576_y10788	4116.08	3291.3	2457.68	SSp-m	SSp-m	5	Pvalb-T2A-CreERT2;Ai166_396476-18868	18868	CTX_ET	TPC_sim	0	1654.65	0	0	0	0	8249.97	0	0	0	9.9989	0	0	0	0	0	0	0	0	0	0	0	0	0	0	0	0	0	0	0	0	0	0	0	0	0	0	0	0
18868_3389_x28317_y9872	4326.88	2949.4	2625.75	SSp-m	SSp-m	5	Pvalb-T2A-CreERT2;Ai166_396476-18868	18868	CTX_ET	TPC_sim	0	601.646	0	0	0	0	4909.99	0	0	0	0	0	0	0	0	0	0	0	0	0	0	0	0	0	0	0	0	0	0	0	0	0	0	0	0	0	0	0	0
18868_3419_x27168_y8481	4429.75	2345.77	3108.15	MOp	MOp	5	Pvalb-T2A-CreERT2;Ai166_396476-18868	18868	CTX_ET	TPC_sim	0	11331.8	892.358	0	0	0	426.958	922.224	0	0	0	0	0	0	0	0	0	0	0	0	0	0	0	0	0	0	0	0	0	0	0	0	0	0	0	0	0	0	0
18868_3453_x28753_y10380	4440.08	3147.52	2448.57	SSp-m	SSp-m	5	Pvalb-T2A-CreERT2;Ai166_396476-18868	18868	CTX_ET		0	3654.96	129.117	0	0	0	9808.56	0	0	0	172.916	0	0	0	0	0	0	0	0	0	0	0	0	0	0	0	0	0	0	0	0	0	0	0	0	0	0	0	0
18868_3488_x24952_y7321	4711.8	1842.82	3805.75	MOp	MOp	5	Pvalb-T2A-CreERT2;Ai166_396476-18868	18868	CTX_ET	TPC_sim	0	11913	6463.71	0	0	0	351.037	0	0	0	0	685.879	0	0	0	0	0	0	0	0	0	0	0	0	0	0	0	0	0	0	0	0	148.536	0	0	0	0	0	0
18868_3507_x7704_y10476	4178.9	3203.45	2519.58	SSp-m	SSp-m	5	Pvalb-T2A-CreERT2;Ai166_396476-18868	18868	CTX_ET	TPC_sim	0	428.777	0	0	0	0	8388.77	0	0	0	0	0	0	0	0	0	0	0	0	0	0	0	0	0	0	0	0	0	0	0	0	0	0	0	0	0	0	0	0
18868_3547_x28065_y9077	4594.73	2629.9	2784.05	SSp-m	SSp-m	5	Pvalb-T2A-CreERT2;Ai166_396476-18868	18868	CTX_ET	TPC_com	0	1417.88	0	0	0	0	11654.9	506.92	0	0	0	0	0	0	0	0	0	0	0	0	0	0	0	0	0	0	0	0	0	0	0	0	0	0	0	0	0	0	0
18868_3552_x28542_y9340	4577	2753.55	2593.27	SSp-m	SSp-m	5	Pvalb-T2A-CreERT2;Ai166_396476-18868	18868	CTX_ET	TPC_sim	0	0	0	0	0	0	2846.62	0	0	0	0	0	0	0	0	0	0	0	0	0	0	0	0	0	0	0	0	0	0	0	0	0	0	0	0	0	0	0	0
18868_3564_x27379_y8431	4683.08	2305.38	3080.73	SSp-ul	SSp-ul	5	Pvalb-T2A-CreERT2;Ai166_396476-18868	18868	CTX_ET		0	7116.49	1086.09	0	0	0	328.561	10014.6	0	0	0	0	0	0	0	0	0	0	0	0	0	0	0	0	0	0	0	0	0	0	0	0	0	0	0	0	0	0	0
18868_3592_x9776_y8113	4508.4	2218.77	3273.27	MOp	MOp	5	Pvalb-T2A-CreERT2;Ai166_396476-18868	18868	CTX_ET	TPC_com	0	13267.9	2119.87	0	0	0	528.275	4561.81	0	0	0	175.592	0	0	0	0	0	0	0	0	0	0	0	0	0	0	0	0	0	0	0	0	165.27	0	0	0	0	0	0
18868_3626_x29809_y12585	4667.7	3963.6	2077.57	SSs	SSs	5	Pvalb-T2A-CreERT2;Ai166_396476-18868	18868	CTX_ET	TPC_sim	0	866.733	0	0	0	0	2469.58	0	0	0	5641.51	20.0026	0	0	0	0	0	0	0	0	0	0	0	0	0	0	0	0	0	0	0	0	0	0	0	0	0	0	0
18868_3627_x28035_y8749	4726.2	2478.8	2837.48	SSp-m	SSp-m	5	Pvalb-T2A-CreERT2;Ai166_396476-18868	18868		TPC_sim	0	0	0	0	0	0	7218.56	854.16	0	0	0	0	0	0	0	0	0	0	0	0	0	0	0	0	0	0	0	0	0	0	0	0	0	0	0	0	0	0	0
18868_3658_x9598_y8113	4601	2218.88	3228.75	MOp	MOp	5	Pvalb-T2A-CreERT2;Ai166_396476-18868	18868	CTX_ET	TPC_com	0	11296.5	966.659	0	0	0	1658.2	3537.1	0	0	0	0	0	0	0	0	0	0	0	0	0	0	0	0	0	0	0	0	0	0	0	0	258.019	0	9.99369	0	0	0	0
18868_3699_x17279_y16010	4616.73	5073.8	5404.95	LSr	LSv	unknown	Pvalb-T2A-CreERT2;Ai166_396476-18868	18868			0	0	0	0	0	0	0	0	0	0	0	0	0	0	0	0	0	0	0	0	0	0	0	0	0	0	0	0	0	0	0	0	0	0	0	0	0	0	0
18868_3715_x8453_y8977	4590.2	2596.4	2827.72	SSp-m	SSp-m	5	Pvalb-T2A-CreERT2;Ai166_396476-18868	18868	CTX_ET	TPC_sim	0	5095.65	0	0	0	0	9672.21	212.177	0	0	0	0	0	0	0	0	0	0	0	0	0	0	0	0	0	0	0	0	0	0	0	0	0	0	0	0	0	0	0
18868_3781_x6715_y11703	4508.5	3648.25	2218.3	SSp-m	SSp-m	5	Pvalb-T2A-CreERT2;Ai166_396476-18868	18868	CTX_ET	TPC_sim	0	0	0	0	0	0	7412.34	0	0	0	109.971	0	0	0	0	0	0	0	0	0	0	0	0	0	0	0	0	0	0	0	0	0	0	0	0	0	0	0	0
18868_3783_x28846_y9268	4953.38	2731.48	2539.07	SSp-m	SSp-m	5	Pvalb-T2A-CreERT2;Ai166_396476-18868	18868	CTX_ET	TPC_sim	0	3908.25	7154.54	39.9922	0	0	12819	0	0	0	2289.3	0	0	0	0	0	0	0	0	0	0	0	0	0	0	0	0	0	0	0	0	0	0	0	0	0	0	0	0
18868_3799_x26336_y7466	5165.6	1839.65	3496.98	SSp-ul	SSp-ul	5	Pvalb-T2A-CreERT2;Ai166_396476-18868	18868	CTX_ET		0	2994.06	0	0	0	158.519	0	8586.12	0	0	0	0	0	0	0	0	0	0	0	0	0	0	0	0	0	0	0	0	0	0	0	0	0	0	0	0	0	0	0
18868_3799_x6462_y13405	4532.95	4244.23	2087.53	GU	GU	5	Pvalb-T2A-CreERT2;Ai166_396476-18868	18868		TPC_sim	0	39.2398	0	0	0	0	1147.77	0	0	0	3800.34	7829.51	486.939	0	0	0	0	0	0	0	0	0	0	0	0	0	0	0	0	0	0	0	0	0	0	0	0	0	0
18868_3853_x29683_y10294	5036.25	3138.7	2221.4	SSp-m	SSp-m	5	Pvalb-T2A-CreERT2;Ai166_396476-18868	18868	CTX_ET	TPC_sim	0	0	0	0	0	0	5545.21	0	0	0	0	0	0	0	0	0	0	0	0	0	0	0	0	0	0	0	0	0	0	0	0	0	0	0	0	0	0	0	0
18868_3856_x26025_y7205	5268.35	1725.35	3583.77	SSp-ul	SSp-ul	5	Pvalb-T2A-CreERT2;Ai166_396476-18868	18868	CTX_ET	TPC_sim	0	264.825	0	0	0	0	0	2978.43	0	0	0	0	0	0	0	0	0	0	0	0	0	0	0	0	0	0	0	0	0	0	0	0	0	0	0	0	0	0	0
18868_3871_x26350_y7564	5257	1865.12	3481.52	SSp-ul	SSp-ul	5	Pvalb-T2A-CreERT2;Ai166_396476-18868	18868	CTX_ET		0	2772.87	0	0	0	513.932	0	10074.9	0	0	0	0	0	0	0	0	0	0	0	0	0	0	0	0	0	0	0	0	0	0	0	0	0	0	0	0	0	0	0
18868_3875_x8707_y8341	4868	2296.93	2957.9	SSp-ul	SSp-m	5	Pvalb-T2A-CreERT2;Ai166_396476-18868	18868	CTX_ET	TPC_sim	0	47.2836	0	0	0	0	2744.93	7213.21	0	0	0	0	0	0	0	0	0	0	0	0	0	0	0	0	0	0	0	0	0	0	0	0	0	0	0	0	0	0	0
18868_3922_x26631_y7518	5345.9	1834	3404.77	SSp-ul	SSp-ul	5	Pvalb-T2A-CreERT2;Ai166_396476-18868	18868	CTX_ET		0	2134.65	0	0	0	268.733	0	7510.39	0	0	0	0	0	0	0	0	0	0	0	0	0	0	0	0	0	0	0	0	0	0	0	0	0	0	0	0	0	0	0
18868_3931_x26823_y7496	5343.25	1812.2	3356.77	SSp-ul	SSp-ul	5	Pvalb-T2A-CreERT2;Ai166_396476-18868	18868	CTX_ET		0	0	0	0	0	119.493	0	6872.06	0	0	0	0	0	0	0	0	0	0	0	0	0	0	0	0	0	0	0	0	0	0	0	0	0	0	0	0	0	0	0
18868_3932_x25373_y7132	5369.7	1728.55	3767.82	SSp-ll	SSp-ll	5	Pvalb-T2A-CreERT2;Ai166_396476-18868	18868	CTX_ET		0	4785.24	0	501.823	301.229	4798.41	0	5366.75	0	542.866	0	0	0	0	0	0	0	0	0	0	0	0	0	0	0	0	0	0	0	0	0	0	0	0	0	0	0	0	0
18868_3977_x25824_y7160	5431.58	1717.62	3649.02	SSp-ul	SSp-ul	5	Pvalb-T2A-CreERT2;Ai166_396476-18868	18868	CTX_ET	TPC_sim	0	89.1011	0	0	0	1353.35	0	3206.72	0	0	0	0	0	0	0	0	0	0	0	0	0	0	0	0	0	0	0	0	0	0	0	0	0	0	0	0	0	0	0
18868_3981_x30626_y12403	5139.88	3890.75	1900.5	SSs	SSs	5	Pvalb-T2A-CreERT2;Ai166_396476-18868	18868	CTX_ET		0	1741.37	0	0	0	0	1170.53	0	0	0	9042.78	218.72	0	0	0	0	0	0	0	0	0	0	0	0	0	0	0	0	0	0	0	0	0	0	0	0	0	0	0
18868_4041_x10632_y7193	5245.67	1709.88	3660.88	SSp-ul	SSp-ul	5	Pvalb-T2A-CreERT2;Ai166_396476-18868	18868	CTX_ET	TPC_sim	0	1566.79	0	0	0	825.154	0	4243.59	0	0	0	0	0	0	0	0	0	0	0	0	0	0	0	0	0	0	0	0	0	0	0	0	0	0	0	0	0	0	0
18868_4047_x27203_y7787	5479.2	1959.68	3249.18	SSp-ul	SSp-ul	5	Pvalb-T2A-CreERT2;Ai166_396476-18868	18868	CTX_ET	TPC_sim	0	9231.94	9.9939	1080.67	2165.29	109.888	0	12050.5	0	945.416	6373.02	0	0	0	0	0	0	0	0	0	0	0	0	0	0	0	0	0	0	0	0	0	0	0	0	0	0	0	0
18868_4132_x11881_y6094	5368.85	1509.05	4032.08	MOp	MOp	5	Pvalb-T2A-CreERT2;Ai166_396476-18868	18868	CTX_ET	TPC_sim	0	6180.8	0	0	0	668.655	0	0	0	0	0	0	0	0	0	0	0	0	0	0	0	0	0	0	0	0	0	0	0	0	0	0	0	0	0	0	0	0	0
18868_4192_x10967_y7007	5455.75	1611.65	3774.05	SSp-ll	SSp-ul	5	Pvalb-T2A-CreERT2;Ai166_396476-18868	18868	CTX_ET	TPC_sim	0	1992.28	0	0	0	4584.96	0	3041.76	0	0	0	0	0	0	0	0	0	0	0	0	0	0	0	0	0	0	0	0	0	0	0	0	0	0	0	0	0	0	0
18868_4221_x5685_y12199	5071.95	3816.35	1861.03	SSs	SSs	5	Pvalb-T2A-CreERT2;Ai166_396476-18868	18868	CTX_ET	TPC_sim	0	0	0	0	0	0	159.199	0	0	0	9444.9	0	0	0	0	0	0	0	0	0	0	0	0	0	0	0	0	0	0	0	0	0	0	473.335	0	0	0	0	0
18868_4317_x23980_y6346	5857.2	1526.3	4147.4	SSp-ll	SSp-ll	5	Pvalb-T2A-CreERT2;Ai166_396476-18868	18868	CTX_ET	TPC_sim	0	8030.61	109.71	0	0	15308.5	0	1114.34	0	0	0	0	0	0	0	0	0	0	0	0	0	0	0	0	0	0	0	0	0	0	0	0	0	0	0	0	0	0	0
18868_4341_x30419_y10114	5719.52	3044	2037.15	SSp-n	SSp-n	5	Pvalb-T2A-CreERT2;Ai166_396476-18868	18868	CTX_ET		0	3503.44	2185.95	4683.1	0	0	3393.96	169.372	0	0	1886.45	0	0	0	0	0	0	0	0	0	0	0	0	0	0	0	0	0	0	0	0	0	0	0	0	0	0	0	0
18868_4430_x9829_y7185	5741.92	1632.03	3448.58	SSp-ul	SSp-ul	5	Pvalb-T2A-CreERT2;Ai166_396476-18868	18868	CTX_ET	TPC_com	0	1432.12	527.7	0	0	819.331	0	8493.51	0	69.3019	0	0	0	0	0	0	0	0	0	0	0	0	0	0	0	0	0	0	0	0	0	0	0	0	0	0	0	0	0
18868_4434_x10947_y6887	5744.62	1540.05	3782.05	SSp-ll	SSp-ul	5	Pvalb-T2A-CreERT2;Ai166_396476-18868	18868	CTX_ET	TPC_sim	0	109.481	0	0	0	3594.84	0	1141.71	0	0	0	0	0	0	0	0	0	0	0	0	0	0	0	0	0	0	0	0	0	0	0	0	0	0	0	0	0	0	0
18868_4464_x5477_y11004	5436.17	3356.85	1782.55	SSs	SSs	5	Pvalb-T2A-CreERT2;Ai166_396476-18868	18868	CTX_ET	TPC_sim	0	0	0	1109.29	0	0	2299.29	0	0	0	8546.03	0	0	0	0	0	0	0	0	0	0	0	0	0	0	0	0	0	0	0	0	0	0	0	0	0	0	0	0
18868_4517_x31548_y11591	5875.95	3523.95	1650.18	SSs	SSs	5	Pvalb-T2A-CreERT2;Ai166_396476-18868	18868	CTX_ET	TPC_sim	0	0	0	0	0	0	0	0	0	0	10908.1	78.5721	0	0	0	0	0	0	0	0	0	0	0	0	0	0	0	0	0	0	0	0	29.9802	0	0	0	0	0	0
18868_4523_x15124_y15767	5670.55	4951.45	4714.92	BST	RT	unknown	Pvalb-T2A-CreERT2;Ai166_396476-18868	18868			0	0	0	0	0	0	0	0	0	0	0	0	0	0	0	0	0	0	0	0	0	0	0	0	0	0	0	0	0	0	0	0	0	0	0	0	0	0	0
18868_4549_x5910_y9879	5613.2	2944.57	1906.78	SSp-n	SSp-m	5	Pvalb-T2A-CreERT2;Ai166_396476-18868	18868	CTX_ET	TPC_sim	0	0	0	14319.8	0	0	387.953	0	0	0	1000.12	0	0	0	0	0	0	0	0	0	0	0	0	0	0	0	0	0	0	0	0	0	0	0	0	0	0	0	0
18868_4634_x13823_y16687	5768.45	5279	4319.9	unknown	RT	unknown	Pvalb-T2A-CreERT2;Ai166_396476-18868	18868			0	0	0	0	0	0	0	0	0	0	0	0	0	0	0	0	0	0	0	0	0	0	0	0	0	0	0	0	0	0	0	0	0	0	0	0	0	0	0
18868_4648_x14941_y16268	5802.02	5138.25	4649.52	BST	RT	unknown	Pvalb-T2A-CreERT2;Ai166_396476-18868	18868			0	0	0	0	0	0	0	0	0	0	0	0	0	0	0	0	0	0	0	0	0	0	0	0	0	0	0	0	0	0	0	0	0	0	0	0	0	0	0
18868_4693_x13797_y16937	5828.25	5371.02	4305.5	unknown	RT	unknown	Pvalb-T2A-CreERT2;Ai166_396476-18868	18868			0	0	0	0	0	0	0	0	0	0	0	0	0	0	0	0	0	0	0	0	0	0	0	0	0	0	0	0	0	0	0	0	0	0	0	0	0	0	0
18868_4706_x15828_y16760	5841.02	5335.62	4904.17	BST	RT	unknown	Pvalb-T2A-CreERT2;Ai166_396476-18868	18868			0	0	0	0	0	0	0	0	0	0	0	0	0	0	0	0	0	0	0	0	0	0	0	0	0	0	0	0	0	0	0	0	0	0	0	0	0	0	0
18868_4739_x28536_y7468	6353.95	1815.03	2874.55	SSp-bfd	SSp-bfd	5	Pvalb-T2A-CreERT2;Ai166_396476-18868	18868	CTX_ET	TPC_sim	0	0	0	0	11043.3	0	0	1297.25	0	1390.27	1004.52	0	0	0	0	0	0	0	0	0	0	0	0	0	0	0	0	0	0	0	0	0	0	0	0	0	0	0	0
18868_4757_x15158_y16995	5897.2	5414.15	4700.5	unknown	RT	unknown	Pvalb-T2A-CreERT2;Ai166_396476-18868	18868			0	0	0	0	0	0	0	0	0	0	0	0	0	0	0	0	0	0	0	0	0	0	0	0	0	0	0	0	0	0	0	0	0	0	0	0	0	0	0
18868_4803_x7002_y8311	6064.73	2268.93	2323.08	SSp-n	SSp-n	5	Pvalb-T2A-CreERT2;Ai166_396476-18868	18868	CTX_ET	TPC_sim	0	0	0	6956.29	368.947	0	0	0	0	0	0	0	0	0	0	0	0	0	0	0	0	0	0	0	0	0	0	0	0	0	0	0	0	0	0	0	0	0	0
18868_4818_x14513_y17030	5975.1	5417.98	4506.2	LHA	RT	unknown	Pvalb-T2A-CreERT2;Ai166_396476-18868	18868			0	0	0	0	0	0	0	0	0	0	0	0	0	0	0	0	0	0	0	0	0	0	0	0	0	0	0	0	0	0	0	0	0	0	0	0	0	0	0
18868_4863_x31402_y10126	6381.85	2996.93	1681.15	SSs	SSs	5	Pvalb-T2A-CreERT2;Ai166_396476-18868	18868	CTX_ET	TPC_sim	0	0	0	20.0036	931.934	0	0	0	0	0	8724.78	0	0	0	0	0	0	0	0	0	0	0	0	0	0	0	0	0	0	0	0	0	0	0	0	0	0	0	0
18868_4883_x27078_y6285	6530.38	1317.55	3355.88	SSp-ul	SSp-bfd	5	Pvalb-T2A-CreERT2;Ai166_396476-18868	18868	CTX_ET	TPC_sim	0	0	0	0	0	0	0	4856.08	329	2428.86	0	0	0	0	0	0	0	0	0	0	0	0	0	0	0	0	0	0	0	0	0	0	0	0	0	0	0	0	154.493
18868_4944_x7089_y8035	4859.8	2291.3	2956.5	SSp-ul	SSp-bfd	5	Pvalb-T2A-CreERT2;Ai166_396476-18868	18868	CTX_ET	TPC_sim	0	0	0	0	0	0	1779.48	5654.87	0	0	0	0	0	0	0	0	0	0	0	0	0	0	0	0	0	0	0	0	0	0	0	0	0	0	0	0	0	0	0
18868_5131_x7596_y7239	6546.92	1673.65	2670.92	SSp-bfd	SSp-bfd	5	Pvalb-T2A-CreERT2;Ai166_396476-18868	18868	CTX_ET	TPC_sim	0	0	0	0	13712.9	0	0	0	0	0	0	0	0	0	0	0	0	0	0	0	0	0	0	0	0	0	0	0	0	0	0	0	0	0	0	0	0	0	0
18868_5141_x8535_y6876	6578.38	1504.75	3045.33	SSp-bfd	SSp-bfd	5	Pvalb-T2A-CreERT2;Ai166_396476-18868	18868	CTX_ET	TPC_sim	0	0	0	0	10224.8	276.719	0	1723.73	0	1366	59.9315	0	0	0	0	0	0	0	0	0	0	0	0	0	0	0	0	0	0	0	0	0	0	0	0	0	0	0	0
18868_5156_x9540_y6495	6606.4	1369.57	3374.23	SSp-un	SSp-bfd	5	Pvalb-T2A-CreERT2;Ai166_396476-18868	18868	CTX_ET	TPC_sim	0	0	0	0	3214.71	665.448	0	3771.15	954.861	3436.84	0	0	0	0	0	0	0	0	0	0	0	0	0	0	0	0	0	0	0	0	0	0	0	0	0	0	0	0	299.335
18868_5242_x9858_y5968	6730.33	1181.97	3477.2	SSp-tr	SSp-bfd	5	Pvalb-T2A-CreERT2;Ai166_396476-18868	18868	CTX_ET	TPC_sim	0	0	0	0	678.017	9.99479	0	1520.48	3570.28	451.438	0	0	0	0	0	0	0	0	0	0	0	0	0	0	0	0	0	0	0	0	0	0	0	0	0	0	0	0	239.58
18868_5369_x19532_y5532	7062.35	1379.1	5378.15	RSPv	RSPv	5	Pvalb-T2A-CreERT2;Ai166_396476-18868	18868		TPC_sim	0	0	0	0	0	0	0	0	0	0	0	0	0	0	0	0	0	0	0	0	0	0	0	0	0	0	0	0	0	0	0	0	0	0	0	0	0	12713	0
18868_5397_x19819_y6085	7094.15	1553.75	5310.05	fiber tracts	RSPv	5	Pvalb-T2A-CreERT2;Ai166_396476-18868	18868		TPC_sim	0	0	421.286	0	0	0	0	0	0	0	0	0	0	0	0	0	0	0	29.984	0	2538.64	0	39.9311	0	0	1768.24	0	0	0	0	0	0	0	0	0	0	0	6670.25	1606.8
18868_5456_x7773_y6771	6901.6	1480.28	2757	SSp-bfd	SSp-bfd	5	Pvalb-T2A-CreERT2;Ai166_396476-18868	18868	CTX_ET	TPC_com	0	0	0	0	6713.34	0	0	0	99.3448	0	0	0	0	0	0	0	0	0	0	0	0	0	0	0	0	0	0	0	0	0	0	0	0	0	0	0	0	0	0
18868_5531_x7356_y7030	6967.12	1610.82	2561.85	SSp-bfd	SSp-bfd	5	Pvalb-T2A-CreERT2;Ai166_396476-18868	18868	CTX_ET	TPC_sim	0	0	0	0	7492.06	0	0	0	0	0	1245.57	0	0	0	0	0	0	0	0	0	0	0	0	0	0	0	0	0	0	0	0	0	0	0	0	0	0	0	0
18868_5686_x9887_y5415	7266.67	1014.62	3417.02	VISa	SSp-bfd	5	Pvalb-T2A-CreERT2;Ai166_396476-18868	18868	CTX_ET		0	0	0	0	2226.81	109.513	0	98.0706	2213.81	0	648.966	0	0	0	0	0	0	0	598.588	0	258.038	0	59.9253	0	0	0	0	0	0	0	0	0	0	0	0	0	0	0	6234.4
18868_5701_x9538_y5736	7252.27	1128.3	3311.25	VISa	SSp-bfd	5	Pvalb-T2A-CreERT2;Ai166_396476-18868	18868	CTX_ET	TPC_sim	0	0	0	0	2253.34	0	0	0	997.434	0	256.311	0	0	0	0	0	0	0	9.94064	0	366.455	0	29.751	0	0	0	0	0	0	0	0	0	0	0	0	0	0	0	6319.84
18868_5723_x7031_y7203	7136.85	1703.75	2428.92	SSp-bfd	SSs	5	Pvalb-T2A-CreERT2;Ai166_396476-18868	18868	CTX_ET	TPC_sim	0	0	0	0	10523.2	0	0	9.99941	1536.57	0	1168.05	0	0	0	0	0	0	0	0	0	0	0	0	0	0	0	0	0	0	0	0	0	0	0	0	0	0	0	189.583
18868_5724_x8616_y5999	7225.52	1233.8	3043.03	SSp-bfd	SSp-bfd	5	Pvalb-T2A-CreERT2;Ai166_396476-18868	18868	CTX_ET	TPC_sim	0	0	0	0	5330.46	0	0	0	184.812	0	0	0	0	0	0	0	0	0	0	0	0	0	0	0	0	0	0	0	0	0	0	0	0	0	0	0	0	0	1404.67
18868_5965_x17541_y6435	7827.98	1660.4	5447.42	RSPv	RSPv	5	Pvalb-T2A-CreERT2;Ai166_396476-18868	18868			0	0	0	0	0	659.3	0	39.9177	439.481	0	0	0	0	0	0	0	0	0	0	0	0	0	0	0	0	3976.91	2111.01	0	0	0	0	0	0	0	0	0	159.627	21817.3	0
18868_5983_x17523_y5085	7878.15	1167.1	5433.25	RSPv	RSPv	5	Pvalb-T2A-CreERT2;Ai166_396476-18868	18868		TPC_sim	0	0	0	0	0	39.9696	0	299.714	489.375	0	0	0	0	0	0	0	0	0	0	0	0	0	0	0	0	119.893	4216.9	0	0	0	0	0	0	0	0	339.735	0	22408.9	359.651
18868_6000_x19811_y5444	7923.67	1348.32	5325.92	RSPv	RSPv	5	Pvalb-T2A-CreERT2;Ai166_396476-18868	18868		TPC_sim	0	0	0	0	0	99.8597	0	149.804	169.845	0	0	0	0	0	0	0	0	0	0	0	0	0	0	0	0	0	9354.14	0	0	0	0	0	0	0	0	229.8	1595.74	23273.3	0
18868_6019_x9541_y5296	7626.92	1036.85	3248	VISa	VISrl	5	Pvalb-T2A-CreERT2;Ai166_396476-18868	18868		TPC_sim	0	0	0	0	699.496	0	0	0	0	0	0	0	0	0	0	0	0	1139.29	0	69.8328	964.839	0	0	0	0	0	0	0	0	0	0	0	0	0	0	0	0	0	5109.11
18868_6196_x17668_y4955	8214.1	1104.97	5448.27	RSPv	RSPv	5	Pvalb-T2A-CreERT2;Ai166_396476-18868	18868		TPC_sim	0	0	0	0	0	0	0	19.9917	439.763	0	0	0	0	0	0	0	0	0	796.824	0	0	0	0	0	0	0	0	0	0	0	0	0	0	0	0	1032.23	10552.2	18619.7	469.413
18868_6405_x11428_y4397	8210.72	785.25	3697.25	VISpm	VISpm	4	Pvalb-T2A-CreERT2;Ai166_396476-18868	18868			0	0	0	0	249.671	0	0	0	0	0	0	0	0	0	0	0	0	406.698	353.105	3177.96	6464.85	0	5171.09	0	0	0	0	0	0	0	0	0	0	0	0	0	0	0	59.9748
18868_6757_x10353_y4324	8535.08	794.625	3376.15	VISp	VISp	2/3	Pvalb-T2A-CreERT2;Ai166_396476-18868	18868			0	0	0	0	0	0	0	0	0	0	0	0	0	0	0	0	0	0	0	0	26736.8	0	0	0	0	0	0	0	0	0	0	0	0	0	0	0	0	0	0
18868_7311_x22238_y17329	9149.2	5789.98	4612.65	PRNr	TRN	unknown	Pvalb-T2A-CreERT2;Ai166_396476-18868	18868			0	0	0	0	0	0	0	0	0	0	0	0	0	0	0	0	0	0	0	0	0	0	0	0	0	0	0	0	0	0	0	0	0	0	0	0	0	0	0
18869_00004	6105.77	4105.15	4131.88	RT	RT	unknown	Pvalb-T2A-CreERT2;Ai166_396477-18869	18869			0	0	0	0	0	0	0	0	0	0	0	0	0	0	0	0	0	0	0	0	0	0	0	0	0	0	0	0	0	0	0	0	0	0	0	0	0	0	0
18869_00020	10578.7	5443.83	3452.7	fiber tracts	PSV	unknown	Pvalb-T2A-CreERT2;Ai166_396477-18869	18869			0	0	0	0	0	0	0	0	0	0	0	0	0	0	0	0	0	0	0	0	0	0	0	0	0	0	0	0	0	0	0	0	0	0	0	0	0	0	0
18869_00022	5840.2	5186.98	4517.52	unknown	RT	unknown	Pvalb-T2A-CreERT2;Ai166_396477-18869	18869			0	0	0	0	0	0	0	0	0	0	0	0	0	0	0	0	0	0	0	0	0	0	0	0	0	0	0	0	0	0	0	0	0	0	0	0	0	0	0
18869_00023	6364.27	5009.73	3889.62	fiber tracts	CP	unknown	Pvalb-T2A-CreERT2;Ai166_396477-18869	18869	CP_others		0	0	0	0	0	0	0	0	0	0	0	0	0	0	0	0	0	0	0	0	0	0	0	0	0	0	0	0	0	0	0	0	0	0	0	0	0	0	0
18869_00024	6281.92	5121.83	4090.4	fiber tracts	CP	unknown	Pvalb-T2A-CreERT2;Ai166_396477-18869	18869			0	0	0	0	0	0	0	0	0	0	0	0	0	0	0	0	0	0	0	0	0	0	0	0	0	0	0	0	0	0	0	0	0	0	0	0	0	0	0
18869_00026	6307.45	4316.48	3570.45	fiber tracts	RT	unknown	Pvalb-T2A-CreERT2;Ai166_396477-18869	18869			0	0	0	0	0	0	0	0	0	0	0	0	0	0	0	0	0	0	0	0	0	0	0	0	0	0	0	0	0	0	0	0	0	0	0	0	0	0	0
18869_00028	6711.92	4507.27	3347.73	fiber tracts	RT	unknown	Pvalb-T2A-CreERT2;Ai166_396477-18869	18869			0	0	0	0	0	0	0	0	0	0	0	0	0	0	0	0	0	0	0	0	0	0	0	0	0	0	0	0	0	0	0	0	0	0	0	0	0	0	0
18869_3064_x20999_y7621	4063.2	3638.1	2636.35	SSp-m	SSp-m	5	Pvalb-T2A-CreERT2;Ai166_396477-18869	18869	CTX_ET	TPC_sim	0	665.616	0	0	0	0	3254.9	0	0	0	0	0	0	0	0	0	0	0	0	0	0	0	0	0	0	0	0	0	0	0	0	0	0	0	0	0	0	0	0
18869_3239_x6605_y6691	4097.9	3586.55	2454.65	SSp-m	SSp-m	5	Pvalb-T2A-CreERT2;Ai166_396477-18869	18869	CTX_ET	TPC_sim	0	636.844	0	0	0	0	4018.11	0	0	0	187.377	0	0	0	0	0	0	0	0	0	0	0	0	0	0	0	0	0	0	0	0	0	165.925	169.218	0	0	0	0	0
18869_3263_x6927_y6229	4166.45	3311.27	2605.33	SSp-m	SSp-m	5	Pvalb-T2A-CreERT2;Ai166_396477-18869	18869	CTX_ET	TPC_sim	0	2941.51	0	0	0	0	3811.71	0	0	0	0	59.9987	0	0	0	0	0	0	0	0	0	0	0	0	0	0	0	0	0	0	0	0	0	1284.53	0	0	0	0	0
18869_3305_x6812_y6104	4205.95	3250.4	2534.2	SSp-m	SSp-m	5	Pvalb-T2A-CreERT2;Ai166_396477-18869	18869	CTX_ET	TPC_sim	0	73.6839	0	0	0	0	3133.59	0	0	0	0	0	0	0	0	0	0	0	0	0	0	0	0	0	0	0	0	0	0	0	0	0	0	385.555	0	0	0	0	0
18869_3321_x21485_y7678	4464.27	3624.88	2411.57	SSp-m	SSp-m	5	Pvalb-T2A-CreERT2;Ai166_396477-18869	18869	CTX_ET	TPC_sim	0	0	0	0	0	0	4244.44	0	0	0	0	0	0	0	0	0	0	0	0	0	0	0	0	0	0	0	0	0	0	0	0	0	0	0	0	0	0	0	0
18869_3395_x6415_y6741	4402.88	3740.1	2320.38	SSp-m	SSp-m	5	Pvalb-T2A-CreERT2;Ai166_396477-18869	18869	CTX_ET		0	0	0	0	0	0	6430.66	0	0	0	0	0	0	0	0	0	0	0	0	0	0	0	0	0	0	0	0	0	0	0	0	0	0	0	0	0	0	0	0
18869_3398_x6248_y7047	4297.62	3779.75	2302.9	SSp-m	SSp-m	5	Pvalb-T2A-CreERT2;Ai166_396477-18869	18869	CTX_ET	TPC_com	0	2454.84	0	0	0	0	8724.76	0	0	0	689.06	1413.23	115.24	0	0	0	0	0	0	0	0	0	0	0	0	0	0	0	0	0	0	0	456.388	199.663	0	0	0	0	0
18869_3480_x6168_y6983	4408.62	3738.68	2267.47	SSp-m	SSp-m	5	Pvalb-T2A-CreERT2;Ai166_396477-18869	18869	CTX_ET	TPC_sim	0	3093.82	529.707	0	0	0	8880.46	0	0	0	474.282	318.079	0	0	0	0	0	0	0	0	0	0	0	0	0	0	0	0	0	0	0	0	0	149.916	0	0	0	0	0
18869_3482_x7077_y5660	4505.05	2969.48	2664.62	SSp-m	SSp-m	5	Pvalb-T2A-CreERT2;Ai166_396477-18869	18869	CTX_ET	TPC_sim	0	0	0	0	0	0	4056.97	0	0	0	0	0	0	0	0	0	0	0	0	0	0	0	0	0	0	0	0	0	0	0	0	0	0	0	0	0	0	0	0
18869_3504_x6554_y5961	4452.7	3154.55	2414.62	SSp-m	SSp-m	5	Pvalb-T2A-CreERT2;Ai166_396477-18869	18869	CTX_ET	TPC_sim	0	0	0	0	0	0	4414.82	0	0	0	0	0	0	0	0	0	0	0	0	0	0	0	0	0	0	0	0	0	0	0	0	0	0	0	0	0	0	0	0
18869_3506_x6250_y6810	4449.15	3642.45	2303.2	SSp-m	SSp-m	5	Pvalb-T2A-CreERT2;Ai166_396477-18869	18869	CTX_ET	TPC_com	0	3369.59	98.7236	0	0	0	7618.55	0	0	0	1055.6	516.373	0	0	0	0	0	0	0	0	0	0	0	0	0	0	0	0	0	0	0	0	0	1185.57	0	0	0	0	0
18869_3547_x21769_y7449	4777.25	3459.65	2301.32	SSp-m	SSp-m	5	Pvalb-T2A-CreERT2;Ai166_396477-18869	18869	CTX_ET	TPC_sim	0	939.881	79.4456	0	0	0	6457.25	0	0	0	0	0	0	0	0	0	0	0	0	0	0	0	0	0	0	0	0	0	0	0	0	0	489.769	0	0	0	0	0	0
18869_3590_x6132_y6798	4546.73	3633	2248.83	SSp-m	SSp-m	5	Pvalb-T2A-CreERT2;Ai166_396477-18869	18869	CTX_ET	TPC_sim	0	0	0	0	0	0	7376.45	0	0	0	1971.48	0	0	0	0	0	0	0	0	0	0	0	0	0	0	0	0	0	0	0	0	0	0	99.696	0	0	0	0	0
18869_3634_x20027_y5437	4986.58	2263.68	3338.43	SSp-ul	SSp-m	5	Pvalb-T2A-CreERT2;Ai166_396477-18869	18869	CTX_ET	TPC_sim	0	0	0	0	0	0	0	5497.37	0	0	0	0	0	0	0	0	0	0	0	0	0	0	0	0	0	0	0	0	0	0	0	0	0	0	0	0	0	0	0
18869_3634_x5750_y7170	4559.83	3847.62	2072.88	SSs	SSp-m	5	Pvalb-T2A-CreERT2;Ai166_396477-18869	18869	CTX_ET	TPC_sim	0	0	0	0	0	0	2799.1	0	0	0	4975.47	0	0	0	0	0	0	0	0	0	0	0	0	0	0	0	0	0	0	0	0	0	0	0	0	0	0	0	0
18869_3659_x21701_y7032	4931.98	3201.2	2375.85	SSp-m	SSp-m	5	Pvalb-T2A-CreERT2;Ai166_396477-18869	18869	CTX_ET	TPC_sim	0	0	0	0	0	0	6342.79	0	0	0	0	0	0	0	0	0	0	0	0	0	0	0	0	0	0	0	0	0	0	0	0	0	0	0	0	0	0	0	0
18869_3701_x5589_y7633	4647.85	4105.52	2004.42	SSs	SSp-m	5	Pvalb-T2A-CreERT2;Ai166_396477-18869	18869	CTX_ET	TPC_sim	0	0	0	0	0	0	410.701	0	0	0	6458.49	3061.4	0	0	0	0	0	0	0	0	0	0	0	0	0	0	0	0	0	0	0	0	0	39.9967	0	0	0	0	0
18869_3701_x7703_y4993	4905.35	2533.7	2988.08	SSp-m	SSp-m	6a	Pvalb-T2A-CreERT2;Ai166_396477-18869	18869			0	1545.03	0	0	0	0	11697.8	10931.5	0	82.4782	0	0	0	0	0	0	0	0	0	0	0	0	0	0	0	0	0	0	0	0	0	0	0	0	0	0	0	0	0
18869_3741_x6284_y6163	4770.62	3261.88	2307.08	SSp-m	SSp-m	5	Pvalb-T2A-CreERT2;Ai166_396477-18869	18869	CTX_ET	TPC_sim	0	0	0	0	0	0	8087.1	0	0	0	0	256.44	0	0	0	0	0	0	0	0	0	0	0	0	0	0	0	0	0	0	0	0	0	0	0	0	0	0	0
18869_3751_x5868_y6832	4731.48	3648.07	2125.92	SSp-m	SSp-m	5	Pvalb-T2A-CreERT2;Ai166_396477-18869	18869	CTX_ET	TPC_com	0	544.533	0	0	0	0	12595.3	189.089	0	0	4876.04	1307.3	0	0	0	0	0	0	0	0	0	0	0	0	0	0	0	0	0	0	0	0	399.984	487.857	49.7898	0	0	0	0
18869_3761_x5335_y8118	4712.98	4387.15	1876.25	GU	SSs	5	Pvalb-T2A-CreERT2;Ai166_396477-18869	18869	CTX_ET	TPC_com	0	0	0	0	0	0	0	0	0	0	2424.41	5114.53	0	0	0	0	0	0	0	0	0	0	0	0	0	0	0	0	0	0	0	0	0	0	0	0	0	0	0
18869_3857_x22137_y7268	5198.52	3294.68	2169.98	SSp-m	SSp-m	5	Pvalb-T2A-CreERT2;Ai166_396477-18869	18869	CTX_ET	TPC_sim	0	2760.99	29.9038	0	0	0	12084.8	0	0	0	279.57	0	0	0	0	0	0	0	0	0	0	0	0	0	0	0	0	0	0	0	0	0	0	0	0	0	0	0	0
18869_3937_x5000_y8198	4905.35	4436	1724.7	GU	SSp-m	5	Pvalb-T2A-CreERT2;Ai166_396477-18869	18869	CTX_ET	TPC_sim	0	0	0	0	0	0	0	0	0	0	2582.73	2965.68	346.543	0	0	0	0	0	0	0	0	0	0	0	0	0	0	0	0	0	0	0	0	258.084	0	0	0	0	0
18869_4001_x4383_y7249	4880.8	3936.98	1380.9	SSs	SSs	2/3	Pvalb-T2A-CreERT2;Ai166_396477-18869	18869			0	0	0	0	0	0	49.5134	0	0	0	37188.3	10.0034	114.062	0	0	0	0	0	0	0	0	0	0	0	0	0	0	0	0	0	0	0	0	0	0	0	0	0	0
18869_4026_x21667_y6102	5435.75	2597.3	2516.35	SSp-n	SSp-m	5	Pvalb-T2A-CreERT2;Ai166_396477-18869	18869	CTX_ET	TPC_sim	0	0	0	6185.56	0	0	99.6962	0	0	0	0	0	0	0	0	0	0	0	0	0	0	0	0	0	0	0	0	0	0	0	0	0	0	0	0	0	0	0	0
18869_4036_x8032_y4635	5367.7	2281.43	3179.03	SSp-ul	SSp-ul	5	Pvalb-T2A-CreERT2;Ai166_396477-18869	18869	CTX_ET	TPC_sim	0	5431.32	5106.37	0	0	1247.81	1290.36	10005.5	0	181.814	0	0	0	0	0	0	0	0	0	0	0	0	0	0	0	0	0	0	0	0	0	0	0	0	0	0	0	0	0
18869_4050_x21764_y6239	5470.58	2678.82	2458.88	SSp-n	SSp-m	5	Pvalb-T2A-CreERT2;Ai166_396477-18869	18869	CTX_ET	TPC_sim	0	0	0	3190.11	0	0	879.914	0	0	0	0	0	0	0	0	0	0	0	0	0	0	0	0	0	0	0	0	0	0	0	0	0	0	0	0	0	0	0	0
18869_4054_x19963_y5080	5468.12	2046.53	3490.25	SSp-ul	SSp-un	5	Pvalb-T2A-CreERT2;Ai166_396477-18869	18869	CTX_ET	TPC_sim	0	1060.77	615.788	0	0	0	0	7552.43	0	0	0	0	0	0	0	0	0	0	0	0	0	0	0	0	0	0	0	0	0	0	0	0	0	0	0	0	0	0	0
18869_4089_x6848_y5110	5337.38	2626.8	2576.38	SSp-m	SSp-m	6a	Pvalb-T2A-CreERT2;Ai166_396477-18869	18869			0	0	0	14406.8	0	0	13064.8	0	0	168.63	0	0	0	0	0	0	0	0	0	0	0	0	0	0	0	0	0	0	0	0	0	0	0	0	0	0	0	0	0
18869_4091_x4807_y8065	5123.77	4287.15	1686.2	SSs	SSs	5	Pvalb-T2A-CreERT2;Ai166_396477-18869	18869	CTX_ET		0	0	0	0	0	0	0	0	0	0	4530.4	230.223	385.114	0	0	0	0	0	0	0	0	0	0	0	0	0	0	0	0	0	0	0	0	0	0	0	0	0	0
18869_4181_x21056_y5611	5649.2	2315.57	2923.82	SSp-un	SSp-m	5	Pvalb-T2A-CreERT2;Ai166_396477-18869	18869	CTX_ET	TPC_sim	0	0	0	4351.21	0	0	288.587	1159.24	0	4241.88	2569.69	0	0	0	0	0	0	0	0	0	0	0	0	0	0	0	0	0	0	0	0	0	0	0	0	0	0	0	0
18869_4184_x11041_y4195	5456.5	1881.35	4505.95	MOp	MOp	6a	Pvalb-T2A-CreERT2;Ai166_396477-18869	18869			0	23768.7	2327.57	0	0	875.18	0	0	0	0	0	0	0	0	0	0	0	0	0	0	0	0	0	0	0	0	0	0	0	0	0	0	0	0	0	0	0	0	0
18869_4196_x21043_y5510	5641.6	2264.9	2925.9	SSp-un	SSp-m	5	Pvalb-T2A-CreERT2;Ai166_396477-18869	18869	CTX_ET	TPC_sim	0	1071.42	686.335	976.844	0	0	0	899.113	0	2857.86	0	0	0	0	0	0	0	0	0	0	0	0	0	0	0	0	0	0	0	0	0	0	0	0	0	0	0	0	0
18869_4253_x4991_y7023	5276.83	3763.12	1711.65	SSs	SSs	5	Pvalb-T2A-CreERT2;Ai166_396477-18869	18869	CTX_ET	TPC_sim	0	0	0	0	0	0	0	0	0	0	12051	0	69.9141	0	0	0	0	0	0	0	0	0	0	0	0	0	0	0	0	0	0	0	0	69.0897	0	0	0	0	0
18869_4268_x10899_y9077	5666	4460.25	4841.42	BST	RT	unknown	Pvalb-T2A-CreERT2;Ai166_396477-18869	18869			0	0	0	0	0	0	0	0	0	0	0	0	0	0	0	0	0	0	0	0	0	0	0	0	0	0	0	0	0	0	0	0	0	0	0	0	0	0	0
18869_4275_x8819_y9368	5495.23	4698.62	4075.3	CP	CP	unknown	Pvalb-T2A-CreERT2;Ai166_396477-18869	18869			0	0	0	0	0	0	0	0	0	0	0	0	0	0	0	0	0	0	0	0	0	0	0	0	0	0	0	0	0	698.919	0	0	2204.36	0	284.049	0	0	0	0
18869_4282_x22276_y6457	5732.65	2749.55	2240	SSp-n	SSp-n	5	Pvalb-T2A-CreERT2;Ai166_396477-18869	18869	CTX_ET	TPC_sim	0	0	0	7520.56	0	0	10.005	0	0	0	0	0	0	0	0	0	0	0	0	0	0	0	0	0	0	0	0	0	0	0	0	0	0	0	0	0	0	0	0
18869_4301_x16815_y4413	5655.7	1527.55	4411.95	MOp	MOp	5	Pvalb-T2A-CreERT2;Ai166_396477-18869	18869			0	51277.5	467.121	0	0	2891.85	0	0	0	0	0	0	0	0	0	0	0	0	0	0	0	0	0	0	0	0	0	0	0	0	0	0	0	0	0	0	0	0	0
18869_4301_x20547_y5218	5771.77	2124.3	3243.15	SSp-ul	SSp-un	5	Pvalb-T2A-CreERT2;Ai166_396477-18869	18869	CTX_ET	TPC_sim	0	419.326	0	0	0	0	0	6972.26	0	473.175	0	0	0	0	0	0	0	0	0	0	0	0	0	0	0	0	0	0	0	0	0	0	0	0	0	0	0	0	0
18869_4302_x23433_y9053	5707.33	4268.55	1539.12	SSs	SSs	5	Pvalb-T2A-CreERT2;Ai166_396477-18869	18869	CTX_ET	TPC_sim	0	0	0	0	0	0	0	0	0	0	8497.15	0	29.8369	0	0	0	0	0	0	0	0	0	0	0	0	0	0	0	0	0	0	0	0	49.997	0	0	0	0	0
18869_4345_x7097_y4738	5671.62	2394.4	2699.5	SSp-n	SSp-n	5	Pvalb-T2A-CreERT2;Ai166_396477-18869	18869	CTX_ET	TPC_sim	0	0	0	6829.39	78.6208	0	0	195.378	0	2143.88	0	0	0	0	0	0	0	0	0	0	0	0	0	0	0	0	0	0	0	0	0	0	0	0	0	0	0	0	0
18869_4347_x8166_y4281	5694.33	2077.1	3245.48	SSp-ul	SSp-ul	5	Pvalb-T2A-CreERT2;Ai166_396477-18869	18869	CTX_ET	TPC_sim	0	854.193	0	0	0	0	0	8910.86	0	1463.53	0	0	0	0	0	0	0	0	0	0	0	0	0	0	0	0	0	0	0	0	0	0	578.867	0	0	0	0	0	0
18869_4371_x21382_y5522	5852.23	2253.43	2791.65	SSp-n	SSp-n	5	Pvalb-T2A-CreERT2;Ai166_396477-18869	18869	CTX_ET	TPC_sim	0	0	0	3165.18	259.285	0	0	0	0	662.607	0	0	0	0	0	0	0	0	0	0	0	0	0	0	0	0	0	0	0	0	0	0	0	0	0	0	0	0	0
18869_4384_x15799_y10704	5811.38	5200.38	4888.5	unknown	RT	unknown	Pvalb-T2A-CreERT2;Ai166_396477-18869	18869			0	0	0	0	0	0	0	0	0	0	0	0	0	0	0	0	0	0	0	0	0	0	0	0	0	0	0	0	0	0	0	0	0	0	0	0	0	0	0
18869_4410_x8772_y3996	5714.92	1888.75	3547.58	SSp-ul	SSp-ul	5	Pvalb-T2A-CreERT2;Ai166_396477-18869	18869	CTX_ET	TPC_com	0	1396.22	868.775	0	0	285.934	0	4988.03	0	0	0	0	0	0	0	0	0	0	0	0	0	0	0	0	0	0	0	0	0	0	0	0	0	0	0	0	0	0	0
18869_4414_x15653_y4273	5594.83	1383.65	4934.02	MOs	MOs	6a	Pvalb-T2A-CreERT2;Ai166_396477-18869	18869			0	0	28174	0	0	0	0	0	0	0	0	0	0	0	0	0	0	0	0	0	0	0	0	0	0	0	0	0	0	0	0	0	0	0	0	0	0	0	0
18869_4419_x16667_y10498	5813	5030.67	4613.6	BST	RT	unknown	Pvalb-T2A-CreERT2;Ai166_396477-18869	18869			0	0	0	0	0	0	0	0	0	0	0	0	0	0	0	0	0	0	0	0	0	0	0	0	0	0	0	0	0	0	0	0	0	0	0	0	0	0	0
18869_4426_x7611_y4421	5776.77	2185.3	2962.42	SSp-un	SSp-un	5	Pvalb-T2A-CreERT2;Ai166_396477-18869	18869	CTX_ET	TPC_sim	0	1645.39	738.547	1638.31	0	0	0	1122.75	0	5414	49.5773	389.328	0	0	0	0	0	0	0	0	0	0	0	0	0	0	0	0	0	0	0	0	0	0	0	0	0	0	0
18869_4453_x9586_y8809	5745.6	4337.67	4395.42	unknown	RT	unknown	Pvalb-T2A-CreERT2;Ai166_396477-18869	18869			0	0	0	0	0	0	0	0	0	0	0	0	0	0	0	0	0	0	0	0	0	0	0	0	0	0	0	0	0	0	0	0	0	0	0	0	0	0	0
18869_4457_x17404_y9449	5841.3	4379.85	4411.23	RT	RT	unknown	Pvalb-T2A-CreERT2;Ai166_396477-18869	18869			0	0	0	0	0	0	0	0	0	0	0	0	0	0	0	0	0	0	0	0	0	0	0	0	0	0	0	0	0	0	0	0	0	0	0	0	0	0	0
18869_4468_x23035_y7089	5976.27	3129.5	1884.3	SSs	SSp-n	5	Pvalb-T2A-CreERT2;Ai166_396477-18869	18869	CTX_ET	TPC_sim	0	0	0	5277.72	0	0	0	0	0	0	7017.84	0	0	0	0	0	0	0	0	0	0	0	0	0	0	0	0	0	0	0	0	0	0	0	0	0	0	0	0
18869_4469_x21852_y5924	5973.08	2455.25	2533	SSp-n	SSp-n	5	Pvalb-T2A-CreERT2;Ai166_396477-18869	18869	CTX_ET	TPC_sim	0	0	0	7442.46	682.243	0	0	0	0	59.9272	389.586	0	0	0	0	0	0	0	0	0	0	0	0	0	0	0	0	0	0	0	0	0	0	0	0	0	0	0	0
18869_4511_x11720_y4070	5784.17	1829.68	4751.55	MOs	MOp	6a	Pvalb-T2A-CreERT2;Ai166_396477-18869	18869			0	12173.9	18654.1	0	0	0	0	0	0	0	0	0	0	0	0	0	0	0	0	0	0	0	0	0	0	197.855	0	0	0	0	0	0	0	0	0	0	0	0	0
18869_4520_x23555_y8194	5897.08	3495.65	1443.6	SSs	SSs	5	Pvalb-T2A-CreERT2;Ai166_396477-18869	18869			0	0	0	0	0	0	0	0	0	0	31836.3	0	1246.94	0	0	0	0	0	0	0	0	0	0	0	0	0	0	0	0	0	0	0	0	0	0	0	0	0	0
18869_4550_x17965_y4177	5892	1658.82	4500.83	MOp	MOp	6a	Pvalb-T2A-CreERT2;Ai166_396477-18869	18869			0	23976	198.25	0	0	261.454	0	0	0	0	0	0	0	0	0	0	0	0	0	0	0	0	0	0	0	0	0	0	0	0	0	0	0	0	0	0	0	0	0
18869_4550_x7203_y4574	5760.88	2287.48	2623.7	SSp-n	SSp-n	5	Pvalb-T2A-CreERT2;Ai166_396477-18869	18869	CTX_ET		0	940.513	0	6084.15	674.798	0	0	898.35	0	1209.78	0	0	0	0	0	0	0	0	0	0	0	0	0	0	0	0	0	0	0	0	0	0	0	0	0	0	0	0	0
18869_4571_x10055_y8359	5861.02	4087.52	4444.42	RT	RT	unknown	Pvalb-T2A-CreERT2;Ai166_396477-18869	18869			0	0	0	0	0	0	0	0	0	0	0	0	0	0	0	0	0	0	0	0	0	0	0	0	0	0	0	0	0	0	0	0	0	0	0	0	0	0	0
18869_4587_x23021_y6827	6072.3	2850.75	1723.22	SSs	SSs	5	Pvalb-T2A-CreERT2;Ai166_396477-18869	18869	CTX_ET		0	0	0	2443.72	662.336	0	0	0	0	0	4488.77	0	0	0	0	0	0	0	0	0	0	0	0	0	0	0	0	0	0	0	0	0	0	0	0	0	0	0	0
18869_4599_x7153_y3640	5883.42	1758.62	2693.6	SSp-bfd	SSp-bfd	4	Pvalb-T2A-CreERT2;Ai166_396477-18869	18869			0	0	0	298.058	7892.37	0	0	0	0	11545	0	0	0	0	0	0	0	0	0	0	0	0	0	0	0	0	0	0	0	0	0	0	0	0	0	0	0	0	0
18869_4625_x5853_y5391	5850.85	2946.1	1992.53	SSp-n	SSp-n	6a	Pvalb-T2A-CreERT2;Ai166_396477-18869	18869			0	0	0	5111.58	0	0	0	0	0	0	49.4829	0	0	0	0	0	0	0	0	0	0	0	0	0	0	0	0	0	0	0	0	0	0	0	0	0	0	0	0
18869_4629_x8451_y4031	5966.3	1960.53	3388.58	SSp-ul	SSp-ul	6a	Pvalb-T2A-CreERT2;Ai166_396477-18869	18869			0	3995.83	0	0	0	1175.82	0	22867	0	203.781	0	0	0	0	0	0	0	0	0	0	0	0	0	0	0	0	0	0	0	0	0	0	0	0	0	0	0	0	0
18869_4662_x10221_y8547	5942.33	4167.58	4492.7	unknown	RT	unknown	Pvalb-T2A-CreERT2;Ai166_396477-18869	18869			0	0	0	0	0	0	0	0	0	0	0	0	0	0	0	0	0	0	0	0	0	0	0	0	0	0	0	0	0	0	0	0	0	0	0	0	0	0	0
18869_4693_x19236_y9148	6004.45	4116.2	3820.45	fiber tracts	RT	unknown	Pvalb-T2A-CreERT2;Ai166_396477-18869	18869			0	0	0	0	0	0	0	0	0	0	0	0	0	0	0	0	0	0	0	0	0	0	0	0	0	0	0	0	0	0	0	0	0	0	0	0	0	0	0
18869_4722_x18329_y4110	6077.6	1620.47	4377.88	SSp-ll	SSp-ll	6a	Pvalb-T2A-CreERT2;Ai166_396477-18869	18869			0	11546.7	49.4939	0	0	19048.7	0	0	29.9989	0	0	0	0	0	0	0	0	0	0	0	0	0	0	0	0	0	0	0	0	0	0	0	0	0	0	135.818	0	0	0
18869_4727_x9851_y8415	5994.02	4109.1	4345.05	RT	RT	unknown	Pvalb-T2A-CreERT2;Ai166_396477-18869	18869			0	0	0	0	0	0	0	0	0	0	0	0	0	0	0	0	0	0	0	0	0	0	0	0	0	0	0	0	0	0	0	0	0	0	0	0	0	0	0
18869_4764_x5211_y5995	5938.33	3220.75	1767.08	SSs	SSs	5	Pvalb-T2A-CreERT2;Ai166_396477-18869	18869	CTX_ET		0	0	0	1059.44	0	0	0	0	0	0	8219.78	39.6721	0	0	0	0	0	0	0	0	0	0	0	0	0	0	0	0	0	0	0	0	0	0	0	0	0	0	0
18869_4786_x18238_y10268	6161.15	4759.02	4054.6	unknown	RT	unknown	Pvalb-T2A-CreERT2;Ai166_396477-18869	18869			0	0	0	0	0	0	0	0	0	0	0	0	0	0	0	0	0	0	0	0	0	0	0	0	0	0	0	0	0	0	0	0	0	0	0	0	0	0	0
18869_4787_x8961_y9647	6052.88	4781.35	4066.9	fiber tracts	RT	unknown	Pvalb-T2A-CreERT2;Ai166_396477-18869	18869			0	0	0	0	0	0	0	0	0	0	0	0	0	0	0	0	0	0	0	0	0	0	0	0	0	0	0	0	0	0	0	0	0	0	0	0	0	0	0
18869_4837_x18229_y3163	6233.1	905.675	4416.2	SSp-tr	SSp-tr	4	Pvalb-T2A-CreERT2;Ai166_396477-18869	18869			0	1945.17	0	0	0	15287.2	0	0	23559	0	0	0	0	0	0	0	0	0	0	0	0	0	0	0	0	0	0	0	0	0	0	0	0	0	0	734.673	0	0	0
18869_4841_x18666_y8144	6424.05	3501.95	3840.23	RT	RT	unknown	Pvalb-T2A-CreERT2;Ai166_396477-18869	18869			0	0	0	0	0	0	0	0	0	0	0	0	0	0	0	0	0	0	0	0	0	0	0	0	0	0	0	0	0	0	0	0	0	0	0	0	0	0	0
18869_4848_x18620_y8132	6417.35	3480.65	3866.02	RT	RT	unknown	Pvalb-T2A-CreERT2;Ai166_396477-18869	18869			0	0	0	0	0	0	0	0	0	0	0	0	0	0	0	0	0	0	0	0	0	0	0	0	0	0	0	0	0	0	0	0	0	0	0	0	0	0	0
18869_4883_x18883_y4120	6259.83	1630.15	4177.7	SSp-ll	SSp-ll	6a	Pvalb-T2A-CreERT2;Ai166_396477-18869	18869			0	0	0	0	0	21543.7	0	0	99.9603	0	0	0	0	0	0	0	0	0	0	0	0	0	0	0	0	0	0	0	0	0	0	0	0	0	0	0	0	0	0
18869_4890_x8926_y9583	6159.23	4732.7	4035.05	unknown	RT	unknown	Pvalb-T2A-CreERT2;Ai166_396477-18869	18869			0	0	0	0	0	0	0	0	0	0	0	0	0	0	0	0	0	0	0	0	0	0	0	0	0	0	0	0	0	0	0	0	0	0	0	0	0	0	0
18869_4912_x19648_y8510	6258.88	3755.2	3667.1	RT	RT	unknown	Pvalb-T2A-CreERT2;Ai166_396477-18869	18869			0	0	0	0	0	0	0	0	0	0	0	0	0	0	0	0	0	0	0	0	0	0	0	0	0	0	0	0	0	0	0	0	0	0	0	0	0	0	0
18869_4953_x22613_y6076	6513.62	2499.35	2205.73	SSp-bfd	SSp-n	5	Pvalb-T2A-CreERT2;Ai166_396477-18869	18869	CTX_ET	TPC_sim	0	0	0	9.99314	10283.1	0	0	0	0	0	2834.94	0	0	0	0	0	0	0	0	0	0	0	0	0	0	0	0	0	0	0	0	0	0	0	0	0	0	0	0
18869_4997_x13063_y4444	6322.98	2163.25	5249.88	fiber tracts	RSPv	unknown	Pvalb-T2A-CreERT2;Ai166_396477-18869	18869			0	0	3334.21	0	0	0	0	0	0	0	0	0	0	0	0	0	0	0	0	0	0	0	0	0	0	5558.53	1757.46	119.472	0	79.6867	0	0	0	0	0	10.0034	639.415	1477.37	0
18869_5019_x5442_y5910	6320.27	3075.73	1903.58	SSs	SSs	6a	Pvalb-T2A-CreERT2;Ai166_396477-18869	18869			0	0	0	1980.99	1083.25	0	0	0	0	0	37592.4	0	0	0	0	0	0	0	0	0	0	0	0	0	0	0	0	0	0	0	0	0	0	0	0	0	0	0	0
18869_5024_x5544_y5480	6304.48	2955.88	1873.25	SSs	SSs	6a	Pvalb-T2A-CreERT2;Ai166_396477-18869	18869			0	1008.7	3772.96	1692.8	5067.68	0	0	739.018	0	219.806	6001.97	0	0	0	0	0	0	0	0	0	0	0	0	0	0	0	0	0	0	0	0	0	0	0	0	0	0	0	0
18869_5033_x23046_y6158	6602.2	2527.8	1978.68	SSp-bfd	SSp-n	5	Pvalb-T2A-CreERT2;Ai166_396477-18869	18869	CTX_ET	TPC_sim	0	0	0	178.561	5419.52	0	0	0	0	0	1803.15	0	0	0	0	0	0	0	0	0	0	0	0	0	0	0	0	0	0	0	0	0	0	0	0	0	0	0	0
18869_5108_x7688_y4065	6473.8	2090.15	3037.4	SSp-bfd	SSp-bfd	5	Pvalb-T2A-CreERT2;Ai166_396477-18869	18869	CTX_ET	TPC_sim	0	0	0	499.313	10160.7	138.774	0	1040.94	0	1718.36	0	0	0	0	0	0	0	0	0	0	0	0	0	0	0	0	0	0	0	0	0	0	0	0	0	0	0	0	0
18869_5123_x17555_y3609	6536.62	1267.82	4664.4	RSPagl	RSPagl	6a	Pvalb-T2A-CreERT2;Ai166_396477-18869	18869			0	3194.48	19.9967	0	0	1408.1	0	0	4081.71	0	0	0	0	0	0	0	0	0	0	0	0	0	0	0	0	0	0	0	0	0	0	0	0	0	0	8749.79	270.1	0	0
18869_5126_x8617_y7685	6633.02	3706.98	3355.02	RT	RT	unknown	Pvalb-T2A-CreERT2;Ai166_396477-18869	18869			0	0	0	0	0	0	0	0	0	0	0	0	0	0	0	0	0	0	0	0	0	0	0	0	0	0	0	0	0	0	0	0	0	0	0	0	0	0	0
18869_5150_x8933_y7652	6644.42	3530.55	3481.62	RT	RT	unknown	Pvalb-T2A-CreERT2;Ai166_396477-18869	18869			0	0	0	0	0	0	0	0	0	0	0	0	0	0	0	0	0	0	0	0	0	0	0	0	0	0	0	0	0	0	0	0	0	0	0	0	0	0	0
18869_5213_x7186_y4274	6612.38	2224.27	2783.8	SSp-bfd	SSp-bfd	5	Pvalb-T2A-CreERT2;Ai166_396477-18869	18869	CTX_ET	TPC_sim	0	0	0	0	6732.59	0	0	0	0	0	0	0	0	0	0	0	0	0	0	0	0	0	0	0	0	0	0	0	0	0	0	0	0	0	0	0	0	0	0
18869_5237_x7485_y4162	6629.42	2184.5	2945.6	SSp-bfd	SSp-bfd	5	Pvalb-T2A-CreERT2;Ai166_396477-18869	18869	CTX_ET	TPC_com	0	0	0	0	7839.42	0	0	0	0	577.133	375.717	0	0	0	0	0	0	0	0	0	0	0	0	0	0	0	0	0	0	0	0	0	0	0	0	0	0	0	0
18869_5286_x15761_y3297	6720.4	1150.22	5287.3	RSPv	RSPv	5	Pvalb-T2A-CreERT2;Ai166_396477-18869	18869			0	0	0	0	0	0	0	0	0	0	0	0	0	0	0	0	0	0	0	0	0	0	0	0	0	0	0	0	0	0	0	0	0	0	0	0	4265.8	28599.1	0
18869_5317_x6063_y4638	6709.08	2393.02	2171.88	SSp-bfd	SSp-bfd	6a	Pvalb-T2A-CreERT2;Ai166_396477-18869	18869			0	0	0	0	20798.7	0	0	0	0	0	1229.04	0	0	0	0	0	0	0	0	0	0	0	0	0	0	0	0	0	0	0	0	0	0	0	0	0	0	0	0
18869_5343_x5414_y5337	6705.5	2769.7	1846.83	SSs	SSs	5	Pvalb-T2A-CreERT2;Ai166_396477-18869	18869	CTX_ET	TPC_sim	0	617.246	0	658.033	2121.49	0	59.9617	379.536	0	0	6474.86	0	0	0	0	0	0	0	0	0	0	0	0	0	0	0	0	0	0	0	0	0	0	0	0	0	0	0	0
18869_5393_x8284_y3671	6699	1877.1	3322.8	SSp-bfd	SSp-bfd	5	Pvalb-T2A-CreERT2;Ai166_396477-18869	18869	CTX_ET	TPC_sim	0	0	0	0	1287.63	19.9884	0	1224.49	0	2681.66	0	0	0	0	0	0	0	0	0	0	0	0	0	0	0	0	0	0	0	0	0	0	0	0	0	0	0	0	119.557
18869_5418_x23277_y4971	7037.42	1861.47	1919.57	SSp-bfd	SSp-bfd	4	Pvalb-T2A-CreERT2;Ai166_396477-18869	18869			0	0	0	0	49925.6	0	0	0	0	0	3111.9	0	0	0	0	0	0	0	0	0	0	0	0	0	0	0	0	0	0	0	0	0	0	0	0	0	0	0	0
18869_5431_x21494_y4633	7444.17	1684.05	2507.82	SSp-bfd	SSp-bfd	5	Pvalb-T2A-CreERT2;Ai166_396477-18869	18869			0	0	0	0	20549.1	0	0	0	0	0	20.0032	0	0	0	0	0	0	0	0	0	0	0	0	0	0	0	0	0	0	0	0	0	0	0	0	0	0	0	269.254
18869_5444_x13271_y3998	6894.7	1998.97	5320.65	CA1	RSPv	5	Pvalb-T2A-CreERT2;Ai166_396477-18869	18869		TPC_com	0	0	30.0119	0	0	0	0	0	0	0	0	0	0	0	0	0	0	0	0	0	0	0	0	0	0	5472.76	1100.52	0	0	0	0	0	0	0	0	0	0	2511.17	0
18869_5482_x15126_y4142	7014.95	2053.32	5532.45	fiber tracts	RSPv	5	Pvalb-T2A-CreERT2;Ai166_396477-18869	18869		TPC_sim	0	0	0	0	0	0	0	0	0	0	0	0	0	0	0	0	0	0	0	0	0	0	0	0	0	0	0	0	0	0	0	0	0	0	0	0	0	15258.9	0
18869_5553_x7275_y3994	6940.85	2077.75	2817.08	SSp-bfd	SSp-bfd	5	Pvalb-T2A-CreERT2;Ai166_396477-18869	18869	CTX_ET	TPC_com	0	0	0	0	7033.5	0	0	0	0	0	99.5484	0	69.8503	0	0	0	0	9.99306	0	0	0	0	0	0	0	0	0	0	0	0	0	0	0	0	0	0	0	0	0
18869_5571_x8792_y4549	6899.52	2435.02	3572.55	CA3	CA3	unknown	Pvalb-T2A-CreERT2;Ai166_396477-18869	18869			0	0	0	0	0	0	0	0	0	0	0	0	0	0	0	0	0	0	0	0	0	0	0	0	0	0	0	0	0	0	0	0	0	0	0	0	0	0	0
18869_5684_x13521_y3699	7202	1834.62	5357.25	fiber tracts	RSPv	5	Pvalb-T2A-CreERT2;Ai166_396477-18869	18869		TPC_sim	0	0	0	0	0	0	0	0	0	0	0	0	0	0	0	0	0	0	0	0	0	0	0	0	0	1621.13	3983.69	0	0	0	0	0	0	0	0	0	10.0063	1881.48	0
18869_5692_x6534_y3440	7125.1	1635.57	2345.22	SSp-bfd	SSp-bfd	4	Pvalb-T2A-CreERT2;Ai166_396477-18869	18869			0	0	0	0	39818.2	0	0	0	0	0	0	0	0	0	0	0	0	0	0	0	0	0	0	0	0	0	0	0	0	0	0	0	0	0	0	0	0	0	0
18869_5694_x15073_y4098	7268.98	2049.35	5564.35	fiber tracts	RSPv	5	Pvalb-T2A-CreERT2;Ai166_396477-18869	18869		TPC_sim	0	0	0	0	0	0	0	0	0	0	0	0	0	0	0	0	0	0	0	0	0	0	0	0	0	0	1061.09	0	0	0	0	0	0	0	0	0	556.497	20407	0
18869_5705_x4706_y6107	7104.62	3238.23	1499.1	AUDv	AUDv	5	Pvalb-T2A-CreERT2;Ai166_396477-18869	18869			0	0	0	0	0	0	0	0	0	0	20924.1	0	0	3401.12	0	0	10154.2	0	0	0	0	0	0	0	0	0	0	0	0	0	0	0	0	0	0	0	0	0	0
18869_5754_x7159_y3959	7170.38	2057.3	2762.5	fiber tracts	SSp-bfd	5	Pvalb-T2A-CreERT2;Ai166_396477-18869	18869	CTX_ET	TPC_sim	0	0	0	0	2798.78	0	0	0	0	0	504.424	0	0	0	0	0	0	0	0	0	0	0	0	0	0	0	0	0	0	0	0	0	0	0	0	0	0	0	0
18869_5802_x13547_y4406	7358.9	2242.27	5355.62	CA1	RSPv	1	Pvalb-T2A-CreERT2;Ai166_396477-18869	18869			0	0	0	0	0	0	0	0	0	0	0	0	0	0	0	0	0	0	0	0	0	0	0	0	0	0	4738.56	0	0	0	0	0	0	0	0	0	0	8741.59	0
18869_5941_x16325_y2938	7590	914.975	5075.4	RSPv	RSPv	6a	Pvalb-T2A-CreERT2;Ai166_396477-18869	18869			0	0	0	0	0	0	0	0	0	0	0	0	0	0	0	0	0	0	0	0	0	0	0	0	0	0	0	0	0	0	0	0	0	0	0	0	19149.6	2043.78	0
18869_5980_x7654_y3517	7420.75	1670.2	2976.28	SSp-bfd	SSp-bfd	5	Pvalb-T2A-CreERT2;Ai166_396477-18869	18869	CTX_ET	TPC_sim	0	0	0	0	5133.93	0	0	0	163.19	119.47	0	0	0	0	0	0	0	187.286	0	0	0	0	0	0	0	0	0	0	0	0	0	0	0	0	0	0	0	0	279.288
18869_6076_x17177_y3306	7791.42	1167.43	4776.12	fiber tracts	RSPagl	unknown	Pvalb-T2A-CreERT2;Ai166_396477-18869	18869			0	0	0	0	0	0	0	0	0	0	0	0	0	0	0	0	0	0	0	0	0	0	0	0	0	0	0	0	0	0	0	0	0	0	0	2718.93	4510.57	1537.39	0
18869_6241_x19347_y3562	8049.45	1454.5	3475.6	fiber tracts	VISp	unknown	Pvalb-T2A-CreERT2;Ai166_396477-18869	18869			0	0	0	0	0	0	0	0	0	0	0	0	0	0	0	0	0	0	0	0	6171.85	0	378.21	0	0	0	0	0	0	0	0	0	0	0	0	0	0	0	68.7648
18869_6291_x15236_y3478	8046.2	1244.25	5477.77	RSPv	RSPv	5	Pvalb-T2A-CreERT2;Ai166_396477-18869	18869		TPC_sim	0	0	0	0	0	0	0	0	0	0	0	0	0	0	0	0	0	0	553.95	0	0	0	0	0	0	0	489.254	0	0	0	0	0	0	0	0	1688.19	3837.92	20293.1	0
18869_6454_x17703_y2478	8293.3	467.5	4355.92	RSPagl	RSPagl	2/3	Pvalb-T2A-CreERT2;Ai166_396477-18869	18869			0	0	0	0	0	0	0	0	0	0	0	0	0	0	0	0	0	0	9.99307	0	0	0	5801.05	0	0	0	0	0	0	0	0	0	0	0	0	16750.6	0	0	0
18869_6732_x9649_y3919	8387	1993.93	3746.08	ProS	SUB	unknown	Pvalb-T2A-CreERT2;Ai166_396477-18869	18869			0	0	0	0	0	0	0	0	0	0	0	0	0	0	0	0	0	0	0	0	0	0	0	0	0	0	0	0	0	0	0	0	0	0	0	0	0	0	0
18869_6854_x10735_y2978	8639.17	1195.53	4133.3	fiber tracts	VISp	unknown	Pvalb-T2A-CreERT2;Ai166_396477-18869	18869			0	0	0	0	0	0	0	0	0	0	0	0	0	0	0	0	0	0	0	0	7995.96	0	16512.7	0	0	0	0	0	0	0	0	0	0	0	0	290.489	0	0	0
18869_7121_x17742_y2862	9086.3	681.8	4405.92	RSPagl	RSPagl	5	Pvalb-T2A-CreERT2;Ai166_396477-18869	18869			0	0	0	0	0	0	0	0	0	0	0	0	0	0	0	0	0	0	0	0	0	0	1964.9	0	0	0	0	0	0	0	0	0	0	0	0	22124.6	0	0	0
18869_7358_x8916_y4859	9305.95	2686.7	3298.88	POST	POST	unknown	Pvalb-T2A-CreERT2;Ai166_396477-18869	18869			0	0	0	0	0	0	0	0	0	0	0	0	0	0	0	0	0	0	0	0	0	0	0	0	0	0	0	0	0	0	0	0	0	0	0	0	0	0	0
18869_7472_x16444_y11009	9637.67	5293.48	4597.17	PRNr	PRNr	unknown	Pvalb-T2A-CreERT2;Ai166_396477-18869	18869			0	0	0	0	0	0	0	0	0	0	0	0	0	0	0	0	0	0	0	0	0	0	0	0	0	0	0	0	0	0	0	0	0	0	0	0	0	0	0
18869_7986_x18907_y11037	10393.8	5314.92	3525.07	PSV	PSV	unknown	Pvalb-T2A-CreERT2;Ai166_396477-18869	18869			0	0	0	0	0	0	0	0	0	0	0	0	0	0	0	0	0	0	0	0	0	0	0	0	0	0	0	0	0	0	0	0	0	0	0	0	0	0	0
18869_7989_x9123_y9916	10114.2	5030.85	3596.75	PSV	PSV	unknown	Pvalb-T2A-CreERT2;Ai166_396477-18869	18869			0	0	0	0	0	0	0	0	0	0	0	0	0	0	0	0	0	0	0	0	0	0	0	0	0	0	0	0	0	0	0	0	0	0	0	0	0	0	0
191801_1996_x10466_y16907	2527.9	5050.8	4492.23	AON	AON	unknown	Cux2-CreERT2;Ai166_420489-191801	191801			0	0	0	0	0	0	0	0	0	0	0	0	0	0	0	0	0	0	0	0	0	0	0	0	0	0	0	0	0	0	0	0	0	0	29.9881	0	0	0	0
191801_3966_x14363_y10542	4481.27	6966.98	3765.05	OT	OT	unknown	Cux2-CreERT2;Ai166_420489-191801	191801			0	0	0	0	0	0	0	0	0	0	0	0	0	0	0	0	0	0	0	0	0	0	0	0	0	0	0	0	0	0	0	0	0	0	0	0	0	0	0
191801_4180_x7440_y5386	5102.48	2718.85	1708.9	SSp-m	SSp-m	2/3	Cux2-CreERT2;Ai166_420489-191801	191801	CTX_IT		0	469.572	0	4106.69	0	0	31000	809.631	0	49.9996	99.9424	0	0	0	0	0	0	0	0	0	0	0	0	0	0	0	0	0	0	0	0	0	0	0	0	0	0	0	0
191801_4228_x15043_y11097	4766.67	7306.27	3944.57	OT	OT	unknown	Cux2-CreERT2;Ai166_420489-191801	191801			0	0	0	0	0	0	0	0	0	0	0	0	0	0	0	0	0	0	0	0	0	0	0	0	0	0	0	0	0	0	0	0	0	0	0	0	0	0	0
191801_4724_x4226_y10240	5374.2	938.35	4384.8	MOp	SSp-ll	2/3	Cux2-CreERT2;Ai166_420489-191801	191801	CTX_IT		0	29921.6	6261.24	209.987	0	4473.82	1036.33	887.259	39.9351	229.71	129.425	0	0	0	0	0	0	0	0	0	0	0	0	0	0	749.104	729.772	0	0	0	0	0	0	0	0	0	0	0	0
191803_8254_x7045_y21580	9896.67	3300.25	2974.38	PAR	PAR	unknown	Cux2-CreERT2;Ai166_423019-191803	191803			0	0	0	0	0	0	0	0	0	0	0	0	0	0	0	0	0	0	669.324	0	1678.25	0	229.855	0	0	0	0	0	0	0	0	0	0	0	0	139.9	0	0	0
191812_4067_x7961_y6860	5069.38	2915.73	2078.27	SSp-m	SSp-m	5	Plxnd1-CreER;Ai166_380470-191812	191812			0	5674.09	976.892	2008.12	0	0	23375.1	498.794	0	0	13776.7	0	8736.96	0	0	0	0	0	0	0	0	0	0	0	0	0	0	0	0	0	0	0	0	827.78	0	0	0	0	0
191812_4322_x7645_y6848	5369.77	2747.77	2074.12	SSp-n	SSp-n	5	Plxnd1-CreER;Ai166_380470-191812	191812			688.315	6574.63	29141	11994.8	774.933	0	17347.4	2330.82	0	913.46	8954.75	0	9543.35	0	0	0	0	0	0	0	0	0	0	0	0	0	0	0	0	0	0	0	0	801.96	0	0	0	0	0
191812_4664_x8027_y25176	5734.85	3157.12	1682.4	SSs	SSs	5	Plxnd1-CreER;Ai166_380470-191812	191812			1098.82	1951.26	9273.85	3495.79	0	0	3890.77	0	0	0	14813.8	0	1673.91	0	0	0	0	0	0	0	0	0	0	0	0	0	0	0	0	0	0	0	0	0	0	0	0	0	0
191812_5154_x9610_y25921	6292.75	3847.65	1347.9	SSs	VISC	5	Plxnd1-CreER;Ai166_380470-191812	191812			1238.45	8341.38	22557.2	1515.59	998.775	129.832	1126.44	1954.84	0	578.314	20012.2	5107.79	11341	0	0	0	0	0	0	0	0	0	0	0	0	0	0	0	0	0	0	0	4489.16	7643.55	0	0	0	0	0
210254_2226_x16029_y23953	2880.88	2671.02	3914.18	MOs	MOs	5	Sst-Cre;Ai139_207186_210254-15257	210254			0	0	4568.33	0	0	0	0	0	0	0	0	0	0	0	0	0	0	0	0	0	0	0	0	0	0	0	0	0	0	0	0	0	0	0	0	0	0	0	0
210254_2309_x13266_y25533	3116.43	3668.05	3326.02	MOs	MOs	5	Sst-Cre;Ai139_207186_210254-15257	210254			0	1368.31	5136.46	0	0	0	0	0	0	0	0	0	0	0	0	0	0	0	0	0	0	0	0	0	0	0	0	0	0	0	0	0	5025.18	0	0	0	0	0	0
210254_2627_x17126_y20600	3500.15	2038.75	5093.92	MOs	ACAd	5	Sst-Cre;Ai139_207186_210254-15257	210254			0	0	9997.03	0	0	0	0	0	0	0	0	0	0	0	0	0	0	0	0	0	0	0	0	0	0	2722.75	0	0	0	0	0	0	0	0	0	0	0	0	0
210254_3271_x15413_y13333	4477.95	2521.23	3480.9	MOp	MOp	6a	Sst-Cre;Ai139_207186_210254-15257	210254			0	6286.96	0	0	0	0	0	0	0	0	0	0	0	0	0	0	0	0	0	0	0	0	0	0	0	0	0	0	0	0	0	0	0	0	0	0	0	0	0
210254_4021_x16401_y21556	5300.27	1784.9	4866.42	MOs	MOs	6a	Sst-Cre;Ai139_207186_210254-15257	210254			0	49.5296	2375.36	0	0	0	0	0	0	0	0	0	0	0	0	0	0	0	0	0	0	0	0	0	0	4629.35	0	0	0	0	0	0	0	0	0	0	0	0	0
210254_4149_x16164_y21238	5475.98	1823.2	4974.35	ACAd	ACAd	6a	Sst-Cre;Ai139_207186_210254-15257	210254			0	0	369.866	0	0	0	0	0	0	0	0	0	0	0	0	0	0	0	0	0	0	0	0	0	0	5135.88	1317.52	0	0	0	0	0	0	0	0	0	0	0	0
210254_4397_x16794_y21812	5768.12	1534.4	4644.58	MOp	MOp	6a	Sst-Cre;Ai139_207186_210254-15257	210254			0	3989.12	1381.92	0	0	0	0	0	0	0	0	0	0	0	0	0	0	0	0	0	0	0	0	0	0	0	0	0	0	0	0	0	0	0	0	0	0	0	0
210254_4485_x16442_y16836	5773.65	1628.3	4645.52	MOp	MOp	6a	Sst-Cre;Ai139_207186_210254-15257	210254			0	4448.03	2993.16	0	0	0	0	0	0	0	0	0	0	0	0	0	0	0	0	0	0	0	0	0	0	0	0	0	0	0	0	0	0	0	0	0	0	0	0
210254_4500_x16614_y17147	5734.88	1541.03	4860.17	MOs	MOs	6a	Sst-Cre;Ai139_207186_210254-15257	210254			0	1133.07	4076.09	0	0	0	0	0	0	0	0	0	0	0	0	0	0	0	0	0	0	0	0	0	0	284.269	0	0	0	0	0	0	0	0	0	0	0	0	0
236174_2657_x11930_y12250	3123.27	4293.95	3376.1	AId	AId	5	Gnb4-IRES2-CreERT2;Ai139-hyg_236174-16124	236174			1477.53	0	1442.2	0	0	0	0	0	0	0	0	0	0	0	0	0	0	0	0	0	0	0	0	0	0	0	0	0	0	21814.5	426.693	2857.91	20504.4	0	5273.81	0	0	0	0
236174_2669_x10674_y13239	3127.98	3635.93	3811.93	AId	AId	6a	Gnb4-IRES2-CreERT2;Ai139-hyg_236174-16124	236174			5930.43	275.346	2597.83	0	0	0	0	0	0	0	0	0	0	0	0	0	0	0	0	0	0	0	0	0	0	0	0	37.9516	0	17920.8	2870.27	8398.77	12225.7	0	882.951	0	0	0	0
236174_2801_x11376_y11451	3193.15	4132.02	3145.77	AId	AId	5	Gnb4-IRES2-CreERT2;Ai139-hyg_236174-16124	236174			7167.61	9219.56	50665.1	0	0	0	39.2708	0	0	0	9.9947	1322.48	249.728	0	0	0	0	0	0	0	0	0	0	0	0	0	0	0	0	4176.54	0	0	52905.7	2122.78	302.122	0	0	0	0
236174_3001_x12887_y24248	3759.85	3816.52	3526.05	AId	AId	6a	Gnb4-IRES2-CreERT2;Ai139-hyg_236174-16124	236174			8069.31	54787.3	86559.8	0	0	944.959	3523.04	607.706	0	10.0051	0	0	0	0	0	0	0	0	0	0	0	0	0	0	0	482.501	0	2580.43	0	8936.52	0	239.254	15613.5	198.81	149.168	0	0	0	0
236174_3029_x12820_y24699	3874.85	3804.52	3390.95	MOp	MOp	6a	Gnb4-IRES2-CreERT2;Ai139-hyg_236174-16124	236174			14757.1	10390.5	71198.2	19.9615	0	0	0	8.85459	0	0	2241.11	2586.52	199.725	0	0	0	0	0	0	0	0	0	0	0	129.596	228.224	0	608.901	0	5519.86	0	408.491	14167.7	1957.24	0	0	0	0	0
236174_3215_x11999_y11133	4009.15	4361.9	3239.07	AId	AId	6a	Gnb4-IRES2-CreERT2;Ai139-hyg_236174-16124	236174			5675.69	214.456	65893.3	0	0	0	0	0	0	0	0	2349.27	2082.02	0	0	0	0	0	0	0	0	0	0	0	0	22356.5	711.578	16791.9	1536.67	0	3057.15	1959.41	10363.4	4753.99	662.631	0	0	0	0
236174_3229_x11884_y10380	4010.95	4317.67	2970.8	AId	AId	6a	Gnb4-IRES2-CreERT2;Ai139-hyg_236174-16124	236174			8930.77	19352.6	59795.9	0	0	0	61.4392	0	0	0	89.9373	1873.62	10296.2	0	0	0	0	0	0	0	0	0	0	0	0	2429.84	0	3739.95	0	3052.7	193.891	397.873	29561	7510.71	0	0	0	0	0
236174_3229_x11951_y11316	4079.7	4283.9	3279.25	fiber tracts	CLA	unknown	Gnb4-IRES2-CreERT2;Ai139-hyg_236174-16124	236174			6147.45	7719.24	39730.6	0	0	0	0	0	0	0	0	399.363	0	0	0	0	0	0	0	0	0	0	0	0	0	9173.95	942.508	3765.48	0	4541.82	558.131	4904.95	5999.09	0	0	0	0	0	0
236174_3229_x12413_y11831	4110.08	4360.75	3622.32	CP	CLA	unknown	Gnb4-IRES2-CreERT2;Ai139-hyg_236174-16124	236174			0	17955	39054.5	703.56	0	5795.32	2279.45	1177.48	5379.21	538.781	0	0	0	0	0	0	0	0	4133.64	0	1843.66	0	6542.6	0	0	30829.4	4129.05	6563.06	2270.09	0	1202.44	0	2874.74	29.9416	0	9595.46	31822.8	26931.9	2486.7
236174_3329_x13938_y26099	4243.05	4205.42	2815.8	GU	GU	6a	Gnb4-IRES2-CreERT2;Ai139-hyg_236174-16124	236174			388.966	23926.8	9342.7	0	0	0	22818.1	0	0	0	0	6851.55	0	0	0	0	0	0	0	0	0	0	0	0	0	0	0	0	0	129.823	0	0	5859.36	0	0	0	0	0	0
236174_3429_x12632_y10625	4316.15	4627.65	3082.9	CP	CLA	unknown	Gnb4-IRES2-CreERT2;Ai139-hyg_236174-16124	236174			0	0	8783.63	0	0	0	0	0	0	0	0	0	258.455	0	0	0	0	0	311.195	0	2962.7	0	1228.15	0	0	21498.8	4187.43	4694.12	439.757	0	0	0	404.713	0	318.959	448.533	3565.19	31940.9	1282.73
236174_3447_x12562_y10626	4267.17	4604.08	3080.88	fiber tracts	CLA	unknown	Gnb4-IRES2-CreERT2;Ai139-hyg_236174-16124	236174			0	617.252	6032.2	0	0	0	0	0	449.102	0	0	1796.02	708.991	0	0	0	0	0	1227.37	616.074	3822.47	117.989	638.94	0	0	14781.2	876.81	2247	0	0	0	0	1488.3	978.667	0	4745.22	14744	117.646	437.772
236174_3529_x12805_y10541	4445.85	4736.17	3040.68	CP	CLA	unknown	Gnb4-IRES2-CreERT2;Ai139-hyg_236174-16124	236174			0	4955.64	32176.5	0	0	0	0	0	0	0	0	0	0	0	0	0	0	0	0	648.021	2132.13	1192.27	0	282.706	189.554	18878	3886.59	0	0	0	0	0	69.9838	1398.12	0	279.906	14890.3	3433.06	0
236174_3529_x13394_y26567	4408.65	3896.18	2762.88	SSp-m	SSp-m	6a	Gnb4-IRES2-CreERT2;Ai139-hyg_236174-16124	236174			0	31629.4	7478.85	552.932	0	0	98713	0	0	0	20001.3	11154.4	478.127	0	0	0	0	0	0	0	0	0	0	0	0	0	0	0	0	0	0	0	433.025	0	0	0	0	0	0
236174_3529_x13688_y26111	4450.55	4016.02	2947.7	CP	GU	unknown	Gnb4-IRES2-CreERT2;Ai139-hyg_236174-16124	236174			1254.25	27912.5	50863.7	5740.92	109.593	0	25095	387	0	874.985	11309.5	12644.6	0	0	0	0	0	0	0	0	0	0	0	0	0	0	0	0	0	1362.73	0	0	4271.09	0	0	0	0	0	0
236174_3536_x15159_y25525	4466.02	4674.27	2961.1	CP	CLA	unknown	Gnb4-IRES2-CreERT2;Ai139-hyg_236174-16124	236174			1193.55	762.983	1623.03	0	0	0	0	0	0	0	0	2120.5	249.147	0	0	0	89.309	0	0	0	0	0	0	0	0	4713.44	5395.15	7480.84	777.327	1722.1	5156.19	4658.37	1815.59	1775.52	0	0	0	0	0
236174_3629_x15224_y26052	4724.92	4365.1	2401.35	GU	GU	6a	Gnb4-IRES2-CreERT2;Ai139-hyg_236174-16124	236174			5573.16	35795	91600.3	14750.8	199.549	0	13906.9	3649.21	0	287.915	5630.14	8511.31	1629.24	0	0	0	0	0	0	0	0	0	0	0	0	1015.23	0	2274.07	69.1052	810.716	0	386.356	1292.54	3832.82	0	0	0	0	0
236174_3729_x12692_y9419	4581.62	4689.42	2612.3	CLA	CLA	unknown	Gnb4-IRES2-CreERT2;Ai139-hyg_236174-16124	236174			0	7084.84	9140.41	0	9.99375	1672.74	0	0	1304.92	0	0	459.337	339.074	0	19.9876	0	682.629	0	3696.06	0	0	0	0	0	0	8745.84	2264.71	0	0	0	0	0	4782.29	0	0	4144.21	33686.6	20892.8	7383.19
236174_3729_x13645_y9551	4724.98	5072.9	2544.32	CLA	CLA	unknown	Gnb4-IRES2-CreERT2;Ai139-hyg_236174-16124	236174			0	0	0	0	0	0	0	0	0	0	0	0	0	0	0	0	0	0	0	0	0	0	0	0	1128.16	0	0	0	0	0	0	0	927.913	239.18	1308.96	0	0	0	0
236174_3729_x15151_y26698	4701.83	4547.73	2548.75	AId	AId	6b	Gnb4-IRES2-CreERT2;Ai139-hyg_236174-16124	236174			5836.84	2478.81	100086	0	0	0	259.676	0	0	0	735.422	792.753	799.147	0	0	0	0	0	0	628.73	988.949	0	0	349.573	1037.18	14781.7	1876.46	9080.79	621.348	1818.96	6419.61	4153.75	349.074	188.241	136.489	0	0	0	0
236174_3729_x15443_y26410	4683	4723.35	2559.3	CLA	CLA	unknown	Gnb4-IRES2-CreERT2;Ai139-hyg_236174-16124	236174			0	1370.99	15833	0	2775.75	139.553	0	529.368	0	199.917	0	0	0	0	0	0	0	3512.65	626.993	2126.81	6928.95	0	1794	0	0	38376	42890.2	11650.4	1245.08	3570.15	0	179.344	1537.91	68.6511	189.098	1469.54	12532.3	25927	0
236174_3829_x13590_y9284	4813	5039	2473.48	CLA	CLA	unknown	Gnb4-IRES2-CreERT2;Ai139-hyg_236174-16124	236174			0	360.624	38989.8	0	0	0	0	0	555.845	0	757.358	19.9998	0	808.024	0	0	19.9972	1194.7	2322.89	0	2556.35	0	2061.7	0	0	21505.9	1718.6	7284.62	1682.75	0	2801.77	1746.49	895.658	993.187	168.928	5313.29	11428	7580.23	895.781
236174_3829_x14826_y27255	4725.38	4367.4	2401.08	GU	GU	6a	Gnb4-IRES2-CreERT2;Ai139-hyg_236174-16124	236174			5573.18	48861.8	112536	14750.8	199.549	0	14843.1	3649.21	0	287.915	5630.12	8543.94	1629.24	0	0	0	0	0	0	0	0	0	0	0	0	309.263	0	494.098	0	810.793	0	386.356	1292.03	3832.82	0	0	0	0	0
236174_3829_x16301_y26647	4994.67	5079.3	2323.47	CLA	CLA	unknown	Gnb4-IRES2-CreERT2;Ai139-hyg_236174-16124	236174			0	0	0	0	0	0	0	0	0	0	0	0	0	0	0	0	0	0	0	0	0	29.9842	0	0	2286.38	0	0	0	0	0	0	0	197.618	1778.9	0	0	0	0	0
236174_3893_x17507_y26071	4888.67	5566.45	2394.3	PIR	EPd	unknown	Gnb4-IRES2-CreERT2;Ai139-hyg_236174-16124	236174			0	0	0	0	0	0	0	0	0	0	0	0	0	0	0	0	0	0	0	0	0	0	0	0	0	0	0	0	0	1393.77	0	0	0	674.627	3136.32	0	0	0	0
236174_3929_x12721_y8845	4770.98	4729.7	2380.88	AId	AId	6a	Gnb4-IRES2-CreERT2;Ai139-hyg_236174-16124	236174			5444.08	15095.9	42089.6	13545.7	4958.44	348.929	7496.91	15377.9	494.548	8308.11	3226.77	731.378	0	0	0	0	0	0	0	0	0	0	0	0	0	2410.15	0	1672.48	0	2814.8	0	2102.56	6366.44	1740.75	0	0	0	0	0
236174_3929_x13599_y9165	4880.05	5032.85	2445.9	CLA	CLA	unknown	Gnb4-IRES2-CreERT2;Ai139-hyg_236174-16124	236174			109.972	0	0	0	0	0	0	0	0	0	0	0	0	0	0	0	0	0	0	0	0	0	0	0	2833.77	3941.95	13493.5	5861.11	1177.23	0	9599.76	3375.87	139.183	2846.6	129.634	0	1436.45	5440.07	0
236174_3970_x13439_y8678	4996.35	4980.9	2271.52	CLA	CLA	unknown	Gnb4-IRES2-CreERT2;Ai139-hyg_236174-16124	236174			1033.88	0	6560.16	0	0	0	0	0	0	0	0	0	0	0	0	0	0	0	0	0	0	0	0	0	0	8232.81	396.427	11254.3	589.478	11602.9	6752.29	18810.6	5099.82	2706.25	5343.54	0	0	0	0
236174_4029_x13079_y8858	4909.7	4853.77	2374.5	CLA	CLA	unknown	Gnb4-IRES2-CreERT2;Ai139-hyg_236174-16124	236174			0	0	7552.52	0	0	0	0	0	0	0	0	84.922	0	0	0	0	0	0	0	0	0	0	0	0	0	12571.4	10432.7	59.0736	0	0	0	0	900.434	9.99952	0	1123.05	18346.7	21553.6	0
236174_4129_x16214_y10304	5101.58	5910.25	3019	unknown	FS	unknown	Gnb4-IRES2-CreERT2;Ai139-hyg_236174-16124	236174			0	0	0	0	0	0	0	0	0	0	0	0	0	0	0	0	0	0	0	0	557.336	3392.33	0	0	0	0	0	0	0	0	0	0	0	0	0	167.465	0	0	0
236174_4229_x13663_y8589	5155.05	5027.05	2287.93	CLA	CLA	unknown	Gnb4-IRES2-CreERT2;Ai139-hyg_236174-16124	236174			0	378.519	12007.2	0	0	0	0	0	0	0	0	0	0	0	0	0	0	0	0	1269.6	3057.87	7039.06	0	9.99436	475.741	14534.2	7099.59	1586.28	568.096	0	0	0	69.9638	837.787	0	3047.09	4059.67	8171.55	0
236174_4266_x13848_y8550	5216.88	5083.92	2293.57	CLA	AIp	6a	Gnb4-IRES2-CreERT2;Ai139-hyg_236174-16124	236174			289.183	219.393	3300.2	0	0	0	119.914	0	0	0	0	269.566	1236.16	0	0	0	0	0	0	0	0	0	115.369	0	0	31883.3	18334.7	3480.18	0	1246.79	0	1095.97	0	683.743	0	2028.74	16149	12467.3	0
236174_4429_x13147_y8003	5433.2	4820.92	2103.7	CLA	CLA	unknown	Gnb4-IRES2-CreERT2;Ai139-hyg_236174-16124	236174			1156.27	5253.56	33286	0	0	0	29.9888	0	0	0	597.956	2753.47	1318.36	0	0	0	289.569	0	339.696	0	1172.67	299.286	3907.69	0	797.442	6674.81	0	2411.19	0	479.63	0	0	139.91	5483.88	0	2538.79	2099.62	0	9.99303
236174_4647_x16405_y27845	5894.98	5063.3	2004.1	CLA	CLA	unknown	Gnb4-IRES2-CreERT2;Ai139-hyg_236174-16124	236174			2347.69	0	310.347	0	0	0	0	0	0	0	0	0	0	0	0	0	0	0	5497.78	0	7319.22	537.637	983.108	0	1704.11	1228.95	16154.1	1909.17	853.549	1120.72	0	1747.42	348.755	1515.37	0	5310.71	14190.1	68582.3	5652.36
236174_4729_x16869_y27809	6042.25	5238.48	1962.47	EPd	EPd	unknown	Gnb4-IRES2-CreERT2;Ai139-hyg_236174-16124	236174			0	408.252	1168.8	0	4763.38	150.942	0	0	0	0	40.005	109.888	0	0	0	0	0	0	128.372	1364.3	2467.17	59.9605	2067.78	369.04	557.088	6740.24	17347.5	5620.23	9982.13	3514.66	10445.3	6823.65	40.0064	4921.83	0	1945.88	2975.64	5560.71	437.294
236174_5138_x16501_y28259	6370.65	5002.62	1895	AIp	CLA	unknown	Gnb4-IRES2-CreERT2;Ai139-hyg_236174-16124	236174			0	727.366	12951.8	0	0	0	0	0	0	0	331.384	0	2608.99	0	226.117	369.297	3123.39	557.604	0	2452.58	14112.9	4600.42	875.334	1085.59	2471.69	12949.3	10635.7	8760.3	1032.49	0	0	0	0	4523.32	0	5282.43	13833.1	18045	0
236174_5338_x13590_y7348	6648.92	5001.6	1856.95	AIp	AIp	6a	Gnb4-IRES2-CreERT2;Ai139-hyg_236174-16124	236174			0	269.76	9485.94	0	1363.62	109.063	0	236.678	2297.48	388.986	129.901	1738.35	513.669	489.165	199.375	1571.42	0	3129.58	1287.1	6676.79	24031.4	3276.62	1969.09	2042.62	9865.06	15165.6	6557.94	8350.18	69.9189	0	0	0	468.359	879.263	0	5206.72	9162.77	4734.08	775.335
236174_5670_x14073_y29439	6979.65	3679.65	1703.45	SSs	SSs	6a	Gnb4-IRES2-CreERT2;Ai139-hyg_236174-16124	236174			0	12050.5	9922.82	0	1386.24	16061.3	0	21294	0	3202.48	7951.51	0	1575.85	1824.96	894.162	0	1408.67	0	0	0	0	0	0	0	0	2523.81	0	0	0	0	0	0	0	1167.05	0	0	0	0	0
236174_5738_x11712_y6818	6921.05	4187.67	1666.95	VISC	VISC	6a	Gnb4-IRES2-CreERT2;Ai139-hyg_236174-16124	236174			0	11339.1	20304.8	2669.62	198.481	79.2665	7060.11	15528.1	59.7572	1521.43	9321.19	0	20321	861.639	49.9946	0	3515.99	0	0	0	0	0	0	0	0	1455.46	0	59.6776	0	0	0	0	0	508.426	0	0	0	0	0
236174_5840_x15240_y29741	7214.7	4186.5	1433.3	TEa	TEa	6a	Gnb4-IRES2-CreERT2;Ai139-hyg_236174-16124	236174			0	37790.8	19828.8	4779.48	8167.56	12109	3462.26	23668.8	1041.07	4926.86	16257.3	0	2554.63	1670.48	619.126	0	6183.8	0	0	0	0	0	0	0	0	89.7497	0	241.367	0	0	0	0	0	0	0	0	0	0	0
236174_6338_x12092_y5845	7586.02	4410.62	1153.35	ECT	ECT	5	Gnb4-IRES2-CreERT2;Ai139-hyg_236174-16124	236174			0	404.906	11778.9	887.931	46137.7	20.0036	0	438.852	1413.35	1643.4	10481.7	688.464	762.798	4439.51	1323.67	0	466.879	866.611	0	0	0	0	0	0	0	0	0	0	0	0	0	0	19.9251	684.464	0	0	0	0	1411.34
236174_6338_x12496_y6617	7647.5	4515.33	1533	ECT	ECT	6a	Gnb4-IRES2-CreERT2;Ai139-hyg_236174-16124	236174			0	6506.65	35637.2	1523.78	9822.01	519.123	119.981	439.074	515.733	535.353	2693.99	119.544	895.612	0	0	0	0	0	839.982	0	0	0	0	0	0	16421.4	2600.18	1051.79	0	206.585	0	0	1174.18	4029.63	39.7695	484.941	4233.15	4864.66	1096.61
236174_6438_x12218_y5897	7687.83	4433.05	1179.2	ECT	ECT	5	Gnb4-IRES2-CreERT2;Ai139-hyg_236174-16124	236174			0	3237.31	852.384	0	27330.8	1706.12	0	498.254	1145.91	1553.74	4687.24	0	1863.08	1678.58	3676.95	180.475	815.366	1439.6	618.676	2517.45	14305.3	590.564	332.646	518.519	706.623	0	0	0	0	0	0	0	248.015	1098.48	0	0	0	0	4595.08
236174_6855_x15550_y29832	8300.03	4204.6	1317.8	ECT	ECT	6a	Gnb4-IRES2-CreERT2;Ai139-hyg_236174-16124	236174			0	7047.35	866.546	0	4051.77	478.998	0	0	418.797	0	8346.57	0	0	7570.17	8540.88	1046.31	8968.6	19.9894	527.761	855.692	4849.74	199.313	109.27	279.411	0	0	0	0	0	0	0	0	0	528.633	0	1547.24	0	0	3940.98
236174_7077_x14579_y30892	8468.83	3597.75	960.9	TEa	TEa	5	Gnb4-IRES2-CreERT2;Ai139-hyg_236174-16124	236174			0	0	0	0	0	0	0	0	0	0	0	0	9.93643	448.244	32753.7	3960.95	15651.1	578.657	0	812.542	0	0	0	2582.63	923.836	0	0	0	0	0	0	0	0	1515.92	0	0	0	0	0
[truncated: 593 more columns]
